# Supplementary material for: Sex-specific splicing occurs genome-wide during early Drosophila embryogenesis
Source: eLife journal article supplement (doi:10.7554/elife.87865), 2023-07-19

**A**

Female vs Male (con)  
Significant transcripts:92

0-2 Hr embryo

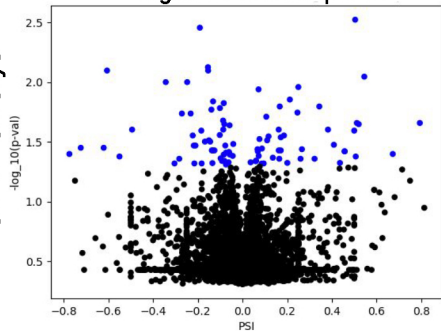**C**

ClampRNAi vs con (Female)  
Significant transcripts:246

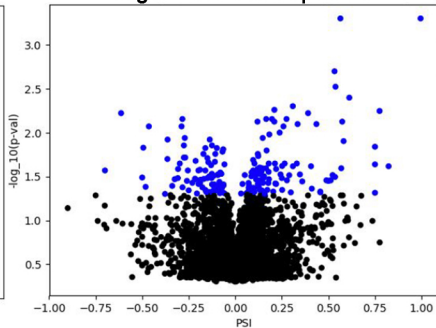**E**

ClampRNAi vs con (Male)  
Significant transcripts:192

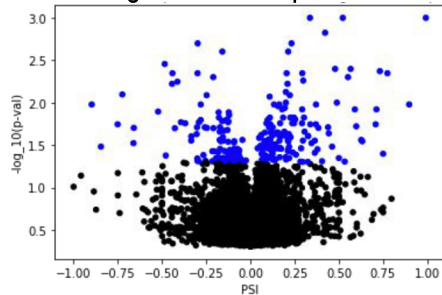**B**

Significant transcripts:138

2-4 Hr embryo

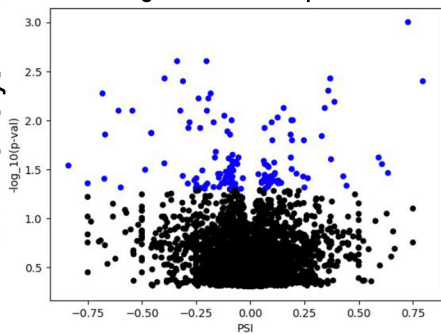**D**

Significant transcripts:398

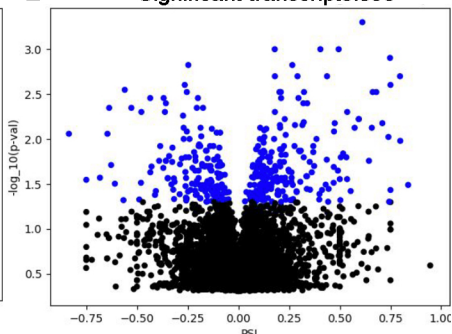**F**

Significant transcripts:244

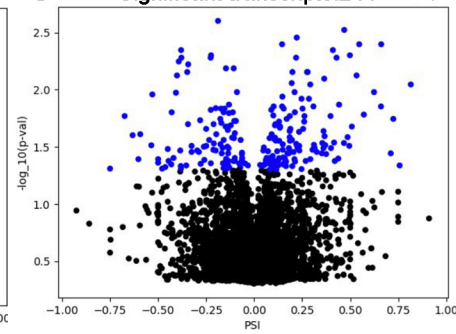

Supplement: supp [file elife_poa_e87865_Figure_2_figure_supplement_1.pdf › elife_poa_e87865_Figure_2_figure_supplement_1.pdf]
