# Supplementary material for: Sex-specific splicing occurs genome-wide during early Drosophila embryogenesis
Source: eLife. 2023 Jul 19;12:e87865. doi: 10.7554/eLife.87865 (PMC10400075; doi:10.7554/eLife.87865)
Supplement: Supplementary file 3. — (a–c) List of all and sex-specific splicing events in Drosophila third instar larvae (L3) that require CLAMP (chromatin linked adapter for MSL proteins) (a), list of genes whose splicing in females (b) and males (c) is affected by loss of CLAMP. [file elife-87865-supp3.xlsx]

## Sheet: S3a_CLAMPdependent Splicing_L3
Splicing events	dPSI	p-val	sex	gene_id	gene_name		Key		Number of splicing events
FBgn0000565;RI:3L:15512172:15512353-15512476:15512736:+	0.610545	0.0124875	F_All:189	FBgn0000565	Eip71CD		F_All	CLAMP dependent splicing events in Female L3	189
FBgn0000581;AF:2R:11452189:11452383-11453393:11452769:11452880-11453393:+	-0.482625	0.0504496	F_All:189	FBgn0000581	E(Pc)		F_Sex_Specif	CLAMP dependent Known Female specific splicing event	38
FBgn0000639;A5:3L:14097808-14097869:14097808-14097875:-	-0.620944	0.0014985	F_All:189	FBgn0000639	Fbp1		F_New_Sex_Specif.	CLAMP dependent New Female specific splicing event	101
FBgn0000667;AF:X:2035198-2036407:2036466:2035198-2042047:2042311:-	0.394923	0.0224775	F_All:189	FBgn0000667	Actn		F_Non_Sex_Specif.	CLAMP dependent Non-sex specific splicing event in Female L3	50
FBgn0001105;A3:X:15860322-15861140:15860322-15861224:+	0.408582	0.0314685	F_All:189	FBgn0001105	Gbeta13F
FBgn0001280;A5:3R:30039406-30039473:30039406-30039477:-	-0.187579	0.0544456	F_All:189	FBgn0001280	janA		M_All	CLAMP dependent splicing events in Male L3	211
FBgn0001311;MX:3R:5379688-5380354:5380530-5381322:5379688-5380645:5380821-5381322:-	0.682915	0.002997	F_All:189	FBgn0001311	kkv		M_Sex_Specif	CLAMP dependent Known Male specific splicing event	55
FBgn0001961;RI:2L:13829346:13829643-13829710:13829741:-	-0.124085	0.0304695	F_All:189	FBgn0001961	Arpc1		M_New_Sex_Specif.	CLAMP dependent New Male specific splicing event	106
FBgn0001978;A3:2L:15114213-15114300:15114213-15114312:+	-0.333333	0.0414585	F_All:189	FBgn0001978	stc		M_Non_Sex_Specif.	CLAMP dependent Non-sex specific splicing event in Male L3	50
FBgn0003607;RI:2L:8210730:8210861-8210979:8211122:-	0.365656	0.001998	F_All:189	FBgn0003607	Su(var)205
FBgn0003660;A3:2R:10251213-10251928:10251144-10251928:-	-0.172773	0.032967	F_All:189	FBgn0003660	Syb
FBgn0003660;SE:2R:10249827-10250369:10250586-10250879:-	-0.150337	0.032967	F_All:189	FBgn0003660	Syb
FBgn0003676;RI:3R:22491259:22491351-22491416:22491439:-	0.289647	0.0144855	F_All:189	FBgn0003676	T-cp1
FBgn0003890;MX:3R:27969191-27969383:27969550-27972921:27969191-27969660:27969827-27972921:-	0.2407	0.0334665	F_All:189	FBgn0003890	betaTub97EF
FBgn0003896;RI:2L:18859507:18860913-18860977:18861205:-	-1	0	F_All:189	FBgn0003896	tup
FBgn0004108;AF:3L:16766072:16766540-16773714:16773520:16773642-16773714:+	-0.429739	0.0544456	F_All:189	FBgn0004108	Nrt
FBgn0004237;AL:3R:13656846:13657125-13658462:13657324:13658297-13658462:-	0.435652	0.035964	F_All:189	FBgn0004237	Hrb87F
FBgn0004237;AL:3R:13656846:13657125-13658462:13657795:13658297-13658462:-	0.430819	0.035964	F_All:189	FBgn0004237	Hrb87F
FBgn0004362;A5:2R:21713434-21715406:21713387-21715406:+	-0.320013	0.0131119	F_All:189	FBgn0004362	HmgD
FBgn0004362;AF:2R:21701458:21702064-21715406:21713356:21713434-21715406:+	0.378525	0.0131119	F_All:189	FBgn0004362	HmgD
FBgn0004362;AF:2R:21701458:21702064-21715406:21714136:21714166-21715406:+	0.695929	0.0131119	F_All:189	FBgn0004362	HmgD
FBgn0004362;AF:2R:21713356:21713387-21715406:21714136:21714166-21715406:+	0.27903	0.0131119	F_All:189	FBgn0004362	HmgD
FBgn0004577;A3:3R:17025575-17025633:17025575-17025639:+	-0.584992	0.037962	F_All:189	FBgn0004577	Pxd
FBgn0004828;AF:X:9154685-9154785:9155012:9154685-9156580:9156669:-	-0.208285	0.0529471	F_All:189	FBgn0004828	His3.3B
FBgn0005671;A3:3R:12627575-12627640:12627561-12627640:-	-0.211724	0.023976	F_All:189	FBgn0005671	Vha55
FBgn0005672;AF:2L:19569226-19572500:19572610:19569226-19577186:19577315:-	-0.666667	0.00799201	F_All:189	FBgn0005672	spi
FBgn0010225;A5:3R:4236939-4237625:4236804-4237625:+	-0.277028	0.02997	F_All:189	FBgn0010225	Gel
FBgn0010246;AF:3L:1318480:1318769-1325995:1324563:1324629-1325995:+	-0.886434	0.00799201	F_All:189	FBgn0010246	Myo61F
FBgn0010246;AF:3L:1324563:1324629-1325995:1325117:1325260-1325995:+	0.66165	0.00799201	F_All:189	FBgn0010246	Myo61F
FBgn0010621;AF:2R:12174802:12175028-12175737:12175096:12175128-12175737:+	-0.19288	0.031968	F_All:189	FBgn0010621	Cct5
FBgn0010622;RI:2R:23061420:23061594-23061683:23062593:-	0.622316	0.00949051	F_All:189	FBgn0010622	l(2)06496
FBgn0011202;AF:2L:20758144:20758663-20760525:20760300:20760457-20760525:+	0.542389	0.044955	F_All:189	FBgn0011202	dia
FBgn0011300;MX:2R:8954851-8955713:8955858-8959107:8954851-8957029:8957156-8959107:+	-0.505343	0.0529471	F_All:189	FBgn0011300	babo
FBgn0011584;AF:2L:10009381:10009536-10010737:10010354:10010557-10010737:+	-0.18591	0.0424575	F_All:189	FBgn0011584	Trp1
FBgn0011708;RI:2L:16307346:16307389-16307483:16308329:+	-0.32625	0.0204795	F_All:189	FBgn0011708	Syx5
FBgn0013272;RI:2R:22317662:22317737-22317882:22317954:+	-0.477045	0.0509491	F_All:189	FBgn0013272	Gp150
FBgn0014184;AF:2R:12168203-12170924:12171285:12168203-12174091:12174264:-	0.315231	0.0134865	F_All:189	FBgn0014184	Oda
FBgn0014391;SE:X:15848004-15848298:15848347-15848886:-	0.250584	0.003996	F_All:189	FBgn0014391	sun
FBgn0014859;A5:2L:20690456-20713037:20690456-20713599:-	1	0	F_All:189	FBgn0014859	Hr38
FBgn0014863;AF:3R:7115838-7116652:7116716:7115838-7117651:7117732:-	0.13834	0.023976	F_All:189	FBgn0014863	Mlp84B
FBgn0015477;A3:2R:9175934-9176091:9175931-9176091:-	-0.913195	0.026973	F_All:189	FBgn0015477	Rme-8
FBgn0015772;AL:2L:18957732:18960680-18962885:18960927:18962791-18962885:-	0.627162	0.0514486	F_All:189	FBgn0015772	Nak
FBgn0016078;AL:2R:9400531:9401148-9402409:9402080:9402234-9402409:-	-0.346742	0.023976	F_All:189	FBgn0016078	wun
FBgn0016120;A5:3R:19095074-19095397:19095021-19095397:+	-0.0990508	0.027972	F_All:189	FBgn0016120	ATPsyn-d
FBgn0020235;A3:3R:29748769-29748824:29748748-29748824:-	-0.232516	0.024975	F_All:189	FBgn0020235	ATPsyn-gamma
FBgn0020251;SE:3L:6496481-6505083:6505119-6523030:+	-0.944906	0.0549451	F_All:189	FBgn0020251	sfl
FBgn0020304;AF:2L:837378-842614:842943:837378-849899:851071:-	0.307446	0.035964	F_All:189	FBgn0020304	drongo
FBgn0021979;A5:2R:23067841-23067947:23067838-23067947:+	-0.15886	0.0539461	F_All:189	FBgn0021979	l(2)k09913
FBgn0022343;A3:2R:24938842-24938956:24938842-24938974:+	0.198729	0.0509491	F_All:189	FBgn0022343	CG3760
FBgn0023023;MX:3R:5575925-5576175:5576413-5577593:5575925-5577036:5577259-5577593:+	0.601562	0.038961	F_All:189	FBgn0023023	CRMP
FBgn0023541;A5:X:2174920-2175065:2174920-2175074:-	-0.828271	0.0354645	F_All:189	FBgn0023541	Cyp4d14
FBgn0024248;A5:2L:10246039-10246900:10246039-10247025:-	0.755082	0.0254745	F_All:189	FBgn0024248	chico
FBgn0024733;A5:3L:23095305-23095426:23095305-23095437:-	0.0546419	0.0314685	F_All:189	FBgn0024733	RpL10
FBgn0024947;AF:2L:2882833-2882920:2883126:2882833-2884993:2885214:-	-0.548987	0.0224775	F_All:189	FBgn0024947	NTPase
FBgn0025630;A5:X:2072725-2073134:2072697-2073134:+	-0.666667	0.0294705	F_All:189	FBgn0025630	CG4061
FBgn0026061;AF:3L:16565867-16572274:16572401:16565867-16573266:16573334:-	0.666667	0.043956	F_All:189	FBgn0026061	Mipp1
FBgn0026718;AF:2L:8451004-8451454:8451515:8451004-8463627:8463994:-	-0.633661	0.034965	F_All:189	FBgn0026718	fu12
FBgn0027570;SE:3R:4721390-4722608:4722640-4722774:-	0.484189	0.00749251	F_All:189	FBgn0027570	Nep2
FBgn0027836;AF:2R:18171319-18171393:18171470:18171319-18172438:18172607:-	-0.206379	0.040959	F_All:189	FBgn0027836	Dgp-1
FBgn0028411;A3:2R:23811737-23811795:23811724-23811795:-	0.504619	0.015984	F_All:189	FBgn0028411	Nxt1
FBgn0029167;A3:3L:13847186-13847248:13847186-13847251:+	0.570573	0.032967	F_All:189	FBgn0029167	Hml
FBgn0029676;RI:X:3790042:3790070-3790130:3790336:+	-0.56441	0.0104895	F_All:189	FBgn0029676	HIP-R
FBgn0029914;RI:X:6849770:6851052-6851300:6851884:+	0.472688	0.0404595	F_All:189	FBgn0029914	CG4558
FBgn0029971;A3:X:7893490-7893750:7893416-7893750:-	-0.320767	0.0104895	F_All:189	FBgn0029971	CG18624
FBgn0030065;AF:X:8838323:8838484-8867549:8864109:8864258-8867549:+	-0.567519	0.0474525	F_All:189	FBgn0030065	CG12075
FBgn0030065;AF:X:8838323:8838484-8867549:8864109:8864273-8867549:+	-0.666667	0.0474525	F_All:189	FBgn0030065	CG12075
FBgn0030474;RI:X:13338452:13340427-13340518:13341009:+	-0.666667	0.031968	F_All:189	FBgn0030474	CG15747
FBgn0030685;A3:X:15754799-15755104:15754772-15755104:-	-0.442559	0.0529471	F_All:189	FBgn0030685	Graf
FBgn0030724;RI:X:16073403:16073431-16073510:16073568:-	0.339501	0.020979	F_All:189	FBgn0030724	Nipsnap
FBgn0031012;AF:X:19304094-19305294:19305299:19304094-19307639:19307925:-	-0.465137	0.027972	F_All:189	FBgn0031012	CG8051
FBgn0031115;A5:X:20427994-20428051:20427994-20428064:-	0.40879	0.0549451	F_All:189	FBgn0031115	CG11710
FBgn0031117;AF:X:20467640:20467770-20468547:20468385:20468412-20468547:+	-0.344469	0.022977	F_All:189	FBgn0031117	GstT3
FBgn0031117;SE:X:20467770-20468207:20468412-20468547:+	0.747635	0.0254745	F_All:189	FBgn0031117	GstT3
FBgn0031298;A3:2L:1082665-1082789:1082665-1082792:+	-0.222208	0.027972	F_All:189	FBgn0031298	Atg4a
FBgn0031384;AF:2L:2009859:2010313-2026768:2024012:2024265-2026768:+	-1	0	F_All:189	FBgn0031384	CG4238
FBgn0031384;AF:2L:2017540:2017851-2026768:2024012:2024265-2026768:+	-1	0	F_All:189	FBgn0031384	CG4238
FBgn0031417;A5:2L:2370988-2371042:2370988-2371048:-	0.67351	0.0184815	F_All:189	FBgn0031417	CG3597
FBgn0031453;A5:2L:2752840-2753372:2752837-2753372:+	-0.0862531	0.0464535	F_All:189	FBgn0031453	Bacc
FBgn0031737;AL:2L:5762553:5763368-5765961:5763460:5764271-5765961:-	0.314612	0.002997	F_All:189	FBgn0031737	obst-E
FBgn0031758;A3:2L:5970559-5970629:5970559-5970639:+	-0.666667	0.046953	F_All:189	FBgn0031758	Ucp4B
FBgn0032170;RI:2L:9957295:9957329-9957429:9957900:+	-0.609167	0.023976	F_All:189	FBgn0032170	CG4658
FBgn0032305;A5:2L:10842273-10842381:10842273-10842385:-	0.377164	0.0384615	F_All:189	FBgn0032305	CG6700
FBgn0032773;SE:2L:19385363-19385670:19385705-19385780:-	-0.5599	0	F_All:189	FBgn0032773	fon
FBgn0032774;AF:2L:19388569-19389765:19389799:19388569-19389927:19390075:-	0.33486	0.011988	F_All:189	FBgn0032774	CG17549
FBgn0032774;AF:2L:19388569-19389765:19389799:19388569-19389936:19390075:-	0.158077	0.044955	F_All:189	FBgn0032774	CG17549
FBgn0032979;A3:2L:22167253-22167303:22167238-22167303:-	0.477982	0.0164835	F_All:189	FBgn0032979	Clamp
FBgn0033092;AF:2R:6675822:6675912-6691698:6680146:6680730-6691698:+	-0.54367	0.0234765	F_All:189	FBgn0033092	CG9422
FBgn0033115;AF:2R:6885552:6885659-6886514:6886393:6886424-6886514:+	-0.666667	0.0434565	F_All:189	FBgn0033115	Spn42De
FBgn0033271;AF:2R:8160929-8161033:8161235:8160929-8161411:8161565:-	0.666667	0.0334665	F_All:189	FBgn0033271	CG8708
FBgn0033339;A3:2R:8895644-8895951:8895644-8895954:+	-0.329515	0.036963	F_All:189	FBgn0033339	Sec31
FBgn0033446;AF:2R:9812664-9812724:9812774:9812664-9819840:9820053:-	0.101466	0.026973	F_All:189	FBgn0033446	CG1648
FBgn0033551;AF:2R:10813405:10813464-10814031:10813549:10813736-10814031:+	0.742787	0.025974	F_All:189	FBgn0033551	CG7222
FBgn0033669;AF:2R:11968479-11968740:11968850:11968479-11970026:11970115:-	-0.893274	0.0034965	F_All:189	FBgn0033669	PI31
FBgn0033725;A5:2R:12387517-12387913:12387427-12387913:+	0.245152	0.015984	F_All:189	FBgn0033725	Cpr49Ac
FBgn0033725;SE:2R:12387517-12387913:12387939-12388300:+	0.227519	0.015984	F_All:189	FBgn0033725	Cpr49Ac
FBgn0033762;A3:2R:12654058-12654111:12654058-12654126:+	-0.497771	0.040959	F_All:189	FBgn0033762	ZnT49B
FBgn0033784;RI:2R:12935779:12936260-12936325:12936535:-	0.532398	0.0474525	F_All:189	FBgn0033784	CG13322
FBgn0034068;A3:2R:16027278-16027337:16027263-16027337:-	0.609496	0.016983	F_All:189	FBgn0034068	casp
FBgn0034246;A5:2R:17578495-17578554:17578495-17578557:-	1	0	F_All:189	FBgn0034246	Dcr-2
FBgn0034286;A3:2R:17977793-17978788:17977790-17978788:-	1	0	F_All:189	FBgn0034286	dpr13
FBgn0034381;A3:2R:18728786-18728843:18728746-18728843:-	1	0	F_All:189	FBgn0034381	List
FBgn0034618;AF:2R:21312674:21312740-21314424:21313367:21313716-21314424:+	0.917816	0.02997	F_All:189	FBgn0034618	CG9485
FBgn0034708;A5:2R:22186320-22186517:22186094-22186517:+	0.49341	0.0174825	F_All:189	FBgn0034708	Vps35
FBgn0034962;A5:2R:24034432-24034688:24034420-24034688:+	0.508855	0.0549451	F_All:189	FBgn0034962	MAN1
FBgn0035397;AF:3L:3073207:3073478-3083733:3077929:3078044-3083733:+	0.618532	0.0454545	F_All:189	FBgn0035397	CG11486
FBgn0035397;AF:3L:3077929:3078044-3083733:3081978:3082227-3083733:+	-0.849231	0.0314685	F_All:189	FBgn0035397	CG11486
FBgn0035431;AF:3L:3300883-3300989:3301142:3300883-3303048:3303112:-	0.43088	0.0539461	F_All:189	FBgn0035431	CG14968
FBgn0035473;AF:3L:3909039-3909221:3909592:3909039-3909757:3909931:-	0.341264	0.031968	F_All:189	FBgn0035473	mge
FBgn0035499;AF:3L:4115646-4115723:4115752:4115646-4122156:4122388:-	-0.289774	0.003996	F_All:189	FBgn0035499	Chd64
FBgn0035695;AF:3L:6238781-6238895:6238991:6238781-6239273:6240068:-	-1	0	F_All:189	FBgn0035695	CG10226
FBgn0035713;A5:3L:6751443-6752145:6751443-6752160:-	-0.333333	0.0549451	F_All:189	FBgn0035713	velo
FBgn0035844;RI:3L:8142612:8142818-8143408:8144710:-	-0.301121	0.0194805	F_All:189	FBgn0035844	CG13676
FBgn0035849;AF:3L:8185042-8185567:8185670:8185042-8186179:8186671:-	0.448371	0.0314685	F_All:189	FBgn0035849	ERR
FBgn0035987;A3:3L:9411982-9412155:9411982-9413203:+	0.252969	0.036963	F_All:189	FBgn0035987	CG3689
FBgn0036101;A3:3L:10695415-10695629:10695367-10695629:-	-0.784189	0.021978	F_All:189	FBgn0036101	NijA
FBgn0036337;AF:3L:13021557-13021628:13021685:13021557-13022438:13022688:-	0.249174	0.022977	F_All:189	FBgn0036337	AdenoK
FBgn0036537;A3:3L:15834883-15835194:15834879-15835194:-	0.186243	0.0514486	F_All:189	FBgn0036537	CG18081
FBgn0036752;A3:3L:17754425-17764062:17754421-17764062:-	0.798986	0.020979	F_All:189	FBgn0036752	Adgf-A
FBgn0036862;AF:3L:19285413-19288392:19288569:19285413-19291480:19291672:-	-0.51078	0.0184815	F_All:189	FBgn0036862	Gbs-76A
FBgn0036862;AF:3L:19285413-19288392:19288569:19285413-19291480:19292766:-	-0.779709	0.0184815	F_All:189	FBgn0036862	Gbs-76A
FBgn0036945;RI:3L:20188522:20188614-20188676:20188762:+	-0.247425	0.0274725	F_All:189	FBgn0036945	Ssk
FBgn0036993;AF:3L:20442419:20442469-20445948:20445158:20445293-20445948:+	-0.495869	0.0539461	F_All:189	FBgn0036993	CG5910
FBgn0037386;AF:3R:5831639:5831851-5835839:5835029:5835351-5835839:+	0.658618	0.0314685	F_All:189	FBgn0037386	CG1208
FBgn0037580;SE:3R:8344483-8344809:8345023-8345093:+	0.230502	0.0444555	F_All:189	FBgn0037580	DppIII
FBgn0037659;A5:3R:9052627-9053536:9052575-9053536:+	-0.636799	0.0499501	F_All:189	FBgn0037659	Kdm2
FBgn0037680;A3:3R:9335252-9335497:9335252-9335500:+	-0.458491	0.0344655	F_All:189	FBgn0037680	CG8121
FBgn0037697;AF:3R:9458772-9459128:9459176:9458772-9460271:9460652:-	0.426359	0.033966	F_All:189	FBgn0037697	GstZ2
FBgn0038079;AF:3R:12695129:12695406-12696123:12695998:12696047-12696123:+	-0.5768	0.023976	F_All:189	FBgn0038079	NijC
FBgn0038220;AF:3R:14289274:14289449-14290730:14290401:14290460-14290730:+	-0.517726	0.0294705	F_All:189	FBgn0038220	CG12207
FBgn0038271;RI:3R:14890231:14890261-14890334:14890426:+	-0.314206	0.0044955	F_All:189	FBgn0038271	CG3731
FBgn0038476;AF:3R:17080244:17080356-17082664:17081946:17082027-17082664:+	-0.333333	0.0414585	F_All:189	FBgn0038476	kuk
FBgn0038811;A5:3R:20592493-20592557:20592493-20592561:-	-0.575088	0.0519481	F_All:189	FBgn0038811	CG4159
FBgn0038829;AL:3R:20819129:20819494-20820650:20819626:20820443-20820650:-	0.393007	0.00599401	F_All:189	FBgn0038829	CG17271
FBgn0039321;A5:3R:25307909-25308181:25307909-25308311:-	0.537744	0.0184815	F_All:189	FBgn0039321	CG10550
FBgn0039359;A5:3R:25684516-25684959:25684516-25685018:-	-0.28078	0.0344655	F_All:189	FBgn0039359	RpL27
FBgn0039406;A3:3R:26059054-26059235:26059051-26059235:-	-0.167312	0.036963	F_All:189	FBgn0039406	RpL34a
FBgn0039690;A5:3R:29740419-29740568:29740407-29740568:+	0.313953	0.042957	F_All:189	FBgn0039690	CG1969
FBgn0039712;A3:3R:29860635-29860707:29860614-29860707:-	-0.350931	0.035964	F_All:189	FBgn0039712	CG15514
FBgn0039849;AF:3R:31461968-31462035:31462178:31461968-31462396:31462467:-	0.414517	0.0516983	F_All:189	FBgn0039849	CG11334
FBgn0039849;AF:3R:31461968-31462035:31462178:31461968-31462830:31463037:-	0.221704	0.0516983	F_All:189	FBgn0039849	CG11334
FBgn0040207;A3:X:16268205-16268274:16268202-16268274:-	-0.471905	0.0504496	F_All:189	FBgn0040207	kat80
FBgn0040281;A3:3L:1197313-1197509:1197313-1197530:+	-0.841583	0.0549451	F_All:189	FBgn0040281	Aplip1
FBgn0040285;RI:X:15446179:15446834-15446904:15447830:-	-0.283117	0.0509491	F_All:189	FBgn0040285	Scamp
FBgn0043456;A3:2L:10007178-10007252:10007178-10007255:+	-0.47221	0.017982	F_All:189	FBgn0043456	CG4747
FBgn0043841;A5:2L:12421829-12423323:12421829-12423334:-	-0.317176	0.042957	F_All:189	FBgn0043841	vir-1
FBgn0046214;A5:3R:25123483-25123632:25123479-25123632:+	0.152245	0.047952	F_All:189	FBgn0046214	vig2
FBgn0050104;A5:2R:17485131-17490937:17485029-17490937:+	-0.458321	0.017982	F_All:189	FBgn0050104	NT5E-2
FBgn0050118;RI:2R:18430737:18430885-18431173:18431357:-	-0.492284	0.043956	F_All:189	FBgn0050118	CG30118
FBgn0050392;RI:2R:21290914:21290970-21291032:21291581:-	-0.360856	0.0344655	F_All:189	FBgn0050392	CG30392
FBgn0051547;AF:3R:5498870-5498943:5499014:5498870-5502037:5502702:-	0.585027	0.0204795	F_All:189	FBgn0051547	CG31547
FBgn0051908;RI:2L:7026724:7026981-7027194:7027287:-	-0.208484	0.0354645	F_All:189	FBgn0051908	CG31908
FBgn0051955;A5:2L:3712445-3712498:3712445-3712768:-	-0.666667	0.0364635	F_All:189	FBgn0051955	CG31955
FBgn0052404;A5:3L:6142187-6142249:6142187-6142253:-	0.25624	0.0354645	F_All:189	FBgn0052404	Cpr65Aw
FBgn0052694;A3:X:10004759-10005154:10004759-10005169:+	1	0	F_All:189	FBgn0052694	CG32694
FBgn0053170;AF:3L:22864842:22864925-22865771:22865486:22865696-22865771:+	-0.393352	0.02997	F_All:189	FBgn0053170	CG33170
FBgn0061492;RI:3L:6094987:6095017-6095113:6095343:+	0.361296	0.044955	F_All:189	FBgn0061492	loj
FBgn0085261;RI:2R:12164909:12165493-12165623:12165739:-	-0.131889	0.045954	F_All:189	FBgn0085261	CG34232
FBgn0085280;AF:3L:17671622:17671677-17673651:17671796:17672011-17673651:+	-0.512618	0.0264735	F_All:189	FBgn0085280	CG34251
FBgn0086254;SE:3L:11620665-11620923:11621103-11621214:-	0.378281	0.00899101	F_All:189	FBgn0086254	CG6084
FBgn0086358;AF:2R:19292529:19292860-19299170:19298243:19298630-19299170:+	-0.294707	0.033966	F_All:189	FBgn0086358	Tab2
FBgn0086442;AF:2L:19034641:19035000-19035761:19035500:19035697-19035761:+	0.542755	0.045954	F_All:189	FBgn0086442	mib2
FBgn0250907;A3:2L:23016104-23025170:23016090-23025170:-	0.640152	0.018981	F_All:189	FBgn0250907	Cht3
FBgn0250907;AF:2L:23025224-23025289:23025419:23025224-23025855:23025915:-	0.619478	0.018981	F_All:189	FBgn0250907	Cht3
FBgn0259749;AF:2L:6471714-6471961:6472072:6471714-6473631:6473904:-	0.30071	0.038961	F_All:189	FBgn0259749	mmy
FBgn0259896;AF:2L:13975879-13975978:13976254:13975879-13976477:13976769:-	-0.588104	0.0314685	F_All:189	FBgn0259896	NimC1
FBgn0260386;SE:3R:8250570-8257377:8257499-8258391:+	-0.615601	0.0524476	F_All:189	FBgn0260386	mtg
FBgn0260635;AF:3L:16040065-16040438:16040535:16040065-16042407:16042570:-	0.427671	0.0499501	F_All:189	FBgn0260635	Diap1
FBgn0260635;AF:3L:16040065-16042407:16042570:16040065-16046485:16046846:-	-0.310577	0.0499501	F_All:189	FBgn0260635	Diap1
FBgn0261258;A3:3L:21420362-21420441:21420362-21420465:+	-0.312143	0.0404595	F_All:189	FBgn0261258	rgn
FBgn0261258;SE:3L:21383084-21411530:21411578-21419607:+	0.526194	0.028971	F_All:189	FBgn0261258	rgn
FBgn0261261;SE:3R:5707941-5708021:5708182-5708499:+	-0.548711	0.0314685	F_All:189	FBgn0261261	plx
FBgn0261277;AF:X:11153360-11153488:11153574:11153360-11153617:11153802:-	0.460759	0.0354645	F_All:189	FBgn0261277	rtv
FBgn0261341;MX:3L:19691958-19692265:19692377-19692983:19691958-19692721:19692851-19692983:-	-0.207766	0.024975	F_All:189	FBgn0261341	verm
FBgn0263006;AF:2R:23932814-23933259:23933444:23932814-23935580:23935680:-	-0.743168	0.014985	F_All:189	FBgn0263006	Ca-P60A
FBgn0263006;AF:2R:23932814-23935580:23935680:23932814-23935825:23935884:-	0.514633	0.034965	F_All:189	FBgn0263006	Ca-P60A
FBgn0264270;A3:X:7088767-7091674:7088749-7091674:-	-0.635944	0.0374625	F_All:189	FBgn0264270	Sxl
FBgn0264489;A3:3L:9830785-9832196:9830785-9832199:+	-0.350754	0.0428143	F_All:189	FBgn0264489	CG43897
FBgn0264489;A3:3L:9831440-9832196:9831440-9832199:+	-0.608975	0	F_All:189	FBgn0264489	CG43897
FBgn0264489;A3:3L:9831440-9832196:9831440-9832202:+	-0.441461	0.041625	F_All:189	FBgn0264489	CG43897
FBgn0264489;A5:3L:9813927-9820280:9813922-9820280:+	0.804393	0	F_All:189	FBgn0264489	CG43897
FBgn0264489;A5:3L:9813961-9820280:9813922-9820280:+	0.441461	0.041625	F_All:189	FBgn0264489	CG43897
FBgn0264489;A5:3L:9813961-9820280:9813927-9820280:+	-0.721895	0.041625	F_All:189	FBgn0264489	CG43897
FBgn0264489;SE:3L:9830785-9831000:9831440-9832199:+	0.325431	0.041625	F_All:189	FBgn0264489	CG43897
FBgn0265045;SE:2R:15947606-15948005:15948710-15948808:-	-0.512396	0.0454545	F_All:189	FBgn0265045	Strn-Mlck
FBgn0265177;A5:2R:16196602-16196692:16196572-16196692:+	-0.298294	0.00499501	F_All:189	FBgn0265177	CG44242
FBgn0265185;SE:2R:12951349-12951846:12951878-12952173:-	0.414596	0.011988	F_All:189	FBgn0265185	CG44250
FBgn0265767;AF:X:23023317:23023431-23030190:23028438:23028597-23030190:+	-1	0	F_All:189	FBgn0265767	zyd
FBgn0266375;A5:X:13321478-13325772:13321354-13325772:+	-0.713944	0.0294705	F_All:189	FBgn0266375	IP3K2
FBgn0267790;SE:3R:9507386-9508291:9508429-9509436:-	-0.387306	0.014985	F_All:189	FBgn0267790	rump
FBgn0000565;RI:3L:15512172:15512353-15512476:15512736:+	0.610545	0.0124875	F_New_Sex_Specif.:101	FBgn0000565	Eip71CD
FBgn0000581;AF:2R:11452189:11452383-11453393:11452769:11452880-11453393:+	-0.482625	0.0504496	F_New_Sex_Specif.:101	FBgn0000581	E(Pc)
FBgn0001978;A3:2L:15114213-15114300:15114213-15114312:+	-0.333333	0.0414585	F_New_Sex_Specif.:101	FBgn0001978	stc
FBgn0003660;A3:2R:10251213-10251928:10251144-10251928:-	-0.172773	0.032967	F_New_Sex_Specif.:101	FBgn0003660	Syb
FBgn0003660;SE:2R:10249827-10250369:10250586-10250879:-	-0.150337	0.032967	F_New_Sex_Specif.:101	FBgn0003660	Syb
FBgn0003890;MX:3R:27969191-27969383:27969550-27972921:27969191-27969660:27969827-27972921:-	0.2407	0.0334665	F_New_Sex_Specif.:101	FBgn0003890	betaTub97EF
FBgn0003896;RI:2L:18859507:18860913-18860977:18861205:-	-1	0	F_New_Sex_Specif.:101	FBgn0003896	tup
FBgn0004237;AL:3R:13656846:13657125-13658462:13657324:13658297-13658462:-	0.435652	0.035964	F_New_Sex_Specif.:101	FBgn0004237	Hrb87F
FBgn0004237;AL:3R:13656846:13657125-13658462:13657795:13658297-13658462:-	0.430819	0.035964	F_New_Sex_Specif.:101	FBgn0004237	Hrb87F
FBgn0004362;A5:2R:21713434-21715406:21713387-21715406:+	-0.320013	0.0131119	F_New_Sex_Specif.:101	FBgn0004362	HmgD
FBgn0004362;AF:2R:21701458:21702064-21715406:21713356:21713434-21715406:+	0.378525	0.0131119	F_New_Sex_Specif.:101	FBgn0004362	HmgD
FBgn0004362;AF:2R:21701458:21702064-21715406:21714136:21714166-21715406:+	0.695929	0.0131119	F_New_Sex_Specif.:101	FBgn0004362	HmgD
FBgn0004362;AF:2R:21713356:21713387-21715406:21714136:21714166-21715406:+	0.27903	0.0131119	F_New_Sex_Specif.:101	FBgn0004362	HmgD
FBgn0004828;AF:X:9154685-9154785:9155012:9154685-9156580:9156669:-	-0.208285	0.0529471	F_New_Sex_Specif.:101	FBgn0004828	His3.3B
FBgn0010246;AF:3L:1324563:1324629-1325995:1325117:1325260-1325995:+	0.66165	0.00799201	F_New_Sex_Specif.:101	FBgn0010246	Myo61F
FBgn0011202;AF:2L:20758144:20758663-20760525:20760300:20760457-20760525:+	0.542389	0.044955	F_New_Sex_Specif.:101	FBgn0011202	dia
FBgn0011300;MX:2R:8954851-8955713:8955858-8959107:8954851-8957029:8957156-8959107:+	-0.505343	0.0529471	F_New_Sex_Specif.:101	FBgn0011300	babo
FBgn0011584;AF:2L:10009381:10009536-10010737:10010354:10010557-10010737:+	-0.18591	0.0424575	F_New_Sex_Specif.:101	FBgn0011584	Trp1
FBgn0013272;RI:2R:22317662:22317737-22317882:22317954:+	-0.477045	0.0509491	F_New_Sex_Specif.:101	FBgn0013272	Gp150
FBgn0014859;A5:2L:20690456-20713037:20690456-20713599:-	1	0	F_New_Sex_Specif.:101	FBgn0014859	Hr38
FBgn0015772;AL:2L:18957732:18960680-18962885:18960927:18962791-18962885:-	0.627162	0.0514486	F_New_Sex_Specif.:101	FBgn0015772	Nak
FBgn0016078;AL:2R:9400531:9401148-9402409:9402080:9402234-9402409:-	-0.346742	0.023976	F_New_Sex_Specif.:101	FBgn0016078	wun
FBgn0020251;SE:3L:6496481-6505083:6505119-6523030:+	-0.944906	0.0549451	F_New_Sex_Specif.:101	FBgn0020251	sfl
FBgn0020304;AF:2L:837378-842614:842943:837378-849899:851071:-	0.307446	0.035964	F_New_Sex_Specif.:101	FBgn0020304	drongo
FBgn0021979;A5:2R:23067841-23067947:23067838-23067947:+	-0.15886	0.0539461	F_New_Sex_Specif.:101	FBgn0021979	l(2)k09913
FBgn0022343;A3:2R:24938842-24938956:24938842-24938974:+	0.198729	0.0509491	F_New_Sex_Specif.:101	FBgn0022343	CG3760
FBgn0023023;MX:3R:5575925-5576175:5576413-5577593:5575925-5577036:5577259-5577593:+	0.601562	0.038961	F_New_Sex_Specif.:101	FBgn0023023	CRMP
FBgn0024248;A5:2L:10246039-10246900:10246039-10247025:-	0.755082	0.0254745	F_New_Sex_Specif.:101	FBgn0024248	chico
FBgn0027836;AF:2R:18171319-18171393:18171470:18171319-18172438:18172607:-	-0.206379	0.040959	F_New_Sex_Specif.:101	FBgn0027836	Dgp-1
FBgn0028411;A3:2R:23811737-23811795:23811724-23811795:-	0.504619	0.015984	F_New_Sex_Specif.:101	FBgn0028411	Nxt1
FBgn0029914;RI:X:6849770:6851052-6851300:6851884:+	0.472688	0.0404595	F_New_Sex_Specif.:101	FBgn0029914	CG4558
FBgn0029971;A3:X:7893490-7893750:7893416-7893750:-	-0.320767	0.0104895	F_New_Sex_Specif.:101	FBgn0029971	CG18624
FBgn0030065;AF:X:8838323:8838484-8867549:8864109:8864258-8867549:+	-0.567519	0.0474525	F_New_Sex_Specif.:101	FBgn0030065	CG12075
FBgn0030065;AF:X:8838323:8838484-8867549:8864109:8864273-8867549:+	-0.666667	0.0474525	F_New_Sex_Specif.:101	FBgn0030065	CG12075
FBgn0030474;RI:X:13338452:13340427-13340518:13341009:+	-0.666667	0.031968	F_New_Sex_Specif.:101	FBgn0030474	CG15747
FBgn0030685;A3:X:15754799-15755104:15754772-15755104:-	-0.442559	0.0529471	F_New_Sex_Specif.:101	FBgn0030685	Graf
FBgn0031012;AF:X:19304094-19305294:19305299:19304094-19307639:19307925:-	-0.465137	0.027972	F_New_Sex_Specif.:101	FBgn0031012	CG8051
FBgn0031115;A5:X:20427994-20428051:20427994-20428064:-	0.40879	0.0549451	F_New_Sex_Specif.:101	FBgn0031115	CG11710
FBgn0031117;SE:X:20467770-20468207:20468412-20468547:+	0.747635	0.0254745	F_New_Sex_Specif.:101	FBgn0031117	GstT3
FBgn0031384;AF:2L:2009859:2010313-2026768:2024012:2024265-2026768:+	-1	0	F_New_Sex_Specif.:101	FBgn0031384	CG4238
FBgn0031453;A5:2L:2752840-2753372:2752837-2753372:+	-0.0862531	0.0464535	F_New_Sex_Specif.:101	FBgn0031453	Bacc
FBgn0033092;AF:2R:6675822:6675912-6691698:6680146:6680730-6691698:+	-0.54367	0.0234765	F_New_Sex_Specif.:101	FBgn0033092	CG9422
FBgn0033115;AF:2R:6885552:6885659-6886514:6886393:6886424-6886514:+	-0.666667	0.0434565	F_New_Sex_Specif.:101	FBgn0033115	Spn42De
FBgn0033339;A3:2R:8895644-8895951:8895644-8895954:+	-0.329515	0.036963	F_New_Sex_Specif.:101	FBgn0033339	Sec31
FBgn0033669;AF:2R:11968479-11968740:11968850:11968479-11970026:11970115:-	-0.893274	0.0034965	F_New_Sex_Specif.:101	FBgn0033669	PI31
FBgn0034286;A3:2R:17977793-17978788:17977790-17978788:-	1	0	F_New_Sex_Specif.:101	FBgn0034286	dpr13
FBgn0034381;A3:2R:18728786-18728843:18728746-18728843:-	1	0	F_New_Sex_Specif.:101	FBgn0034381	List
FBgn0034618;AF:2R:21312674:21312740-21314424:21313367:21313716-21314424:+	0.917816	0.02997	F_New_Sex_Specif.:101	FBgn0034618	CG9485
FBgn0034708;A5:2R:22186320-22186517:22186094-22186517:+	0.49341	0.0174825	F_New_Sex_Specif.:101	FBgn0034708	Vps35
FBgn0035397;AF:3L:3073207:3073478-3083733:3077929:3078044-3083733:+	0.618532	0.0454545	F_New_Sex_Specif.:101	FBgn0035397	CG11486
FBgn0035397;AF:3L:3077929:3078044-3083733:3081978:3082227-3083733:+	-0.849231	0.0314685	F_New_Sex_Specif.:101	FBgn0035397	CG11486
FBgn0035431;AF:3L:3300883-3300989:3301142:3300883-3303048:3303112:-	0.43088	0.0539461	F_New_Sex_Specif.:101	FBgn0035431	CG14968
FBgn0035695;AF:3L:6238781-6238895:6238991:6238781-6239273:6240068:-	-1	0	F_New_Sex_Specif.:101	FBgn0035695	CG10226
FBgn0035849;AF:3L:8185042-8185567:8185670:8185042-8186179:8186671:-	0.448371	0.0314685	F_New_Sex_Specif.:101	FBgn0035849	ERR
FBgn0035987;A3:3L:9411982-9412155:9411982-9413203:+	0.252969	0.036963	F_New_Sex_Specif.:101	FBgn0035987	CG3689
FBgn0036101;A3:3L:10695415-10695629:10695367-10695629:-	-0.784189	0.021978	F_New_Sex_Specif.:101	FBgn0036101	NijA
FBgn0036337;AF:3L:13021557-13021628:13021685:13021557-13022438:13022688:-	0.249174	0.022977	F_New_Sex_Specif.:101	FBgn0036337	AdenoK
FBgn0036752;A3:3L:17754425-17764062:17754421-17764062:-	0.798986	0.020979	F_New_Sex_Specif.:101	FBgn0036752	Adgf-A
FBgn0036862;AF:3L:19285413-19288392:19288569:19285413-19291480:19291672:-	-0.51078	0.0184815	F_New_Sex_Specif.:101	FBgn0036862	Gbs-76A
FBgn0036862;AF:3L:19285413-19288392:19288569:19285413-19291480:19292766:-	-0.779709	0.0184815	F_New_Sex_Specif.:101	FBgn0036862	Gbs-76A
FBgn0036945;RI:3L:20188522:20188614-20188676:20188762:+	-0.247425	0.0274725	F_New_Sex_Specif.:101	FBgn0036945	Ssk
FBgn0036993;AF:3L:20442419:20442469-20445948:20445158:20445293-20445948:+	-0.495869	0.0539461	F_New_Sex_Specif.:101	FBgn0036993	CG5910
FBgn0037386;AF:3R:5831639:5831851-5835839:5835029:5835351-5835839:+	0.658618	0.0314685	F_New_Sex_Specif.:101	FBgn0037386	CG1208
FBgn0037659;A5:3R:9052627-9053536:9052575-9053536:+	-0.636799	0.0499501	F_New_Sex_Specif.:101	FBgn0037659	Kdm2
FBgn0038220;AF:3R:14289274:14289449-14290730:14290401:14290460-14290730:+	-0.517726	0.0294705	F_New_Sex_Specif.:101	FBgn0038220	CG12207
FBgn0038476;AF:3R:17080244:17080356-17082664:17081946:17082027-17082664:+	-0.333333	0.0414585	F_New_Sex_Specif.:101	FBgn0038476	kuk
FBgn0039321;A5:3R:25307909-25308181:25307909-25308311:-	0.537744	0.0184815	F_New_Sex_Specif.:101	FBgn0039321	CG10550
FBgn0039406;A3:3R:26059054-26059235:26059051-26059235:-	-0.167312	0.036963	F_New_Sex_Specif.:101	FBgn0039406	RpL34a
FBgn0039690;A5:3R:29740419-29740568:29740407-29740568:+	0.313953	0.042957	F_New_Sex_Specif.:101	FBgn0039690	CG1969
FBgn0039712;A3:3R:29860635-29860707:29860614-29860707:-	-0.350931	0.035964	F_New_Sex_Specif.:101	FBgn0039712	CG15514
FBgn0039849;AF:3R:31461968-31462035:31462178:31461968-31462396:31462467:-	0.414517	0.0516983	F_New_Sex_Specif.:101	FBgn0039849	CG11334
FBgn0039849;AF:3R:31461968-31462035:31462178:31461968-31462830:31463037:-	0.221704	0.0516983	F_New_Sex_Specif.:101	FBgn0039849	CG11334
FBgn0040207;A3:X:16268205-16268274:16268202-16268274:-	-0.471905	0.0504496	F_New_Sex_Specif.:101	FBgn0040207	kat80
FBgn0040281;A3:3L:1197313-1197509:1197313-1197530:+	-0.841583	0.0549451	F_New_Sex_Specif.:101	FBgn0040281	Aplip1
FBgn0040285;RI:X:15446179:15446834-15446904:15447830:-	-0.283117	0.0509491	F_New_Sex_Specif.:101	FBgn0040285	Scamp
FBgn0043841;A5:2L:12421829-12423323:12421829-12423334:-	-0.317176	0.042957	F_New_Sex_Specif.:101	FBgn0043841	vir-1
FBgn0050392;RI:2R:21290914:21290970-21291032:21291581:-	-0.360856	0.0344655	F_New_Sex_Specif.:101	FBgn0050392	CG30392
FBgn0051955;A5:2L:3712445-3712498:3712445-3712768:-	-0.666667	0.0364635	F_New_Sex_Specif.:101	FBgn0051955	CG31955
FBgn0052694;A3:X:10004759-10005154:10004759-10005169:+	1	0	F_New_Sex_Specif.:101	FBgn0052694	CG32694
FBgn0061492;RI:3L:6094987:6095017-6095113:6095343:+	0.361296	0.044955	F_New_Sex_Specif.:101	FBgn0061492	loj
FBgn0085261;RI:2R:12164909:12165493-12165623:12165739:-	-0.131889	0.045954	F_New_Sex_Specif.:101	FBgn0085261	CG34232
FBgn0085280;AF:3L:17671622:17671677-17673651:17671796:17672011-17673651:+	-0.512618	0.0264735	F_New_Sex_Specif.:101	FBgn0085280	CG34251
FBgn0086358;AF:2R:19292529:19292860-19299170:19298243:19298630-19299170:+	-0.294707	0.033966	F_New_Sex_Specif.:101	FBgn0086358	Tab2
FBgn0086442;AF:2L:19034641:19035000-19035761:19035500:19035697-19035761:+	0.542755	0.045954	F_New_Sex_Specif.:101	FBgn0086442	mib2
FBgn0250907;A3:2L:23016104-23025170:23016090-23025170:-	0.640152	0.018981	F_New_Sex_Specif.:101	FBgn0250907	Cht3
FBgn0250907;AF:2L:23025224-23025289:23025419:23025224-23025855:23025915:-	0.619478	0.018981	F_New_Sex_Specif.:101	FBgn0250907	Cht3
FBgn0259749;AF:2L:6471714-6471961:6472072:6471714-6473631:6473904:-	0.30071	0.038961	F_New_Sex_Specif.:101	FBgn0259749	mmy
FBgn0260635;AF:3L:16040065-16040438:16040535:16040065-16042407:16042570:-	0.427671	0.0499501	F_New_Sex_Specif.:101	FBgn0260635	Diap1
FBgn0260635;AF:3L:16040065-16042407:16042570:16040065-16046485:16046846:-	-0.310577	0.0499501	F_New_Sex_Specif.:101	FBgn0260635	Diap1
FBgn0261258;A3:3L:21420362-21420441:21420362-21420465:+	-0.312143	0.0404595	F_New_Sex_Specif.:101	FBgn0261258	rgn
FBgn0261258;SE:3L:21383084-21411530:21411578-21419607:+	0.526194	0.028971	F_New_Sex_Specif.:101	FBgn0261258	rgn
FBgn0261261;SE:3R:5707941-5708021:5708182-5708499:+	-0.548711	0.0314685	F_New_Sex_Specif.:101	FBgn0261261	plx
FBgn0261277;AF:X:11153360-11153488:11153574:11153360-11153617:11153802:-	0.460759	0.0354645	F_New_Sex_Specif.:101	FBgn0261277	rtv
FBgn0261341;MX:3L:19691958-19692265:19692377-19692983:19691958-19692721:19692851-19692983:-	-0.207766	0.024975	F_New_Sex_Specif.:101	FBgn0261341	verm
FBgn0264270;A3:X:7088767-7091674:7088749-7091674:-	-0.635944	0.0374625	F_New_Sex_Specif.:101	FBgn0264270	Sxl
FBgn0264489;A3:3L:9831440-9832196:9831440-9832202:+	-0.441461	0.041625	F_New_Sex_Specif.:101	FBgn0264489	CG43897
FBgn0264489;A5:3L:9813961-9820280:9813922-9820280:+	0.441461	0.041625	F_New_Sex_Specif.:101	FBgn0264489	CG43897
FBgn0265185;SE:2R:12951349-12951846:12951878-12952173:-	0.414596	0.011988	F_New_Sex_Specif.:101	FBgn0265185	CG44250
FBgn0265767;AF:X:23023317:23023431-23030190:23028438:23028597-23030190:+	-1	0	F_New_Sex_Specif.:101	FBgn0265767	zyd
FBgn0266375;A5:X:13321478-13325772:13321354-13325772:+	-0.713944	0.0294705	F_New_Sex_Specif.:101	FBgn0266375	IP3K2
FBgn0267790;SE:3R:9507386-9508291:9508429-9509436:-	-0.387306	0.014985	F_New_Sex_Specif.:101	FBgn0267790	rump
FBgn0000639;A5:3L:14097808-14097869:14097808-14097875:-	-0.620944	0.0014985	F_Non_Sex_Specif.:50	FBgn0000639	Fbp1
FBgn0000667;AF:X:2035198-2036407:2036466:2035198-2042047:2042311:-	0.394923	0.0224775	F_Non_Sex_Specif.:50	FBgn0000667	Actn
FBgn0001311;MX:3R:5379688-5380354:5380530-5381322:5379688-5380645:5380821-5381322:-	0.682915	0.002997	F_Non_Sex_Specif.:50	FBgn0001311	kkv
FBgn0003607;RI:2L:8210730:8210861-8210979:8211122:-	0.365656	0.001998	F_Non_Sex_Specif.:50	FBgn0003607	Su(var)205
FBgn0004577;A3:3R:17025575-17025633:17025575-17025639:+	-0.584992	0.037962	F_Non_Sex_Specif.:50	FBgn0004577	Pxd
FBgn0005671;A3:3R:12627575-12627640:12627561-12627640:-	-0.211724	0.023976	F_Non_Sex_Specif.:50	FBgn0005671	Vha55
FBgn0005672;AF:2L:19569226-19572500:19572610:19569226-19577186:19577315:-	-0.666667	0.00799201	F_Non_Sex_Specif.:50	FBgn0005672	spi
FBgn0010225;A5:3R:4236939-4237625:4236804-4237625:+	-0.277028	0.02997	F_Non_Sex_Specif.:50	FBgn0010225	Gel
FBgn0010246;AF:3L:1318480:1318769-1325995:1324563:1324629-1325995:+	-0.886434	0.00799201	F_Non_Sex_Specif.:50	FBgn0010246	Myo61F
FBgn0011708;RI:2L:16307346:16307389-16307483:16308329:+	-0.32625	0.0204795	F_Non_Sex_Specif.:50	FBgn0011708	Syx5
FBgn0014391;SE:X:15848004-15848298:15848347-15848886:-	0.250584	0.003996	F_Non_Sex_Specif.:50	FBgn0014391	sun
FBgn0014863;AF:3R:7115838-7116652:7116716:7115838-7117651:7117732:-	0.13834	0.023976	F_Non_Sex_Specif.:50	FBgn0014863	Mlp84B
FBgn0020235;A3:3R:29748769-29748824:29748748-29748824:-	-0.232516	0.024975	F_Non_Sex_Specif.:50	FBgn0020235	ATPsyn-gamma
FBgn0023541;A5:X:2174920-2175065:2174920-2175074:-	-0.828271	0.0354645	F_Non_Sex_Specif.:50	FBgn0023541	Cyp4d14
FBgn0024947;AF:2L:2882833-2882920:2883126:2882833-2884993:2885214:-	-0.548987	0.0224775	F_Non_Sex_Specif.:50	FBgn0024947	NTPase
FBgn0026061;AF:3L:16565867-16572274:16572401:16565867-16573266:16573334:-	0.666667	0.043956	F_Non_Sex_Specif.:50	FBgn0026061	Mipp1
FBgn0026718;AF:2L:8451004-8451454:8451515:8451004-8463627:8463994:-	-0.633661	0.034965	F_Non_Sex_Specif.:50	FBgn0026718	fu12
FBgn0027570;SE:3R:4721390-4722608:4722640-4722774:-	0.484189	0.00749251	F_Non_Sex_Specif.:50	FBgn0027570	Nep2
FBgn0029167;A3:3L:13847186-13847248:13847186-13847251:+	0.570573	0.032967	F_Non_Sex_Specif.:50	FBgn0029167	Hml
FBgn0030724;RI:X:16073403:16073431-16073510:16073568:-	0.339501	0.020979	F_Non_Sex_Specif.:50	FBgn0030724	Nipsnap
FBgn0031117;AF:X:20467640:20467770-20468547:20468385:20468412-20468547:+	-0.344469	0.022977	F_Non_Sex_Specif.:50	FBgn0031117	GstT3
FBgn0031298;A3:2L:1082665-1082789:1082665-1082792:+	-0.222208	0.027972	F_Non_Sex_Specif.:50	FBgn0031298	Atg4a
FBgn0031417;A5:2L:2370988-2371042:2370988-2371048:-	0.67351	0.0184815	F_Non_Sex_Specif.:50	FBgn0031417	CG3597
FBgn0031737;AL:2L:5762553:5763368-5765961:5763460:5764271-5765961:-	0.314612	0.002997	F_Non_Sex_Specif.:50	FBgn0031737	obst-E
FBgn0032170;RI:2L:9957295:9957329-9957429:9957900:+	-0.609167	0.023976	F_Non_Sex_Specif.:50	FBgn0032170	CG4658
FBgn0032773;SE:2L:19385363-19385670:19385705-19385780:-	-0.5599	0	F_Non_Sex_Specif.:50	FBgn0032773	fon
FBgn0032774;AF:2L:19388569-19389765:19389799:19388569-19389927:19390075:-	0.33486	0.011988	F_Non_Sex_Specif.:50	FBgn0032774	CG17549
FBgn0032774;AF:2L:19388569-19389765:19389799:19388569-19389936:19390075:-	0.158077	0.044955	F_Non_Sex_Specif.:50	FBgn0032774	CG17549
FBgn0033271;AF:2R:8160929-8161033:8161235:8160929-8161411:8161565:-	0.666667	0.0334665	F_Non_Sex_Specif.:50	FBgn0033271	CG8708
FBgn0033446;AF:2R:9812664-9812724:9812774:9812664-9819840:9820053:-	0.101466	0.026973	F_Non_Sex_Specif.:50	FBgn0033446	CG1648
FBgn0033551;AF:2R:10813405:10813464-10814031:10813549:10813736-10814031:+	0.742787	0.025974	F_Non_Sex_Specif.:50	FBgn0033551	CG7222
FBgn0035499;AF:3L:4115646-4115723:4115752:4115646-4122156:4122388:-	-0.289774	0.003996	F_Non_Sex_Specif.:50	FBgn0035499	Chd64
FBgn0035844;RI:3L:8142612:8142818-8143408:8144710:-	-0.301121	0.0194805	F_Non_Sex_Specif.:50	FBgn0035844	CG13676
FBgn0036537;A3:3L:15834883-15835194:15834879-15835194:-	0.186243	0.0514486	F_Non_Sex_Specif.:50	FBgn0036537	CG18081
FBgn0037697;AF:3R:9458772-9459128:9459176:9458772-9460271:9460652:-	0.426359	0.033966	F_Non_Sex_Specif.:50	FBgn0037697	GstZ2
FBgn0038079;AF:3R:12695129:12695406-12696123:12695998:12696047-12696123:+	-0.5768	0.023976	F_Non_Sex_Specif.:50	FBgn0038079	NijC
FBgn0038829;AL:3R:20819129:20819494-20820650:20819626:20820443-20820650:-	0.393007	0.00599401	F_Non_Sex_Specif.:50	FBgn0038829	CG17271
FBgn0050118;RI:2R:18430737:18430885-18431173:18431357:-	-0.492284	0.043956	F_Non_Sex_Specif.:50	FBgn0050118	CG30118
FBgn0051547;AF:3R:5498870-5498943:5499014:5498870-5502037:5502702:-	0.585027	0.0204795	F_Non_Sex_Specif.:50	FBgn0051547	CG31547
FBgn0052404;A5:3L:6142187-6142249:6142187-6142253:-	0.25624	0.0354645	F_Non_Sex_Specif.:50	FBgn0052404	Cpr65Aw
FBgn0259896;AF:2L:13975879-13975978:13976254:13975879-13976477:13976769:-	-0.588104	0.0314685	F_Non_Sex_Specif.:50	FBgn0259896	NimC1
FBgn0263006;AF:2R:23932814-23933259:23933444:23932814-23935580:23935680:-	-0.743168	0.014985	F_Non_Sex_Specif.:50	FBgn0263006	Ca-P60A
FBgn0263006;AF:2R:23932814-23935580:23935680:23932814-23935825:23935884:-	0.514633	0.034965	F_Non_Sex_Specif.:50	FBgn0263006	Ca-P60A
FBgn0264489;A3:3L:9830785-9832196:9830785-9832199:+	-0.350754	0.0428143	F_Non_Sex_Specif.:50	FBgn0264489	CG43897
FBgn0264489;A3:3L:9831440-9832196:9831440-9832199:+	-0.608975	0	F_Non_Sex_Specif.:50	FBgn0264489	CG43897
FBgn0264489;A5:3L:9813927-9820280:9813922-9820280:+	0.804393	0	F_Non_Sex_Specif.:50	FBgn0264489	CG43897
FBgn0264489;A5:3L:9813961-9820280:9813927-9820280:+	-0.721895	0.041625	F_Non_Sex_Specif.:50	FBgn0264489	CG43897
FBgn0264489;SE:3L:9830785-9831000:9831440-9832199:+	0.325431	0.041625	F_Non_Sex_Specif.:50	FBgn0264489	CG43897
FBgn0265045;SE:2R:15947606-15948005:15948710-15948808:-	-0.512396	0.0454545	F_Non_Sex_Specif.:50	FBgn0265045	Strn-Mlck
FBgn0265177;A5:2R:16196602-16196692:16196572-16196692:+	-0.298294	0.00499501	F_Non_Sex_Specif.:50	FBgn0265177	CG44242
FBgn0001105;A3:X:15860322-15861140:15860322-15861224:+	0.408582	0.0314685	F_Sex_Specif.:38	FBgn0001105	Gbeta13F
FBgn0001280;A5:3R:30039406-30039473:30039406-30039477:-	-0.187579	0.0544456	F_Sex_Specif.:38	FBgn0001280	janA
FBgn0001961;RI:2L:13829346:13829643-13829710:13829741:-	-0.124085	0.0304695	F_Sex_Specif.:38	FBgn0001961	Arpc1
FBgn0003676;RI:3R:22491259:22491351-22491416:22491439:-	0.289647	0.0144855	F_Sex_Specif.:38	FBgn0003676	T-cp1
FBgn0004108;AF:3L:16766072:16766540-16773714:16773520:16773642-16773714:+	-0.429739	0.0544456	F_Sex_Specif.:38	FBgn0004108	Nrt
FBgn0010621;AF:2R:12174802:12175028-12175737:12175096:12175128-12175737:+	-0.19288	0.031968	F_Sex_Specif.:38	FBgn0010621	Cct5
FBgn0010622;RI:2R:23061420:23061594-23061683:23062593:-	0.622316	0.00949051	F_Sex_Specif.:38	FBgn0010622	l(2)06496
FBgn0014184;AF:2R:12168203-12170924:12171285:12168203-12174091:12174264:-	0.315231	0.0134865	F_Sex_Specif.:38	FBgn0014184	Oda
FBgn0015477;A3:2R:9175934-9176091:9175931-9176091:-	-0.913195	0.026973	F_Sex_Specif.:38	FBgn0015477	Rme-8
FBgn0016120;A5:3R:19095074-19095397:19095021-19095397:+	-0.0990508	0.027972	F_Sex_Specif.:38	FBgn0016120	ATPsyn-d
FBgn0024733;A5:3L:23095305-23095426:23095305-23095437:-	0.0546419	0.0314685	F_Sex_Specif.:38	FBgn0024733	RpL10
FBgn0025630;A5:X:2072725-2073134:2072697-2073134:+	-0.666667	0.0294705	F_Sex_Specif.:38	FBgn0025630	CG4061
FBgn0029676;RI:X:3790042:3790070-3790130:3790336:+	-0.56441	0.0104895	F_Sex_Specif.:38	FBgn0029676	HIP-R
FBgn0031384;AF:2L:2017540:2017851-2026768:2024012:2024265-2026768:+	-1	0	F_Sex_Specif.:38	FBgn0031384	CG4238
FBgn0031758;A3:2L:5970559-5970629:5970559-5970639:+	-0.666667	0.046953	F_Sex_Specif.:38	FBgn0031758	Ucp4B
FBgn0032305;A5:2L:10842273-10842381:10842273-10842385:-	0.377164	0.0384615	F_Sex_Specif.:38	FBgn0032305	CG6700
FBgn0032979;A3:2L:22167253-22167303:22167238-22167303:-	0.477982	0.0164835	F_Sex_Specif.:38	FBgn0032979	Clamp
FBgn0033725;A5:2R:12387517-12387913:12387427-12387913:+	0.245152	0.015984	F_Sex_Specif.:38	FBgn0033725	Cpr49Ac
FBgn0033725;SE:2R:12387517-12387913:12387939-12388300:+	0.227519	0.015984	F_Sex_Specif.:38	FBgn0033725	Cpr49Ac
FBgn0033762;A3:2R:12654058-12654111:12654058-12654126:+	-0.497771	0.040959	F_Sex_Specif.:38	FBgn0033762	ZnT49B
FBgn0033784;RI:2R:12935779:12936260-12936325:12936535:-	0.532398	0.0474525	F_Sex_Specif.:38	FBgn0033784	CG13322
FBgn0034068;A3:2R:16027278-16027337:16027263-16027337:-	0.609496	0.016983	F_Sex_Specif.:38	FBgn0034068	casp
FBgn0034246;A5:2R:17578495-17578554:17578495-17578557:-	1	0	F_Sex_Specif.:38	FBgn0034246	Dcr-2
FBgn0034962;A5:2R:24034432-24034688:24034420-24034688:+	0.508855	0.0549451	F_Sex_Specif.:38	FBgn0034962	MAN1
FBgn0035473;AF:3L:3909039-3909221:3909592:3909039-3909757:3909931:-	0.341264	0.031968	F_Sex_Specif.:38	FBgn0035473	mge
FBgn0035713;A5:3L:6751443-6752145:6751443-6752160:-	-0.333333	0.0549451	F_Sex_Specif.:38	FBgn0035713	velo
FBgn0037580;SE:3R:8344483-8344809:8345023-8345093:+	0.230502	0.0444555	F_Sex_Specif.:38	FBgn0037580	DppIII
FBgn0037680;A3:3R:9335252-9335497:9335252-9335500:+	-0.458491	0.0344655	F_Sex_Specif.:38	FBgn0037680	CG8121
FBgn0038271;RI:3R:14890231:14890261-14890334:14890426:+	-0.314206	0.0044955	F_Sex_Specif.:38	FBgn0038271	CG3731
FBgn0038811;A5:3R:20592493-20592557:20592493-20592561:-	-0.575088	0.0519481	F_Sex_Specif.:38	FBgn0038811	CG4159
FBgn0039359;A5:3R:25684516-25684959:25684516-25685018:-	-0.28078	0.0344655	F_Sex_Specif.:38	FBgn0039359	RpL27
FBgn0043456;A3:2L:10007178-10007252:10007178-10007255:+	-0.47221	0.017982	F_Sex_Specif.:38	FBgn0043456	CG4747
FBgn0046214;A5:3R:25123483-25123632:25123479-25123632:+	0.152245	0.047952	F_Sex_Specif.:38	FBgn0046214	vig2
FBgn0050104;A5:2R:17485131-17490937:17485029-17490937:+	-0.458321	0.017982	F_Sex_Specif.:38	FBgn0050104	NT5E-2
FBgn0051908;RI:2L:7026724:7026981-7027194:7027287:-	-0.208484	0.0354645	F_Sex_Specif.:38	FBgn0051908	CG31908
FBgn0053170;AF:3L:22864842:22864925-22865771:22865486:22865696-22865771:+	-0.393352	0.02997	F_Sex_Specif.:38	FBgn0053170	CG33170
FBgn0086254;SE:3L:11620665-11620923:11621103-11621214:-	0.378281	0.00899101	F_Sex_Specif.:38	FBgn0086254	CG6084
FBgn0260386;SE:3R:8250570-8257377:8257499-8258391:+	-0.615601	0.0524476	F_Sex_Specif.:38	FBgn0260386	mtg
FBgn0000639;A5:3L:14097808-14097869:14097808-14097875:-	-0.942317	0	M_All:211	FBgn0000639	Fbp1
FBgn0000667;AF:X:2035198-2036407:2036466:2035198-2042047:2042311:-	0.60211	0.013986	M_All:211	FBgn0000667	Actn
FBgn0001311;MX:3R:5379688-5380354:5380530-5381322:5379688-5380645:5380821-5381322:-	0.508848	0.025974	M_All:211	FBgn0001311	kkv
FBgn0003607;RI:2L:8210730:8210861-8210979:8211122:-	0.339005	0.00749251	M_All:211	FBgn0003607	Su(var)205
FBgn0003676;RI:3R:22491259:22491351-22491416:22491439:-	0.399034	0.0114885	M_All:211	FBgn0003676	T-cp1
FBgn0004577;A3:3R:17025575-17025633:17025575-17025639:+	-0.74937	0.028971	M_All:211	FBgn0004577	Pxd
FBgn0005671;A3:3R:12627575-12627640:12627561-12627640:-	-0.180365	0.047952	M_All:211	FBgn0005671	Vha55
FBgn0005672;AF:2L:19569226-19572500:19572610:19569226-19577186:19577315:-	0.604213	0.0262238	M_All:211	FBgn0005672	spi
FBgn0005672;SE:2L:19569226-19571572:19571767-19577186:-	0.523387	0.0262238	M_All:211	FBgn0005672	spi
FBgn0010225;A5:3R:4236939-4237625:4236804-4237625:+	-0.505082	0.017982	M_All:211	FBgn0010225	Gel
FBgn0010246;AF:3L:1318480:1318769-1325995:1324563:1324629-1325995:+	-0.631673	0.017982	M_All:211	FBgn0010246	Myo61F
FBgn0010246;AF:3L:1318480:1318769-1325995:1325117:1325260-1325995:+	-0.551771	0.0337163	M_All:211	FBgn0010246	Myo61F
FBgn0010621;AF:2R:12174802:12175028-12175737:12175096:12175128-12175737:+	-0.184501	0.0414585	M_All:211	FBgn0010621	Cct5
FBgn0011708;RI:2L:16307346:16307389-16307483:16308329:+	-0.573	0.00749251	M_All:211	FBgn0011708	Syx5
FBgn0014391;SE:X:15848004-15848298:15848347-15848886:-	0.196558	0.0104895	M_All:211	FBgn0014391	sun
FBgn0014863;AF:3R:7115838-7116652:7116716:7115838-7117651:7117732:-	0.182947	0.018981	M_All:211	FBgn0014863	Mlp84B
FBgn0020235;A3:3R:29748769-29748824:29748748-29748824:-	-0.298011	0.0124875	M_All:211	FBgn0020235	ATPsyn-gamma
FBgn0023541;A5:X:2174920-2175065:2174920-2175074:-	-0.844054	0.025974	M_All:211	FBgn0023541	Cyp4d14
FBgn0024733;A5:3L:23095305-23095426:23095305-23095437:-	0.117627	0.015984	M_All:211	FBgn0024733	RpL10
FBgn0024947;AF:2L:2882833-2882920:2883126:2882833-2884993:2885214:-	-0.693755	0.013986	M_All:211	FBgn0024947	NTPase
FBgn0026061;AF:3L:16565867-16572274:16572401:16565867-16573266:16573334:-	0.715768	0.02997	M_All:211	FBgn0026061	Mipp1
FBgn0026718;AF:2L:8451004-8451454:8451515:8451004-8463627:8463994:-	-0.715107	0.00999001	M_All:211	FBgn0026718	fu12
FBgn0027570;SE:3R:4721390-4722608:4722640-4722774:-	0.417525	0.01998	M_All:211	FBgn0027570	Nep2
FBgn0029167;A3:3L:13847186-13847248:13847186-13847251:+	0.526541	0.0534466	M_All:211	FBgn0029167	Hml
FBgn0030724;RI:X:16073403:16073431-16073510:16073568:-	0.588414	0.00799201	M_All:211	FBgn0030724	Nipsnap
FBgn0031117;AF:X:20467640:20467770-20468547:20468385:20468412-20468547:+	-0.215519	0.046953	M_All:211	FBgn0031117	GstT3
FBgn0031298;A3:2L:1082665-1082789:1082665-1082792:+	-0.266089	0.032967	M_All:211	FBgn0031298	Atg4a
FBgn0031417;A5:2L:2370988-2371042:2370988-2371048:-	0.834567	0.0234765	M_All:211	FBgn0031417	CG3597
FBgn0031737;AL:2L:5762553:5763368-5765961:5763460:5764271-5765961:-	0.193585	0.033966	M_All:211	FBgn0031737	obst-E
FBgn0032170;RI:2L:9957295:9957329-9957429:9957900:+	-0.429126	0.0264735	M_All:211	FBgn0032170	CG4658
FBgn0032305;A5:2L:10842273-10842381:10842273-10842385:-	-0.536424	0.020979	M_All:211	FBgn0032305	CG6700
FBgn0032773;SE:2L:19385363-19385670:19385705-19385780:-	-0.578078	0	M_All:211	FBgn0032773	fon
FBgn0032774;AF:2L:19388569-19389765:19389799:19388569-19389927:19390075:-	0.372865	0.01998	M_All:211	FBgn0032774	CG17549
FBgn0032774;AF:2L:19388569-19389765:19389799:19388569-19389936:19390075:-	0.194	0.043956	M_All:211	FBgn0032774	CG17549
FBgn0033271;AF:2R:8160929-8161033:8161235:8160929-8161411:8161565:-	1	0	M_All:211	FBgn0033271	CG8708
FBgn0033446;AF:2R:9812664-9812724:9812774:9812664-9819840:9820053:-	0.194554	0.014985	M_All:211	FBgn0033446	CG1648
FBgn0033551;AF:2R:10813405:10813464-10814031:10813549:10813736-10814031:+	0.723414	0.012987	M_All:211	FBgn0033551	CG7222
FBgn0033725;A5:2R:12387517-12387913:12387427-12387913:+	0.183534	0.0174825	M_All:211	FBgn0033725	Cpr49Ac
FBgn0033725;RI:2R:12388518:12388533-12388923:12389086:+	-0.171881	0.0174825	M_All:211	FBgn0033725	Cpr49Ac
FBgn0033725;SE:2R:12387427-12387913:12387939-12388300:+	0.260365	0.0174825	M_All:211	FBgn0033725	Cpr49Ac
FBgn0033725;SE:2R:12387517-12387913:12387939-12388300:+	0.311233	0.0174825	M_All:211	FBgn0033725	Cpr49Ac
FBgn0034246;A5:2R:17578495-17578554:17578495-17578557:-	-1	0	M_All:211	FBgn0034246	Dcr-2
FBgn0034962;A5:2R:24034432-24034688:24034420-24034688:+	-0.506661	0.032967	M_All:211	FBgn0034962	MAN1
FBgn0035473;AF:3L:3909039-3909221:3909592:3909039-3909757:3909931:-	0.353962	0.010989	M_All:211	FBgn0035473	mge
FBgn0035499;AF:3L:4115646-4115723:4115752:4115646-4122156:4122388:-	-0.204136	0.013986	M_All:211	FBgn0035499	Chd64
FBgn0035844;RI:3L:8142612:8142818-8143408:8144710:-	-0.302583	0.0364635	M_All:211	FBgn0035844	CG13676
FBgn0036537;A3:3L:15834883-15835194:15834879-15835194:-	0.189419	0.0544456	M_All:211	FBgn0036537	CG18081
FBgn0037697;AF:3R:9458772-9459128:9459176:9458772-9460271:9460652:-	0.420188	0.0544456	M_All:211	FBgn0037697	GstZ2
FBgn0038079;AF:3R:12695129:12695406-12696123:12695998:12696047-12696123:+	-0.776094	0.00749251	M_All:211	FBgn0038079	NijC
FBgn0038811;A5:3R:20592493-20592557:20592493-20592561:-	0.567464	0.046953	M_All:211	FBgn0038811	CG4159
FBgn0038829;AL:3R:20819129:20819494-20820650:20819626:20820443-20820650:-	0.329887	0.0104895	M_All:211	FBgn0038829	CG17271
FBgn0050118;RI:2R:18430737:18430885-18431173:18431357:-	-0.669403	0.017982	M_All:211	FBgn0050118	CG30118
FBgn0051547;AF:3R:5498870-5498943:5499014:5498870-5502037:5502702:-	0.445448	0.0344655	M_All:211	FBgn0051547	CG31547
FBgn0052404;A5:3L:6142187-6142249:6142187-6142253:-	0.398685	0.0324675	M_All:211	FBgn0052404	Cpr65Aw
FBgn0053170;AF:3L:22864600:22864925-22865771:22865486:22865696-22865771:+	0.277245	0.0444555	M_All:211	FBgn0053170	CG33170
FBgn0053170;AF:3L:22864842:22864925-22865771:22865486:22865696-22865771:+	0.353509	0.042957	M_All:211	FBgn0053170	CG33170
FBgn0259896;AF:2L:13975879-13975978:13976254:13975879-13976477:13976769:-	-0.743398	0.0214785	M_All:211	FBgn0259896	NimC1
FBgn0263006;AF:2R:23932814-23933259:23933444:23932814-23935580:23935680:-	-0.824828	0.0224775	M_All:211	FBgn0263006	Ca-P60A
FBgn0263006;AF:2R:23932814-23933259:23933444:23932814-23935825:23935884:-	-0.368351	0.0536963	M_All:211	FBgn0263006	Ca-P60A
FBgn0263006;AF:2R:23932814-23933691:23933740:23932814-23935580:23935680:-	-0.603127	0.0532801	M_All:211	FBgn0263006	Ca-P60A
FBgn0263006;AF:2R:23932814-23935580:23935680:23932814-23935825:23935884:-	0.593912	0.0224775	M_All:211	FBgn0263006	Ca-P60A
FBgn0264489;A3:3L:9830785-9832196:9830785-9832199:+	-0.453426	0.0438312	M_All:211	FBgn0264489	CG43897
FBgn0264489;A3:3L:9831440-9832196:9831440-9832199:+	-0.741778	0	M_All:211	FBgn0264489	CG43897
FBgn0264489;A5:3L:9813927-9820280:9813922-9820280:+	0.877347	0.00674326	M_All:211	FBgn0264489	CG43897
FBgn0264489;A5:3L:9813961-9820280:9813927-9820280:+	-0.780879	0.0539461	M_All:211	FBgn0264489	CG43897
FBgn0264489;SE:3L:9830785-9831000:9831440-9832199:+	0.389931	0.0438312	M_All:211	FBgn0264489	CG43897
FBgn0265045;A5:2R:15951466-15951872:15951466-15951907:-	0.470896	0.0431235	M_All:211	FBgn0265045	Strn-Mlck
FBgn0265045;AF:2R:15951466-15951872:15952088:15951466-15952348:15952518:-	0.625657	0.0262238	M_All:211	FBgn0265045	Strn-Mlck
FBgn0265045;SE:2R:15947606-15948005:15948710-15948808:-	-0.614479	0.0262238	M_All:211	FBgn0265045	Strn-Mlck
FBgn0265177;A5:2R:16196602-16196692:16196572-16196692:+	-0.227987	0.0174825	M_All:211	FBgn0265177	CG44242
FBgn0000562;AF:2R:23744614-23745098:23745184:23744614-23746200:23746829:-	0.439638	0.02997	M_All:211	FBgn0000562	egl
FBgn0001125;AF:2L:1986105-1986797:1986955:1986105-1987585:1987758:-	-0.1836	0.0364635	M_All:211	FBgn0001125	Got2
FBgn0001256;A3:3L:13382835-13382911:13382835-13382914:+	1	0	M_All:211	FBgn0001256	ImpL1
FBgn0002567;AF:2R:9179225-9179749:9180338:9179225-9185217:9186342:-	0.942812	0.0539461	M_All:211	FBgn0002567	ltd
FBgn0002673;A5:2L:16261505-16261591:16261505-16261617:-	-0.666667	0.02997	M_All:211	FBgn0002673	twe
FBgn0003137;SE:3R:28521700-28521815:28522231-28522482:-	0.55479	0.034965	M_All:211	FBgn0003137	Ppn
FBgn0003741;A3:3L:16590930-16591004:16590755-16591004:-	-0.269033	0.0484515	M_All:211	FBgn0003741	tra
FBgn0003941;A5:2L:4227807-4228012:4227749-4228012:+	-0.0506708	0.0494505	M_All:211	FBgn0003941	RpL40
FBgn0004855;A3:3R:14309122-14309178:14309122-14309185:+	0.324304	0.0384615	M_All:211	FBgn0004855	RpII15
FBgn0005198;A3:3L:20135620-20135678:20135620-20135687:+	-0.666667	0.03996	M_All:211	FBgn0005198	gig
FBgn0010235;AF:3L:12748682-12748807:12748898:12748682-12749963:12750056:-	-0.380205	0.0529471	M_All:211	FBgn0010235	Klc
FBgn0011571;SE:X:16288957-16289027:16289158-16289226:+	0.301403	0.0494505	M_All:211	FBgn0011571	caz
FBgn0011653;A3:3L:4164799-4164885:4164796-4164885:-	-1	0	M_All:211	FBgn0011653	mas
FBgn0013764;AF:2R:24033572-24033679:24033768:24033572-24033823:24033943:-	0.333333	0.0434565	M_All:211	FBgn0013764	Chi
FBgn0014141;AF:3R:17094749-17095364:17095547:17094749-17098562:17098807:-	0.540019	0.0124875	M_All:211	FBgn0014141	cher
FBgn0015513;SE:3R:23795240-23796385:23796498-23797099:+	0.867083	0.0414585	M_All:211	FBgn0015513	mbc
FBgn0015756;RI:2L:11004006:11004055-11004129:11004153:-	-0.552598	0.00699301	M_All:211	FBgn0015756	RpL9
FBgn0015791;AF:2L:14355145:14355473-14357341:14357041:14357271-14357341:+	0.227962	0.0529471	M_All:211	FBgn0015791	Rab14
FBgn0015926;A3:X:15328952-15329010:15328952-15329019:+	-1	0	M_All:211	FBgn0015926	dah
FBgn0016701;RI:2R:17573462:17573521-17573621:17573714:+	-0.320836	0.037962	M_All:211	FBgn0016701	Rab4
FBgn0020236;A3:2R:15996365-15996895:15996314-15996895:-	-0.451966	0.03996	M_All:211	FBgn0020236	ATPCL
FBgn0020236;AF:2R:15999970-16000095:16000287:15999970-16001188:16001290:-	0.41686	0.03996	M_All:211	FBgn0020236	ATPCL
FBgn0020521;AF:2R:24581245:24582078-24588747:24587707:24587786-24588747:+	0.668858	0.0539461	M_All:211	FBgn0020521	pio
FBgn0021847;A3:2R:6210855-6211596:6210825-6211596:-	-0.884226	0.031968	M_All:211	FBgn0021847	l(2)k14710
FBgn0022893;RI:2L:21629667:21629776-21629885:21629932:-	0.244397	0.00799201	M_All:211	FBgn0022893	Df31
FBgn0024234;RI:2R:23851562:23851601-23851683:23853247:+	0.216442	0.0514486	M_All:211	FBgn0024234	gbb
FBgn0024315;AF:2R:16657439-16658747:16659158:16657439-16663515:16663960:-	-0.855935	0.040959	M_All:211	FBgn0024315	Picot
FBgn0024321;SE:3R:14345184-14349922:14350003-14367193:-	-0.581423	0.0534466	M_All:211	FBgn0024321	NK7.1
FBgn0025639;AF:X:654096-654865:654938:654096-655380:656033:-	0.320914	0.0484515	M_All:211	FBgn0025639	Hmt4-20
FBgn0025741;SE:4:1020015-1022242:1023680-1026963:-	1	0	M_All:211	FBgn0025741	PlexA
FBgn0025865;A3:3R:21064111-21064295:21064108-21064295:-	-0.303764	0.040959	M_All:211	FBgn0025865	Cortactin
FBgn0026238;AF:2R:5121652-5121983:5122247:5121652-5128226:5128321:-	0.423815	0.0464535	M_All:211	FBgn0026238	gus
FBgn0027111;A5:3L:267869-268220:267853-268220:+	-0.943563	0.0134865	M_All:211	FBgn0027111	miple
FBgn0027348;AF:2L:14013004:14013138-14015787:14013746:14013917-14015787:+	-0.666667	0.018981	M_All:211	FBgn0027348	bgm
FBgn0027528;A3:X:16745195-16745515:16745180-16745515:-	-0.838329	0.042957	M_All:211	FBgn0027528	CG9634
FBgn0027528;AF:X:16745953-16746060:16746082:16745953-16751508:16751910:-	-0.809754	0.042957	M_All:211	FBgn0027528	CG9634
FBgn0028491;A5:X:3872557-3873118:3872512-3873118:+	0.80878	0.0194805	M_All:211	FBgn0028491	CG2930
FBgn0028494;AF:2R:17708045-17708609:17709087:17708045-17715706:17716493:-	0.895184	0.010989	M_All:211	FBgn0028494	CG6424
FBgn0028494;AF:2R:17708045-17708609:17709087:17708045-17715706:17717270:-	0.761573	0.013986	M_All:211	FBgn0028494	CG6424
FBgn0029785;AF:X:5672480:5672522-5672998:5672734:5672875-5672998:+	-0.0764758	0.0549451	M_All:211	FBgn0029785	RpL35
FBgn0029870;A5:X:6366232-6366633:6366071-6366633:+	0.551994	0.014985	M_All:211	FBgn0029870	Marf
FBgn0029891;A3:X:6684070-6684128:6684070-6684219:+	-0.575753	0.041958	M_All:211	FBgn0029891	Pink1
FBgn0030051;A5:X:8572999-8573529:8572999-8573562:-	0.554601	0.024975	M_All:211	FBgn0030051	spirit
FBgn0030268;AF:X:11136095-11136619:11136778:11136095-11136867:11137118:-	-0.666667	0.032967	M_All:211	FBgn0030268	Klp10A
FBgn0030357;AF:X:11922373-11922588:11922760:11922373-11924158:11924662:-	0.349475	0.0244755	M_All:211	FBgn0030357	Sclp
FBgn0030716;RI:X:15982364:15982689-15982762:15982944:-	-1	0	M_All:211	FBgn0030716	CG9170
FBgn0030742;A3:X:16329830-16329895:16329827-16329895:-	-0.932948	0.033966	M_All:211	FBgn0030742	CG9919
FBgn0031047;RI:X:19638889:19639076-19639145:19639393:+	-0.443212	0.012987	M_All:211	FBgn0031047	Rcd-1
FBgn0031053;AF:X:19661608-19662004:19662293:19661608-19662669:19663367:-	0.760025	0.0534466	M_All:211	FBgn0031053	CG14223
FBgn0031053;AF:X:19661608-19662004:19662293:19661608-19663619:19663971:-	0.945217	0.0534466	M_All:211	FBgn0031053	CG14223
FBgn0031089;A5:X:20150236-20150598:20150125-20150598:+	0.531579	0.003996	M_All:211	FBgn0031089	CG9572
FBgn0031392;A5:2L:2152465-2152663:2152270-2152663:+	-0.678293	0.036963	M_All:211	FBgn0031392	AIF
FBgn0031496;A3:2L:3034977-3035021:3034968-3035021:-	-1	0	M_All:211	FBgn0031496	CG17258
FBgn0032010;AL:2L:8244160:8244501-8244970:8244545:8244732-8244970:-	0.669762	0.044955	M_All:211	FBgn0032010	CG8086
FBgn0032167;A5:2L:9944681-9947266:9944681-9947292:-	0.666667	0.015984	M_All:211	FBgn0032167	CG5853
FBgn0032479;SE:2L:13189618-13189692:13189756-13191904:-	-0.690793	0.0024975	M_All:211	FBgn0032479	CG16974
FBgn0032482;A3:2L:13208777-13209436:13208777-13209493:+	0.478873	0.0474525	M_All:211	FBgn0032482	Pect
FBgn0032482;A3:2L:13208777-13209472:13208777-13209493:+	0.61381	0.01998	M_All:211	FBgn0032482	Pect
FBgn0032499;A3:2L:13287313-13287374:13287313-13287377:+	-0.614695	0.020979	M_All:211	FBgn0032499	Uvrag
FBgn0032499;RI:2L:13286777:13286818-13286871:13287313:+	-0.614695	0.020979	M_All:211	FBgn0032499	Uvrag
FBgn0032516;A5:2L:13386257-13386488:13386257-13386530:-	-0.448328	0.021978	M_All:211	FBgn0032516	CG9293
FBgn0032986;A3:2L:22240103-22240154:22240103-22240170:+	0.250909	0.0534466	M_All:211	FBgn0032986	CG3262
FBgn0033086;A5:2R:6669232-6669330:6669224-6669330:+	-0.399906	0.0519481	M_All:211	FBgn0033086	CG9410
FBgn0033260;RI:2R:8102260:8102544-8102608:8102906:-	-0.765246	0.0184815	M_All:211	FBgn0033260	Cul4
FBgn0033627;AF:2R:11366710:11367101-11368548:11368286:11368400-11368548:+	-0.692783	0.044955	M_All:211	FBgn0033627	CG13204
FBgn0033639;AF:2R:11644964-11645410:11645913:11644964-11648346:11648514:-	0.763628	0.0539461	M_All:211	FBgn0033639	CG9003
FBgn0033715;A3:2R:12335376-12335432:12335376-12335441:+	-0.478092	0.0184815	M_All:211	FBgn0033715	CG8490
FBgn0033807;A3:2R:13212962-13213023:13212932-13213023:-	-0.417926	0.0514486	M_All:211	FBgn0033807	AQP
FBgn0033807;AF:2R:13213931-13214071:13214111:13213931-13214419:13214496:-	-0.417926	0.0514486	M_All:211	FBgn0033807	AQP
FBgn0033996;RI:2R:15203961:15204175-15204235:15204466:+	0.46389	0.0414585	M_All:211	FBgn0033996	CG11807
FBgn0034091;AF:2R:16206079-16206172:16206238:16206079-16210190:16210397:-	-0.675571	0.0524476	M_All:211	FBgn0034091	mrj
FBgn0034091;AF:2R:16206079-16210190:16210397:16206079-16221670:16221793:-	0.607999	0.0524476	M_All:211	FBgn0034091	mrj
FBgn0034091;SE:2R:16205031-16205320:16205580-16205710:-	0.452883	0.0524476	M_All:211	FBgn0034091	mrj
FBgn0034497;AF:2R:20280445-20280590:20280609:20280445-20280988:20281127:-	-0.456862	0.00899101	M_All:211	FBgn0034497	CG9090
FBgn0034982;A3:2R:24137771-24137861:24137768-24137861:-	-0.656937	0.0164835	M_All:211	FBgn0034982	CG4065
FBgn0035112;A3:3L:218195-218280:218195-218283:+	0.398547	0.0474525	M_All:211	FBgn0035112	CG13877
FBgn0035195;AF:3L:1247817:1247947-1248256:1248020:1248188-1248256:+	-0.349581	0.031968	M_All:211	FBgn0035195	Sac1
FBgn0035260;AF:3L:1674709:1675167-1698647:1688809:1689613-1698647:+	1	0	M_All:211	FBgn0035260	CG7991
FBgn0035481;AF:3L:3962669-3963812:3963977:3962669-3964491:3964771:-	-0.651669	0.0424575	M_All:211	FBgn0035481	CG12605
FBgn0035484;RI:3L:4024945:4025169-4025847:4026011:-	-0.567497	0.023976	M_All:211	FBgn0035484	CG11594
FBgn0035491;AF:3L:4047456-4047593:4047673:4047456-4047699:4047735:-	-0.62224	0.0034965	M_All:211	FBgn0035491	Dpy-30L2
FBgn0035558;AF:3L:4542120:4542907-4551002:4550689:4550722-4551002:+	0.696952	0.041958	M_All:211	FBgn0035558	CG11357
FBgn0036180;RI:3L:11608676:11609188-11609286:11609465:-	0.540785	0.040959	M_All:211	FBgn0036180	CG6091
FBgn0036992;RI:3L:20439528:20439554-20439772:20439872:-	-0.71758	0.01998	M_All:211	FBgn0036992	CG11796
FBgn0037135;A5:3L:21827035-21827094:21826752-21827094:+	-0.109663	0.0549451	M_All:211	FBgn0037135	CG7414
FBgn0037181;A3:3L:22712672-22712738:22712672-22712753:+	-0.0966	0.0509491	M_All:211	FBgn0037181	CG11370
FBgn0037262;RI:3R:4641963:4642008-4642284:4642428:+	-0.244239	0.0547786	M_All:211	FBgn0037262	MED31
FBgn0037262;SE:3R:4642008-4642284:4642428-4642569:+	0.360689	0.048951	M_All:211	FBgn0037262	MED31
FBgn0037262;SE:3R:4642008-4642289:4642428-4642569:+	0.420243	0.0547786	M_All:211	FBgn0037262	MED31
FBgn0037440;AF:3R:6373380-6373460:6373574:6373380-6373814:6373912:-	0.666667	0.0194805	M_All:211	FBgn0037440	CG1041
FBgn0037592;AF:3R:8517868:8518391-8519606:8519041:8519169-8519606:+	0.490712	0.048951	M_All:211	FBgn0037592	CG11737
FBgn0037643;SE:3R:8941189-8941314:8941316-8941408:+	-0.320477	0.014985	M_All:211	FBgn0037643	skap
FBgn0037852;RI:3R:10881563:10881803-10881903:10882188:-	-0.410668	0.02997	M_All:211	FBgn0037852	Tpc1
FBgn0037912;AF:3R:11561205-11562201:11562296:11561205-11563226:11563292:-	0.307539	0.038961	M_All:211	FBgn0037912	sea
FBgn0037978;RI:3R:12009290:12010143-12010242:12010434:-	-0.615709	0.0394605	M_All:211	FBgn0037978	KLHL18
FBgn0038251;A5:3R:14659615-14659744:14659582-14659744:+	-0.390584	0.036963	M_All:211	FBgn0038251	Hexim
FBgn0038389;RI:3R:15963884:15963897-15963976:15964097:+	0.502851	0.00849151	M_All:211	FBgn0038389	CG5516
FBgn0038683;AF:3R:19156546-19156659:19156812:19156546-19159610:19159878:-	0.892379	0.0194805	M_All:211	FBgn0038683	CG11779
FBgn0038771;AF:3R:20057374-20057442:20057490:20057374-20059567:20059750:-	0.158477	0.043956	M_All:211	FBgn0038771	CG4390
FBgn0038846;A5:3R:21016041-21016220:21016008-21016220:+	0.514883	0.033966	M_All:211	FBgn0038846	CG5697
FBgn0039045;AF:3R:23056326-23057433:23057547:23056326-23058884:23058958:-	0.477526	0.0224775	M_All:211	FBgn0039045	CG17119
FBgn0039116;A3:3R:23767870-23768009:23767870-23768079:+	-0.230855	0.030969	M_All:211	FBgn0039116	CG10375
FBgn0039478;RI:3R:27058713:27058911-27059071:27059119:-	-1	0	M_All:211	FBgn0039478	Nep5
FBgn0039480;AF:3R:27084483-27086341:27086619:27084483-27087512:27087778:-	1	0	M_All:211	FBgn0039480	Cpr97Ea
FBgn0039804;A5:3R:30828480-30833642:30828465-30833642:+	-1	0	M_All:211	FBgn0039804	CG15544
FBgn0039924;A5:4:1196477-1196708:1196477-1196758:-	-0.454001	0.0254745	M_All:211	FBgn0039924	PIP4K
FBgn0041087;A3:2R:9415361-9416402:9415361-9416645:+	-0.441839	0.0499501	M_All:211	FBgn0041087	wun2
FBgn0050334;A3:2R:12441137-12441188:12441120-12441188:-	-0.567496	0.0324675	M_All:211	FBgn0050334	CG30334
FBgn0050460;A3:2R:17069757-17069899:17068215-17069899:-	0.689934	0.0264735	M_All:211	FBgn0050460	CG30460
FBgn0051055;RI:3R:27686939:27687879-27687943:27688134:-	-0.666667	0.0394605	M_All:211	FBgn0051055	CG31055
FBgn0051361;AF:3R:12095630:12097016-12107139:12098086:12098656-12107139:+	0.606786	0.047952	M_All:211	FBgn0051361	dpr17
FBgn0052103;A5:3L:12414086-12414702:12414086-12414706:-	0.605023	0.0519481	M_All:211	FBgn0052103	CG32103
FBgn0052105;A3:3L:12330253-12334207:12330253-12334210:+	-1	0	M_All:211	FBgn0052105	CG32105
FBgn0052686;RI:X:10371717:10374277-10374342:10375316:-	-0.942364	0.036963	M_All:211	FBgn0052686	CG32686
FBgn0053113;AF:2L:4994994-4995376:4995482:4994994-4997114:4997381:-	0.378913	0.0519481	M_All:211	FBgn0053113	Rtnl1
FBgn0053113;AF:2L:4994994-4995376:4995482:4994994-5008181:5009720:-	0.593497	0.0519481	M_All:211	FBgn0053113	Rtnl1
FBgn0053523;AF:3L:5926871:5927066-5928224:5927782:5927907-5928224:+	0.328935	0.0344655	M_All:211	FBgn0053523	Vap-33B
FBgn0053526;AF:2L:870465:870552-871341:871095:871274-871341:+	-0.495434	0.021978	M_All:211	FBgn0053526	PNUTS
FBgn0058196;AF:2R:1521559-1526741:1526943:1521559-1527005:1527095:-	-0.649008	0.018981	M_All:211	FBgn0058196	Maf1
FBgn0063485;A3:3L:16679869-16680812:16679473-16680812:-	0.595106	0.023976	M_All:211	FBgn0063485	Lasp
FBgn0085405;AL:3R:22457477-22458321:22459421:22457477-22459842:22460749:+	-0.398393	0.02997	M_All:211	FBgn0085405	CG34376
FBgn0085468;AL:2R:13159103-13159534:13159649:13159103-13159731:13160190:+	0.238679	0.023976	M_All:211	FBgn0085468	CG34439
FBgn0086347;RI:2L:10505926:10506106-10506684:10506779:-	-0.656839	0.011988	M_All:211	FBgn0086347	Myo31DF
FBgn0086904;AF:2R:12760521-12760727:12760792:12760521-12760805:12760999:-	0.673936	0.026973	M_All:211	FBgn0086904	Nacalpha
FBgn0259238;AF:2R:11295885-11296172:11296215:11295885-11297262:11297520:-	0.608477	0.0314685	M_All:211	FBgn0259238	CG42336
FBgn0259722;RI:X:254876:254921-254984:255524:+	0.271513	0.0524476	M_All:211	FBgn0259722	CG42376
FBgn0259740;RI:3R:10851285:10851488-10851541:10851788:+	0.279663	0.047952	M_All:211	FBgn0259740	CG42394
FBgn0259740;RI:3R:10851285:10851488-10851549:10851788:+	0.328469	0.0404595	M_All:211	FBgn0259740	CG42394
FBgn0260388;A5:3L:16495536-16496053:16495536-16496139:-	-0.654961	0.034965	M_All:211	FBgn0260388	CG42514
FBgn0261561;AF:3R:5813609:5813937-5814939:5814667:5814849-5814939:+	0.600671	0.00699301	M_All:211	FBgn0261561	CG42675
FBgn0261955;AF:X:6350629:6350954-6358902:6352282:6352481-6358902:+	-0.203595	0.0344655	M_All:211	FBgn0261955	kdn
FBgn0263144;A3:2R:6221276-6233256:6221276-6233266:+	-0.666667	0.0324675	M_All:211	FBgn0263144	bin3
FBgn0263199;AF:3L:8985231-8985419:8985594:8985231-8985977:8986091:-	0.445559	0.015984	M_All:211	FBgn0263199	Galk
FBgn0263236;AF:3R:29248414-29248860:29248904:29248414-29250190:29250451:-	1	0	M_All:211	FBgn0263236	SP1029
FBgn0263236;AF:3R:29248414-29248860:29248904:29248414-29250362:29250451:-	1	0	M_All:211	FBgn0263236	SP1029
FBgn0263667;A3:2R:23901955-23902020:23901955-23902032:+	0.666667	0.048951	M_All:211	FBgn0263667	Lpt
FBgn0264672;RI:2L:2381097:2381125-2381189:2382296:+	0.580325	0.017982	M_All:211	FBgn0264672	Eogt
FBgn0265575;AF:X:3865439-3866512:3866717:3865439-3867939:3868331:-	0.871197	0.0304695	M_All:211	FBgn0265575	yin
FBgn0266418;A5:3R:22667042-22667980:22667038-22667980:+	0.960543	0.048951	M_All:211	FBgn0266418	wake
FBgn0266418;SE:3R:22668042-22675948:22676198-22676909:+	0.960543	0.048951	M_All:211	FBgn0266418	wake
FBgn0266570;A3:X:4319503-4319566:4319503-4319570:+	0.666667	0.0174825	M_All:211	FBgn0266570	CG2982
FBgn0005672;SE:2L:19569226-19571572:19571767-19577186:-	0.523387	0.0262238	M_New_Sex_Specif.:106	FBgn0005672	spi
FBgn0010246;AF:3L:1318480:1318769-1325995:1325117:1325260-1325995:+	-0.551771	0.0337163	M_New_Sex_Specif.:106	FBgn0010246	Myo61F
FBgn0033725;SE:2R:12387427-12387913:12387939-12388300:+	0.260365	0.0174825	M_New_Sex_Specif.:106	FBgn0033725	Cpr49Ac
FBgn0053170;AF:3L:22864600:22864925-22865771:22865486:22865696-22865771:+	0.277245	0.0444555	M_New_Sex_Specif.:106	FBgn0053170	CG33170
FBgn0263006;AF:2R:23932814-23933259:23933444:23932814-23935825:23935884:-	-0.368351	0.0536963	M_New_Sex_Specif.:106	FBgn0263006	Ca-P60A
FBgn0263006;AF:2R:23932814-23933691:23933740:23932814-23935580:23935680:-	-0.603127	0.0532801	M_New_Sex_Specif.:106	FBgn0263006	Ca-P60A
FBgn0265045;A5:2R:15951466-15951872:15951466-15951907:-	0.470896	0.0431235	M_New_Sex_Specif.:106	FBgn0265045	Strn-Mlck
FBgn0265045;AF:2R:15951466-15951872:15952088:15951466-15952348:15952518:-	0.625657	0.0262238	M_New_Sex_Specif.:106	FBgn0265045	Strn-Mlck
FBgn0000562;AF:2R:23744614-23745098:23745184:23744614-23746200:23746829:-	0.439638	0.02997	M_New_Sex_Specif.:106	FBgn0000562	egl
FBgn0001256;A3:3L:13382835-13382911:13382835-13382914:+	1	0	M_New_Sex_Specif.:106	FBgn0001256	ImpL1
FBgn0002567;AF:2R:9179225-9179749:9180338:9179225-9185217:9186342:-	0.942812	0.0539461	M_New_Sex_Specif.:106	FBgn0002567	ltd
FBgn0003137;SE:3R:28521700-28521815:28522231-28522482:-	0.55479	0.034965	M_New_Sex_Specif.:106	FBgn0003137	Ppn
FBgn0003941;A5:2L:4227807-4228012:4227749-4228012:+	-0.0506708	0.0494505	M_New_Sex_Specif.:106	FBgn0003941	RpL40
FBgn0005198;A3:3L:20135620-20135678:20135620-20135687:+	-0.666667	0.03996	M_New_Sex_Specif.:106	FBgn0005198	gig
FBgn0011653;A3:3L:4164799-4164885:4164796-4164885:-	-1	0	M_New_Sex_Specif.:106	FBgn0011653	mas
FBgn0013764;AF:2R:24033572-24033679:24033768:24033572-24033823:24033943:-	0.333333	0.0434565	M_New_Sex_Specif.:106	FBgn0013764	Chi
FBgn0014141;AF:3R:17094749-17095364:17095547:17094749-17098562:17098807:-	0.540019	0.0124875	M_New_Sex_Specif.:106	FBgn0014141	cher
FBgn0015513;SE:3R:23795240-23796385:23796498-23797099:+	0.867083	0.0414585	M_New_Sex_Specif.:106	FBgn0015513	mbc
FBgn0015791;AF:2L:14355145:14355473-14357341:14357041:14357271-14357341:+	0.227962	0.0529471	M_New_Sex_Specif.:106	FBgn0015791	Rab14
FBgn0015926;A3:X:15328952-15329010:15328952-15329019:+	-1	0	M_New_Sex_Specif.:106	FBgn0015926	dah
FBgn0016701;RI:2R:17573462:17573521-17573621:17573714:+	-0.320836	0.037962	M_New_Sex_Specif.:106	FBgn0016701	Rab4
FBgn0020236;A3:2R:15996365-15996895:15996314-15996895:-	-0.451966	0.03996	M_New_Sex_Specif.:106	FBgn0020236	ATPCL
FBgn0020236;AF:2R:15999970-16000095:16000287:15999970-16001188:16001290:-	0.41686	0.03996	M_New_Sex_Specif.:106	FBgn0020236	ATPCL
FBgn0021847;A3:2R:6210855-6211596:6210825-6211596:-	-0.884226	0.031968	M_New_Sex_Specif.:106	FBgn0021847	l(2)k14710
FBgn0024315;AF:2R:16657439-16658747:16659158:16657439-16663515:16663960:-	-0.855935	0.040959	M_New_Sex_Specif.:106	FBgn0024315	Picot
FBgn0024321;SE:3R:14345184-14349922:14350003-14367193:-	-0.581423	0.0534466	M_New_Sex_Specif.:106	FBgn0024321	NK7.1
FBgn0025639;AF:X:654096-654865:654938:654096-655380:656033:-	0.320914	0.0484515	M_New_Sex_Specif.:106	FBgn0025639	Hmt4-20
FBgn0025741;SE:4:1020015-1022242:1023680-1026963:-	1	0	M_New_Sex_Specif.:106	FBgn0025741	PlexA
FBgn0025865;A3:3R:21064111-21064295:21064108-21064295:-	-0.303764	0.040959	M_New_Sex_Specif.:106	FBgn0025865	Cortactin
FBgn0026238;AF:2R:5121652-5121983:5122247:5121652-5128226:5128321:-	0.423815	0.0464535	M_New_Sex_Specif.:106	FBgn0026238	gus
FBgn0027111;A5:3L:267869-268220:267853-268220:+	-0.943563	0.0134865	M_New_Sex_Specif.:106	FBgn0027111	miple
FBgn0027528;A3:X:16745195-16745515:16745180-16745515:-	-0.838329	0.042957	M_New_Sex_Specif.:106	FBgn0027528	CG9634
FBgn0027528;AF:X:16745953-16746060:16746082:16745953-16751508:16751910:-	-0.809754	0.042957	M_New_Sex_Specif.:106	FBgn0027528	CG9634
FBgn0028494;AF:2R:17708045-17708609:17709087:17708045-17715706:17716493:-	0.895184	0.010989	M_New_Sex_Specif.:106	FBgn0028494	CG6424
FBgn0028494;AF:2R:17708045-17708609:17709087:17708045-17715706:17717270:-	0.761573	0.013986	M_New_Sex_Specif.:106	FBgn0028494	CG6424
FBgn0029891;A3:X:6684070-6684128:6684070-6684219:+	-0.575753	0.041958	M_New_Sex_Specif.:106	FBgn0029891	Pink1
FBgn0030051;A5:X:8572999-8573529:8572999-8573562:-	0.554601	0.024975	M_New_Sex_Specif.:106	FBgn0030051	spirit
FBgn0030268;AF:X:11136095-11136619:11136778:11136095-11136867:11137118:-	-0.666667	0.032967	M_New_Sex_Specif.:106	FBgn0030268	Klp10A
FBgn0030357;AF:X:11922373-11922588:11922760:11922373-11924158:11924662:-	0.349475	0.0244755	M_New_Sex_Specif.:106	FBgn0030357	Sclp
FBgn0030716;RI:X:15982364:15982689-15982762:15982944:-	-1	0	M_New_Sex_Specif.:106	FBgn0030716	CG9170
FBgn0030742;A3:X:16329830-16329895:16329827-16329895:-	-0.932948	0.033966	M_New_Sex_Specif.:106	FBgn0030742	CG9919
FBgn0031047;RI:X:19638889:19639076-19639145:19639393:+	-0.443212	0.012987	M_New_Sex_Specif.:106	FBgn0031047	Rcd-1
FBgn0031053;AF:X:19661608-19662004:19662293:19661608-19662669:19663367:-	0.760025	0.0534466	M_New_Sex_Specif.:106	FBgn0031053	CG14223
FBgn0031053;AF:X:19661608-19662004:19662293:19661608-19663619:19663971:-	0.945217	0.0534466	M_New_Sex_Specif.:106	FBgn0031053	CG14223
FBgn0031496;A3:2L:3034977-3035021:3034968-3035021:-	-1	0	M_New_Sex_Specif.:106	FBgn0031496	CG17258
FBgn0032010;AL:2L:8244160:8244501-8244970:8244545:8244732-8244970:-	0.669762	0.044955	M_New_Sex_Specif.:106	FBgn0032010	CG8086
FBgn0032499;A3:2L:13287313-13287374:13287313-13287377:+	-0.614695	0.020979	M_New_Sex_Specif.:106	FBgn0032499	Uvrag
FBgn0032499;RI:2L:13286777:13286818-13286871:13287313:+	-0.614695	0.020979	M_New_Sex_Specif.:106	FBgn0032499	Uvrag
FBgn0032986;A3:2L:22240103-22240154:22240103-22240170:+	0.250909	0.0534466	M_New_Sex_Specif.:106	FBgn0032986	CG3262
FBgn0033086;A5:2R:6669232-6669330:6669224-6669330:+	-0.399906	0.0519481	M_New_Sex_Specif.:106	FBgn0033086	CG9410
FBgn0033260;RI:2R:8102260:8102544-8102608:8102906:-	-0.765246	0.0184815	M_New_Sex_Specif.:106	FBgn0033260	Cul4
FBgn0033627;AF:2R:11366710:11367101-11368548:11368286:11368400-11368548:+	-0.692783	0.044955	M_New_Sex_Specif.:106	FBgn0033627	CG13204
FBgn0033639;AF:2R:11644964-11645410:11645913:11644964-11648346:11648514:-	0.763628	0.0539461	M_New_Sex_Specif.:106	FBgn0033639	CG9003
FBgn0033807;A3:2R:13212962-13213023:13212932-13213023:-	-0.417926	0.0514486	M_New_Sex_Specif.:106	FBgn0033807	AQP
FBgn0033807;AF:2R:13213931-13214071:13214111:13213931-13214419:13214496:-	-0.417926	0.0514486	M_New_Sex_Specif.:106	FBgn0033807	AQP
FBgn0033996;RI:2R:15203961:15204175-15204235:15204466:+	0.46389	0.0414585	M_New_Sex_Specif.:106	FBgn0033996	CG11807
FBgn0034091;AF:2R:16206079-16206172:16206238:16206079-16210190:16210397:-	-0.675571	0.0524476	M_New_Sex_Specif.:106	FBgn0034091	mrj
FBgn0034091;AF:2R:16206079-16210190:16210397:16206079-16221670:16221793:-	0.607999	0.0524476	M_New_Sex_Specif.:106	FBgn0034091	mrj
FBgn0034091;SE:2R:16205031-16205320:16205580-16205710:-	0.452883	0.0524476	M_New_Sex_Specif.:106	FBgn0034091	mrj
FBgn0034497;AF:2R:20280445-20280590:20280609:20280445-20280988:20281127:-	-0.456862	0.00899101	M_New_Sex_Specif.:106	FBgn0034497	CG9090
FBgn0034982;A3:2R:24137771-24137861:24137768-24137861:-	-0.656937	0.0164835	M_New_Sex_Specif.:106	FBgn0034982	CG4065
FBgn0035112;A3:3L:218195-218280:218195-218283:+	0.398547	0.0474525	M_New_Sex_Specif.:106	FBgn0035112	CG13877
FBgn0035260;AF:3L:1674709:1675167-1698647:1688809:1689613-1698647:+	1	0	M_New_Sex_Specif.:106	FBgn0035260	CG7991
FBgn0035481;AF:3L:3962669-3963812:3963977:3962669-3964491:3964771:-	-0.651669	0.0424575	M_New_Sex_Specif.:106	FBgn0035481	CG12605
FBgn0035484;RI:3L:4024945:4025169-4025847:4026011:-	-0.567497	0.023976	M_New_Sex_Specif.:106	FBgn0035484	CG11594
FBgn0035491;AF:3L:4047456-4047593:4047673:4047456-4047699:4047735:-	-0.62224	0.0034965	M_New_Sex_Specif.:106	FBgn0035491	Dpy-30L2
FBgn0036180;RI:3L:11608676:11609188-11609286:11609465:-	0.540785	0.040959	M_New_Sex_Specif.:106	FBgn0036180	CG6091
FBgn0036992;RI:3L:20439528:20439554-20439772:20439872:-	-0.71758	0.01998	M_New_Sex_Specif.:106	FBgn0036992	CG11796
FBgn0037135;A5:3L:21827035-21827094:21826752-21827094:+	-0.109663	0.0549451	M_New_Sex_Specif.:106	FBgn0037135	CG7414
FBgn0037181;A3:3L:22712672-22712738:22712672-22712753:+	-0.0966	0.0509491	M_New_Sex_Specif.:106	FBgn0037181	CG11370
FBgn0037262;RI:3R:4641963:4642008-4642284:4642428:+	-0.244239	0.0547786	M_New_Sex_Specif.:106	FBgn0037262	MED31
FBgn0037262;SE:3R:4642008-4642284:4642428-4642569:+	0.360689	0.048951	M_New_Sex_Specif.:106	FBgn0037262	MED31
FBgn0037262;SE:3R:4642008-4642289:4642428-4642569:+	0.420243	0.0547786	M_New_Sex_Specif.:106	FBgn0037262	MED31
FBgn0037440;AF:3R:6373380-6373460:6373574:6373380-6373814:6373912:-	0.666667	0.0194805	M_New_Sex_Specif.:106	FBgn0037440	CG1041
FBgn0037592;AF:3R:8517868:8518391-8519606:8519041:8519169-8519606:+	0.490712	0.048951	M_New_Sex_Specif.:106	FBgn0037592	CG11737
FBgn0037912;AF:3R:11561205-11562201:11562296:11561205-11563226:11563292:-	0.307539	0.038961	M_New_Sex_Specif.:106	FBgn0037912	sea
FBgn0037978;RI:3R:12009290:12010143-12010242:12010434:-	-0.615709	0.0394605	M_New_Sex_Specif.:106	FBgn0037978	KLHL18
FBgn0038846;A5:3R:21016041-21016220:21016008-21016220:+	0.514883	0.033966	M_New_Sex_Specif.:106	FBgn0038846	CG5697
FBgn0039045;AF:3R:23056326-23057433:23057547:23056326-23058884:23058958:-	0.477526	0.0224775	M_New_Sex_Specif.:106	FBgn0039045	CG17119
FBgn0039116;A3:3R:23767870-23768009:23767870-23768079:+	-0.230855	0.030969	M_New_Sex_Specif.:106	FBgn0039116	CG10375
FBgn0039478;RI:3R:27058713:27058911-27059071:27059119:-	-1	0	M_New_Sex_Specif.:106	FBgn0039478	Nep5
FBgn0039480;AF:3R:27084483-27086341:27086619:27084483-27087512:27087778:-	1	0	M_New_Sex_Specif.:106	FBgn0039480	Cpr97Ea
FBgn0039804;A5:3R:30828480-30833642:30828465-30833642:+	-1	0	M_New_Sex_Specif.:106	FBgn0039804	CG15544
FBgn0039924;A5:4:1196477-1196708:1196477-1196758:-	-0.454001	0.0254745	M_New_Sex_Specif.:106	FBgn0039924	PIP4K
FBgn0041087;A3:2R:9415361-9416402:9415361-9416645:+	-0.441839	0.0499501	M_New_Sex_Specif.:106	FBgn0041087	wun2
FBgn0050460;A3:2R:17069757-17069899:17068215-17069899:-	0.689934	0.0264735	M_New_Sex_Specif.:106	FBgn0050460	CG30460
FBgn0051361;AF:3R:12095630:12097016-12107139:12098086:12098656-12107139:+	0.606786	0.047952	M_New_Sex_Specif.:106	FBgn0051361	dpr17
FBgn0052103;A5:3L:12414086-12414702:12414086-12414706:-	0.605023	0.0519481	M_New_Sex_Specif.:106	FBgn0052103	CG32103
FBgn0052105;A3:3L:12330253-12334207:12330253-12334210:+	-1	0	M_New_Sex_Specif.:106	FBgn0052105	CG32105
FBgn0052686;RI:X:10371717:10374277-10374342:10375316:-	-0.942364	0.036963	M_New_Sex_Specif.:106	FBgn0052686	CG32686
FBgn0053113;AF:2L:4994994-4995376:4995482:4994994-4997114:4997381:-	0.378913	0.0519481	M_New_Sex_Specif.:106	FBgn0053113	Rtnl1
FBgn0053113;AF:2L:4994994-4995376:4995482:4994994-5008181:5009720:-	0.593497	0.0519481	M_New_Sex_Specif.:106	FBgn0053113	Rtnl1
FBgn0053523;AF:3L:5926871:5927066-5928224:5927782:5927907-5928224:+	0.328935	0.0344655	M_New_Sex_Specif.:106	FBgn0053523	Vap-33B
FBgn0053526;AF:2L:870465:870552-871341:871095:871274-871341:+	-0.495434	0.021978	M_New_Sex_Specif.:106	FBgn0053526	PNUTS
FBgn0259238;AF:2R:11295885-11296172:11296215:11295885-11297262:11297520:-	0.608477	0.0314685	M_New_Sex_Specif.:106	FBgn0259238	CG42336
FBgn0259740;RI:3R:10851285:10851488-10851541:10851788:+	0.279663	0.047952	M_New_Sex_Specif.:106	FBgn0259740	CG42394
FBgn0259740;RI:3R:10851285:10851488-10851549:10851788:+	0.328469	0.0404595	M_New_Sex_Specif.:106	FBgn0259740	CG42394
FBgn0260388;A5:3L:16495536-16496053:16495536-16496139:-	-0.654961	0.034965	M_New_Sex_Specif.:106	FBgn0260388	CG42514
FBgn0261955;AF:X:6350629:6350954-6358902:6352282:6352481-6358902:+	-0.203595	0.0344655	M_New_Sex_Specif.:106	FBgn0261955	kdn
FBgn0263199;AF:3L:8985231-8985419:8985594:8985231-8985977:8986091:-	0.445559	0.015984	M_New_Sex_Specif.:106	FBgn0263199	Galk
FBgn0263236;AF:3R:29248414-29248860:29248904:29248414-29250190:29250451:-	1	0	M_New_Sex_Specif.:106	FBgn0263236	SP1029
FBgn0263236;AF:3R:29248414-29248860:29248904:29248414-29250362:29250451:-	1	0	M_New_Sex_Specif.:106	FBgn0263236	SP1029
FBgn0263667;A3:2R:23901955-23902020:23901955-23902032:+	0.666667	0.048951	M_New_Sex_Specif.:106	FBgn0263667	Lpt
FBgn0265575;AF:X:3865439-3866512:3866717:3865439-3867939:3868331:-	0.871197	0.0304695	M_New_Sex_Specif.:106	FBgn0265575	yin
FBgn0266418;A5:3R:22667042-22667980:22667038-22667980:+	0.960543	0.048951	M_New_Sex_Specif.:106	FBgn0266418	wake
FBgn0266418;SE:3R:22668042-22675948:22676198-22676909:+	0.960543	0.048951	M_New_Sex_Specif.:106	FBgn0266418	wake
FBgn0000639;A5:3L:14097808-14097869:14097808-14097875:-	-0.942317	0	M_Non_Sex_Specif.:50	FBgn0000639	Fbp1
FBgn0000667;AF:X:2035198-2036407:2036466:2035198-2042047:2042311:-	0.60211	0.013986	M_Non_Sex_Specif.:50	FBgn0000667	Actn
FBgn0001311;MX:3R:5379688-5380354:5380530-5381322:5379688-5380645:5380821-5381322:-	0.508848	0.025974	M_Non_Sex_Specif.:50	FBgn0001311	kkv
FBgn0003607;RI:2L:8210730:8210861-8210979:8211122:-	0.339005	0.00749251	M_Non_Sex_Specif.:50	FBgn0003607	Su(var)205
FBgn0004577;A3:3R:17025575-17025633:17025575-17025639:+	-0.74937	0.028971	M_Non_Sex_Specif.:50	FBgn0004577	Pxd
FBgn0005671;A3:3R:12627575-12627640:12627561-12627640:-	-0.180365	0.047952	M_Non_Sex_Specif.:50	FBgn0005671	Vha55
FBgn0005672;AF:2L:19569226-19572500:19572610:19569226-19577186:19577315:-	0.604213	0.0262238	M_Non_Sex_Specif.:50	FBgn0005672	spi
FBgn0010225;A5:3R:4236939-4237625:4236804-4237625:+	-0.505082	0.017982	M_Non_Sex_Specif.:50	FBgn0010225	Gel
FBgn0010246;AF:3L:1318480:1318769-1325995:1324563:1324629-1325995:+	-0.631673	0.017982	M_Non_Sex_Specif.:50	FBgn0010246	Myo61F
FBgn0011708;RI:2L:16307346:16307389-16307483:16308329:+	-0.573	0.00749251	M_Non_Sex_Specif.:50	FBgn0011708	Syx5
FBgn0014391;SE:X:15848004-15848298:15848347-15848886:-	0.196558	0.0104895	M_Non_Sex_Specif.:50	FBgn0014391	sun
FBgn0014863;AF:3R:7115838-7116652:7116716:7115838-7117651:7117732:-	0.182947	0.018981	M_Non_Sex_Specif.:50	FBgn0014863	Mlp84B
FBgn0020235;A3:3R:29748769-29748824:29748748-29748824:-	-0.298011	0.0124875	M_Non_Sex_Specif.:50	FBgn0020235	ATPsyn-gamma
FBgn0023541;A5:X:2174920-2175065:2174920-2175074:-	-0.844054	0.025974	M_Non_Sex_Specif.:50	FBgn0023541	Cyp4d14
FBgn0024947;AF:2L:2882833-2882920:2883126:2882833-2884993:2885214:-	-0.693755	0.013986	M_Non_Sex_Specif.:50	FBgn0024947	NTPase
FBgn0026061;AF:3L:16565867-16572274:16572401:16565867-16573266:16573334:-	0.715768	0.02997	M_Non_Sex_Specif.:50	FBgn0026061	Mipp1
FBgn0026718;AF:2L:8451004-8451454:8451515:8451004-8463627:8463994:-	-0.715107	0.00999001	M_Non_Sex_Specif.:50	FBgn0026718	fu12
FBgn0027570;SE:3R:4721390-4722608:4722640-4722774:-	0.417525	0.01998	M_Non_Sex_Specif.:50	FBgn0027570	Nep2
FBgn0029167;A3:3L:13847186-13847248:13847186-13847251:+	0.526541	0.0534466	M_Non_Sex_Specif.:50	FBgn0029167	Hml
FBgn0030724;RI:X:16073403:16073431-16073510:16073568:-	0.588414	0.00799201	M_Non_Sex_Specif.:50	FBgn0030724	Nipsnap
FBgn0031117;AF:X:20467640:20467770-20468547:20468385:20468412-20468547:+	-0.215519	0.046953	M_Non_Sex_Specif.:50	FBgn0031117	GstT3
FBgn0031298;A3:2L:1082665-1082789:1082665-1082792:+	-0.266089	0.032967	M_Non_Sex_Specif.:50	FBgn0031298	Atg4a
FBgn0031417;A5:2L:2370988-2371042:2370988-2371048:-	0.834567	0.0234765	M_Non_Sex_Specif.:50	FBgn0031417	CG3597
FBgn0031737;AL:2L:5762553:5763368-5765961:5763460:5764271-5765961:-	0.193585	0.033966	M_Non_Sex_Specif.:50	FBgn0031737	obst-E
FBgn0032170;RI:2L:9957295:9957329-9957429:9957900:+	-0.429126	0.0264735	M_Non_Sex_Specif.:50	FBgn0032170	CG4658
FBgn0032773;SE:2L:19385363-19385670:19385705-19385780:-	-0.578078	0	M_Non_Sex_Specif.:50	FBgn0032773	fon
FBgn0032774;AF:2L:19388569-19389765:19389799:19388569-19389927:19390075:-	0.372865	0.01998	M_Non_Sex_Specif.:50	FBgn0032774	CG17549
FBgn0032774;AF:2L:19388569-19389765:19389799:19388569-19389936:19390075:-	0.194	0.043956	M_Non_Sex_Specif.:50	FBgn0032774	CG17549
FBgn0033271;AF:2R:8160929-8161033:8161235:8160929-8161411:8161565:-	1	0	M_Non_Sex_Specif.:50	FBgn0033271	CG8708
FBgn0033446;AF:2R:9812664-9812724:9812774:9812664-9819840:9820053:-	0.194554	0.014985	M_Non_Sex_Specif.:50	FBgn0033446	CG1648
FBgn0033551;AF:2R:10813405:10813464-10814031:10813549:10813736-10814031:+	0.723414	0.012987	M_Non_Sex_Specif.:50	FBgn0033551	CG7222
FBgn0035499;AF:3L:4115646-4115723:4115752:4115646-4122156:4122388:-	-0.204136	0.013986	M_Non_Sex_Specif.:50	FBgn0035499	Chd64
FBgn0035844;RI:3L:8142612:8142818-8143408:8144710:-	-0.302583	0.0364635	M_Non_Sex_Specif.:50	FBgn0035844	CG13676
FBgn0036537;A3:3L:15834883-15835194:15834879-15835194:-	0.189419	0.0544456	M_Non_Sex_Specif.:50	FBgn0036537	CG18081
FBgn0037697;AF:3R:9458772-9459128:9459176:9458772-9460271:9460652:-	0.420188	0.0544456	M_Non_Sex_Specif.:50	FBgn0037697	GstZ2
FBgn0038079;AF:3R:12695129:12695406-12696123:12695998:12696047-12696123:+	-0.776094	0.00749251	M_Non_Sex_Specif.:50	FBgn0038079	NijC
FBgn0038829;AL:3R:20819129:20819494-20820650:20819626:20820443-20820650:-	0.329887	0.0104895	M_Non_Sex_Specif.:50	FBgn0038829	CG17271
FBgn0050118;RI:2R:18430737:18430885-18431173:18431357:-	-0.669403	0.017982	M_Non_Sex_Specif.:50	FBgn0050118	CG30118
FBgn0051547;AF:3R:5498870-5498943:5499014:5498870-5502037:5502702:-	0.445448	0.0344655	M_Non_Sex_Specif.:50	FBgn0051547	CG31547
FBgn0052404;A5:3L:6142187-6142249:6142187-6142253:-	0.398685	0.0324675	M_Non_Sex_Specif.:50	FBgn0052404	Cpr65Aw
FBgn0259896;AF:2L:13975879-13975978:13976254:13975879-13976477:13976769:-	-0.743398	0.0214785	M_Non_Sex_Specif.:50	FBgn0259896	NimC1
FBgn0263006;AF:2R:23932814-23933259:23933444:23932814-23935580:23935680:-	-0.824828	0.0224775	M_Non_Sex_Specif.:50	FBgn0263006	Ca-P60A
FBgn0263006;AF:2R:23932814-23935580:23935680:23932814-23935825:23935884:-	0.593912	0.0224775	M_Non_Sex_Specif.:50	FBgn0263006	Ca-P60A
FBgn0264489;A3:3L:9830785-9832196:9830785-9832199:+	-0.453426	0.0438312	M_Non_Sex_Specif.:50	FBgn0264489	CG43897
FBgn0264489;A3:3L:9831440-9832196:9831440-9832199:+	-0.741778	0	M_Non_Sex_Specif.:50	FBgn0264489	CG43897
FBgn0264489;A5:3L:9813927-9820280:9813922-9820280:+	0.877347	0.00674326	M_Non_Sex_Specif.:50	FBgn0264489	CG43897
FBgn0264489;A5:3L:9813961-9820280:9813927-9820280:+	-0.780879	0.0539461	M_Non_Sex_Specif.:50	FBgn0264489	CG43897
FBgn0264489;SE:3L:9830785-9831000:9831440-9832199:+	0.389931	0.0438312	M_Non_Sex_Specif.:50	FBgn0264489	CG43897
FBgn0265045;SE:2R:15947606-15948005:15948710-15948808:-	-0.614479	0.0262238	M_Non_Sex_Specif.:50	FBgn0265045	Strn-Mlck
FBgn0265177;A5:2R:16196602-16196692:16196572-16196692:+	-0.227987	0.0174825	M_Non_Sex_Specif.:50	FBgn0265177	CG44242
FBgn0003676;RI:3R:22491259:22491351-22491416:22491439:-	0.399034	0.0114885	M_Sex_Specif.:55	FBgn0003676	T-cp1
FBgn0010621;AF:2R:12174802:12175028-12175737:12175096:12175128-12175737:+	-0.184501	0.0414585	M_Sex_Specif.:55	FBgn0010621	Cct5
FBgn0024733;A5:3L:23095305-23095426:23095305-23095437:-	0.117627	0.015984	M_Sex_Specif.:55	FBgn0024733	RpL10
FBgn0032305;A5:2L:10842273-10842381:10842273-10842385:-	-0.536424	0.020979	M_Sex_Specif.:55	FBgn0032305	CG6700
FBgn0033725;A5:2R:12387517-12387913:12387427-12387913:+	0.183534	0.0174825	M_Sex_Specif.:55	FBgn0033725	Cpr49Ac
FBgn0033725;RI:2R:12388518:12388533-12388923:12389086:+	-0.171881	0.0174825	M_Sex_Specif.:55	FBgn0033725	Cpr49Ac
FBgn0033725;SE:2R:12387517-12387913:12387939-12388300:+	0.311233	0.0174825	M_Sex_Specif.:55	FBgn0033725	Cpr49Ac
FBgn0034246;A5:2R:17578495-17578554:17578495-17578557:-	-1	0	M_Sex_Specif.:55	FBgn0034246	Dcr-2
FBgn0034962;A5:2R:24034432-24034688:24034420-24034688:+	-0.506661	0.032967	M_Sex_Specif.:55	FBgn0034962	MAN1
FBgn0035473;AF:3L:3909039-3909221:3909592:3909039-3909757:3909931:-	0.353962	0.010989	M_Sex_Specif.:55	FBgn0035473	mge
FBgn0038811;A5:3R:20592493-20592557:20592493-20592561:-	0.567464	0.046953	M_Sex_Specif.:55	FBgn0038811	CG4159
FBgn0053170;AF:3L:22864842:22864925-22865771:22865486:22865696-22865771:+	0.353509	0.042957	M_Sex_Specif.:55	FBgn0053170	CG33170
FBgn0001125;AF:2L:1986105-1986797:1986955:1986105-1987585:1987758:-	-0.1836	0.0364635	M_Sex_Specif.:55	FBgn0001125	Got2
FBgn0002673;A5:2L:16261505-16261591:16261505-16261617:-	-0.666667	0.02997	M_Sex_Specif.:55	FBgn0002673	twe
FBgn0003741;A3:3L:16590930-16591004:16590755-16591004:-	-0.269033	0.0484515	M_Sex_Specif.:55	FBgn0003741	tra
FBgn0004855;A3:3R:14309122-14309178:14309122-14309185:+	0.324304	0.0384615	M_Sex_Specif.:55	FBgn0004855	RpII15
FBgn0010235;AF:3L:12748682-12748807:12748898:12748682-12749963:12750056:-	-0.380205	0.0529471	M_Sex_Specif.:55	FBgn0010235	Klc
FBgn0011571;SE:X:16288957-16289027:16289158-16289226:+	0.301403	0.0494505	M_Sex_Specif.:55	FBgn0011571	caz
FBgn0015756;RI:2L:11004006:11004055-11004129:11004153:-	-0.552598	0.00699301	M_Sex_Specif.:55	FBgn0015756	RpL9
FBgn0020521;AF:2R:24581245:24582078-24588747:24587707:24587786-24588747:+	0.668858	0.0539461	M_Sex_Specif.:55	FBgn0020521	pio
FBgn0022893;RI:2L:21629667:21629776-21629885:21629932:-	0.244397	0.00799201	M_Sex_Specif.:55	FBgn0022893	Df31
FBgn0024234;RI:2R:23851562:23851601-23851683:23853247:+	0.216442	0.0514486	M_Sex_Specif.:55	FBgn0024234	gbb
FBgn0027348;AF:2L:14013004:14013138-14015787:14013746:14013917-14015787:+	-0.666667	0.018981	M_Sex_Specif.:55	FBgn0027348	bgm
FBgn0028491;A5:X:3872557-3873118:3872512-3873118:+	0.80878	0.0194805	M_Sex_Specif.:55	FBgn0028491	CG2930
FBgn0029785;AF:X:5672480:5672522-5672998:5672734:5672875-5672998:+	-0.0764758	0.0549451	M_Sex_Specif.:55	FBgn0029785	RpL35
FBgn0029870;A5:X:6366232-6366633:6366071-6366633:+	0.551994	0.014985	M_Sex_Specif.:55	FBgn0029870	Marf
FBgn0031089;A5:X:20150236-20150598:20150125-20150598:+	0.531579	0.003996	M_Sex_Specif.:55	FBgn0031089	CG9572
FBgn0031392;A5:2L:2152465-2152663:2152270-2152663:+	-0.678293	0.036963	M_Sex_Specif.:55	FBgn0031392	AIF
FBgn0032167;A5:2L:9944681-9947266:9944681-9947292:-	0.666667	0.015984	M_Sex_Specif.:55	FBgn0032167	CG5853
FBgn0032479;SE:2L:13189618-13189692:13189756-13191904:-	-0.690793	0.0024975	M_Sex_Specif.:55	FBgn0032479	CG16974
FBgn0032482;A3:2L:13208777-13209436:13208777-13209493:+	0.478873	0.0474525	M_Sex_Specif.:55	FBgn0032482	Pect
FBgn0032482;A3:2L:13208777-13209472:13208777-13209493:+	0.61381	0.01998	M_Sex_Specif.:55	FBgn0032482	Pect
FBgn0032516;A5:2L:13386257-13386488:13386257-13386530:-	-0.448328	0.021978	M_Sex_Specif.:55	FBgn0032516	CG9293
FBgn0033715;A3:2R:12335376-12335432:12335376-12335441:+	-0.478092	0.0184815	M_Sex_Specif.:55	FBgn0033715	CG8490
FBgn0035195;AF:3L:1247817:1247947-1248256:1248020:1248188-1248256:+	-0.349581	0.031968	M_Sex_Specif.:55	FBgn0035195	Sac1
FBgn0035558;AF:3L:4542120:4542907-4551002:4550689:4550722-4551002:+	0.696952	0.041958	M_Sex_Specif.:55	FBgn0035558	CG11357
FBgn0037643;SE:3R:8941189-8941314:8941316-8941408:+	-0.320477	0.014985	M_Sex_Specif.:55	FBgn0037643	skap
FBgn0037852;RI:3R:10881563:10881803-10881903:10882188:-	-0.410668	0.02997	M_Sex_Specif.:55	FBgn0037852	Tpc1
FBgn0038251;A5:3R:14659615-14659744:14659582-14659744:+	-0.390584	0.036963	M_Sex_Specif.:55	FBgn0038251	Hexim
FBgn0038389;RI:3R:15963884:15963897-15963976:15964097:+	0.502851	0.00849151	M_Sex_Specif.:55	FBgn0038389	CG5516
FBgn0038683;AF:3R:19156546-19156659:19156812:19156546-19159610:19159878:-	0.892379	0.0194805	M_Sex_Specif.:55	FBgn0038683	CG11779
FBgn0038771;AF:3R:20057374-20057442:20057490:20057374-20059567:20059750:-	0.158477	0.043956	M_Sex_Specif.:55	FBgn0038771	CG4390
FBgn0050334;A3:2R:12441137-12441188:12441120-12441188:-	-0.567496	0.0324675	M_Sex_Specif.:55	FBgn0050334	CG30334
FBgn0051055;RI:3R:27686939:27687879-27687943:27688134:-	-0.666667	0.0394605	M_Sex_Specif.:55	FBgn0051055	CG31055
FBgn0058196;AF:2R:1521559-1526741:1526943:1521559-1527005:1527095:-	-0.649008	0.018981	M_Sex_Specif.:55	FBgn0058196	Maf1
FBgn0063485;A3:3L:16679869-16680812:16679473-16680812:-	0.595106	0.023976	M_Sex_Specif.:55	FBgn0063485	Lasp
FBgn0085405;AL:3R:22457477-22458321:22459421:22457477-22459842:22460749:+	-0.398393	0.02997	M_Sex_Specif.:55	FBgn0085405	CG34376
FBgn0085468;AL:2R:13159103-13159534:13159649:13159103-13159731:13160190:+	0.238679	0.023976	M_Sex_Specif.:55	FBgn0085468	CG34439
FBgn0086347;RI:2L:10505926:10506106-10506684:10506779:-	-0.656839	0.011988	M_Sex_Specif.:55	FBgn0086347	Myo31DF
FBgn0086904;AF:2R:12760521-12760727:12760792:12760521-12760805:12760999:-	0.673936	0.026973	M_Sex_Specif.:55	FBgn0086904	Nacalpha
FBgn0259722;RI:X:254876:254921-254984:255524:+	0.271513	0.0524476	M_Sex_Specif.:55	FBgn0259722	CG42376
FBgn0261561;AF:3R:5813609:5813937-5814939:5814667:5814849-5814939:+	0.600671	0.00699301	M_Sex_Specif.:55	FBgn0261561	CG42675
FBgn0263144;A3:2R:6221276-6233256:6221276-6233266:+	-0.666667	0.0324675	M_Sex_Specif.:55	FBgn0263144	bin3
FBgn0264672;RI:2L:2381097:2381125-2381189:2382296:+	0.580325	0.017982	M_Sex_Specif.:55	FBgn0264672	Eogt
FBgn0266570;A3:X:4319503-4319566:4319503-4319570:+	0.666667	0.0174825	M_Sex_Specif.:55	FBgn0266570	CG2982

## Sheet: S3b_CLAMP dep FSS_L3
Splicing_event	dPSI	p-val	sex	gene_id	gene_name		Total Genes=124
FBgn0000565;RI:3L:15512172:15512353-15512476:15512736:+	0.610545	0.0124875	F_New_Sex_Specif.:101	FBgn0000565	Eip71CD
FBgn0000581;AF:2R:11452189:11452383-11453393:11452769:11452880-11453393:+	-0.482625	0.0504496	F_New_Sex_Specif.:101	FBgn0000581	E(Pc)
FBgn0001978;A3:2L:15114213-15114300:15114213-15114312:+	-0.333333	0.0414585	F_New_Sex_Specif.:101	FBgn0001978	stc
FBgn0003660;A3:2R:10251213-10251928:10251144-10251928:-	-0.172773	0.032967	F_New_Sex_Specif.:101	FBgn0003660	Syb
FBgn0003660;SE:2R:10249827-10250369:10250586-10250879:-	-0.150337	0.032967	F_New_Sex_Specif.:101	FBgn0003660	Syb
FBgn0003890;MX:3R:27969191-27969383:27969550-27972921:27969191-27969660:27969827-27972921:-	0.2407	0.0334665	F_New_Sex_Specif.:101	FBgn0003890	betaTub97EF
FBgn0003896;RI:2L:18859507:18860913-18860977:18861205:-	-1	0	F_New_Sex_Specif.:101	FBgn0003896	tup
FBgn0004237;AL:3R:13656846:13657125-13658462:13657324:13658297-13658462:-	0.435652	0.035964	F_New_Sex_Specif.:101	FBgn0004237	Hrb87F
FBgn0004237;AL:3R:13656846:13657125-13658462:13657795:13658297-13658462:-	0.430819	0.035964	F_New_Sex_Specif.:101	FBgn0004237	Hrb87F
FBgn0004362;A5:2R:21713434-21715406:21713387-21715406:+	-0.320013	0.0131119	F_New_Sex_Specif.:101	FBgn0004362	HmgD
FBgn0004362;AF:2R:21701458:21702064-21715406:21713356:21713434-21715406:+	0.378525	0.0131119	F_New_Sex_Specif.:101	FBgn0004362	HmgD
FBgn0004362;AF:2R:21701458:21702064-21715406:21714136:21714166-21715406:+	0.695929	0.0131119	F_New_Sex_Specif.:101	FBgn0004362	HmgD
FBgn0004362;AF:2R:21713356:21713387-21715406:21714136:21714166-21715406:+	0.27903	0.0131119	F_New_Sex_Specif.:101	FBgn0004362	HmgD
FBgn0004828;AF:X:9154685-9154785:9155012:9154685-9156580:9156669:-	-0.208285	0.0529471	F_New_Sex_Specif.:101	FBgn0004828	His3.3B
FBgn0010246;AF:3L:1324563:1324629-1325995:1325117:1325260-1325995:+	0.66165	0.00799201	F_New_Sex_Specif.:101	FBgn0010246	Myo61F
FBgn0011202;AF:2L:20758144:20758663-20760525:20760300:20760457-20760525:+	0.542389	0.044955	F_New_Sex_Specif.:101	FBgn0011202	dia
FBgn0011300;MX:2R:8954851-8955713:8955858-8959107:8954851-8957029:8957156-8959107:+	-0.505343	0.0529471	F_New_Sex_Specif.:101	FBgn0011300	babo
FBgn0011584;AF:2L:10009381:10009536-10010737:10010354:10010557-10010737:+	-0.18591	0.0424575	F_New_Sex_Specif.:101	FBgn0011584	Trp1
FBgn0013272;RI:2R:22317662:22317737-22317882:22317954:+	-0.477045	0.0509491	F_New_Sex_Specif.:101	FBgn0013272	Gp150
FBgn0014859;A5:2L:20690456-20713037:20690456-20713599:-	1	0	F_New_Sex_Specif.:101	FBgn0014859	Hr38
FBgn0015772;AL:2L:18957732:18960680-18962885:18960927:18962791-18962885:-	0.627162	0.0514486	F_New_Sex_Specif.:101	FBgn0015772	Nak
FBgn0016078;AL:2R:9400531:9401148-9402409:9402080:9402234-9402409:-	-0.346742	0.023976	F_New_Sex_Specif.:101	FBgn0016078	wun
FBgn0020251;SE:3L:6496481-6505083:6505119-6523030:+	-0.944906	0.0549451	F_New_Sex_Specif.:101	FBgn0020251	sfl
FBgn0020304;AF:2L:837378-842614:842943:837378-849899:851071:-	0.307446	0.035964	F_New_Sex_Specif.:101	FBgn0020304	drongo
FBgn0021979;A5:2R:23067841-23067947:23067838-23067947:+	-0.15886	0.0539461	F_New_Sex_Specif.:101	FBgn0021979	l(2)k09913
FBgn0022343;A3:2R:24938842-24938956:24938842-24938974:+	0.198729	0.0509491	F_New_Sex_Specif.:101	FBgn0022343	CG3760
FBgn0023023;MX:3R:5575925-5576175:5576413-5577593:5575925-5577036:5577259-5577593:+	0.601562	0.038961	F_New_Sex_Specif.:101	FBgn0023023	CRMP
FBgn0024248;A5:2L:10246039-10246900:10246039-10247025:-	0.755082	0.0254745	F_New_Sex_Specif.:101	FBgn0024248	chico
FBgn0027836;AF:2R:18171319-18171393:18171470:18171319-18172438:18172607:-	-0.206379	0.040959	F_New_Sex_Specif.:101	FBgn0027836	Dgp-1
FBgn0028411;A3:2R:23811737-23811795:23811724-23811795:-	0.504619	0.015984	F_New_Sex_Specif.:101	FBgn0028411	Nxt1
FBgn0029914;RI:X:6849770:6851052-6851300:6851884:+	0.472688	0.0404595	F_New_Sex_Specif.:101	FBgn0029914	CG4558
FBgn0029971;A3:X:7893490-7893750:7893416-7893750:-	-0.320767	0.0104895	F_New_Sex_Specif.:101	FBgn0029971	CG18624
FBgn0030065;AF:X:8838323:8838484-8867549:8864109:8864258-8867549:+	-0.567519	0.0474525	F_New_Sex_Specif.:101	FBgn0030065	CG12075
FBgn0030065;AF:X:8838323:8838484-8867549:8864109:8864273-8867549:+	-0.666667	0.0474525	F_New_Sex_Specif.:101	FBgn0030065	CG12075
FBgn0030474;RI:X:13338452:13340427-13340518:13341009:+	-0.666667	0.031968	F_New_Sex_Specif.:101	FBgn0030474	CG15747
FBgn0030685;A3:X:15754799-15755104:15754772-15755104:-	-0.442559	0.0529471	F_New_Sex_Specif.:101	FBgn0030685	Graf
FBgn0031012;AF:X:19304094-19305294:19305299:19304094-19307639:19307925:-	-0.465137	0.027972	F_New_Sex_Specif.:101	FBgn0031012	CG8051
FBgn0031115;A5:X:20427994-20428051:20427994-20428064:-	0.40879	0.0549451	F_New_Sex_Specif.:101	FBgn0031115	CG11710
FBgn0031117;SE:X:20467770-20468207:20468412-20468547:+	0.747635	0.0254745	F_New_Sex_Specif.:101	FBgn0031117	GstT3
FBgn0031384;AF:2L:2009859:2010313-2026768:2024012:2024265-2026768:+	-1	0	F_New_Sex_Specif.:101	FBgn0031384	CG4238
FBgn0031453;A5:2L:2752840-2753372:2752837-2753372:+	-0.0862531	0.0464535	F_New_Sex_Specif.:101	FBgn0031453	Bacc
FBgn0033092;AF:2R:6675822:6675912-6691698:6680146:6680730-6691698:+	-0.54367	0.0234765	F_New_Sex_Specif.:101	FBgn0033092	CG9422
FBgn0033115;AF:2R:6885552:6885659-6886514:6886393:6886424-6886514:+	-0.666667	0.0434565	F_New_Sex_Specif.:101	FBgn0033115	Spn42De
FBgn0033339;A3:2R:8895644-8895951:8895644-8895954:+	-0.329515	0.036963	F_New_Sex_Specif.:101	FBgn0033339	Sec31
FBgn0033669;AF:2R:11968479-11968740:11968850:11968479-11970026:11970115:-	-0.893274	0.0034965	F_New_Sex_Specif.:101	FBgn0033669	PI31
FBgn0034286;A3:2R:17977793-17978788:17977790-17978788:-	1	0	F_New_Sex_Specif.:101	FBgn0034286	dpr13
FBgn0034381;A3:2R:18728786-18728843:18728746-18728843:-	1	0	F_New_Sex_Specif.:101	FBgn0034381	List
FBgn0034618;AF:2R:21312674:21312740-21314424:21313367:21313716-21314424:+	0.917816	0.02997	F_New_Sex_Specif.:101	FBgn0034618	CG9485
FBgn0034708;A5:2R:22186320-22186517:22186094-22186517:+	0.49341	0.0174825	F_New_Sex_Specif.:101	FBgn0034708	Vps35
FBgn0035397;AF:3L:3073207:3073478-3083733:3077929:3078044-3083733:+	0.618532	0.0454545	F_New_Sex_Specif.:101	FBgn0035397	CG11486
FBgn0035397;AF:3L:3077929:3078044-3083733:3081978:3082227-3083733:+	-0.849231	0.0314685	F_New_Sex_Specif.:101	FBgn0035397	CG11486
FBgn0035431;AF:3L:3300883-3300989:3301142:3300883-3303048:3303112:-	0.43088	0.0539461	F_New_Sex_Specif.:101	FBgn0035431	CG14968
FBgn0035695;AF:3L:6238781-6238895:6238991:6238781-6239273:6240068:-	-1	0	F_New_Sex_Specif.:101	FBgn0035695	CG10226
FBgn0035849;AF:3L:8185042-8185567:8185670:8185042-8186179:8186671:-	0.448371	0.0314685	F_New_Sex_Specif.:101	FBgn0035849	ERR
FBgn0035987;A3:3L:9411982-9412155:9411982-9413203:+	0.252969	0.036963	F_New_Sex_Specif.:101	FBgn0035987	CG3689
FBgn0036101;A3:3L:10695415-10695629:10695367-10695629:-	-0.784189	0.021978	F_New_Sex_Specif.:101	FBgn0036101	NijA
FBgn0036337;AF:3L:13021557-13021628:13021685:13021557-13022438:13022688:-	0.249174	0.022977	F_New_Sex_Specif.:101	FBgn0036337	AdenoK
FBgn0036752;A3:3L:17754425-17764062:17754421-17764062:-	0.798986	0.020979	F_New_Sex_Specif.:101	FBgn0036752	Adgf-A
FBgn0036862;AF:3L:19285413-19288392:19288569:19285413-19291480:19291672:-	-0.51078	0.0184815	F_New_Sex_Specif.:101	FBgn0036862	Gbs-76A
FBgn0036862;AF:3L:19285413-19288392:19288569:19285413-19291480:19292766:-	-0.779709	0.0184815	F_New_Sex_Specif.:101	FBgn0036862	Gbs-76A
FBgn0036945;RI:3L:20188522:20188614-20188676:20188762:+	-0.247425	0.0274725	F_New_Sex_Specif.:101	FBgn0036945	Ssk
FBgn0036993;AF:3L:20442419:20442469-20445948:20445158:20445293-20445948:+	-0.495869	0.0539461	F_New_Sex_Specif.:101	FBgn0036993	CG5910
FBgn0037386;AF:3R:5831639:5831851-5835839:5835029:5835351-5835839:+	0.658618	0.0314685	F_New_Sex_Specif.:101	FBgn0037386	CG1208
FBgn0037659;A5:3R:9052627-9053536:9052575-9053536:+	-0.636799	0.0499501	F_New_Sex_Specif.:101	FBgn0037659	Kdm2
FBgn0038220;AF:3R:14289274:14289449-14290730:14290401:14290460-14290730:+	-0.517726	0.0294705	F_New_Sex_Specif.:101	FBgn0038220	CG12207
FBgn0038476;AF:3R:17080244:17080356-17082664:17081946:17082027-17082664:+	-0.333333	0.0414585	F_New_Sex_Specif.:101	FBgn0038476	kuk
FBgn0039321;A5:3R:25307909-25308181:25307909-25308311:-	0.537744	0.0184815	F_New_Sex_Specif.:101	FBgn0039321	CG10550
FBgn0039406;A3:3R:26059054-26059235:26059051-26059235:-	-0.167312	0.036963	F_New_Sex_Specif.:101	FBgn0039406	RpL34a
FBgn0039690;A5:3R:29740419-29740568:29740407-29740568:+	0.313953	0.042957	F_New_Sex_Specif.:101	FBgn0039690	CG1969
FBgn0039712;A3:3R:29860635-29860707:29860614-29860707:-	-0.350931	0.035964	F_New_Sex_Specif.:101	FBgn0039712	CG15514
FBgn0039849;AF:3R:31461968-31462035:31462178:31461968-31462396:31462467:-	0.414517	0.0516983	F_New_Sex_Specif.:101	FBgn0039849	CG11334
FBgn0039849;AF:3R:31461968-31462035:31462178:31461968-31462830:31463037:-	0.221704	0.0516983	F_New_Sex_Specif.:101	FBgn0039849	CG11334
FBgn0040207;A3:X:16268205-16268274:16268202-16268274:-	-0.471905	0.0504496	F_New_Sex_Specif.:101	FBgn0040207	kat80
FBgn0040281;A3:3L:1197313-1197509:1197313-1197530:+	-0.841583	0.0549451	F_New_Sex_Specif.:101	FBgn0040281	Aplip1
FBgn0040285;RI:X:15446179:15446834-15446904:15447830:-	-0.283117	0.0509491	F_New_Sex_Specif.:101	FBgn0040285	Scamp
FBgn0043841;A5:2L:12421829-12423323:12421829-12423334:-	-0.317176	0.042957	F_New_Sex_Specif.:101	FBgn0043841	vir-1
FBgn0050392;RI:2R:21290914:21290970-21291032:21291581:-	-0.360856	0.0344655	F_New_Sex_Specif.:101	FBgn0050392	CG30392
FBgn0051955;A5:2L:3712445-3712498:3712445-3712768:-	-0.666667	0.0364635	F_New_Sex_Specif.:101	FBgn0051955	CG31955
FBgn0052694;A3:X:10004759-10005154:10004759-10005169:+	1	0	F_New_Sex_Specif.:101	FBgn0052694	CG32694
FBgn0061492;RI:3L:6094987:6095017-6095113:6095343:+	0.361296	0.044955	F_New_Sex_Specif.:101	FBgn0061492	loj
FBgn0085261;RI:2R:12164909:12165493-12165623:12165739:-	-0.131889	0.045954	F_New_Sex_Specif.:101	FBgn0085261	CG34232
FBgn0085280;AF:3L:17671622:17671677-17673651:17671796:17672011-17673651:+	-0.512618	0.0264735	F_New_Sex_Specif.:101	FBgn0085280	CG34251
FBgn0086358;AF:2R:19292529:19292860-19299170:19298243:19298630-19299170:+	-0.294707	0.033966	F_New_Sex_Specif.:101	FBgn0086358	Tab2
FBgn0086442;AF:2L:19034641:19035000-19035761:19035500:19035697-19035761:+	0.542755	0.045954	F_New_Sex_Specif.:101	FBgn0086442	mib2
FBgn0250907;A3:2L:23016104-23025170:23016090-23025170:-	0.640152	0.018981	F_New_Sex_Specif.:101	FBgn0250907	Cht3
FBgn0250907;AF:2L:23025224-23025289:23025419:23025224-23025855:23025915:-	0.619478	0.018981	F_New_Sex_Specif.:101	FBgn0250907	Cht3
FBgn0259749;AF:2L:6471714-6471961:6472072:6471714-6473631:6473904:-	0.30071	0.038961	F_New_Sex_Specif.:101	FBgn0259749	mmy
FBgn0260635;AF:3L:16040065-16040438:16040535:16040065-16042407:16042570:-	0.427671	0.0499501	F_New_Sex_Specif.:101	FBgn0260635	Diap1
FBgn0260635;AF:3L:16040065-16042407:16042570:16040065-16046485:16046846:-	-0.310577	0.0499501	F_New_Sex_Specif.:101	FBgn0260635	Diap1
FBgn0261258;A3:3L:21420362-21420441:21420362-21420465:+	-0.312143	0.0404595	F_New_Sex_Specif.:101	FBgn0261258	rgn
FBgn0261258;SE:3L:21383084-21411530:21411578-21419607:+	0.526194	0.028971	F_New_Sex_Specif.:101	FBgn0261258	rgn
FBgn0261261;SE:3R:5707941-5708021:5708182-5708499:+	-0.548711	0.0314685	F_New_Sex_Specif.:101	FBgn0261261	plx
FBgn0261277;AF:X:11153360-11153488:11153574:11153360-11153617:11153802:-	0.460759	0.0354645	F_New_Sex_Specif.:101	FBgn0261277	rtv
FBgn0261341;MX:3L:19691958-19692265:19692377-19692983:19691958-19692721:19692851-19692983:-	-0.207766	0.024975	F_New_Sex_Specif.:101	FBgn0261341	verm
FBgn0264270;A3:X:7088767-7091674:7088749-7091674:-	-0.635944	0.0374625	F_New_Sex_Specif.:101	FBgn0264270	Sxl
FBgn0264489;A3:3L:9831440-9832196:9831440-9832202:+	-0.441461	0.041625	F_New_Sex_Specif.:101	FBgn0264489	CG43897
FBgn0264489;A5:3L:9813961-9820280:9813922-9820280:+	0.441461	0.041625	F_New_Sex_Specif.:101	FBgn0264489	CG43897
FBgn0265185;SE:2R:12951349-12951846:12951878-12952173:-	0.414596	0.011988	F_New_Sex_Specif.:101	FBgn0265185	CG44250
FBgn0265767;AF:X:23023317:23023431-23030190:23028438:23028597-23030190:+	-1	0	F_New_Sex_Specif.:101	FBgn0265767	zyd
FBgn0266375;A5:X:13321478-13325772:13321354-13325772:+	-0.713944	0.0294705	F_New_Sex_Specif.:101	FBgn0266375	IP3K2
FBgn0267790;SE:3R:9507386-9508291:9508429-9509436:-	-0.387306	0.014985	F_New_Sex_Specif.:101	FBgn0267790	rump
FBgn0001105;A3:X:15860322-15861140:15860322-15861224:+	0.408582	0.0314685	F_Sex_Specif.:38	FBgn0001105	Gbeta13F
FBgn0001280;A5:3R:30039406-30039473:30039406-30039477:-	-0.187579	0.0544456	F_Sex_Specif.:38	FBgn0001280	janA
FBgn0001961;RI:2L:13829346:13829643-13829710:13829741:-	-0.124085	0.0304695	F_Sex_Specif.:38	FBgn0001961	Arpc1
FBgn0003676;RI:3R:22491259:22491351-22491416:22491439:-	0.289647	0.0144855	F_Sex_Specif.:38	FBgn0003676	T-cp1
FBgn0004108;AF:3L:16766072:16766540-16773714:16773520:16773642-16773714:+	-0.429739	0.0544456	F_Sex_Specif.:38	FBgn0004108	Nrt
FBgn0010621;AF:2R:12174802:12175028-12175737:12175096:12175128-12175737:+	-0.19288	0.031968	F_Sex_Specif.:38	FBgn0010621	Cct5
FBgn0010622;RI:2R:23061420:23061594-23061683:23062593:-	0.622316	0.00949051	F_Sex_Specif.:38	FBgn0010622	l(2)06496
FBgn0014184;AF:2R:12168203-12170924:12171285:12168203-12174091:12174264:-	0.315231	0.0134865	F_Sex_Specif.:38	FBgn0014184	Oda
FBgn0015477;A3:2R:9175934-9176091:9175931-9176091:-	-0.913195	0.026973	F_Sex_Specif.:38	FBgn0015477	Rme-8
FBgn0016120;A5:3R:19095074-19095397:19095021-19095397:+	-0.0990508	0.027972	F_Sex_Specif.:38	FBgn0016120	ATPsyn-d
FBgn0024733;A5:3L:23095305-23095426:23095305-23095437:-	0.0546419	0.0314685	F_Sex_Specif.:38	FBgn0024733	RpL10
FBgn0025630;A5:X:2072725-2073134:2072697-2073134:+	-0.666667	0.0294705	F_Sex_Specif.:38	FBgn0025630	CG4061
FBgn0029676;RI:X:3790042:3790070-3790130:3790336:+	-0.56441	0.0104895	F_Sex_Specif.:38	FBgn0029676	HIP-R
FBgn0031384;AF:2L:2017540:2017851-2026768:2024012:2024265-2026768:+	-1	0	F_Sex_Specif.:38	FBgn0031384	CG4238
FBgn0031758;A3:2L:5970559-5970629:5970559-5970639:+	-0.666667	0.046953	F_Sex_Specif.:38	FBgn0031758	Ucp4B
FBgn0032305;A5:2L:10842273-10842381:10842273-10842385:-	0.377164	0.0384615	F_Sex_Specif.:38	FBgn0032305	CG6700
FBgn0032979;A3:2L:22167253-22167303:22167238-22167303:-	0.477982	0.0164835	F_Sex_Specif.:38	FBgn0032979	Clamp
FBgn0033725;A5:2R:12387517-12387913:12387427-12387913:+	0.245152	0.015984	F_Sex_Specif.:38	FBgn0033725	Cpr49Ac
FBgn0033725;SE:2R:12387517-12387913:12387939-12388300:+	0.227519	0.015984	F_Sex_Specif.:38	FBgn0033725	Cpr49Ac
FBgn0033762;A3:2R:12654058-12654111:12654058-12654126:+	-0.497771	0.040959	F_Sex_Specif.:38	FBgn0033762	ZnT49B
FBgn0033784;RI:2R:12935779:12936260-12936325:12936535:-	0.532398	0.0474525	F_Sex_Specif.:38	FBgn0033784	CG13322
FBgn0034068;A3:2R:16027278-16027337:16027263-16027337:-	0.609496	0.016983	F_Sex_Specif.:38	FBgn0034068	casp
FBgn0034246;A5:2R:17578495-17578554:17578495-17578557:-	1	0	F_Sex_Specif.:38	FBgn0034246	Dcr-2
FBgn0034962;A5:2R:24034432-24034688:24034420-24034688:+	0.508855	0.0549451	F_Sex_Specif.:38	FBgn0034962	MAN1
FBgn0035473;AF:3L:3909039-3909221:3909592:3909039-3909757:3909931:-	0.341264	0.031968	F_Sex_Specif.:38	FBgn0035473	mge
FBgn0035713;A5:3L:6751443-6752145:6751443-6752160:-	-0.333333	0.0549451	F_Sex_Specif.:38	FBgn0035713	velo
FBgn0037580;SE:3R:8344483-8344809:8345023-8345093:+	0.230502	0.0444555	F_Sex_Specif.:38	FBgn0037580	DppIII
FBgn0037680;A3:3R:9335252-9335497:9335252-9335500:+	-0.458491	0.0344655	F_Sex_Specif.:38	FBgn0037680	CG8121
FBgn0038271;RI:3R:14890231:14890261-14890334:14890426:+	-0.314206	0.0044955	F_Sex_Specif.:38	FBgn0038271	CG3731
FBgn0038811;A5:3R:20592493-20592557:20592493-20592561:-	-0.575088	0.0519481	F_Sex_Specif.:38	FBgn0038811	CG4159
FBgn0039359;A5:3R:25684516-25684959:25684516-25685018:-	-0.28078	0.0344655	F_Sex_Specif.:38	FBgn0039359	RpL27
FBgn0043456;A3:2L:10007178-10007252:10007178-10007255:+	-0.47221	0.017982	F_Sex_Specif.:38	FBgn0043456	CG4747
FBgn0046214;A5:3R:25123483-25123632:25123479-25123632:+	0.152245	0.047952	F_Sex_Specif.:38	FBgn0046214	vig2
FBgn0050104;A5:2R:17485131-17490937:17485029-17490937:+	-0.458321	0.017982	F_Sex_Specif.:38	FBgn0050104	NT5E-2
FBgn0051908;RI:2L:7026724:7026981-7027194:7027287:-	-0.208484	0.0354645	F_Sex_Specif.:38	FBgn0051908	CG31908
FBgn0053170;AF:3L:22864842:22864925-22865771:22865486:22865696-22865771:+	-0.393352	0.02997	F_Sex_Specif.:38	FBgn0053170	CG33170
FBgn0086254;SE:3L:11620665-11620923:11621103-11621214:-	0.378281	0.00899101	F_Sex_Specif.:38	FBgn0086254	CG6084
FBgn0260386;SE:3R:8250570-8257377:8257499-8258391:+	-0.615601	0.0524476	F_Sex_Specif.:38	FBgn0260386	mtg

## Sheet: S3c_CLAMP dep MSS_L3
Splicing_event	p-val	sex	gene_id	gene_name			Total Genes =140
FBgn0005672;SE:2L:19569226-19571572:19571767-19577186:-	0.0262238	M_New_Sex_Specif.:106	FBgn0005672	spi
FBgn0010246;AF:3L:1318480:1318769-1325995:1325117:1325260-1325995:+	0.0337163	M_New_Sex_Specif.:106	FBgn0010246	Myo61F
FBgn0033725;SE:2R:12387427-12387913:12387939-12388300:+	0.0174825	M_New_Sex_Specif.:106	FBgn0033725	Cpr49Ac
FBgn0053170;AF:3L:22864600:22864925-22865771:22865486:22865696-22865771:+	0.0444555	M_New_Sex_Specif.:106	FBgn0053170	CG33170
FBgn0263006;AF:2R:23932814-23933259:23933444:23932814-23935825:23935884:-	0.0536963	M_New_Sex_Specif.:106	FBgn0263006	Ca-P60A
FBgn0263006;AF:2R:23932814-23933691:23933740:23932814-23935580:23935680:-	0.0532801	M_New_Sex_Specif.:106	FBgn0263006	Ca-P60A
FBgn0265045;A5:2R:15951466-15951872:15951466-15951907:-	0.0431235	M_New_Sex_Specif.:106	FBgn0265045	Strn-Mlck
FBgn0265045;AF:2R:15951466-15951872:15952088:15951466-15952348:15952518:-	0.0262238	M_New_Sex_Specif.:106	FBgn0265045	Strn-Mlck
FBgn0000562;AF:2R:23744614-23745098:23745184:23744614-23746200:23746829:-	0.02997	M_New_Sex_Specif.:106	FBgn0000562	egl
FBgn0001256;A3:3L:13382835-13382911:13382835-13382914:+	0	M_New_Sex_Specif.:106	FBgn0001256	ImpL1
FBgn0002567;AF:2R:9179225-9179749:9180338:9179225-9185217:9186342:-	0.0539461	M_New_Sex_Specif.:106	FBgn0002567	ltd
FBgn0003137;SE:3R:28521700-28521815:28522231-28522482:-	0.034965	M_New_Sex_Specif.:106	FBgn0003137	Ppn
FBgn0003941;A5:2L:4227807-4228012:4227749-4228012:+	0.0494505	M_New_Sex_Specif.:106	FBgn0003941	RpL40
FBgn0005198;A3:3L:20135620-20135678:20135620-20135687:+	0.03996	M_New_Sex_Specif.:106	FBgn0005198	gig
FBgn0011653;A3:3L:4164799-4164885:4164796-4164885:-	0	M_New_Sex_Specif.:106	FBgn0011653	mas
FBgn0013764;AF:2R:24033572-24033679:24033768:24033572-24033823:24033943:-	0.0434565	M_New_Sex_Specif.:106	FBgn0013764	Chi
FBgn0014141;AF:3R:17094749-17095364:17095547:17094749-17098562:17098807:-	0.0124875	M_New_Sex_Specif.:106	FBgn0014141	cher
FBgn0015513;SE:3R:23795240-23796385:23796498-23797099:+	0.0414585	M_New_Sex_Specif.:106	FBgn0015513	mbc
FBgn0015791;AF:2L:14355145:14355473-14357341:14357041:14357271-14357341:+	0.0529471	M_New_Sex_Specif.:106	FBgn0015791	Rab14
FBgn0015926;A3:X:15328952-15329010:15328952-15329019:+	0	M_New_Sex_Specif.:106	FBgn0015926	dah
FBgn0016701;RI:2R:17573462:17573521-17573621:17573714:+	0.037962	M_New_Sex_Specif.:106	FBgn0016701	Rab4
FBgn0020236;A3:2R:15996365-15996895:15996314-15996895:-	0.03996	M_New_Sex_Specif.:106	FBgn0020236	ATPCL
FBgn0020236;AF:2R:15999970-16000095:16000287:15999970-16001188:16001290:-	0.03996	M_New_Sex_Specif.:106	FBgn0020236	ATPCL
FBgn0021847;A3:2R:6210855-6211596:6210825-6211596:-	0.031968	M_New_Sex_Specif.:106	FBgn0021847	l(2)k14710
FBgn0024315;AF:2R:16657439-16658747:16659158:16657439-16663515:16663960:-	0.040959	M_New_Sex_Specif.:106	FBgn0024315	Picot
FBgn0024321;SE:3R:14345184-14349922:14350003-14367193:-	0.0534466	M_New_Sex_Specif.:106	FBgn0024321	NK7.1
FBgn0025639;AF:X:654096-654865:654938:654096-655380:656033:-	0.0484515	M_New_Sex_Specif.:106	FBgn0025639	Hmt4-20
FBgn0025741;SE:4:1020015-1022242:1023680-1026963:-	0	M_New_Sex_Specif.:106	FBgn0025741	PlexA
FBgn0025865;A3:3R:21064111-21064295:21064108-21064295:-	0.040959	M_New_Sex_Specif.:106	FBgn0025865	Cortactin
FBgn0026238;AF:2R:5121652-5121983:5122247:5121652-5128226:5128321:-	0.0464535	M_New_Sex_Specif.:106	FBgn0026238	gus
FBgn0027111;A5:3L:267869-268220:267853-268220:+	0.0134865	M_New_Sex_Specif.:106	FBgn0027111	miple
FBgn0027528;A3:X:16745195-16745515:16745180-16745515:-	0.042957	M_New_Sex_Specif.:106	FBgn0027528	CG9634
FBgn0027528;AF:X:16745953-16746060:16746082:16745953-16751508:16751910:-	0.042957	M_New_Sex_Specif.:106	FBgn0027528	CG9634
FBgn0028494;AF:2R:17708045-17708609:17709087:17708045-17715706:17716493:-	0.010989	M_New_Sex_Specif.:106	FBgn0028494	CG6424
FBgn0028494;AF:2R:17708045-17708609:17709087:17708045-17715706:17717270:-	0.013986	M_New_Sex_Specif.:106	FBgn0028494	CG6424
FBgn0029891;A3:X:6684070-6684128:6684070-6684219:+	0.041958	M_New_Sex_Specif.:106	FBgn0029891	Pink1
FBgn0030051;A5:X:8572999-8573529:8572999-8573562:-	0.024975	M_New_Sex_Specif.:106	FBgn0030051	spirit
FBgn0030268;AF:X:11136095-11136619:11136778:11136095-11136867:11137118:-	0.032967	M_New_Sex_Specif.:106	FBgn0030268	Klp10A
FBgn0030357;AF:X:11922373-11922588:11922760:11922373-11924158:11924662:-	0.0244755	M_New_Sex_Specif.:106	FBgn0030357	Sclp
FBgn0030716;RI:X:15982364:15982689-15982762:15982944:-	0	M_New_Sex_Specif.:106	FBgn0030716	CG9170
FBgn0030742;A3:X:16329830-16329895:16329827-16329895:-	0.033966	M_New_Sex_Specif.:106	FBgn0030742	CG9919
FBgn0031047;RI:X:19638889:19639076-19639145:19639393:+	0.012987	M_New_Sex_Specif.:106	FBgn0031047	Rcd-1
FBgn0031053;AF:X:19661608-19662004:19662293:19661608-19662669:19663367:-	0.0534466	M_New_Sex_Specif.:106	FBgn0031053	CG14223
FBgn0031053;AF:X:19661608-19662004:19662293:19661608-19663619:19663971:-	0.0534466	M_New_Sex_Specif.:106	FBgn0031053	CG14223
FBgn0031496;A3:2L:3034977-3035021:3034968-3035021:-	0	M_New_Sex_Specif.:106	FBgn0031496	CG17258
FBgn0032010;AL:2L:8244160:8244501-8244970:8244545:8244732-8244970:-	0.044955	M_New_Sex_Specif.:106	FBgn0032010	CG8086
FBgn0032499;A3:2L:13287313-13287374:13287313-13287377:+	0.020979	M_New_Sex_Specif.:106	FBgn0032499	Uvrag
FBgn0032499;RI:2L:13286777:13286818-13286871:13287313:+	0.020979	M_New_Sex_Specif.:106	FBgn0032499	Uvrag
FBgn0032986;A3:2L:22240103-22240154:22240103-22240170:+	0.0534466	M_New_Sex_Specif.:106	FBgn0032986	CG3262
FBgn0033086;A5:2R:6669232-6669330:6669224-6669330:+	0.0519481	M_New_Sex_Specif.:106	FBgn0033086	CG9410
FBgn0033260;RI:2R:8102260:8102544-8102608:8102906:-	0.0184815	M_New_Sex_Specif.:106	FBgn0033260	Cul4
FBgn0033627;AF:2R:11366710:11367101-11368548:11368286:11368400-11368548:+	0.044955	M_New_Sex_Specif.:106	FBgn0033627	CG13204
FBgn0033639;AF:2R:11644964-11645410:11645913:11644964-11648346:11648514:-	0.0539461	M_New_Sex_Specif.:106	FBgn0033639	CG9003
FBgn0033807;A3:2R:13212962-13213023:13212932-13213023:-	0.0514486	M_New_Sex_Specif.:106	FBgn0033807	AQP
FBgn0033807;AF:2R:13213931-13214071:13214111:13213931-13214419:13214496:-	0.0514486	M_New_Sex_Specif.:106	FBgn0033807	AQP
FBgn0033996;RI:2R:15203961:15204175-15204235:15204466:+	0.0414585	M_New_Sex_Specif.:106	FBgn0033996	CG11807
FBgn0034091;AF:2R:16206079-16206172:16206238:16206079-16210190:16210397:-	0.0524476	M_New_Sex_Specif.:106	FBgn0034091	mrj
FBgn0034091;AF:2R:16206079-16210190:16210397:16206079-16221670:16221793:-	0.0524476	M_New_Sex_Specif.:106	FBgn0034091	mrj
FBgn0034091;SE:2R:16205031-16205320:16205580-16205710:-	0.0524476	M_New_Sex_Specif.:106	FBgn0034091	mrj
FBgn0034497;AF:2R:20280445-20280590:20280609:20280445-20280988:20281127:-	0.00899101	M_New_Sex_Specif.:106	FBgn0034497	CG9090
FBgn0034982;A3:2R:24137771-24137861:24137768-24137861:-	0.0164835	M_New_Sex_Specif.:106	FBgn0034982	CG4065
FBgn0035112;A3:3L:218195-218280:218195-218283:+	0.0474525	M_New_Sex_Specif.:106	FBgn0035112	CG13877
FBgn0035260;AF:3L:1674709:1675167-1698647:1688809:1689613-1698647:+	0	M_New_Sex_Specif.:106	FBgn0035260	CG7991
FBgn0035481;AF:3L:3962669-3963812:3963977:3962669-3964491:3964771:-	0.0424575	M_New_Sex_Specif.:106	FBgn0035481	CG12605
FBgn0035484;RI:3L:4024945:4025169-4025847:4026011:-	0.023976	M_New_Sex_Specif.:106	FBgn0035484	CG11594
FBgn0035491;AF:3L:4047456-4047593:4047673:4047456-4047699:4047735:-	0.0034965	M_New_Sex_Specif.:106	FBgn0035491	Dpy-30L2
FBgn0036180;RI:3L:11608676:11609188-11609286:11609465:-	0.040959	M_New_Sex_Specif.:106	FBgn0036180	CG6091
FBgn0036992;RI:3L:20439528:20439554-20439772:20439872:-	0.01998	M_New_Sex_Specif.:106	FBgn0036992	CG11796
FBgn0037135;A5:3L:21827035-21827094:21826752-21827094:+	0.0549451	M_New_Sex_Specif.:106	FBgn0037135	CG7414
FBgn0037181;A3:3L:22712672-22712738:22712672-22712753:+	0.0509491	M_New_Sex_Specif.:106	FBgn0037181	CG11370
FBgn0037262;RI:3R:4641963:4642008-4642284:4642428:+	0.0547786	M_New_Sex_Specif.:106	FBgn0037262	MED31
FBgn0037262;SE:3R:4642008-4642284:4642428-4642569:+	0.048951	M_New_Sex_Specif.:106	FBgn0037262	MED31
FBgn0037262;SE:3R:4642008-4642289:4642428-4642569:+	0.0547786	M_New_Sex_Specif.:106	FBgn0037262	MED31
FBgn0037440;AF:3R:6373380-6373460:6373574:6373380-6373814:6373912:-	0.0194805	M_New_Sex_Specif.:106	FBgn0037440	CG1041
FBgn0037592;AF:3R:8517868:8518391-8519606:8519041:8519169-8519606:+	0.048951	M_New_Sex_Specif.:106	FBgn0037592	CG11737
FBgn0037912;AF:3R:11561205-11562201:11562296:11561205-11563226:11563292:-	0.038961	M_New_Sex_Specif.:106	FBgn0037912	sea
FBgn0037978;RI:3R:12009290:12010143-12010242:12010434:-	0.0394605	M_New_Sex_Specif.:106	FBgn0037978	KLHL18
FBgn0038846;A5:3R:21016041-21016220:21016008-21016220:+	0.033966	M_New_Sex_Specif.:106	FBgn0038846	CG5697
FBgn0039045;AF:3R:23056326-23057433:23057547:23056326-23058884:23058958:-	0.0224775	M_New_Sex_Specif.:106	FBgn0039045	CG17119
FBgn0039116;A3:3R:23767870-23768009:23767870-23768079:+	0.030969	M_New_Sex_Specif.:106	FBgn0039116	CG10375
FBgn0039478;RI:3R:27058713:27058911-27059071:27059119:-	0	M_New_Sex_Specif.:106	FBgn0039478	Nep5
FBgn0039480;AF:3R:27084483-27086341:27086619:27084483-27087512:27087778:-	0	M_New_Sex_Specif.:106	FBgn0039480	Cpr97Ea
FBgn0039804;A5:3R:30828480-30833642:30828465-30833642:+	0	M_New_Sex_Specif.:106	FBgn0039804	CG15544
FBgn0039924;A5:4:1196477-1196708:1196477-1196758:-	0.0254745	M_New_Sex_Specif.:106	FBgn0039924	PIP4K
FBgn0041087;A3:2R:9415361-9416402:9415361-9416645:+	0.0499501	M_New_Sex_Specif.:106	FBgn0041087	wun2
FBgn0050460;A3:2R:17069757-17069899:17068215-17069899:-	0.0264735	M_New_Sex_Specif.:106	FBgn0050460	CG30460
FBgn0051361;AF:3R:12095630:12097016-12107139:12098086:12098656-12107139:+	0.047952	M_New_Sex_Specif.:106	FBgn0051361	dpr17
FBgn0052103;A5:3L:12414086-12414702:12414086-12414706:-	0.0519481	M_New_Sex_Specif.:106	FBgn0052103	CG32103
FBgn0052105;A3:3L:12330253-12334207:12330253-12334210:+	0	M_New_Sex_Specif.:106	FBgn0052105	CG32105
FBgn0052686;RI:X:10371717:10374277-10374342:10375316:-	0.036963	M_New_Sex_Specif.:106	FBgn0052686	CG32686
FBgn0053113;AF:2L:4994994-4995376:4995482:4994994-4997114:4997381:-	0.0519481	M_New_Sex_Specif.:106	FBgn0053113	Rtnl1
FBgn0053113;AF:2L:4994994-4995376:4995482:4994994-5008181:5009720:-	0.0519481	M_New_Sex_Specif.:106	FBgn0053113	Rtnl1
FBgn0053523;AF:3L:5926871:5927066-5928224:5927782:5927907-5928224:+	0.0344655	M_New_Sex_Specif.:106	FBgn0053523	Vap-33B
FBgn0053526;AF:2L:870465:870552-871341:871095:871274-871341:+	0.021978	M_New_Sex_Specif.:106	FBgn0053526	PNUTS
FBgn0259238;AF:2R:11295885-11296172:11296215:11295885-11297262:11297520:-	0.0314685	M_New_Sex_Specif.:106	FBgn0259238	CG42336
FBgn0259740;RI:3R:10851285:10851488-10851541:10851788:+	0.047952	M_New_Sex_Specif.:106	FBgn0259740	CG42394
FBgn0259740;RI:3R:10851285:10851488-10851549:10851788:+	0.0404595	M_New_Sex_Specif.:106	FBgn0259740	CG42394
FBgn0260388;A5:3L:16495536-16496053:16495536-16496139:-	0.034965	M_New_Sex_Specif.:106	FBgn0260388	CG42514
FBgn0261955;AF:X:6350629:6350954-6358902:6352282:6352481-6358902:+	0.0344655	M_New_Sex_Specif.:106	FBgn0261955	kdn
FBgn0263199;AF:3L:8985231-8985419:8985594:8985231-8985977:8986091:-	0.015984	M_New_Sex_Specif.:106	FBgn0263199	Galk
FBgn0263236;AF:3R:29248414-29248860:29248904:29248414-29250190:29250451:-	0	M_New_Sex_Specif.:106	FBgn0263236	SP1029
FBgn0263236;AF:3R:29248414-29248860:29248904:29248414-29250362:29250451:-	0	M_New_Sex_Specif.:106	FBgn0263236	SP1029
FBgn0263667;A3:2R:23901955-23902020:23901955-23902032:+	0.048951	M_New_Sex_Specif.:106	FBgn0263667	Lpt
FBgn0265575;AF:X:3865439-3866512:3866717:3865439-3867939:3868331:-	0.0304695	M_New_Sex_Specif.:106	FBgn0265575	yin
FBgn0266418;A5:3R:22667042-22667980:22667038-22667980:+	0.048951	M_New_Sex_Specif.:106	FBgn0266418	wake
FBgn0266418;SE:3R:22668042-22675948:22676198-22676909:+	0.048951	M_New_Sex_Specif.:106	FBgn0266418	wake
FBgn0003676;RI:3R:22491259:22491351-22491416:22491439:-	0.0114885	M_Sex_Specif.:55	FBgn0003676	T-cp1
FBgn0010621;AF:2R:12174802:12175028-12175737:12175096:12175128-12175737:+	0.0414585	M_Sex_Specif.:55	FBgn0010621	Cct5
FBgn0024733;A5:3L:23095305-23095426:23095305-23095437:-	0.015984	M_Sex_Specif.:55	FBgn0024733	RpL10
FBgn0032305;A5:2L:10842273-10842381:10842273-10842385:-	0.020979	M_Sex_Specif.:55	FBgn0032305	CG6700
FBgn0033725;A5:2R:12387517-12387913:12387427-12387913:+	0.0174825	M_Sex_Specif.:55	FBgn0033725	Cpr49Ac
FBgn0033725;RI:2R:12388518:12388533-12388923:12389086:+	0.0174825	M_Sex_Specif.:55	FBgn0033725	Cpr49Ac
FBgn0033725;SE:2R:12387517-12387913:12387939-12388300:+	0.0174825	M_Sex_Specif.:55	FBgn0033725	Cpr49Ac
FBgn0034246;A5:2R:17578495-17578554:17578495-17578557:-	0	M_Sex_Specif.:55	FBgn0034246	Dcr-2
FBgn0034962;A5:2R:24034432-24034688:24034420-24034688:+	0.032967	M_Sex_Specif.:55	FBgn0034962	MAN1
FBgn0035473;AF:3L:3909039-3909221:3909592:3909039-3909757:3909931:-	0.010989	M_Sex_Specif.:55	FBgn0035473	mge
FBgn0038811;A5:3R:20592493-20592557:20592493-20592561:-	0.046953	M_Sex_Specif.:55	FBgn0038811	CG4159
FBgn0053170;AF:3L:22864842:22864925-22865771:22865486:22865696-22865771:+	0.042957	M_Sex_Specif.:55	FBgn0053170	CG33170
FBgn0001125;AF:2L:1986105-1986797:1986955:1986105-1987585:1987758:-	0.0364635	M_Sex_Specif.:55	FBgn0001125	Got2
FBgn0002673;A5:2L:16261505-16261591:16261505-16261617:-	0.02997	M_Sex_Specif.:55	FBgn0002673	twe
FBgn0003741;A3:3L:16590930-16591004:16590755-16591004:-	0.0484515	M_Sex_Specif.:55	FBgn0003741	tra
FBgn0004855;A3:3R:14309122-14309178:14309122-14309185:+	0.0384615	M_Sex_Specif.:55	FBgn0004855	RpII15
FBgn0010235;AF:3L:12748682-12748807:12748898:12748682-12749963:12750056:-	0.0529471	M_Sex_Specif.:55	FBgn0010235	Klc
FBgn0011571;SE:X:16288957-16289027:16289158-16289226:+	0.0494505	M_Sex_Specif.:55	FBgn0011571	caz
FBgn0015756;RI:2L:11004006:11004055-11004129:11004153:-	0.00699301	M_Sex_Specif.:55	FBgn0015756	RpL9
FBgn0020521;AF:2R:24581245:24582078-24588747:24587707:24587786-24588747:+	0.0539461	M_Sex_Specif.:55	FBgn0020521	pio
FBgn0022893;RI:2L:21629667:21629776-21629885:21629932:-	0.00799201	M_Sex_Specif.:55	FBgn0022893	Df31
FBgn0024234;RI:2R:23851562:23851601-23851683:23853247:+	0.0514486	M_Sex_Specif.:55	FBgn0024234	gbb
FBgn0027348;AF:2L:14013004:14013138-14015787:14013746:14013917-14015787:+	0.018981	M_Sex_Specif.:55	FBgn0027348	bgm
FBgn0028491;A5:X:3872557-3873118:3872512-3873118:+	0.0194805	M_Sex_Specif.:55	FBgn0028491	CG2930
FBgn0029785;AF:X:5672480:5672522-5672998:5672734:5672875-5672998:+	0.0549451	M_Sex_Specif.:55	FBgn0029785	RpL35
FBgn0029870;A5:X:6366232-6366633:6366071-6366633:+	0.014985	M_Sex_Specif.:55	FBgn0029870	Marf
FBgn0031089;A5:X:20150236-20150598:20150125-20150598:+	0.003996	M_Sex_Specif.:55	FBgn0031089	CG9572
FBgn0031392;A5:2L:2152465-2152663:2152270-2152663:+	0.036963	M_Sex_Specif.:55	FBgn0031392	AIF
FBgn0032167;A5:2L:9944681-9947266:9944681-9947292:-	0.015984	M_Sex_Specif.:55	FBgn0032167	CG5853
FBgn0032479;SE:2L:13189618-13189692:13189756-13191904:-	0.0024975	M_Sex_Specif.:55	FBgn0032479	CG16974
FBgn0032482;A3:2L:13208777-13209436:13208777-13209493:+	0.0474525	M_Sex_Specif.:55	FBgn0032482	Pect
FBgn0032482;A3:2L:13208777-13209472:13208777-13209493:+	0.01998	M_Sex_Specif.:55	FBgn0032482	Pect
FBgn0032516;A5:2L:13386257-13386488:13386257-13386530:-	0.021978	M_Sex_Specif.:55	FBgn0032516	CG9293
FBgn0033715;A3:2R:12335376-12335432:12335376-12335441:+	0.0184815	M_Sex_Specif.:55	FBgn0033715	CG8490
FBgn0035195;AF:3L:1247817:1247947-1248256:1248020:1248188-1248256:+	0.031968	M_Sex_Specif.:55	FBgn0035195	Sac1
FBgn0035558;AF:3L:4542120:4542907-4551002:4550689:4550722-4551002:+	0.041958	M_Sex_Specif.:55	FBgn0035558	CG11357
FBgn0037643;SE:3R:8941189-8941314:8941316-8941408:+	0.014985	M_Sex_Specif.:55	FBgn0037643	skap
FBgn0037852;RI:3R:10881563:10881803-10881903:10882188:-	0.02997	M_Sex_Specif.:55	FBgn0037852	Tpc1
FBgn0038251;A5:3R:14659615-14659744:14659582-14659744:+	0.036963	M_Sex_Specif.:55	FBgn0038251	Hexim
FBgn0038389;RI:3R:15963884:15963897-15963976:15964097:+	0.00849151	M_Sex_Specif.:55	FBgn0038389	CG5516
FBgn0038683;AF:3R:19156546-19156659:19156812:19156546-19159610:19159878:-	0.0194805	M_Sex_Specif.:55	FBgn0038683	CG11779
FBgn0038771;AF:3R:20057374-20057442:20057490:20057374-20059567:20059750:-	0.043956	M_Sex_Specif.:55	FBgn0038771	CG4390
FBgn0050334;A3:2R:12441137-12441188:12441120-12441188:-	0.0324675	M_Sex_Specif.:55	FBgn0050334	CG30334
FBgn0051055;RI:3R:27686939:27687879-27687943:27688134:-	0.0394605	M_Sex_Specif.:55	FBgn0051055	CG31055
FBgn0058196;AF:2R:1521559-1526741:1526943:1521559-1527005:1527095:-	0.018981	M_Sex_Specif.:55	FBgn0058196	Maf1
FBgn0063485;A3:3L:16679869-16680812:16679473-16680812:-	0.023976	M_Sex_Specif.:55	FBgn0063485	Lasp
FBgn0085405;AL:3R:22457477-22458321:22459421:22457477-22459842:22460749:+	0.02997	M_Sex_Specif.:55	FBgn0085405	CG34376
FBgn0085468;AL:2R:13159103-13159534:13159649:13159103-13159731:13160190:+	0.023976	M_Sex_Specif.:55	FBgn0085468	CG34439
FBgn0086347;RI:2L:10505926:10506106-10506684:10506779:-	0.011988	M_Sex_Specif.:55	FBgn0086347	Myo31DF
FBgn0086904;AF:2R:12760521-12760727:12760792:12760521-12760805:12760999:-	0.026973	M_Sex_Specif.:55	FBgn0086904	Nacalpha
FBgn0259722;RI:X:254876:254921-254984:255524:+	0.0524476	M_Sex_Specif.:55	FBgn0259722	CG42376
FBgn0261561;AF:3R:5813609:5813937-5814939:5814667:5814849-5814939:+	0.00699301	M_Sex_Specif.:55	FBgn0261561	CG42675
FBgn0263144;A3:2R:6221276-6233256:6221276-6233266:+	0.0324675	M_Sex_Specif.:55	FBgn0263144	bin3
FBgn0264672;RI:2L:2381097:2381125-2381189:2382296:+	0.017982	M_Sex_Specif.:55	FBgn0264672	Eogt
FBgn0266570;A3:X:4319503-4319566:4319503-4319570:+	0.0174825	M_Sex_Specif.:55	FBgn0266570	CG2982
