# Supplementary material for: Sex-specific splicing occurs genome-wide during early Drosophila embryogenesis
Source: eLife. 2023 Jul 19;12:e87865. doi: 10.7554/eLife.87865 (PMC10400075; doi:10.7554/eLife.87865)
Supplement: Supplementary file 5. — (a–b) List of all CLAMP (chromatin linked adapter for MSL proteins)-dependent differentially expressed genes in Drosophila male (a) and female (b) third instar larvae (L3). [file elife-87865-supp5.xlsx]

## Sheet: S5a_Diff Exp genes in Males_L3
Gene	baseMean	log2FoldChange	lfcSE	stat	pvalue	padj
FBgn0031512	425.407	-11.7115	1.269	-9.22893	2.7336e-20	9.83656e-19
FBgn0263405	201.422	-10.633	1.22057	-8.7115	2.99887e-18	8.98456e-17
FBgn0030629	456.777	-9.9603	1.06025	-9.39433	5.75824e-21	2.27315e-19
FBgn0038523	6416.9	-9.92191	0.726072	-13.6652	1.6385e-42	3.18724e-40
FBgn0004588	75.5644	-9.2182	1.71883	-5.36307	8.18198e-08	7.24875e-07
FBgn0003378	47270.2	-9.20564	1.14123	-8.06643	7.23844e-16	1.75053e-14
FBgn0003377	94069.1	-9.09631	0.895295	-10.1601	2.98684e-24	1.52431e-22
FBgn0266261	2832.19	-9.09546	1.08294	-8.39886	4.50852e-17	1.21513e-15
FBgn0004594	68.2191	-9.07047	1.32121	-6.86527	6.63635e-12	1.06931e-10
FBgn0259950	4779.5	-8.96041	0.812819	-11.0239	2.93157e-28	2.00753e-26
FBgn0040565	4433.83	-8.92089	0.671248	-13.29	2.64581e-40	4.55284e-38
FBgn0032132	60.5454	-8.89907	1.25426	-7.09509	1.29264e-12	2.2503e-11
FBgn0265455	59.1458	-8.86542	1.28615	-6.89297	5.46381e-12	8.89991e-11
FBgn0038509	1361.7	-8.71472	1.52421	-5.71754	1.08077e-08	1.10481e-07
FBgn0266940	49.6932	-8.61357	1.23351	-6.983	2.8895e-12	4.81775e-11
FBgn0267158	48.8644	-8.59003	1.26866	-6.77096	1.27931e-11	1.98049e-10
FBgn0267681	48.1254	-8.56759	1.30336	-6.57349	4.91503e-11	6.97352e-10
FBgn0003375	108018	-8.50984	0.574569	-14.8108	1.24718e-49	3.63906e-47
FBgn0034785	88.4467	-8.48072	1.29487	-6.54947	5.77409e-11	8.1322e-10
FBgn0003373	157798	-8.48046	0.974966	-8.69821	3.3717e-18	1.00791e-16
FBgn0262839	45.0924	-8.47351	1.27328	-6.65485	2.83585e-11	4.17813e-10
FBgn0264824	44.7024	-8.46133	1.3623	-6.21107	5.26249e-10	6.39214e-09
FBgn0050042	44.5451	-8.45588	1.29516	-6.52885	6.62762e-11	9.20868e-10
FBgn0265160	42.2818	-8.38103	1.34562	-6.22838	4.71269e-10	5.78717e-09
FBgn0263207	42.226	-8.37825	1.33355	-6.28268	3.3278e-10	4.18611e-09
FBgn0263117	589.549	-8.33424	0.574301	-14.512	1.01736e-47	2.67746e-45
FBgn0263407	40.7243	-8.32641	1.30546	-6.37814	1.79255e-10	2.33816e-09
FBgn0000639	168484	-8.30956	0.820687	-10.1251	4.2742e-24	2.12475e-22
FBgn0033936	2800.19	-8.28242	0.531326	-15.5882	8.75793e-55	3.177e-52
FBgn0004592	46129.6	-8.22974	0.793747	-10.3682	3.4592e-25	1.88737e-23
FBgn0031747	11459.2	-8.22961	0.533448	-15.4272	1.07419e-53	3.79415e-51
FBgn0052762	37.7796	-8.21813	2.94339	-2.79206	0.00523731	0.01559
FBgn0040801	37.6139	-8.21153	1.26973	-6.46713	9.98814e-11	1.35006e-09
FBgn0040682	2242.4	-8.20724	0.54617	-15.0269	4.89519e-51	1.49325e-48
FBgn0085222	3508.57	-8.20549	1.30354	-6.29477	3.07854e-10	3.89445e-09
FBgn0265425	36.7738	-8.17968	1.30278	-6.27861	3.41617e-10	4.28522e-09
FBgn0266226	36.6955	-8.17687	1.31762	-6.20579	5.44235e-10	6.60463e-09
FBgn0265835	71.0231	-8.16263	1.40284	-5.81864	5.9327e-09	6.30972e-08
FBgn0051958	256.294	-8.14507	0.828902	-9.82634	8.67143e-23	3.94535e-21
FBgn0263246	125.839	-8.0957	1.08543	-7.45852	8.75001e-14	1.72456e-12
FBgn0036416	10098.1	-8.05331	1.22993	-6.54776	5.84045e-11	8.20844e-10
FBgn0024294	1028.6	-7.95987	0.432201	-18.4171	9.58705e-76	1.28677e-72
FBgn0063083	707.744	-7.95508	0.989016	-8.04342	8.7363e-16	2.09017e-14
FBgn0266158	30.8357	-7.92559	1.31075	-6.04661	1.47926e-09	1.71457e-08
FBgn0003372	8950.89	-7.78212	0.967319	-8.04504	8.62194e-16	2.06786e-14
FBgn0028947	27.1652	-7.74228	2.79004	-2.77498	0.00552056	0.0162886
FBgn0085308	3391.33	-7.74008	0.389797	-19.8567	9.64716e-88	3.2371e-84
FBgn0262892	26.8266	-7.72519	1.30513	-5.91912	3.23668e-09	3.55796e-08
FBgn0051698	486.554	-7.71241	1.33186	-5.79069	7.00975e-09	7.32748e-08
FBgn0085309	25.9432	-7.67602	1.33932	-5.73129	9.96716e-09	1.0267e-07
FBgn0265828	25.4715	-7.64897	1.27758	-5.98705	2.13677e-09	2.42228e-08
FBgn0264890	25.4416	-7.64792	1.33663	-5.72178	1.05414e-08	1.08005e-07
FBgn0265063	25.1213	-7.63033	1.31058	-5.82212	5.81069e-09	6.19469e-08
FBgn0264371	25.0886	-7.62833	1.27207	-5.9968	2.01244e-09	2.29881e-08
FBgn0034462	335.054	-7.58579	1.20567	-6.29176	3.13885e-10	3.96328e-09
FBgn0052631	24.3139	-7.58193	1.30893	-5.79248	6.93527e-09	7.27228e-08
FBgn0037677	690.666	-7.5645	0.573344	-13.1937	9.54374e-40	1.50701e-37
FBgn0262616	130.068	-7.55459	0.956512	-7.89806	2.83282e-15	6.45536e-14
FBgn0267120	23.8173	-7.55264	1.26709	-5.96059	2.51323e-09	2.81574e-08
FBgn0267935	23.6733	-7.54405	1.26115	-5.98189	2.20557e-09	2.49395e-08
FBgn0266229	23.3657	-7.52552	1.28538	-5.85469	4.77915e-09	5.16056e-08
FBgn0004589	44.4359	-7.48352	1.68681	-4.4365	9.14313e-06	5.57702e-05
FBgn0259949	22.3623	-7.46147	1.32585	-5.62769	1.82636e-08	1.80181e-07
FBgn0085325	1705.47	-7.4604	0.499968	-14.9218	2.37861e-50	7.0946e-48
FBgn0250817	43.146	-7.44187	1.33267	-5.5842	2.34782e-08	2.26871e-07
FBgn0262024	21.6748	-7.41682	1.35251	-5.48373	4.16459e-08	3.87368e-07
FBgn0265826	76.3091	-7.37707	1.09598	-6.73103	1.68461e-11	2.58115e-10
FBgn0263496	74.6161	-7.3487	1.07842	-6.81434	9.46998e-12	1.48836e-10
FBgn0032972	73.0862	-7.32225	1.10128	-6.64888	2.95341e-11	4.3418e-10
FBgn0267620	20.0974	-7.30835	1.38549	-5.27492	1.32812e-07	1.1405e-06
FBgn0262023	1069.16	-7.30006	1.105	-6.60639	3.93813e-11	5.67751e-10
FBgn0052821	38.2578	-7.26549	1.24537	-5.83399	5.41159e-09	5.80611e-08
FBgn0033997	67.6932	-7.20744	1.078	-6.68596	2.29414e-11	3.42895e-10
FBgn0036417	3462.28	-7.1989	1.14962	-6.26199	3.80098e-10	4.73253e-09
FBgn0266535	18.1349	-7.15895	1.30305	-5.494	3.92938e-08	3.66761e-07
FBgn0264943	17.8359	-7.1361	1.49329	-4.77877	1.7637e-06	1.23551e-05
FBgn0266070	17.7222	-7.12581	1.42504	-5.00041	5.72082e-07	4.37521e-06
FBgn0263211	17.3405	-7.09497	1.2849	-5.5218	3.35547e-08	3.16494e-07
FBgn0264914	17.3106	-7.09268	1.30679	-5.42757	5.71275e-08	5.19137e-07
FBgn0266984	17.1189	-7.07632	1.2982	-5.45087	5.01254e-08	4.61126e-07
FBgn0265920	16.6685	-7.03773	1.31936	-5.33421	9.59599e-08	8.37979e-07
FBgn0265679	16.5829	-7.03101	1.29053	-5.44818	5.08883e-08	4.67504e-07
FBgn0263498	16.5906	-7.0306	1.30154	-5.40176	6.59903e-08	5.9325e-07
FBgn0266973	58.8147	-7.02201	1.22561	-5.72939	1.0079e-08	1.03742e-07
FBgn0266415	57.4175	-6.97972	1.16377	-5.99752	2.00355e-09	2.2906e-08
FBgn0265921	15.1415	-6.89909	1.32348	-5.21282	1.85989e-07	1.54956e-06
FBgn0264378	29.259	-6.87777	1.27102	-5.41123	6.25929e-08	5.64598e-07
FBgn0262963	14.7621	-6.86273	1.29591	-5.29568	1.18574e-07	1.02347e-06
FBgn0266963	14.5431	-6.84182	1.36957	-4.99561	5.86497e-07	4.47016e-06
FBgn0267077	14.5268	-6.84018	1.4033	-4.87436	1.09164e-06	7.95439e-06
FBgn0000527	11740.3	-6.82265	1.09569	-6.22683	4.75977e-10	5.8343e-09
FBgn0028939	2524.18	-6.81242	0.913788	-7.45515	8.97676e-14	1.76666e-12
FBgn0034456	51.3413	-6.79343	1.16926	-5.81004	6.24586e-09	6.60094e-08
FBgn0267190	51.2874	-6.79305	1.10171	-6.16589	7.00857e-10	8.42158e-09
FBgn0266010	13.9495	-6.78095	1.40921	-4.81189	1.4951e-06	1.06176e-05
FBgn0266783	99.4351	-6.77472	0.845338	-8.01422	1.10843e-15	2.6285e-14
FBgn0267144	13.7799	-6.7639	1.31019	-5.16254	2.43619e-07	1.98775e-06
FBgn0265980	13.7212	-6.75785	1.40553	-4.80806	1.52402e-06	1.08001e-05
FBgn0261634	13.6755	-6.75155	2.18324	-3.09244	0.00198515	0.00680581
FBgn0051205	26.789	-6.74871	1.44452	-4.67193	2.98389e-06	2.01255e-05
FBgn0035434	1714.95	-6.70345	0.749827	-8.94	3.89182e-19	1.24372e-17
FBgn0266968	13.1821	-6.69874	1.32155	-5.06886	4.00208e-07	3.1579e-06
FBgn0267929	12.8924	-6.66728	1.33405	-4.99777	5.79979e-07	4.42551e-06
FBgn0267020	12.7524	-6.65184	1.30849	-5.08359	3.70358e-07	2.93271e-06
FBgn0266152	12.6957	-6.64628	1.45483	-4.56843	4.91402e-06	3.17318e-05
FBgn0263388	91.4551	-6.62303	0.891078	-7.4326	1.06481e-13	2.08337e-12
FBgn0261814	12.2302	-6.59194	1.37357	-4.79913	1.59359e-06	1.12575e-05
FBgn0267308	11.8391	-6.5443	1.41752	-4.61674	3.89819e-06	2.56101e-05
FBgn0267924	11.4992	-6.50214	1.33262	-4.87921	1.06513e-06	7.77813e-06
FBgn0264941	11.4614	-6.49878	1.41391	-4.59632	4.30017e-06	2.80966e-05
FBgn0029816	188.268	-6.46858	1.2884	-5.02061	5.1507e-07	3.97771e-06
FBgn0061188	11.2334	-6.46767	1.41805	-4.56095	5.09219e-06	3.27495e-05
FBgn0046253	618.604	-6.46189	0.482547	-13.3912	6.80748e-41	1.20224e-38
FBgn0265854	40.1454	-6.45942	1.1635	-5.55173	2.82861e-08	2.69834e-07
FBgn0033723	11.0978	-6.45151	1.34856	-4.78398	1.71855e-06	1.20518e-05
FBgn0039795	1231.48	-6.36278	0.787918	-8.07543	6.72373e-16	1.63193e-14
FBgn0267816	10.3291	-6.34846	1.43669	-4.41882	9.92402e-06	5.98922e-05
FBgn0267312	10.1783	-6.32758	1.44209	-4.38779	1.14507e-05	6.82767e-05
FBgn0266240	10.0456	-6.30625	1.38383	-4.55711	5.18631e-06	3.33225e-05
FBgn0267711	9.9033	-6.28763	1.36501	-4.6063	4.09902e-06	2.68507e-05
FBgn0267310	9.87932	-6.28218	1.5613	-4.02368	5.72946e-05	0.000296342
FBgn0032505	9.79564	-6.27046	1.52908	-4.1008	4.11728e-05	0.000220255
FBgn0261932	509.267	-6.26371	0.623872	-10.0401	1.01612e-23	4.92359e-22
FBgn0266252	9.56317	-6.23753	1.56069	-3.99665	6.42447e-05	0.000327743
FBgn0265585	67.3227	-6.2274	0.978928	-6.36145	1.99861e-10	2.58434e-09
FBgn0266888	9.36662	-6.20495	1.41075	-4.39832	1.09091e-05	6.53085e-05
FBgn0267090	9.29247	-6.19599	1.42003	-4.36327	1.28132e-05	7.58287e-05
FBgn0001077	33.4473	-6.18972	1.13546	-5.4513	5.00018e-08	4.60305e-07
FBgn0031976	96.0181	-6.17555	0.940585	-6.56565	5.18066e-11	7.32717e-10
FBgn0261566	9.08108	-6.16211	1.61225	-3.82206	0.00013234	0.000627327
FBgn0261925	17.7817	-6.15268	1.31866	-4.66584	3.07355e-06	2.06472e-05
FBgn0032709	93.118	-6.14702	1.07527	-5.71674	1.08586e-08	1.10832e-07
FBgn0001254	5934.22	-6.13692	0.370316	-16.5721	1.10893e-61	5.95363e-59
FBgn0265080	8.89912	-6.1338	1.4961	-4.09986	4.13408e-05	0.000221066
FBgn0267950	17.5777	-6.1331	1.38481	-4.42884	9.47418e-06	5.75917e-05
FBgn0033137	826.374	-6.12564	0.681537	-8.98799	2.51797e-19	8.22896e-18
FBgn0033866	77.045	-6.11544	0.993283	-6.15679	7.4232e-10	8.89592e-09
FBgn0263616	31.5097	-6.10721	1.17149	-5.21319	1.85622e-07	1.54747e-06
FBgn0032280	7335.6	-6.08085	1.1471	-5.30108	1.15119e-07	9.9621e-07
FBgn0265641	8.49485	-6.06639	1.41148	-4.29789	1.72429e-05	9.92856e-05
FBgn0264428	62.1456	-6.0595	0.853637	-7.09846	1.26159e-12	2.1991e-11
FBgn0265017	8.41757	-6.05371	1.52403	-3.97218	7.1219e-05	0.000359226
FBgn0262356	60.2257	-6.04482	0.85454	-7.07377	1.50777e-12	2.6012e-11
FBgn0005638	1194.23	-6.02941	0.864637	-6.97334	3.09514e-12	5.15421e-11
FBgn0267111	123.721	-6.0287	0.848206	-7.10759	1.18087e-12	2.06914e-11
FBgn0262969	29.9934	-6.02595	1.10517	-5.4525	4.96653e-08	4.5752e-07
FBgn0267592	119.73	-6.01841	0.778967	-7.72615	1.10851e-14	2.40361e-13
FBgn0266882	8.13022	-6.00326	1.43999	-4.16896	3.05998e-05	0.000168255
FBgn0266029	8.12709	-6.00109	1.5165	-3.95721	7.58314e-05	0.000380489
FBgn0263095	15.8789	-5.98563	1.45022	-4.1274	3.66886e-05	0.000198402
FBgn0266155	8.02537	-5.9843	1.45809	-4.10422	4.05685e-05	0.000217369
FBgn0267209	15.3277	-5.93698	1.39722	-4.24912	2.14607e-05	0.000121641
FBgn0263328	7.76383	-5.93522	1.51135	-3.92711	8.59745e-05	0.000426283
FBgn0265422	100.295	-5.93289	1.24306	-4.7728	1.81682e-06	1.26875e-05
FBgn0041233	27.4691	-5.89969	1.12902	-5.22549	1.73697e-07	1.45801e-06
FBgn0264601	7.47251	-5.87928	1.53977	-3.81829	0.000134378	0.000635975
FBgn0264961	7.46816	-5.87775	1.67173	-3.51597	0.000438153	0.0018241
FBgn0266157	7.40904	-5.86931	1.53872	-3.81442	0.000136506	0.000644906
FBgn0043577	78.7805	-5.85517	2.1013	-2.78645	0.0053289	0.0158205
FBgn0265944	7.18882	-5.82587	1.49011	-3.90968	9.24202e-05	0.000455718
FBgn0267433	1276.3	-5.81499	0.897126	-6.48179	9.0639e-11	1.23383e-09
FBgn0265306	25.8753	-5.81166	1.12801	-5.15212	2.57564e-07	2.09136e-06
FBgn0266153	7.01441	-5.78961	1.39737	-4.14323	3.42447e-05	0.000186615
FBgn0286880	6.94759	-5.77458	1.40598	-4.10716	4.00546e-05	0.000214963
FBgn0265881	6.85291	-5.7561	1.76468	-3.26185	0.00110688	0.0040951
FBgn0267196	6.7521	-5.73267	2.15937	-2.65479	0.00793583	0.0220482
FBgn0264365	6.71308	-5.72423	1.70325	-3.36076	0.000777269	0.00302304
FBgn0267922	6.65924	-5.71475	1.41125	-4.04943	5.13435e-05	0.000267936
FBgn0266207	6.62518	-5.70763	1.55953	-3.65984	0.000252371	0.00112015
FBgn0024249	6.55318	-5.69129	1.44143	-3.94835	7.86908e-05	0.000393366
FBgn0265712	6.53942	-5.68849	1.4737	-3.86	0.000113388	0.000549331
FBgn0264599	6.5217	-5.68466	1.59601	-3.5618	0.000368318	0.00156541
FBgn0032585	6.52523	-5.68288	1.7472	-3.25256	0.00114369	0.00419646
FBgn0266228	23.895	-5.67534	1.16112	-4.88781	1.01965e-06	7.47042e-06
FBgn0001224	34566.8	-5.66115	0.417811	-13.5495	7.9742e-42	1.529e-39
FBgn0267594	6.41542	-5.65869	1.49934	-3.77412	0.000160571	0.000743935
FBgn0039180	6.39082	-5.65394	1.61346	-3.50423	0.000457934	0.00189295
FBgn0032462	6.38686	-5.65265	1.4633	-3.86294	0.000112031	0.000544022
FBgn0034623	675.942	-5.65006	0.303628	-18.6085	2.74286e-77	4.09052e-74
FBgn0038356	138.38	-5.64645	1.41057	-4.00296	6.25549e-05	0.00032034
FBgn0263657	22.9228	-5.63714	1.14823	-4.90942	9.13465e-07	6.74397e-06
FBgn0086074	6.26483	-5.62749	1.48904	-3.77926	0.000157292	0.00073051
FBgn0004593	6.23054	-5.61769	1.42065	-3.95431	7.67545e-05	0.00038469
FBgn0004865	3452.51	-5.6175	0.478072	-11.7503	7.03448e-32	6.69623e-30
FBgn0039616	6.2197	-5.61548	1.41953	-3.95589	7.62517e-05	0.000382312
FBgn0036591	6.19251	-5.6099	1.42973	-3.92374	8.71833e-05	0.000431958
FBgn0266074	6.18067	-5.6081	1.79309	-3.12762	0.00176225	0.00611977
FBgn0040637	22.4549	-5.60354	1.12356	-4.98733	6.12187e-07	4.64837e-06
FBgn0265756	6.1586	-5.60272	1.4652	-3.82387	0.000131373	0.000623512
FBgn0267440	12.1857	-5.59953	1.41464	-3.95828	7.549e-05	0.00037906
FBgn0032311	6.14088	-5.59862	1.53552	-3.64609	0.000266262	0.00117365
FBgn0265744	6.06047	-5.57894	1.52681	-3.65398	0.000258211	0.00114342
FBgn0032110	261.405	-5.57882	1.65362	-3.3737	0.000741642	0.00290298
FBgn0050375	62.7873	-5.57556	1.14216	-4.88157	1.05242e-06	7.6937e-06
FBgn0039299	14616.2	-5.56597	0.6325	-8.79995	1.36877e-18	4.20403e-17
FBgn0031619	110.691	-5.56554	1.03988	-5.35211	8.69323e-08	7.66123e-07
FBgn0263612	21.7731	-5.56295	1.16498	-4.77513	1.79588e-06	1.25543e-05
FBgn0053265	551.009	-5.55779	0.880051	-6.31531	2.69628e-10	3.43028e-09
FBgn0053290	5.95716	-5.55406	1.4348	-3.87098	0.0001084	0.000528109
FBgn0266875	5.95303	-5.55314	1.44666	-3.83859	0.000123744	0.00059212
FBgn0267008	5.91638	-5.54491	1.50783	-3.6774	0.00023562	0.00105276
FBgn0037114	28318.2	-5.54015	0.984855	-5.62535	1.85135e-08	1.82056e-07
FBgn0265948	21.4247	-5.53815	1.15249	-4.80538	1.54455e-06	1.09398e-05
FBgn0265885	61.4815	-5.53503	1.04737	-5.28472	1.25899e-07	1.08391e-06
FBgn0266941	5.84285	-5.52604	1.43616	-3.84779	0.000119187	0.000573997
FBgn0036605	5.80894	-5.51842	1.48252	-3.72233	0.000197396	0.000899644
FBgn0003114	5.79397	-5.51491	1.5128	-3.64551	0.000266864	0.00117592
FBgn0028569	253.097	-5.51232	0.758121	-7.27103	3.56766e-13	6.6323e-12
FBgn0265551	97.5685	-5.5066	1.31044	-4.20211	2.64438e-05	0.000147029
FBgn0036590	5.7325	-5.49823	1.52246	-3.61141	0.000304534	0.00132237
FBgn0266039	5.72165	-5.49577	1.5084	-3.64343	0.000269025	0.00118324
FBgn0266231	5.7134	-5.49356	1.734	-3.16814	0.00153416	0.00542309
FBgn0261807	78.0389	-5.49025	1.18883	-4.6182	3.8708e-06	2.54426e-05
FBgn0039161	2592.56	-5.48613	1.05149	-5.21748	1.81376e-07	1.51584e-06
FBgn0267550	5.65538	-5.47993	1.64467	-3.33194	0.000862443	0.00330735
FBgn0267772	5.65484	-5.47766	1.53153	-3.57659	0.000348103	0.00148797
FBgn0265162	20.4372	-5.47494	1.19509	-4.58121	4.62287e-06	3.00185e-05
FBgn0263625	5.63315	-5.47258	1.48477	-3.68582	0.000227965	0.00102297
FBgn0039852	351.555	-5.4686	1.17946	-4.63654	3.54286e-06	2.3471e-05
FBgn0266072	97.535	-5.46749	0.857767	-6.3741	1.84041e-10	2.3936e-09
FBgn0265952	5.6162	-5.46642	1.98773	-2.75008	0.00595799	0.0173655
FBgn0034196	263.171	-5.46164	1.26317	-4.32377	1.53383e-05	8.91604e-05
FBgn0039851	413.836	-5.45585	1.22311	-4.46063	8.17196e-06	5.036e-05
FBgn0264948	5.52984	-5.44551	1.48613	-3.66422	0.00024809	0.00110187
FBgn0037665	192.57	-5.43795	1.15827	-4.69488	2.66763e-06	1.81659e-05
FBgn0085202	57.442	-5.43278	1.02985	-5.27531	1.3253e-07	1.13881e-06
FBgn0266839	5.45774	-5.4282	1.58123	-3.43289	0.000597175	0.00239907
FBgn0264261	19.6297	-5.4266	1.29362	-4.19488	2.73019e-05	0.000151361
FBgn0040796	10.8646	-5.42628	1.33267	-4.07175	4.66611e-05	0.000245988
FBgn0030643	5.45339	-5.42454	1.54537	-3.5102	0.000447778	0.00186013
FBgn0037570	20.0144	-5.41203	1.22769	-4.40829	1.04191e-05	6.26263e-05
FBgn0267135	5.37215	-5.40484	1.52928	-3.53423	0.000408959	0.0017164
FBgn0263004	19.4586	-5.39382	1.13522	-4.75134	2.02074e-06	1.3995e-05
FBgn0263497	5.33098	-5.3917	1.5104	-3.56971	0.000357376	0.00152324
FBgn0051851	168.463	-5.38806	1.55263	-3.47028	0.000519913	0.00212493
FBgn0267756	5.30434	-5.38746	1.7034	-3.16276	0.00156279	0.00550691
FBgn0037178	19.0741	-5.36954	1.16638	-4.60361	4.15222e-06	2.71859e-05
FBgn0032853	5.23202	-5.36738	1.51932	-3.53274	0.000411274	0.00172288
FBgn0265374	37.2724	-5.35873	0.970931	-5.51916	3.40621e-08	3.21054e-07
FBgn0034122	244.631	-5.35377	1.26258	-4.24034	2.23183e-05	0.000125829
FBgn0266893	5.14351	-5.342	1.5173	-3.52072	0.000430375	0.00179506
FBgn0286892	5.13405	-5.33953	1.56366	-3.41477	0.000638369	0.0025431
FBgn0051742	668.839	-5.33307	1.94099	-2.7476	0.0060034	0.0174789
FBgn0266233	5.1132	-5.33133	1.58736	-3.3586	0.000783372	0.00304237
FBgn0266774	5.08601	-5.32438	1.63515	-3.2562	0.00112914	0.00415215
FBgn0041224	18.8256	-5.32296	1.13979	-4.67014	3.01001e-06	2.02813e-05
FBgn0262033	102.165	-5.31373	1.37529	-3.86373	0.00011167	0.000542858
FBgn0262789	44.0972	-5.30925	1.10296	-4.81362	1.48221e-06	1.05372e-05
FBgn0037422	5.02607	-5.30604	1.63705	-3.24123	0.00119017	0.00434323
FBgn0047330	5.00482	-5.30354	2.10986	-2.51369	0.0119477	0.0309757
FBgn0265640	4.97482	-5.29514	1.57553	-3.36086	0.000777012	0.00302291
FBgn0265897	37.0136	-5.29322	1.06748	-4.95861	7.09978e-07	5.34455e-06
FBgn0262529	164	-5.28761	0.886407	-5.96522	2.44308e-09	2.74632e-08
FBgn0038914	4.94933	-5.28713	1.96641	-2.68872	0.0071726	0.0203103
FBgn0266902	4.94604	-5.28432	1.48263	-3.56416	0.000365029	0.0015534
FBgn0265307	17.7401	-5.28016	1.31561	-4.01348	5.98297e-05	0.000308622
FBgn0259870	4.92969	-5.28011	1.50621	-3.50555	0.000455656	0.00188527
FBgn0051634	267.994	-5.26661	1.00851	-5.22217	1.76836e-07	1.48158e-06
FBgn0264956	4.83982	-5.25273	1.53153	-3.42973	0.000604175	0.00242501
FBgn0261395	265.13	-5.2422	1.0405	-5.03817	4.70002e-07	3.65279e-06
FBgn0266003	81.3158	-5.23682	1.29758	-4.03582	5.44116e-05	0.000282738
FBgn0053679	4.77491	-5.23491	1.73628	-3.01502	0.00256966	0.00853225
FBgn0262880	141.96	-5.22364	0.473421	-11.0338	2.62485e-28	1.8067e-26
FBgn0036161	281.421	-5.20814	0.457425	-11.3858	4.92232e-30	3.95613e-28
FBgn0264363	17.2037	-5.18895	1.16252	-4.46352	8.06237e-06	4.97074e-05
FBgn0051659	4.61355	-5.18262	1.99211	-2.60157	0.00927979	0.0251724
FBgn0266781	16.62	-5.1753	1.24773	-4.14776	3.35741e-05	0.000183407
FBgn0264786	16.4808	-5.16555	1.25909	-4.10261	4.08512e-05	0.000218709
FBgn0264367	9.01667	-5.15636	1.58479	-3.25365	0.00113934	0.00418391
FBgn0052117	210.956	-5.15336	1.66589	-3.09345	0.00197841	0.00678442
FBgn0036709	4.46434	-5.1369	1.53135	-3.3545	0.000795094	0.00308165
FBgn0037179	4.44678	-5.13189	1.51399	-3.38965	0.000699827	0.0027599
FBgn0038691	345.977	-5.1236	1.81786	-2.81848	0.00482519	0.01457
FBgn0262098	178.746	-5.11184	1.21319	-4.21356	2.51375e-05	0.000140406
FBgn0011872	4.37171	-5.10601	1.62804	-3.13629	0.00171097	0.00596485
FBgn0266244	30.9342	-5.07988	0.950468	-5.34461	9.06113e-08	7.94892e-07
FBgn0263085	4.26312	-5.07234	1.77352	-2.86003	0.004236	0.0130823
FBgn0053246	4.24671	-5.06438	1.632	-3.10318	0.00191453	0.00659232
FBgn0267146	15.2988	-5.04442	1.18797	-4.24625	2.17376e-05	0.000122951
FBgn0266980	15.0399	-5.03788	1.32867	-3.79167	0.000149639	0.000701031
FBgn0041229	4.17302	-5.03775	1.63958	-3.07258	0.00212218	0.00722207
FBgn0026386	4.14758	-5.03304	1.70207	-2.95701	0.00310634	0.0100321
FBgn0260718	74.5287	-5.0268	0.807435	-6.22564	4.79593e-10	5.87327e-09
FBgn0263049	22.8416	-5.02265	1.04618	-4.80096	1.57909e-06	1.11726e-05
FBgn0264562	2186.06	-5.0057	0.40921	-12.2326	2.08177e-34	2.25334e-32
FBgn0265368	42.6761	-5.00543	1.14741	-4.36238	1.28657e-05	7.61054e-05
FBgn0036497	729.095	-5.00542	1.20631	-4.14936	3.33411e-05	0.000182421
FBgn0031729	75.8559	-4.99883	1.37187	-3.6438	0.000268645	0.00118249
FBgn0267235	4.03998	-4.99495	1.69868	-2.94049	0.00327697	0.0105173
FBgn0265862	4.0238	-4.98933	1.77109	-2.8171	0.00484589	0.0146134
FBgn0265711	14.6982	-4.9893	1.20502	-4.14043	3.46661e-05	0.000188682
FBgn0085273	2517.26	-4.98556	1.49174	-3.34211	0.000831441	0.00320491
FBgn0264346	28.9915	-4.98012	0.926379	-5.3759	7.61998e-08	6.78218e-07
FBgn0031026	54.7553	-4.96691	1.2038	-4.12601	3.69106e-05	0.000199522
FBgn0039744	60.9767	-4.9623	1.29637	-3.82783	0.000129278	0.000615089
FBgn0267255	3.93888	-4.95513	1.89775	-2.61106	0.0090261	0.0245937
FBgn0050074	156.874	-4.94924	0.514036	-9.62819	6.0792e-22	2.59032e-20
FBgn0265698	14.2653	-4.94197	1.18279	-4.17824	2.93769e-05	0.000162396
FBgn0028520	591.064	-4.94172	1.31322	-3.76306	0.000167849	0.000775513
FBgn0266834	3.89017	-4.93775	1.56988	-3.1453	0.00165919	0.00580393
FBgn0037143	3.8752	-4.93278	1.55089	-3.18061	0.00146965	0.00523367
FBgn0267593	7.74941	-4.93145	1.36723	-3.60691	0.000309869	0.0013412
FBgn0025680	88.5163	-4.902	0.719123	-6.81663	9.32003e-12	1.47169e-10
FBgn0263335	13.8311	-4.89396	1.16885	-4.187	2.82668e-05	0.000156323
FBgn0264353	7.4955	-4.88489	1.44465	-3.38136	0.000721273	0.00283151
FBgn0262680	3.73369	-4.88004	1.66224	-2.93583	0.00332662	0.0106588
FBgn0051741	63.7696	-4.87784	1.33851	-3.64424	0.000268186	0.00118132
FBgn0265716	3.70369	-4.86642	2.00766	-2.42393	0.0153534	0.0380619
FBgn0032090	197.81	-4.86067	1.71485	-2.83447	0.00459022	0.01398
FBgn0031364	62.2277	-4.84075	1.3245	-3.65478	0.000257406	0.00114023
FBgn0050209	3.61938	-4.83505	1.70505	-2.83572	0.0045723	0.0139318
FBgn0037827	205.978	-4.83113	1.7267	-2.7979	0.00514355	0.0153654
FBgn0039093	3.58647	-4.81992	2.01552	-2.3914	0.0167843	0.0409301
FBgn0267714	7.14964	-4.80547	1.49815	-3.20759	0.00133851	0.00481131
FBgn0038716	2771.12	-4.80457	0.826739	-5.81147	6.19282e-09	6.55004e-08
FBgn0286199	350.172	-4.80232	0.527247	-9.1083	8.36804e-20	2.85791e-18
FBgn0265500	60.2861	-4.79491	1.35472	-3.53941	0.000401029	0.00168734
FBgn0052984	12.7701	-4.79078	1.29337	-3.7041	0.000212144	0.000959878
FBgn0052487	332.048	-4.78627	1.37522	-3.48035	0.000500755	0.00205163
FBgn0265085	48.3449	-4.7854	1.26474	-3.7837	0.000154514	0.000720099
FBgn0266038	12.5731	-4.77787	1.40746	-3.39469	0.000687076	0.00271233
FBgn0288811	3.47116	-4.77578	1.75292	-2.72447	0.00644039	0.018542
FBgn0265148	70.9398	-4.77376	1.42732	-3.34457	0.000824113	0.00318035
FBgn0265855	3.42916	-4.75872	1.98626	-2.39582	0.0165832	0.0405722
FBgn0262530	139.032	-4.75711	1.06805	-4.45402	8.4276e-06	5.18164e-05
FBgn0033856	292.336	-4.75642	0.771756	-6.16311	7.13278e-10	8.56316e-09
FBgn0265614	6.8788	-4.75588	1.3585	-3.50082	0.000463826	0.00191435
FBgn0032898	3.42206	-4.75258	1.60662	-2.95812	0.00309523	0.0100058
FBgn0003938	3.39366	-4.7419	1.72078	-2.75568	0.00585708	0.0171137
FBgn0264516	91.7534	-4.73445	0.883238	-5.36033	8.3069e-08	7.34489e-07
FBgn0038458	161.218	-4.73414	1.26877	-3.73129	0.000190505	0.000871197
FBgn0042198	271.314	-4.73012	1.82331	-2.59424	0.00947992	0.0256067
FBgn0037036	3.35822	-4.72803	1.74475	-2.70986	0.00673125	0.0192596
FBgn0265815	3.36059	-4.72572	2.03221	-2.32541	0.0200501	0.0475043
FBgn0265963	35.1822	-4.72508	1.2339	-3.8294	0.000128459	0.000612059
FBgn0266007	3.35387	-4.72211	1.77257	-2.66399	0.00772206	0.0215704
FBgn0262981	6.71561	-4.72148	1.39006	-3.39659	0.000682312	0.00269908
FBgn0266944	3.3379	-4.71987	1.79029	-2.63637	0.00837977	0.0230572
FBgn0267248	3.34715	-4.71966	1.8222	-2.59008	0.00959524	0.0258553
FBgn0264429	35.3728	-4.71885	1.07806	-4.37717	1.20231e-05	7.13727e-05
FBgn0266146	115.964	-4.70835	0.983442	-4.78763	1.68764e-06	1.18719e-05
FBgn0035873	3.316	-4.70729	1.89276	-2.487	0.0128825	0.0329789
FBgn0040733	11.9973	-4.70386	1.37707	-3.41584	0.000635848	0.00253471
FBgn0263340	3.29828	-4.69972	1.61813	-2.90442	0.00367938	0.0115926
FBgn0265678	3.27109	-4.68914	1.63229	-2.87275	0.0040692	0.0126369
FBgn0051700	3.26437	-4.68652	1.63908	-2.85924	0.00424652	0.0131027
FBgn0266873	17.7444	-4.68552	1.13519	-4.12753	3.66679e-05	0.00019837
FBgn0267261	3.25215	-4.68164	1.66324	-2.81477	0.00488124	0.0146991
FBgn0266180	3.2494	-4.68055	1.66208	-2.81608	0.00486133	0.0146561
FBgn0037500	397.331	-4.67358	1.45802	-3.20542	0.00134864	0.00484513
FBgn0267213	65.7405	-4.67035	0.776702	-6.01305	1.82068e-09	2.09043e-08
FBgn0262795	23.1365	-4.66785	1.09848	-4.24935	2.14387e-05	0.000121568
FBgn0264985	11.8091	-4.66755	1.24193	-3.7583	0.000171068	0.000789846
FBgn0053725	3.21015	-4.66331	2.01858	-2.31019	0.0208774	0.0490747
FBgn0263774	140.757	-4.65981	1.65195	-2.8208	0.00479047	0.0144815
FBgn0046323	169.987	-4.65389	1.33776	-3.47888	0.000503515	0.00206231
FBgn0266221	11.7206	-4.65325	1.21863	-3.81842	0.000134307	0.000635975
FBgn0265929	3.18396	-4.64864	1.6308	-2.85053	0.00436468	0.0133903
FBgn0031721	300.819	-4.64578	1.47509	-3.1495	0.00163551	0.00573154
FBgn0051636	428.548	-4.64345	0.829468	-5.59811	2.16707e-08	2.10924e-07
FBgn0038003	3.16915	-4.64281	1.92848	-2.4075	0.0160622	0.0394992
FBgn0263981	3.16624	-4.64152	1.74334	-2.66243	0.00775778	0.0216341
FBgn0031129	2280.41	-4.64057	1.28333	-3.61603	0.000299154	0.00130183
FBgn0038218	295.553	-4.6386	1.38243	-3.3554	0.000792517	0.00307255
FBgn0039041	191.487	-4.63705	1.75948	-2.63547	0.00840214	0.0231093
FBgn0036881	3.14868	-4.63445	1.63237	-2.8391	0.00452415	0.0138101
FBgn0265879	3.14455	-4.63263	1.68893	-2.74294	0.00608919	0.0176788
FBgn0037572	290.353	-4.63011	1.16562	-3.97224	7.12014e-05	0.000359226
FBgn0032385	174.765	-4.6297	1.73384	-2.67019	0.00758078	0.0212598
FBgn0003140	222.126	-4.62957	1.78665	-2.59119	0.00956433	0.0257931
FBgn0038089	76.8674	-4.62366	0.965844	-4.78717	1.69149e-06	1.18873e-05
FBgn0053856	17.3822	-4.62143	0.968556	-4.77146	1.82895e-06	1.27456e-05
FBgn0036160	265.108	-4.61618	1.34753	-3.42565	0.000613326	0.0024588
FBgn0052945	242.667	-4.61542	1.42238	-3.24485	0.00117511	0.00429413
FBgn0265509	3.10515	-4.61529	1.93959	-2.37951	0.0173356	0.0421061
FBgn0038090	270.962	-4.6086	1.83907	-2.50594	0.0122128	0.0315412
FBgn0260643	94.2308	-4.60331	1.5559	-2.95862	0.00309023	0.00999928
FBgn0032065	259.573	-4.60284	1.83649	-2.50633	0.0121992	0.0315122
FBgn0265271	303.77	-4.6011	1.38651	-3.31848	0.0009051	0.00344729
FBgn0039029	104.163	-4.59754	1.57871	-2.91221	0.00358882	0.0113527
FBgn0262992	3.06964	-4.5957	1.64973	-2.78574	0.00534059	0.0158517
FBgn0038124	108.957	-4.59298	1.60713	-2.85788	0.00426479	0.0131531
FBgn0032968	242.334	-4.59221	0.925587	-4.9614	6.99876e-07	5.27738e-06
FBgn0035161	1007.78	-4.58966	1.77206	-2.59002	0.00959701	0.0258553
FBgn0051797	103.367	-4.58593	1.57473	-2.91221	0.00358886	0.0113527
FBgn0265817	21.8131	-4.57802	1.08412	-4.22282	2.41266e-05	0.000135153
FBgn0003983	3.02627	-4.57746	1.69451	-2.70135	0.00690577	0.0196417
FBgn0266002	3.02627	-4.57746	1.69451	-2.70135	0.00690577	0.0196417
FBgn0264873	16.4908	-4.57567	1.12604	-4.06351	4.8341e-05	0.000253253
FBgn0264359	3.02077	-4.57511	1.69212	-2.70377	0.00685582	0.0195215
FBgn0003319	209.969	-4.57342	0.411571	-11.1121	1.09544e-28	7.82075e-27
FBgn0265986	3.01527	-4.57223	1.88849	-2.4211	0.0154737	0.0382483
FBgn0037180	36.8627	-4.57026	1.21495	-3.7617	0.000168765	0.000779479
FBgn0034076	180.954	-4.56062	0.630165	-7.23719	4.58092e-13	8.43417e-12
FBgn0262572	16.975	-4.55974	1.20501	-3.78397	0.000154347	0.000719572
FBgn0266832	6.01077	-4.55641	1.41537	-3.21924	0.00128529	0.00463867
FBgn0285912	11.2842	-4.55578	1.3802	-3.30082	0.000964029	0.00363359
FBgn0083946	243.527	-4.55465	0.736839	-6.18134	6.35603e-10	7.67872e-09
FBgn0266587	2.95395	-4.54023	1.69748	-2.67468	0.00747998	0.021021
FBgn0286723	731.311	-4.53771	0.766896	-5.91699	3.27895e-09	3.60148e-08
FBgn0265305	16.0641	-4.53635	1.13254	-4.00547	6.18945e-05	0.000317807
FBgn0053775	2.91867	-4.52479	1.68307	-2.68841	0.00717937	0.0203244
FBgn0267917	2.89148	-4.51218	1.86048	-2.42527	0.0152968	0.0379438
FBgn0266732	5.8308	-4.50714	1.62725	-2.76979	0.00560923	0.0165052
FBgn0034510	59.2242	-4.50265	1.41574	-3.18042	0.00147062	0.00523574
FBgn0040743	16.4521	-4.50136	1.08622	-4.14407	3.41195e-05	0.000186159
FBgn0266915	15.5006	-4.49422	1.23116	-3.65039	0.00026184	0.00115644
FBgn0264547	20.6165	-4.48817	1.04491	-4.29528	1.74472e-05	0.000100333
FBgn0028561	349.834	-4.48573	1.24803	-3.59424	0.000325336	0.00140137
FBgn0038486	614.475	-4.48447	1.6802	-2.66902	0.00760738	0.0212943
FBgn0053309	393.917	-4.48224	1.57274	-2.84995	0.00437264	0.0134117
FBgn0261627	187.185	-4.47933	1.25195	-3.57789	0.000346385	0.0014811
FBgn0287216	2.83017	-4.4787	1.67873	-2.6679	0.00763259	0.0213471
FBgn0032265	10.4211	-4.47686	1.22916	-3.64221	0.000270312	0.00118838
FBgn0266004	39.3027	-4.47481	1.26021	-3.55084	0.000383998	0.00162331
FBgn0264084	38.796	-4.45418	1.24397	-3.58062	0.000342786	0.00146852
FBgn0042131	394.53	-4.45259	1.48946	-2.98939	0.00279534	0.00917785
FBgn0266883	10.1925	-4.45244	1.29254	-3.44472	0.000571657	0.00231177
FBgn0264366	20.1283	-4.45202	1.04342	-4.26674	1.98347e-05	0.000113141
FBgn0038078	328.305	-4.45091	0.979643	-4.5434	5.53535e-06	3.52947e-05
FBgn0051615	10.4656	-4.44551	1.1984	-3.70954	0.000207636	0.000942197
FBgn0038361	301.7	-4.43664	0.920383	-4.82043	1.43249e-06	1.02054e-05
FBgn0263841	209.114	-4.43543	1.81498	-2.44379	0.0145339	0.0364081
FBgn0039376	540.604	-4.43168	1.37968	-3.2121	0.00131767	0.00474405
FBgn0085274	155.206	-4.42904	1.27826	-3.4649	0.000530438	0.00216465
FBgn0039373	427.119	-4.42708	1.45642	-3.0397	0.00236812	0.00793434
FBgn0032111	634.564	-4.42649	1.2458	-3.55312	0.00038069	0.00161034
FBgn0263343	106.621	-4.42471	1.62277	-2.72665	0.00639816	0.0184362
FBgn0267131	19.5438	-4.42241	1.17006	-3.77964	0.000157055	0.000729915
FBgn0266831	9.95334	-4.41281	1.25669	-3.51146	0.000445656	0.00185189
FBgn0053826	29.7506	-4.4107	0.873182	-5.05129	4.3883e-07	3.43439e-06
FBgn0267794	170.739	-4.40928	1.35192	-3.26148	0.00110831	0.00409687
FBgn0085199	91.8296	-4.40798	1.58996	-2.77238	0.00556478	0.0163975
FBgn0040816	292.409	-4.40393	1.51498	-2.90692	0.00365007	0.0115246
FBgn0263623	2.68057	-4.40231	1.71403	-2.5684	0.0102168	0.0271598
FBgn0051609	195.501	-4.4021	1.79794	-2.44842	0.0143484	0.0360239
FBgn0031757	564.286	-4.39872	1.21835	-3.6104	0.000305724	0.00132668
FBgn0267712	5.42125	-4.39805	1.44545	-3.04268	0.00234482	0.0078641
FBgn0011270	1759.62	-4.39541	1.27393	-3.45027	0.00056003	0.00227229
FBgn0039083	1050.02	-4.39333	1.22143	-3.59687	0.000322068	0.00138908
FBgn0265588	14.9814	-4.3906	1.0397	-4.22294	2.41137e-05	0.000135138
FBgn0051784	441.622	-4.39019	1.42991	-3.07025	0.00213882	0.00727317
FBgn0040367	237.337	-4.39006	0.477601	-9.1919	3.85966e-20	1.37049e-18
FBgn0263403	19.2938	-4.3828	1.00568	-4.35804	1.31231e-05	7.75258e-05
FBgn0037037	116.837	-4.37953	1.6588	-2.64017	0.00828634	0.022847
FBgn0263618	95.2003	-4.37697	0.862135	-5.0769	3.83644e-07	3.03255e-06
FBgn0037995	678.254	-4.375	1.71886	-2.54529	0.0109188	0.0286851
FBgn0046999	34.9842	-4.36746	1.56731	-2.7866	0.0053265	0.0158169
FBgn0035875	52.8468	-4.3623	0.846384	-5.15405	2.54924e-07	2.07118e-06
FBgn0051294	504.323	-4.35722	1.05207	-4.14158	3.44927e-05	0.000187814
FBgn0039810	86.2011	-4.35327	0.964173	-4.51503	6.33072e-06	3.99112e-05
FBgn0035568	1028.75	-4.35118	1.60077	-2.71818	0.00656416	0.0188418
FBgn0052745	182.448	-4.35088	0.709034	-6.13635	8.44414e-10	1.00565e-08
FBgn0265878	57.7452	-4.35058	0.766113	-5.67877	1.35664e-08	1.36601e-07
FBgn0287670	9.57732	-4.34988	1.22819	-3.54171	0.000397542	0.00167398
FBgn0038485	27.3641	-4.34718	1.2303	-3.53344	0.000410187	0.00171994
FBgn0266865	5.21469	-4.34317	1.41925	-3.06018	0.00221202	0.00747854
FBgn0266021	37.6632	-4.34295	0.804919	-5.39551	6.83301e-08	6.12643e-07
FBgn0262514	257.568	-4.34248	1.88305	-2.30608	0.0211059	0.0495242
FBgn0267069	2.57176	-4.34204	1.74883	-2.48282	0.0130345	0.033273
FBgn0037413	46.5262	-4.34038	0.810558	-5.35481	8.56465e-08	7.55288e-07
FBgn0037418	2.56626	-4.33927	1.74622	-2.48495	0.0129568	0.0331314
FBgn0267271	2.56626	-4.33927	1.74622	-2.48495	0.0129568	0.0331314
FBgn0051949	497.227	-4.33806	1.45055	-2.99064	0.00278395	0.00914494
FBgn0266959	2.56351	-4.3377	1.86094	-2.33092	0.0197576	0.046919
FBgn0260969	32.6547	-4.33695	0.855995	-5.06656	4.05062e-07	3.19245e-06
FBgn0038386	70.1709	-4.33359	1.51438	-2.86162	0.00421475	0.0130287
FBgn0085318	126.211	-4.33253	1.69814	-2.55133	0.0107311	0.0282862
FBgn0266250	2.54182	-4.3266	1.85303	-2.33488	0.0195496	0.0464833
FBgn0262592	92.1422	-4.32552	1.29633	-3.33674	0.000847659	0.00325717
FBgn0264433	112.699	-4.32514	1.67207	-2.5867	0.0096899	0.0260272
FBgn0035005	815.164	-4.32242	1.76304	-2.45168	0.014219	0.0357594
FBgn0039685	145287	-4.32232	1.14198	-3.78493	0.000153752	0.000717546
FBgn0035273	628.993	-4.31953	1.15097	-3.75293	0.000174778	0.000805865
FBgn0265676	18.2502	-4.31919	1.16772	-3.69882	0.000216606	0.000978226
FBgn0037284	71.8413	-4.31625	1.07819	-4.00323	6.24826e-05	0.000320337
FBgn0263026	114.491	-4.31178	1.12103	-3.84627	0.000119932	0.000576652
FBgn0038423	652.886	-4.31065	1.5698	-2.74599	0.00603295	0.0175459
FBgn0032632	812.527	-4.3066	1.36154	-3.16304	0.0015613	0.0055031
FBgn0262827	5.0854	-4.30568	1.47387	-2.92134	0.00348527	0.0110851
FBgn0262025	95.1039	-4.30466	1.31617	-3.27059	0.00107322	0.00398583
FBgn0266978	51.7439	-4.29971	1.44199	-2.98179	0.00286564	0.00937199
FBgn0266031	34.9316	-4.29891	1.29277	-3.32534	0.000883096	0.0033769
FBgn0051948	2990.31	-4.29819	1.78363	-2.40979	0.0159615	0.0392877
FBgn0028901	366.681	-4.29808	1.58801	-2.70658	0.00679801	0.0194093
FBgn0052087	534.666	-4.28517	1.47717	-2.90094	0.0037204	0.0117054
FBgn0051391	694.766	-4.2835	1.20208	-3.5634	0.000366078	0.00155688
FBgn0261055	18.641	-4.28179	0.903811	-4.73748	2.16392e-06	1.49327e-05
FBgn0265663	2.46691	-4.28116	1.72065	-2.4881	0.0128427	0.0329021
FBgn0267123	59.2242	-4.27542	1.47794	-2.89282	0.00381804	0.0119593
FBgn0038127	713.836	-4.27169	1.53384	-2.78497	0.00535328	0.0158824
FBgn0033680	469.031	-4.26974	1.15413	-3.69954	0.000215992	0.000976109
FBgn0039241	13211.6	-4.26863	0.461621	-9.24705	2.30784e-20	8.37183e-19
FBgn0265444	135.742	-4.2677	0.784652	-5.43897	5.35909e-08	4.89984e-07
FBgn0053910	38.3215	-4.26724	1.32961	-3.20939	0.00133018	0.00478396
FBgn0262360	152.387	-4.26623	1.23197	-3.46292	0.000534352	0.00217665
FBgn0263385	50.5355	-4.26506	1.47365	-2.89421	0.00380115	0.0119175
FBgn0038567	332.881	-4.26476	1.56694	-2.72172	0.00649427	0.0186771
FBgn0032965	58.7963	-4.26445	1.47955	-2.88225	0.00394842	0.0123103
FBgn0266358	17.5684	-4.26257	1.1769	-3.62185	0.000292508	0.00127593
FBgn0266763	8.98246	-4.26168	1.31509	-3.24061	0.00119276	0.00435033
FBgn0035709	1019.45	-4.26155	1.16228	-3.66654	0.000245853	0.00109411
FBgn0085211	71.2155	-4.24695	1.22596	-3.4642	0.000531818	0.0021683
FBgn0265423	90.6139	-4.24543	1.63294	-2.59987	0.00932594	0.0252874
FBgn0085461	73.3853	-4.22595	1.56153	-2.70628	0.0068041	0.0194184
FBgn0039077	13.3973	-4.22548	1.07253	-3.93973	8.15736e-05	0.000406566
FBgn0265309	8.69785	-4.22494	1.43196	-2.95046	0.00317302	0.0102187
FBgn0266773	33.2877	-4.22456	1.27278	-3.31917	0.000902863	0.00344072
FBgn0036421	488.544	-4.2222	1.66811	-2.53113	0.0113696	0.0297124
FBgn0265011	312.381	-4.21886	0.789225	-5.34557	9.01313e-08	7.91199e-07
FBgn0265765	25.166	-4.21662	1.1831	-3.56403	0.000365202	0.00155364
FBgn0283627	2.35122	-4.21175	1.7768	-2.37041	0.0177682	0.0429781
FBgn0038979	2424.06	-4.21121	1.31583	-3.20042	0.00137228	0.00491559
FBgn0004431	1296.88	-4.21109	0.323882	-13.0019	1.19277e-38	1.70312e-36
FBgn0260459	233.024	-4.20974	0.716371	-5.87648	4.19092e-09	4.54303e-08
FBgn0005626	9236.26	-4.20852	0.599366	-7.02162	2.19309e-12	3.72604e-11
FBgn0262812	104.329	-4.20803	1.66895	-2.52136	0.0116902	0.0304435
FBgn0265157	16.8777	-4.20471	1.20131	-3.50009	0.000465096	0.001919
FBgn0030326	14982.3	-4.2037	0.665272	-6.31876	2.63671e-10	3.36086e-09
FBgn0266682	24.8919	-4.2036	1.22814	-3.42273	0.000619954	0.00248093
FBgn0032109	496.134	-4.20196	1.53705	-2.73378	0.00626122	0.0181039
FBgn0036156	417.412	-4.20098	1.55373	-2.7038	0.00685521	0.0195215
FBgn0032419	144.075	-4.19939	1.45466	-2.88686	0.00389108	0.0121541
FBgn0265842	4.7462	-4.19806	1.66146	-2.52673	0.0115131	0.030023
FBgn0262106	93.1109	-4.19565	1.20141	-3.49226	0.00047895	0.00197192
FBgn0265591	129.637	-4.19484	1.18786	-3.53141	0.000413351	0.00172943
FBgn0002531	154456	-4.19408	0.420609	-9.97145	2.03236e-23	9.67319e-22
FBgn0028880	373.838	-4.19349	1.61443	-2.59751	0.00939029	0.0254206
FBgn0085259	50.4737	-4.1921	0.941393	-4.45308	8.46458e-06	5.19962e-05
FBgn0036585	4.72727	-4.19164	1.51057	-2.77488	0.00552229	0.0162901
FBgn0053868	55.813	-4.1853	1.47723	-2.8332	0.00460847	0.0140197
FBgn0035069	264.687	-4.18401	1.52399	-2.74544	0.00604306	0.0175715
FBgn0010401	13.2367	-4.18347	1.17122	-3.5719	0.000354406	0.00151347
FBgn0005778	668.346	-4.18097	1.66604	-2.50953	0.0120892	0.0312702
FBgn0036031	1028.38	-4.17984	1.31893	-3.16911	0.00152909	0.00540801
FBgn0263404	63.3442	-4.17881	1.53433	-2.72354	0.00645857	0.0185864
FBgn0259864	8.53504	-4.17606	1.23506	-3.38126	0.000721531	0.00283169
FBgn0051501	430.079	-4.16892	1.56117	-2.67038	0.00757651	0.0212522
FBgn0034592	120.975	-4.16775	1.72116	-2.42148	0.0154577	0.0382227
FBgn0265648	962.223	-4.16692	1.42286	-2.92856	0.00340536	0.0108644
FBgn0036679	47.392	-4.16591	1.42878	-2.9157	0.00354889	0.0112519
FBgn0265825	8.39408	-4.16583	1.34576	-3.09552	0.00196467	0.00674248
FBgn0266726	8.42607	-4.16582	1.31402	-3.17028	0.00152293	0.00539191
FBgn0036708	390.791	-4.16357	0.988181	-4.21336	2.51596e-05	0.000140471
FBgn0035724	1461.05	-4.16335	1.14568	-3.63397	0.000279093	0.00122378
FBgn0050177	596.635	-4.1626	1.55636	-2.67457	0.00748241	0.0210234
FBgn0036592	8.40889	-4.16242	1.2904	-3.22567	0.00125677	0.00454672
FBgn0284420	8.32419	-4.16106	1.43155	-2.90668	0.00365287	0.0115308
FBgn0033278	113.667	-4.15556	1.30442	-3.18576	0.00144373	0.00514544
FBgn0287213	43.1307	-4.15115	1.39196	-2.98223	0.00286155	0.00936318
FBgn0265893	8.35253	-4.15001	1.29909	-3.19455	0.00140048	0.00500439
FBgn0264263	62.1427	-4.14957	1.53223	-2.70819	0.00676506	0.0193453
FBgn0261996	115.574	-4.14783	1.71712	-2.41557	0.0157106	0.0387625
FBgn0039704	564.555	-4.14664	0.258214	-16.0589	4.94995e-58	2.07619e-55
FBgn0038512	16.3274	-4.14531	1.12282	-3.69189	0.000222596	0.00100292
FBgn0031423	361.137	-4.14043	1.52569	-2.71381	0.00665138	0.0190555
FBgn0085424	75.1342	-4.13928	0.52031	-7.95542	1.78523e-15	4.15996e-14
FBgn0031756	25.7868	-4.13881	1.42212	-2.91032	0.00361062	0.0114135
FBgn0040510	391.59	-4.12984	1.71128	-2.41331	0.0158082	0.038989
FBgn0266935	2.21522	-4.12718	1.79106	-2.30432	0.0212047	0.0496992
FBgn0037191	432.644	-4.12394	1.57806	-2.61329	0.00896748	0.0244587
FBgn0052279	471.714	-4.12377	0.929519	-4.43645	9.14545e-06	5.57702e-05
FBgn0051693	462.789	-4.12005	1.38413	-2.97663	0.00291432	0.00950109
FBgn0032869	2652.86	-4.11831	1.29033	-3.19167	0.00141453	0.00504807
FBgn0038008	422.375	-4.11779	1.64942	-2.49651	0.0125423	0.0322619
FBgn0032894	497.262	-4.11715	1.69293	-2.43197	0.0150169	0.0373669
FBgn0264789	156.404	-4.11434	0.932759	-4.41093	1.02927e-05	6.19501e-05
FBgn0038448	261.556	-4.11336	0.907688	-4.53169	5.85134e-06	3.7179e-05
FBgn0021738	21.2292	-4.11259	0.926775	-4.43753	9.09983e-06	5.55678e-05
FBgn0034104	155.318	-4.11227	1.3919	-2.95442	0.00313255	0.010107
FBgn0265064	8.16903	-4.11144	1.24867	-3.29265	0.000992477	0.0037272
FBgn0266278	27.151	-4.11108	1.26215	-3.2572	0.00112516	0.00414205
FBgn0032374	414.034	-4.11096	1.55978	-2.6356	0.00839885	0.023105
FBgn0033725	70000.4	-4.10683	0.793963	-5.17257	2.30892e-07	1.89544e-06
FBgn0262874	24.6738	-4.10446	0.901181	-4.55454	5.25012e-06	3.36243e-05
FBgn0267490	93.4739	-4.10002	1.66714	-2.45932	0.0139201	0.0351261
FBgn0038122	398.119	-4.09969	1.46105	-2.80599	0.00501627	0.0150421
FBgn0051128	416.498	-4.09952	1.57061	-2.61014	0.00905046	0.024635
FBgn0262891	89.5691	-4.09663	1.65703	-2.47228	0.0134254	0.0340764
FBgn0033952	563.485	-4.09531	1.55039	-2.64148	0.00825449	0.0227732
FBgn0040674	171.902	-4.09382	1.43136	-2.86008	0.0042353	0.0130823
FBgn0085233	104.135	-4.09324	1.69188	-2.41935	0.0155485	0.0384048
FBgn0038210	512.04	-4.09075	1.50385	-2.72018	0.00652459	0.0187482
FBgn0004618	237.657	-4.08617	0.641976	-6.365	1.95294e-10	2.53016e-09
FBgn0053773	28.1152	-4.08475	0.736915	-5.54303	2.97273e-08	2.82778e-07
FBgn0031345	180.784	-4.08281	1.34258	-3.04101	0.00235785	0.00790189
FBgn0032360	1423.97	-4.08193	1.6521	-2.47075	0.0134831	0.034197
FBgn0042711	321.354	-4.08142	1.15004	-3.54894	0.000386786	0.00163253
FBgn0263585	41.1383	-4.0797	1.40799	-2.89755	0.00376095	0.0118164
FBgn0052228	41.1063	-4.07938	1.43085	-2.85101	0.00435803	0.013373
FBgn0038359	1391.71	-4.07683	1.39593	-2.92052	0.00349449	0.0111066
FBgn0085315	184.475	-4.0757	1.45228	-2.80641	0.00500967	0.0150324
FBgn0050103	438.15	-4.07532	1.35472	-3.00824	0.00262769	0.00870405
FBgn0260996	231.011	-4.07523	1.40796	-2.89443	0.00379845	0.0119119
FBgn0264828	28.1482	-4.07503	0.826692	-4.92933	8.25137e-07	6.13573e-06
FBgn0053908	37.3677	-4.07373	1.3631	-2.98859	0.0028027	0.00919302
FBgn0263250	59.1165	-4.0733	1.52581	-2.6696	0.00759409	0.0212793
FBgn0025115	95.4553	-4.07265	1.67598	-2.43001	0.0150983	0.0375207
FBgn0052437	865.113	-4.07069	1.55916	-2.61083	0.00903232	0.0245956
FBgn0032664	664.991	-4.06783	1.12892	-3.60328	0.000314224	0.00135874
FBgn0265654	7.93231	-4.06562	1.23966	-3.27963	0.00103942	0.00387854
FBgn0267793	109.731	-4.06474	0.831647	-4.88758	1.02085e-06	7.47513e-06
FBgn0035004	87.6654	-4.06372	1.64954	-2.46355	0.013757	0.0347995
FBgn0287214	7.83043	-4.0613	1.35887	-2.98872	0.00280145	0.00919115
FBgn0085345	19.0658	-4.05996	1.16368	-3.4889	0.000485021	0.00199508
FBgn0052835	1083.44	-4.05674	1.37081	-2.95938	0.00308258	0.00998338
FBgn0053236	7.85228	-4.05534	1.26725	-3.20011	0.00137373	0.00491948
FBgn0054029	425.321	-4.05497	1.52468	-2.65955	0.00782443	0.0217838
FBgn0037860	528.496	-4.0539	1.63256	-2.48316	0.0130223	0.0332544
FBgn0034472	1296.87	-4.05201	1.42075	-2.85202	0.00434428	0.013343
FBgn0031724	3138.23	-4.0508	1.42018	-2.85232	0.00434011	0.0133363
FBgn0267141	15.894	-4.05075	0.926366	-4.37273	1.22701e-05	7.27103e-05
FBgn0267713	79.6672	-4.0491	1.62301	-2.49481	0.0126023	0.0323978
FBgn0267417	167.538	-4.04656	1.42441	-2.84087	0.00449914	0.0137463
FBgn0263495	155.187	-4.04558	1.16775	-3.46443	0.000531352	0.00216772
FBgn0052440	358.376	-4.04543	1.33316	-3.03445	0.00240972	0.0080516
FBgn0259861	11.6203	-4.04412	1.11219	-3.63617	0.000276721	0.00121457
FBgn0020445	1942.13	-4.04267	0.428489	-9.43472	3.92024e-21	1.58486e-19
FBgn0036089	254.569	-4.04246	1.15815	-3.49046	0.000482183	0.00198462
FBgn0037419	31.4393	-4.03946	0.697557	-5.79087	7.00218e-09	7.32748e-08
FBgn0032492	745.651	-4.03913	1.50728	-2.67974	0.007368	0.0207672
FBgn0038281	615.098	-4.03889	1.74956	-2.30852	0.0209703	0.0492489
FBgn0263130	71.9677	-4.0378	1.59734	-2.52783	0.0114772	0.0299352
FBgn0265071	4.25541	-4.03738	1.5454	-2.61252	0.00898775	0.0245091
FBgn0037304	646.158	-4.03673	0.857201	-4.7092	2.48686e-06	1.70212e-05
FBgn0035426	329.026	-4.03414	1.38547	-2.91176	0.00359404	0.0113665
FBgn0051804	299.692	-4.03082	1.58208	-2.54779	0.0108406	0.02853
FBgn0038941	7.66955	-4.02715	1.36495	-2.95041	0.00317347	0.0102187
FBgn0037672	2258.72	-4.02661	0.362456	-11.1092	1.13148e-28	8.03531e-27
FBgn0037571	597.859	-4.02167	1.55865	-2.58023	0.00987345	0.0264303
FBgn0037398	748.18	-4.02052	1.54903	-2.5955	0.00944526	0.0255439
FBgn0001281	321.545	-4.01918	1.69045	-2.37758	0.0174266	0.0422811
FBgn0053136	561.652	-4.01773	1.17508	-3.41911	0.000628258	0.00251009
FBgn0260396	22.0804	-4.01764	1.18383	-3.39375	0.000689422	0.0027208
FBgn0032549	72.2937	-4.01478	1.21293	-3.30997	0.000933053	0.00353969
FBgn0038607	1078.26	-4.01451	1.55593	-2.58013	0.00987645	0.026433
FBgn0085245	113.119	-4.01253	1.18457	-3.38733	0.000705757	0.00277709
FBgn0001253	976.561	-4.01026	0.534119	-7.50817	5.99613e-14	1.2066e-12
FBgn0041234	27.3336	-4.008	0.704705	-5.68748	1.28927e-08	1.30306e-07
FBgn0266804	7.86784	-4.00761	1.38321	-2.89733	0.00376353	0.0118217
FBgn0038285	7.61792	-4.00637	1.26726	-3.16146	0.00156982	0.00552877
FBgn0038944	49.4728	-4.00505	0.643579	-6.22309	4.87463e-10	5.95877e-09
FBgn0265317	14.9832	-4.00439	1.04408	-3.83533	0.000125396	0.000599167
FBgn0011244	4566.31	-4.00245	1.35945	-2.94417	0.00323818	0.0104053
FBgn0051816	169.668	-4.00189	1.44509	-2.76931	0.00561759	0.0165204
FBgn0266163	7.52583	-4.00067	1.36436	-2.93227	0.00336499	0.0107561
FBgn0032312	230.238	-3.9989	1.32289	-3.02286	0.002504	0.00833341
FBgn0053844	25.2399	-3.99756	1.22998	-3.2501	0.00115365	0.00422838
FBgn0038943	12281.9	-3.99593	0.543508	-7.35211	1.95096e-13	3.73549e-12
FBgn0034973	111.077	-3.99469	0.978013	-4.08449	4.41728e-05	0.000233973
FBgn0039387	21.6629	-3.99161	1.21956	-3.273	0.00106412	0.00395659
FBgn0038978	1773.73	-3.99107	1.10803	-3.60195	0.000315844	0.00136442
FBgn0287615	7.46817	-3.99088	1.39315	-2.86463	0.00417493	0.0129145
FBgn0046332	1884.08	-3.98996	1.51757	-2.62918	0.00855915	0.0235123
FBgn0032754	42.1695	-3.98813	1.44217	-2.76537	0.00568587	0.0166993
FBgn0035139	315.197	-3.98621	1.61129	-2.47392	0.0133638	0.0339457
FBgn0266199	8.02475	-3.98255	1.3891	-2.867	0.00414384	0.0128361
FBgn0036250	21.5423	-3.9795	1.18227	-3.36598	0.000762728	0.00297152
FBgn0085197	2642.82	-3.97921	1.27296	-3.12594	0.00177237	0.00615172
FBgn0033819	484.31	-3.97858	1.25932	-3.1593	0.00158151	0.00556411
FBgn0054012	122.625	-3.9755	1.02381	-3.88306	0.000103152	0.000504924
FBgn0031644	434.046	-3.97511	1.2229	-3.25056	0.00115177	0.00422378
FBgn0051327	952.16	-3.97306	0.947576	-4.19287	2.75444e-05	0.000152454
FBgn0261806	110.977	-3.9712	1.3246	-2.99804	0.00271722	0.00896521
FBgn0029501	1797.97	-3.96907	1.58055	-2.51121	0.012032	0.0311522
FBgn0264875	28.1101	-3.9679	1.2909	-3.07375	0.00211389	0.00719787
FBgn0266932	21.3085	-3.96449	1.19932	-3.30562	0.000947651	0.00358292
FBgn0259958	21.2313	-3.96025	1.21337	-3.26384	0.00109913	0.0040708
FBgn0032291	803.58	-3.95652	1.33583	-2.96185	0.00305796	0.00991879
FBgn0037962	886.944	-3.9548	1.43978	-2.7468	0.00601795	0.0175136
FBgn0039812	277.491	-3.9534	1.38356	-2.85741	0.00427107	0.0131664
FBgn0051226	1692.11	-3.95288	1.49569	-2.64285	0.00822119	0.0227047
FBgn0266784	21.0388	-3.94882	1.24751	-3.16537	0.00154886	0.00546643
FBgn0035776	3273.03	-3.9462	1.4142	-2.79042	0.005264	0.015659
FBgn0034464	831.585	-3.94406	1.5389	-2.56291	0.0103798	0.0275128
FBgn0267269	7.2578	-3.94284	1.33476	-2.95398	0.00313704	0.010119
FBgn0051010	433.518	-3.94055	1.26203	-3.1224	0.00179384	0.00621501
FBgn0267321	7.28345	-3.94027	1.26715	-3.10955	0.00187372	0.00646673
FBgn0037626	323.18	-3.93895	1.62001	-2.43143	0.0150392	0.0374016
FBgn0267319	7.49037	-3.93515	1.44125	-2.73037	0.00632628	0.0182644
FBgn0033190	928.266	-3.93228	0.885253	-4.44199	8.9131e-06	5.45019e-05
FBgn0053490	555.895	-3.92935	1.20491	-3.26112	0.00110974	0.00409992
FBgn0052240	453.104	-3.92873	1.20744	-3.25376	0.0011389	0.00418344
FBgn0086681	237.386	-3.92285	1.05302	-3.72533	0.000195063	0.000889916
FBgn0032365	83.3178	-3.92157	0.543244	-7.2188	5.24496e-13	9.57793e-12
FBgn0038123	394.223	-3.91969	1.6673	-2.35092	0.0187271	0.0447969
FBgn0039491	863.731	-3.9152	1.13874	-3.43819	0.000585626	0.0023583
FBgn0034957	1309.11	-3.91269	1.44492	-2.70789	0.00677116	0.0193573
FBgn0263034	85.9585	-3.91214	1.68526	-2.3214	0.0202655	0.0479216
FBgn0053243	10.5933	-3.91134	1.17387	-3.33202	0.000862188	0.00330731
FBgn0038018	247.377	-3.91006	0.994533	-3.93155	8.43997e-05	0.000418939
FBgn0266863	7.14035	-3.90813	1.27308	-3.06983	0.00214178	0.0072814
FBgn0050161	212.333	-3.90762	0.588377	-6.64136	3.10812e-11	4.55428e-10
FBgn0050356	222.32	-3.90577	1.48799	-2.62486	0.00866837	0.0237734
FBgn0267134	17.1463	-3.90177	1.20468	-3.23886	0.00120009	0.00437113
FBgn0040648	78.7592	-3.8998	1.6768	-2.32574	0.0200323	0.0474705
FBgn0263493	1632.42	-3.89848	0.74235	-5.25154	1.50836e-07	1.28309e-06
FBgn0085198	78.581	-3.89602	1.65437	-2.35499	0.0185231	0.0444515
FBgn0031905	1201.67	-3.89476	1.5107	-2.57811	0.00993422	0.0265771
FBgn0031723	1577.52	-3.88922	1.56635	-2.48298	0.0130288	0.0332646
FBgn0085327	166.203	-3.88578	1.4678	-2.64735	0.00811256	0.0224555
FBgn0054046	3.8594	-3.88578	1.54073	-2.52204	0.0116676	0.0303965
FBgn0051093	417.568	-3.88452	1.68373	-2.3071	0.0210495	0.0494099
FBgn0051730	139.944	-3.88331	0.978187	-3.96991	7.19007e-05	0.000362257
FBgn0034477	489.708	-3.88279	1.58899	-2.44355	0.0145434	0.0364183
FBgn0033860	1889.96	-3.88161	1.2844	-3.02212	0.00251014	0.00835179
FBgn0085486	522.773	-3.87906	1.52933	-2.53644	0.0111987	0.0293229
FBgn0030493	265.558	-3.87564	0.666212	-5.81743	5.97592e-09	6.35066e-08
FBgn0032648	512.707	-3.87446	1.59878	-2.42338	0.0153767	0.0380856
FBgn0085570	13.6007	-3.8737	1.1879	-3.26097	0.00111032	0.00410091
FBgn0033369	784.348	-3.87272	1.60453	-2.41362	0.0157949	0.0389634
FBgn0034506	461.15	-3.87008	1.34118	-2.88558	0.00390698	0.0122009
FBgn0263664	6.95135	-3.87002	1.28235	-3.0179	0.00254533	0.00846257
FBgn0029727	83.5572	-3.8684	1.67578	-2.30841	0.0209761	0.0492489
FBgn0261924	3.82237	-3.8683	1.66972	-2.31674	0.0205179	0.0484154
FBgn0262687	297.939	-3.86725	1.06951	-3.61589	0.000299317	0.00130183
FBgn0052263	174.505	-3.86677	1.47557	-2.62053	0.00877928	0.0240382
FBgn0264472	90.464	-3.86667	1.38708	-2.78764	0.00530939	0.0157766
FBgn0031443	519.377	-3.86577	1.60995	-2.40117	0.0163429	0.0400964
FBgn0037516	72.2994	-3.86476	1.1141	-3.46897	0.000522462	0.00213405
FBgn0264262	19.7492	-3.86449	1.42768	-2.70683	0.0067929	0.0194034
FBgn0031332	369.485	-3.86309	1.40295	-2.75355	0.00589519	0.0171974
FBgn0032003	486.644	-3.86168	1.57371	-2.45387	0.014133	0.0355763
FBgn0267932	6.85024	-3.86151	1.43697	-2.68726	0.00720402	0.0203677
FBgn0015230	249.823	-3.85896	0.56518	-6.82784	8.62002e-12	1.36759e-10
FBgn0262479	244.915	-3.85819	1.47371	-2.61801	0.00884445	0.0241772
FBgn0262030	143.619	-3.85743	1.18343	-3.25953	0.00111595	0.00411718
FBgn0284082	371.451	-3.85704	1.00674	-3.83123	0.000127505	0.000607945
FBgn0052447	1259.63	-3.84884	0.335575	-11.4694	1.87968e-30	1.58673e-28
FBgn0002862	1971.49	-3.84522	1.37642	-2.79363	0.00521193	0.015542
FBgn0004173	2080.01	-3.84324	1.4044	-2.73657	0.00620842	0.0179783
FBgn0039792	1665.89	-3.84139	1.52892	-2.51249	0.0119881	0.0310584
FBgn0034461	385.415	-3.8387	1.24865	-3.07428	0.00211009	0.00718822
FBgn0265594	14.1162	-3.83845	1.49545	-2.56675	0.0102656	0.0272679
FBgn0046885	3.73149	-3.83478	1.4849	-2.58252	0.00980813	0.0262816
FBgn0051682	395.67	-3.83391	1.46791	-2.61182	0.00900625	0.0245446
FBgn0267153	157.715	-3.83363	0.57345	-6.68521	2.30598e-11	3.44282e-10
FBgn0038014	6.99867	-3.8303	1.36473	-2.80665	0.00500599	0.0150247
FBgn0031526	1112.34	-3.82747	0.995357	-3.84532	0.000120393	0.000578351
FBgn0265766	13.1801	-3.82505	1.18668	-3.22332	0.00126713	0.0045805
FBgn0267666	6.9718	-3.82503	1.35894	-2.81471	0.00488217	0.0146991
FBgn0267885	6.67109	-3.82149	1.41181	-2.7068	0.00679344	0.0194034
FBgn0050324	898.661	-3.81977	1.50474	-2.53849	0.0111332	0.0291913
FBgn0039196	10.2634	-3.81942	1.10764	-3.44825	0.000564234	0.00228658
FBgn0267438	9.98175	-3.81909	1.18568	-3.22102	0.00127734	0.00461244
FBgn0033020	1650.26	-3.81856	1.00933	-3.78325	0.000154794	0.000720903
FBgn0267640	6.72546	-3.81828	1.27563	-2.99326	0.00276017	0.00907794
FBgn0033701	31.5889	-3.81699	1.3855	-2.75497	0.00586983	0.0171346
FBgn0032483	422.018	-3.81516	1.24411	-3.06658	0.00216524	0.00734629
FBgn0266823	6.60802	-3.81498	1.52724	-2.49796	0.012491	0.0321547
FBgn0042133	719.683	-3.81253	1.60694	-2.37254	0.0176662	0.0427852
FBgn0250834	355.08	-3.80732	1.57179	-2.42227	0.0154237	0.0381537
FBgn0035014	328.991	-3.80727	1.55496	-2.44846	0.0143467	0.0360239
FBgn0031585	1784.86	-3.80652	1.21513	-3.1326	0.00173267	0.00603111
FBgn0053458	14.0245	-3.80432	0.967181	-3.93341	8.37495e-05	0.000416207
FBgn0028935	169.519	-3.80083	1.47615	-2.57483	0.010029	0.026772
FBgn0267214	16.0568	-3.80072	1.2099	-3.14136	0.00168166	0.00587487
FBgn0004511	20.0403	-3.79974	0.804026	-4.72589	2.2911e-06	1.5786e-05
FBgn0259151	354.587	-3.79592	1.06012	-3.58065	0.000342735	0.00146852
FBgn0038960	226.872	-3.79045	0.894635	-4.23687	2.26661e-05	0.000127557
FBgn0037939	4114.84	-3.78542	1.36511	-2.77297	0.00555477	0.0163716
FBgn0040519	1476.89	-3.78538	1.50483	-2.51549	0.0118867	0.0308415
FBgn0263765	29.7938	-3.78535	0.715787	-5.28837	1.23408e-07	1.06383e-06
FBgn0039797	2063.13	-3.78517	1.58055	-2.39484	0.0166276	0.0406473
FBgn0039002	207.649	-3.78305	1.44101	-2.62527	0.0086581	0.0237549
FBgn0028850	563.852	-3.78228	1.55429	-2.43344	0.0149561	0.0372432
FBgn0036895	991.566	-3.78174	1.1217	-3.37145	0.000747746	0.00292176
FBgn0051050	128.839	-3.77693	1.18314	-3.19229	0.00141151	0.00504
FBgn0033861	164.715	-3.77656	1.37148	-2.75364	0.00589365	0.0171967
FBgn0265708	36.6322	-3.77214	1.46091	-2.58205	0.00982153	0.0263123
FBgn0037464	1153.47	-3.7718	1.30427	-2.89189	0.00382928	0.011985
FBgn0051231	1560.77	-3.77166	1.38185	-2.72942	0.00634458	0.0183055
FBgn0069354	2594.61	-3.77157	1.40842	-2.67788	0.007409	0.020874
FBgn0028896	544.344	-3.76694	1.28848	-2.92356	0.00346053	0.0110169
FBgn0053322	769.363	-3.76573	1.39768	-2.69427	0.00705422	0.0200046
FBgn0028870	2758.03	-3.7641	1.33802	-2.81319	0.00490534	0.0147589
FBgn0085464	97.65	-3.76336	1.12621	-3.34163	0.000832879	0.00320864
FBgn0038000	1241.81	-3.7633	1.34229	-2.80364	0.005053	0.0151353
FBgn0263339	73.9794	-3.76197	1.09991	-3.42025	0.000625638	0.00250143
FBgn0264268	20.3087	-3.75727	0.879354	-4.27277	1.9306e-05	0.000110501
FBgn0267097	19.5188	-3.75536	0.776813	-4.83432	1.33602e-06	9.57395e-06
FBgn0053892	30.3414	-3.75496	1.38949	-2.70241	0.00688395	0.0195921
FBgn0050039	1270.88	-3.75466	1.1814	-3.17816	0.00148215	0.00526839
FBgn0047351	1736.67	-3.754	1.34711	-2.7867	0.00532474	0.0158152
FBgn0265578	42.0766	-3.75291	1.50881	-2.48733	0.0128707	0.0329551
FBgn0050376	3808.91	-3.75257	1.46933	-2.55393	0.0106513	0.0280869
FBgn0266971	24.3912	-3.75117	1.31956	-2.84275	0.00447261	0.0136746
FBgn0266248	33.1508	-3.74934	1.44481	-2.59504	0.00945806	0.0255695
FBgn0039104	3307.74	-3.74741	1.41858	-2.64167	0.00824983	0.0227651
FBgn0038508	118.677	-3.74043	1.35607	-2.75828	0.0058106	0.0170135
FBgn0034157	56.2731	-3.73935	0.627044	-5.96346	2.46958e-09	2.77378e-08
FBgn0001229	1767.23	-3.73754	0.475385	-7.86212	3.77685e-15	8.46292e-14
FBgn0033933	326.278	-3.73731	1.47201	-2.53891	0.0111198	0.0291617
FBgn0033818	703.12	-3.73725	1.61152	-2.31908	0.0203905	0.0481748
FBgn0032519	489.9	-3.73552	1.5845	-2.35754	0.0183966	0.044219
FBgn0266737	19.8293	-3.7354	1.36121	-2.74417	0.00606634	0.0176239
FBgn0004175	1416.43	-3.73432	1.35512	-2.75572	0.0058563	0.0171137
FBgn0033705	1669.06	-3.73376	1.37929	-2.70702	0.00678894	0.0194034
FBgn0261349	1024.77	-3.72965	1.14785	-3.24924	0.00115714	0.00423653
FBgn0262112	802.608	-3.72566	0.430156	-8.66119	4.66879e-18	1.36822e-16
FBgn0033954	4339.33	-3.72506	1.46506	-2.54259	0.0110035	0.0288906
FBgn0085303	123.033	-3.7229	1.50202	-2.4786	0.01319	0.0336186
FBgn0039739	6.20673	-3.72148	1.5553	-2.39277	0.0167216	0.0408143
FBgn0046698	82.7843	-3.72109	1.28193	-2.90273	0.00369931	0.01165
FBgn0034128	268.065	-3.71594	0.533046	-6.97115	3.14369e-12	5.22211e-11
FBgn0013810	510.752	-3.71564	1.03365	-3.59468	0.000324796	0.00139949
FBgn0051644	297.973	-3.71475	1.19819	-3.1003	0.00193324	0.00664475
FBgn0035952	1005.57	-3.71454	1.08414	-3.42625	0.000611981	0.00245414
FBgn0038208	4287.45	-3.71204	1.04956	-3.53676	0.000405064	0.00170325
FBgn0035003	359.774	-3.71169	1.59379	-2.32885	0.019867	0.0471289
FBgn0064912	1590.58	-3.71067	1.2722	-2.91674	0.00353715	0.0112235
FBgn0264949	6.36434	-3.71051	1.2774	-2.90474	0.00367559	0.0115834
FBgn0034658	696.582	-3.70881	1.18965	-3.11758	0.00182345	0.00631089
FBgn0033364	928.62	-3.70872	1.52318	-2.43485	0.014898	0.0371329
FBgn0038071	1677.36	-3.70745	0.400255	-9.26271	1.993e-20	7.26902e-19
FBgn0025838	468.994	-3.70706	1.32627	-2.79511	0.00518818	0.0154849
FBgn0036310	254.731	-3.70419	1.50557	-2.46031	0.0138816	0.035042
FBgn0031444	421.725	-3.70336	1.58158	-2.34156	0.0192035	0.0457732
FBgn0039395	261.705	-3.70309	1.51768	-2.43996	0.0146888	0.0366863
FBgn0028844	319.896	-3.69992	1.51083	-2.44893	0.014328	0.0359862
FBgn0267183	6.61943	-3.69963	1.27736	-2.8963	0.00377588	0.0118522
FBgn0030722	182.252	-3.6978	1.35716	-2.72465	0.00643689	0.0185399
FBgn0038690	583.548	-3.69494	1.06933	-3.45537	0.000549545	0.00223244
FBgn0032262	120.478	-3.69024	0.542663	-6.80026	1.04434e-11	1.6337e-10
FBgn0031333	662.82	-3.68998	1.53072	-2.41062	0.0159254	0.0392263
FBgn0264436	6.12807	-3.68808	1.39517	-2.64347	0.00820607	0.0226723
FBgn0038225	1653.97	-3.68798	1.36729	-2.69729	0.00699061	0.0198494
FBgn0266861	23.4009	-3.68666	1.31344	-2.80687	0.00500261	0.0150237
FBgn0267493	3.38854	-3.6864	1.49682	-2.46282	0.0137848	0.0348568
FBgn0085210	190.953	-3.68639	1.31985	-2.79304	0.00522146	0.0155566
FBgn0051546	680.712	-3.68551	0.958005	-3.84707	0.000119541	0.000575081
FBgn0037023	612.159	-3.68217	1.55727	-2.3645	0.0180543	0.043521
FBgn0036159	1238.25	-3.6759	1.42222	-2.58461	0.00974885	0.0261437
FBgn0033141	507.049	-3.67466	1.47362	-2.49363	0.0126444	0.0324872
FBgn0262361	167.354	-3.6731	1.50141	-2.44644	0.0144274	0.0361615
FBgn0039887	352.723	-3.6731	1.00375	-3.65936	0.000252843	0.00112187
FBgn0042710	1128.61	-3.67186	1.33034	-2.7601	0.00577835	0.0169338
FBgn0265833	23.0296	-3.66444	1.35685	-2.70069	0.00691953	0.0196725
FBgn0262352	252.222	-3.66346	1.25787	-2.91244	0.00358614	0.0113521
FBgn0053704	356.524	-3.66146	1.1377	-3.21831	0.0012895	0.00465134
FBgn0001226	26030.5	-3.65785	0.814976	-4.48829	7.1796e-06	4.4696e-05
FBgn0033706	411.181	-3.65774	1.30144	-2.81054	0.00494582	0.014874
FBgn0053287	323.793	-3.65089	1.5763	-2.31611	0.0205524	0.0484686
FBgn0037388	632.138	-3.64998	1.52227	-2.39772	0.0164973	0.0404137
FBgn0265755	6.02338	-3.64902	1.28333	-2.8434	0.00446347	0.0136529
FBgn0051960	286.776	-3.64884	0.915324	-3.98639	6.70867e-05	0.000341204
FBgn0038921	1686.5	-3.64577	1.57072	-2.32109	0.020282	0.0479438
FBgn0265646	12.1518	-3.64521	1.01274	-3.59937	0.000318991	0.00137757
FBgn0262355	30.9488	-3.64439	1.48757	-2.44989	0.01429	0.0358975
FBgn0035196	2253.75	-3.64359	1.17397	-3.10366	0.00191143	0.00658604
FBgn0002732	837.842	-3.6432	0.567794	-6.4164	1.39532e-10	1.85794e-09
FBgn0051639	968.087	-3.6428	1.27608	-2.85468	0.00430809	0.0132592
FBgn0266762	5.97688	-3.64263	1.35292	-2.69243	0.00709344	0.0201031
FBgn0259917	131.322	-3.64143	1.38064	-2.6375	0.00835186	0.023004
FBgn0039235	194.568	-3.63489	1.03627	-3.50768	0.000452025	0.00187504
FBgn0283479	4441.29	-3.63285	0.480692	-7.55755	4.10747e-14	8.48162e-13
FBgn0037668	72.6659	-3.63131	1.26892	-2.86174	0.00421326	0.013027
FBgn0250842	24.5881	-3.6301	0.819329	-4.43058	9.39802e-06	5.71805e-05
FBgn0033953	4301.95	-3.62988	1.32954	-2.73018	0.00633004	0.0182713
FBgn0037432	666.028	-3.6269	1.16705	-3.10774	0.00188522	0.00650307
FBgn0267675	5.8925	-3.62508	1.40199	-2.58568	0.00971875	0.0260786
FBgn0033490	84.8956	-3.62375	0.974899	-3.71705	0.000201559	0.000917624
FBgn0265690	27.8065	-3.6207	1.41539	-2.5581	0.0105246	0.0278238
FBgn0031462	1081.22	-3.6202	1.05867	-3.41958	0.000627188	0.00250688
FBgn0031826	659.296	-3.61884	1.11469	-3.24651	0.00116831	0.00427159
FBgn0053792	9.15768	-3.61641	1.18064	-3.06308	0.00219069	0.00741963
FBgn0260644	123.773	-3.61587	1.36431	-2.65033	0.00804131	0.0222905
FBgn0032055	14.2283	-3.61439	1.21634	-2.97154	0.00296313	0.00964852
FBgn0031954	272.801	-3.61352	1.54512	-2.33867	0.0193527	0.046088
FBgn0039576	398.244	-3.61277	1.56195	-2.31298	0.0207235	0.0487899
FBgn0265713	22.2223	-3.60883	1.3573	-2.65884	0.00784109	0.0218256
FBgn0250824	150.647	-3.60665	0.937326	-3.84781	0.000119177	0.000573997
FBgn0053340	7277.99	-3.60627	1.36498	-2.64199	0.00824212	0.0227531
FBgn0287621	11.448	-3.60496	1.16738	-3.08808	0.00201457	0.00689431
FBgn0038280	595.838	-3.60443	1.44265	-2.49847	0.012473	0.0321206
FBgn0259795	16296.7	-3.60204	1.52294	-2.36518	0.0180211	0.0434723
FBgn0034636	903.095	-3.59825	0.454493	-7.91706	2.43186e-15	5.59871e-14
FBgn0034595	380.408	-3.59583	1.08563	-3.3122	0.000925638	0.00351355
FBgn0034835	918.632	-3.59427	1.30694	-2.75014	0.00595706	0.0173655
FBgn0036328	491.761	-3.59194	1.271	-2.82607	0.00471231	0.0142776
FBgn0035290	638.962	-3.59114	0.762338	-4.7107	2.46868e-06	1.69141e-05
FBgn0031751	2170.29	-3.58383	1.29452	-2.76847	0.00563205	0.0165485
FBgn0034745	1092.1	-3.58302	1.28264	-2.79347	0.00521465	0.0155432
FBgn0053829	27.9632	-3.58144	1.04842	-3.41605	0.000635375	0.00253357
FBgn0259193	5.7429	-3.57934	1.34315	-2.66489	0.00770126	0.0215167
FBgn0039518	1160.11	-3.57555	1.39663	-2.56012	0.0104636	0.0276898
FBgn0034906	16.5172	-3.5755	1.25609	-2.84653	0.00441987	0.0135411
FBgn0040679	146.298	-3.57192	1.4867	-2.40258	0.0162799	0.0399761
FBgn0031859	3391.82	-3.57183	1.41963	-2.51603	0.0118686	0.0308065
FBgn0036925	783.631	-3.57125	1.53178	-2.33143	0.0197305	0.0468797
FBgn0053017	331.852	-3.57063	1.05378	-3.38841	0.000702986	0.00276863
FBgn0001216	573.933	-3.56958	0.699011	-5.10662	3.27977e-07	2.61253e-06
FBgn0003011	11.1558	-3.56923	1.20549	-2.96082	0.00306825	0.00994496
FBgn0035581	752.646	-3.56732	1.13538	-3.14196	0.00167823	0.00586442
FBgn0003162	12601.5	-3.56676	0.475001	-7.50895	5.96048e-14	1.20122e-12
FBgn0036345	349.732	-3.56448	1.52091	-2.34366	0.0190958	0.045557
FBgn0265147	5.89782	-3.56293	1.32211	-2.69487	0.00704157	0.0199814
FBgn0038200	4378.19	-3.56212	1.32754	-2.68325	0.00729113	0.0205721
FBgn0037283	1102.47	-3.56121	1.31067	-2.71709	0.00658591	0.0188961
FBgn0037101	405.091	-3.55863	1.121	-3.1745	0.00150093	0.00532525
FBgn0036687	3245.23	-3.55573	1.52971	-2.32445	0.0201015	0.0476119
FBgn0034844	1868.29	-3.55557	1.50452	-2.36326	0.0181147	0.0436431
FBgn0034826	642.902	-3.55341	1.4056	-2.52804	0.01147	0.0299224
FBgn0261287	207.466	-3.55209	0.988317	-3.59408	0.000325543	0.00140181
FBgn0034505	748.186	-3.55057	1.3392	-2.65126	0.00801916	0.0222383
FBgn0051618	29.1519	-3.54951	1.44861	-2.45029	0.014274	0.035864
FBgn0265443	47.6652	-3.53614	0.608965	-5.8068	6.36791e-09	6.72463e-08
FBgn0261529	544.402	-3.53559	1.19192	-2.9663	0.00301407	0.00979775
FBgn0037115	597.297	-3.53344	0.921046	-3.83633	0.000124885	0.00059694
FBgn0037412	5.77817	-3.53016	1.39543	-2.52979	0.011413	0.0297859
FBgn0028902	829.041	-3.52771	1.34905	-2.61496	0.0089238	0.0243644
FBgn0265548	55.806	-3.5233	1.06266	-3.31554	0.000914676	0.00347981
FBgn0037147	1063.36	-3.52315	1.23676	-2.8487	0.00438988	0.0134584
FBgn0033322	426.406	-3.52198	1.10813	-3.1783	0.0014814	0.00526712
FBgn0034301	505.556	-3.52059	0.474677	-7.41682	1.19964e-13	2.33695e-12
FBgn0038209	283.8	-3.51591	0.897042	-3.91945	8.87516e-05	0.00043908
FBgn0034132	10768.7	-3.5133	1.4414	-2.43742	0.0147925	0.0369111
FBgn0266898	22.2367	-3.51251	0.8022	-4.37859	1.19448e-05	7.09393e-05
FBgn0039504	123.203	-3.5123	0.995457	-3.52832	0.000418202	0.00174863
FBgn0265586	25.8487	-3.50784	1.44269	-2.43145	0.0150384	0.0374016
FBgn0265342	339.679	-3.5078	1.08317	-3.23847	0.00120174	0.00437476
FBgn0051740	3564.96	-3.50736	1.50206	-2.33503	0.0195418	0.0464807
FBgn0266087	15.7553	-3.50732	1.32992	-2.63725	0.00835817	0.023012
FBgn0262995	10.7337	-3.50557	1.17572	-2.98164	0.00286711	0.00937223
FBgn0037460	764.159	-3.50534	1.36629	-2.56559	0.0103	0.0273393
FBgn0086265	17.4337	-3.5052	1.10328	-3.17707	0.0014877	0.0052827
FBgn0030290	330.956	-3.5043	1.44276	-2.42889	0.015145	0.0376229
FBgn0267326	581.541	-3.50369	0.830036	-4.22114	2.43075e-05	0.00013611
FBgn0039669	594.367	-3.50053	1.24719	-2.80674	0.00500455	0.0150237
FBgn0266821	5.4518	-3.49949	1.33761	-2.61623	0.00889071	0.024279
FBgn0035915	16968.3	-3.49884	1.4811	-2.36232	0.018161	0.0437466
FBgn0015831	1011.91	-3.49772	1.51129	-2.3144	0.0206456	0.0486407
FBgn0052436	4539.61	-3.49761	1.36885	-2.55514	0.0106144	0.0280116
FBgn0031451	758.736	-3.49449	1.51185	-2.3114	0.020811	0.0489616
FBgn0037483	479.321	-3.49407	1.48395	-2.35457	0.018544	0.044462
FBgn0267423	10.602	-3.48962	1.20621	-2.89304	0.00381529	0.0119535
FBgn0033498	408.237	-3.48562	1.33154	-2.61772	0.00885187	0.0241923
FBgn0039510	131.552	-3.48526	0.325214	-10.7168	8.48763e-27	5.20187e-25
FBgn0053125	269.499	-3.47968	1.11857	-3.11083	0.00186565	0.00644218
FBgn0267817	13.8508	-3.47959	0.801235	-4.34278	1.40689e-05	8.23877e-05
FBgn0032636	2236.65	-3.47764	1.35745	-2.5619	0.0104102	0.0275648
FBgn0265255	151.913	-3.47485	1.29765	-2.67781	0.00741059	0.0208741
FBgn0266165	5.36743	-3.47279	1.32832	-2.61443	0.00893774	0.0243925
FBgn0001227	353.668	-3.47254	0.422368	-8.2216	2.00811e-16	5.1047e-15
FBgn0034996	70.8577	-3.46865	0.480806	-7.21425	5.42331e-13	9.87675e-12
FBgn0046297	2786.78	-3.46822	1.398	-2.48085	0.0131068	0.0334257
FBgn0038655	1109.43	-3.4672	1.42257	-2.43728	0.0147984	0.0369189
FBgn0034816	2972.82	-3.46548	1.19162	-2.90822	0.00363493	0.0114795
FBgn0038705	35.8953	-3.46447	1.05806	-3.27437	0.00105897	0.00394053
FBgn0002577	91.6625	-3.46366	0.514792	-6.72828	1.71686e-11	2.62158e-10
FBgn0053841	23.435	-3.46274	1.03409	-3.34858	0.000812281	0.0031401
FBgn0031301	230.83	-3.45931	1.34321	-2.5754	0.0100124	0.0267435
FBgn0027527	119.196	-3.45394	0.397116	-8.69756	3.39089e-18	1.01139e-16
FBgn0038598	2714.35	-3.45312	1.03719	-3.32931	0.000870614	0.00333202
FBgn0267419	417.639	-3.45054	1.25196	-2.75611	0.0058494	0.0171122
FBgn0265723	16.1664	-3.44952	0.910445	-3.78883	0.000151357	0.000708089
FBgn0046697	830.354	-3.44706	0.514029	-6.70596	2.00089e-11	3.01413e-10
FBgn0031139	253.806	-3.44639	1.45579	-2.36738	0.0179147	0.0432777
FBgn0051076	1055.83	-3.44543	0.426673	-8.07511	6.74153e-16	1.6333e-14
FBgn0069913	1107.98	-3.44256	1.26576	-2.71975	0.0065332	0.0187649
FBgn0031720	327.709	-3.43499	1.23821	-2.77416	0.00553449	0.016319
FBgn0287645	695.019	-3.43496	1.42353	-2.41299	0.0158223	0.0390094
FBgn0050184	349.855	-3.43484	1.49008	-2.30513	0.0211594	0.0496245
FBgn0036931	698.955	-3.4331	1.23905	-2.77075	0.00559281	0.0164656
FBgn0262989	243.39	-3.42536	1.25381	-2.73196	0.00629584	0.0181922
FBgn0051029	5644.69	-3.4252	0.904411	-3.78721	0.000152347	0.000712473
FBgn0250844	1655.89	-3.42508	1.39059	-2.46304	0.0137766	0.0348427
FBgn0050099	183.38	-3.41823	1.24511	-2.74531	0.00604529	0.0175742
FBgn0037463	724.639	-3.41735	1.42322	-2.40115	0.0163439	0.0400964
FBgn0031546	1095.4	-3.41719	1.42791	-2.39314	0.0167046	0.0407877
FBgn0031302	17.9484	-3.41617	0.992829	-3.44085	0.000579896	0.00234086
FBgn0037086	1420.76	-3.41368	1.33627	-2.55463	0.0106299	0.0280421
FBgn0033834	1418.86	-3.41008	1.42342	-2.3957	0.0165889	0.0405788
FBgn0034840	4998.77	-3.40976	1.43502	-2.37611	0.0174961	0.0424039
FBgn0033499	109.604	-3.40956	1.12982	-3.01779	0.00254626	0.00846359
FBgn0053847	23.1989	-3.40931	0.854759	-3.98862	6.64592e-05	0.000338397
FBgn0053832	30.337	-3.40901	1.00403	-3.39533	0.000685456	0.00270912
FBgn0032175	209.274	-3.40871	1.30271	-2.61663	0.00888032	0.0242563
FBgn0032973	615.141	-3.40675	1.3056	-2.60934	0.00907181	0.0246831
FBgn0267140	24.2008	-3.40365	1.42759	-2.3842	0.0171165	0.0416191
FBgn0030104	184.591	-3.4008	1.27491	-2.66748	0.00764235	0.0213699
FBgn0036490	546.095	-3.40068	1.01889	-3.33764	0.000844925	0.00324945
FBgn0040705	29.8219	-3.40024	0.962171	-3.53393	0.000409437	0.00171733
FBgn0032740	593.941	-3.39816	1.43002	-2.37631	0.017487	0.0423971
FBgn0264889	65.4958	-3.39394	1.13889	-2.98004	0.00288207	0.00941197
FBgn0039799	499.619	-3.39267	0.93192	-3.64052	0.000272087	0.00119501
FBgn0265812	73.8889	-3.38721	1.31807	-2.56983	0.0101748	0.0270857
FBgn0038575	610.012	-3.38601	1.32481	-2.55584	0.0105933	0.0279669
FBgn0262990	5.03433	-3.38524	1.41624	-2.39031	0.0168343	0.041037
FBgn0033610	1348.08	-3.38297	1.09964	-3.07643	0.00209492	0.00714019
FBgn0266708	255.943	-3.37448	1.35355	-2.49306	0.0126646	0.0325143
FBgn0267136	29.284	-3.37435	1.00194	-3.36784	0.000757607	0.00295685
FBgn0033828	142.399	-3.37414	1.41343	-2.3872	0.0169772	0.0413252
FBgn0250845	2573.12	-3.37394	1.38761	-2.43147	0.0150376	0.0374016
FBgn0031208	541.833	-3.37106	0.983656	-3.42708	0.000610117	0.0024474
FBgn0034127	1384.17	-3.36385	1.33463	-2.52043	0.0117211	0.0305063
FBgn0061197	5195.35	-3.36149	1.36591	-2.46099	0.0138554	0.0349892
FBgn0032771	1041.53	-3.35868	1.381	-2.43206	0.0150131	0.0373643
FBgn0029809	128.967	-3.35807	1.3161	-2.55153	0.010725	0.0282755
FBgn0031292	656.737	-3.35665	1.24444	-2.69732	0.00699002	0.0198494
FBgn0029993	522.918	-3.35529	1.17466	-2.85641	0.00428467	0.0131992
FBgn0262903	9.7348	-3.35415	1.198	-2.7998	0.00511342	0.0152924
FBgn0041102	2638.07	-3.35306	1.38393	-2.42286	0.015399	0.0381198
FBgn0286507	2511.28	-3.35238	1.21036	-2.76975	0.00561002	0.0165052
FBgn0053820	28.604	-3.3462	1.1351	-2.94794	0.00319902	0.0102942
FBgn0035316	900.511	-3.34532	1.42043	-2.35515	0.0185152	0.0444515
FBgn0051482	334.775	-3.3442	1.27965	-2.61337	0.00896551	0.0244584
FBgn0263233	4.90879	-3.3386	1.38815	-2.40508	0.0161691	0.0397331
FBgn0037514	426.182	-3.33747	1.36006	-2.45392	0.0141308	0.0355763
FBgn0030280	873.41	-3.33694	1.25959	-2.64922	0.00806777	0.02235
FBgn0026563	965.004	-3.33622	1.06522	-3.13195	0.00173649	0.00604125
FBgn0039070	1386.93	-3.33308	1.27507	-2.61404	0.0089479	0.0244153
FBgn0031501	1056.22	-3.33301	1.21985	-2.73232	0.00628909	0.0181766
FBgn0050432	352.264	-3.33218	1.3642	-2.44259	0.0145822	0.0365018
FBgn0034687	257.532	-3.33177	0.525563	-6.33943	2.3062e-10	2.96492e-09
FBgn0039511	2122.24	-3.33075	1.26102	-2.64133	0.00825822	0.0227742
FBgn0265653	10.1881	-3.32912	1.37354	-2.42375	0.0153612	0.0380619
FBgn0265836	105.474	-3.32899	0.589755	-5.64469	1.65476e-08	1.6452e-07
FBgn0032337	62.1388	-3.32774	0.55936	-5.94919	2.69474e-09	3.00406e-08
FBgn0265078	16.3222	-3.32656	1.32	-2.52012	0.0117316	0.0305157
FBgn0051988	3743.1	-3.32383	1.38944	-2.3922	0.0167477	0.0408631
FBgn0262480	4.86129	-3.32205	1.35888	-2.4447	0.0144972	0.0363229
FBgn0033280	265.491	-3.31381	1.20252	-2.75572	0.00585636	0.0171137
FBgn0039752	709.701	-3.31351	1.40129	-2.36462	0.0180486	0.0435149
FBgn0028407	161.443	-3.31264	0.720129	-4.60007	4.22348e-06	2.76255e-05
FBgn0036153	87.5037	-3.30615	0.720585	-4.58816	4.47178e-06	2.91502e-05
FBgn0051286	162.807	-3.30438	1.29195	-2.55766	0.0105379	0.027848
FBgn0017556	741.399	-3.30393	1.16306	-2.84072	0.00450117	0.0137494
FBgn0262513	46.8797	-3.30316	0.913496	-3.61595	0.000299244	0.00130183
FBgn0042189	1684.09	-3.30262	1.42237	-2.32192	0.0202373	0.0478738
FBgn0053886	41.2253	-3.30234	1.15432	-2.86086	0.00422499	0.0130573
FBgn0040333	625.716	-3.30077	1.42158	-2.32191	0.0202379	0.0478738
FBgn0037579	430.074	-3.29096	1.19711	-2.7491	0.00597601	0.0174142
FBgn0037616	2306.66	-3.29001	1.1678	-2.81727	0.00484336	0.014612
FBgn0053489	423.437	-3.28926	0.920981	-3.57147	0.000354983	0.00151522
FBgn0030578	151.679	-3.28777	1.41086	-2.33033	0.0197885	0.0469836
FBgn0262845	95.6302	-3.28553	1.42321	-2.30854	0.0209689	0.0492489
FBgn0063127	1758.16	-3.2846	0.772471	-4.25207	2.11808e-05	0.000120309
FBgn0023090	301.087	-3.28455	0.979852	-3.35208	0.000802056	0.00310504
FBgn0261586	35.5576	-3.28342	0.995655	-3.29775	0.000974643	0.00366741
FBgn0036352	4.7511	-3.28269	1.33315	-2.46235	0.013803	0.0348831
FBgn0003250	86.7987	-3.28214	0.721094	-4.5516	5.32383e-06	3.39945e-05
FBgn0034121	2184.95	-3.27992	1.4036	-2.33679	0.0194502	0.0462954
FBgn0250821	493.752	-3.27977	0.976518	-3.35863	0.00078329	0.00304237
FBgn0265155	4.72666	-3.27744	1.34872	-2.43003	0.0150977	0.0375207
FBgn0039459	1248.39	-3.27708	0.27954	-11.7231	9.70375e-32	9.0447e-30
FBgn0052445	1673.53	-3.27099	1.40254	-2.3322	0.0196904	0.0468009
FBgn0028379	1547.9	-3.27062	1.36876	-2.38948	0.0168721	0.0411068
FBgn0266256	19.9571	-3.26817	0.994382	-3.28663	0.00101393	0.00379503
FBgn0053814	29.1829	-3.26805	1.16398	-2.80765	0.0049904	0.0149947
FBgn0033888	1381.15	-3.26213	1.26989	-2.56883	0.0102044	0.0271393
FBgn0053904	27.2615	-3.25989	0.980886	-3.32341	0.000889232	0.00339649
FBgn0036236	140.686	-3.25279	0.770261	-4.22297	2.41105e-05	0.000135138
FBgn0265720	17.7756	-3.24896	1.06125	-3.06145	0.00220271	0.00744892
FBgn0000045	88.631	-3.2463	0.522597	-6.21187	5.23589e-10	6.36559e-09
FBgn0267264	4.63816	-3.2451	1.33967	-2.42231	0.0154221	0.0381537
FBgn0030408	23.7397	-3.24496	0.906622	-3.57917	0.000344681	0.00147477
FBgn0263336	82.8625	-3.24475	0.509968	-6.36266	1.98296e-10	2.56656e-09
FBgn0038694	1270.42	-3.24301	1.37464	-2.35916	0.0183162	0.0440732
FBgn0264819	48.2005	-3.2412	1.2106	-2.67735	0.00742076	0.0208852
FBgn0038565	887.083	-3.24	1.1329	-2.85992	0.00423753	0.013084
FBgn0002865	5382.39	-3.23969	1.3917	-2.32787	0.0199189	0.047227
FBgn0036785	506.192	-3.23891	1.24327	-2.60515	0.00918331	0.0249359
FBgn0265526	40.2188	-3.23816	1.00028	-3.23725	0.00120687	0.00439106
FBgn0287215	33.2543	-3.23717	1.12656	-2.87349	0.00405965	0.0126102
FBgn0028858	396.032	-3.23324	1.29902	-2.48899	0.0128106	0.0328389
FBgn0034478	400.766	-3.22829	1.18361	-2.72749	0.00638182	0.0183971
FBgn0000422	7799.24	-3.22623	0.357969	-9.0126	2.01231e-19	6.63617e-18
FBgn0053245	8.90068	-3.22098	1.28355	-2.50942	0.0120929	0.0312739
FBgn0053876	44.6373	-3.21826	0.820721	-3.92126	8.80884e-05	0.000436281
FBgn0053896	26.5596	-3.2178	0.972818	-3.30771	0.000940615	0.00355732
FBgn0032464	1942.12	-3.20791	1.386	-2.3145	0.0206404	0.0486407
FBgn0065099	17.9335	-3.20789	0.930797	-3.44639	0.000568139	0.00229963
FBgn0003889	9612.34	-3.20763	1.17226	-2.73629	0.00621365	0.0179896
FBgn0001099	37.7349	-3.20472	0.812847	-3.94258	8.0609e-05	0.000402057
FBgn0036596	26.8373	-3.20161	0.828877	-3.86258	0.000112194	0.000544618
FBgn0263743	23.0727	-3.2014	1.0468	-3.05828	0.00222615	0.0075187
FBgn0262581	684.945	-3.20091	1.2818	-2.4972	0.0125178	0.0322113
FBgn0017456	522.78	-3.19966	0.834512	-3.83417	0.00012599	0.000601363
FBgn0083978	511.559	-3.19863	0.373543	-8.56295	1.10014e-17	3.13505e-16
FBgn0250846	462.095	-3.19672	1.20058	-2.66265	0.00775273	0.0216287
FBgn0033963	747.728	-3.18709	1.32749	-2.40084	0.0163573	0.040122
FBgn0036830	284.083	-3.18543	1.0858	-2.9337	0.00334944	0.010714
FBgn0262036	395.132	-3.18527	1.10144	-2.8919	0.00382914	0.011985
FBgn0267165	43.52	-3.18337	0.946939	-3.36174	0.000774518	0.00301496
FBgn0039850	140.14	-3.17669	0.44091	-7.20485	5.8109e-13	1.04972e-11
FBgn0052650	498.317	-3.17629	0.927802	-3.42346	0.000618298	0.00247504
FBgn0034999	5196.38	-3.17389	0.288069	-11.0178	3.136e-28	2.12583e-26
FBgn0030780	1210.33	-3.17058	1.36157	-2.32862	0.0198791	0.0471491
FBgn0042126	230.78	-3.16753	0.931138	-3.40178	0.000669489	0.00265148
FBgn0265661	28.5558	-3.16449	0.847185	-3.73529	0.000187497	0.000858319
FBgn0035160	1043.75	-3.16323	0.484786	-6.52499	6.8006e-11	9.43926e-10
FBgn0051473	782.295	-3.16314	0.908553	-3.48152	0.000498575	0.00204457
FBgn0039251	1201.08	-3.15691	1.36975	-2.30473	0.0211815	0.0496678
FBgn0011239	336.36	-3.1569	1.1605	-2.7203	0.00652227	0.0187482
FBgn0036846	3083.98	-3.15655	0.240364	-13.1324	2.147e-39	3.35082e-37
FBgn0052755	139.446	-3.15489	1.19262	-2.64534	0.00816091	0.0225707
FBgn0265318	23.484	-3.15353	0.955313	-3.30105	0.00096324	0.00363163
FBgn0032414	679.898	-3.15028	0.188708	-16.694	1.44977e-62	8.46033e-60
FBgn0039010	1278	-3.15009	1.27049	-2.47943	0.0131592	0.0335466
FBgn0262996	14.5872	-3.14836	1.33037	-2.36654	0.0179554	0.0433603
FBgn0032615	137.817	-3.14589	0.605612	-5.19456	2.05208e-07	1.69599e-06
FBgn0264706	205.857	-3.14568	0.745905	-4.21727	2.47282e-05	0.000138292
FBgn0034850	360.414	-3.1451	1.09799	-2.86443	0.00417764	0.0129199
FBgn0035625	488.944	-3.14446	0.579446	-5.42667	5.74151e-08	5.21149e-07
FBgn0054021	199.383	-3.14315	1.11447	-2.82031	0.00479769	0.0145
FBgn0037385	202.108	-3.13017	1.28163	-2.44232	0.014593	0.036505
FBgn0053870	46.1825	-3.12898	0.862064	-3.62964	0.000283822	0.00124208
FBgn0034175	422.212	-3.12673	0.482653	-6.4782	9.28221e-11	1.25844e-09
FBgn0053817	30.1858	-3.12451	0.951966	-3.28216	0.00103013	0.00384816
FBgn0039881	789.982	-3.11784	1.29572	-2.40626	0.0161169	0.0396192
FBgn0037291	33.0472	-3.11636	1.03363	-3.01496	0.0025701	0.00853225
FBgn0039225	159.908	-3.11615	0.796272	-3.91343	9.09954e-05	0.000449187
FBgn0038311	347.185	-3.11563	0.929886	-3.35055	0.000806503	0.00311956
FBgn0051616	15.215	-3.11483	0.844334	-3.6891	0.00022505	0.00101181
FBgn0266200	22.3246	-3.10889	0.680524	-4.56838	4.9151e-06	3.17318e-05
FBgn0266815	29.9191	-3.10858	0.903278	-3.44144	0.000578618	0.00233641
FBgn0069938	147.347	-3.10759	1.0655	-2.91655	0.00353923	0.0112275
FBgn0052719	432.08	-3.1056	1.28032	-2.42565	0.015281	0.0379225
FBgn0030642	62.7325	-3.09965	0.458894	-6.75462	1.43212e-11	2.20182e-10
FBgn0010433	86.0768	-3.09876	0.840742	-3.68574	0.000228038	0.00102297
FBgn0036360	415.15	-3.09525	0.67263	-4.60172	4.19015e-06	2.74209e-05
FBgn0035522	316.836	-3.08744	0.529833	-5.8272	5.63636e-09	6.03279e-08
FBgn0000157	686.262	-3.08313	0.467733	-6.59166	4.34945e-11	6.21046e-10
FBgn0052006	89.9956	-3.07405	0.693382	-4.43341	9.27537e-06	5.64855e-05
FBgn0030313	528.68	-3.07364	1.25067	-2.4576	0.0139871	0.0352619
FBgn0019809	33.8807	-3.07094	0.563096	-5.45366	4.93427e-08	4.55174e-07
FBgn0053823	27.624	-3.06659	1.20459	-2.54575	0.0109045	0.0286643
FBgn0033440	501.626	-3.06557	0.677323	-4.52601	6.01073e-06	3.80958e-05
FBgn0262364	76.244	-3.06264	0.596615	-5.13335	2.84623e-07	2.29442e-06
FBgn0085256	87151	-3.04786	1.06755	-2.85499	0.00430378	0.013252
FBgn0266698	61.127	-3.04758	1.21231	-2.51386	0.0119417	0.0309724
FBgn0032969	642.943	-3.04587	0.91545	-3.32719	0.000877272	0.00335558
FBgn0037276	1617.55	-3.03287	1.0435	-2.90645	0.00365555	0.0115354
FBgn0035648	81.685	-3.03066	0.707621	-4.28289	1.84481e-05	0.000105862
FBgn0053242	5.99399	-3.02811	1.25961	-2.404	0.0162167	0.0398427
FBgn0053882	28.3751	-3.02696	0.695348	-4.35316	1.34188e-05	7.91329e-05
FBgn0263443	7.87353	-3.02322	1.27108	-2.37847	0.0173847	0.0421995
FBgn0052820	1189.44	-3.02216	1.16797	-2.58754	0.00966652	0.0259852
FBgn0035047	5834.09	-3.01991	0.782388	-3.85987	0.000113449	0.000549331
FBgn0263000	12.0306	-3.0152	0.996437	-3.02598	0.0024783	0.00825813
FBgn0263985	30.6361	-3.01502	1.26691	-2.37982	0.0173211	0.0420786
FBgn0023076	214.268	-3.01389	1.11227	-2.70969	0.00673467	0.0192653
FBgn0034566	2051.3	-3.01021	1.27193	-2.36665	0.0179498	0.0433548
FBgn0030721	393.238	-3.00948	1.27238	-2.36524	0.0180184	0.0434723
FBgn0051287	456.513	-3.00268	1.0039	-2.991	0.00278061	0.0091362
FBgn0267363	279.857	-2.99472	1.1725	-2.55413	0.0106453	0.0280765
FBgn0026263	587.529	-2.99152	0.440642	-6.78901	1.12906e-11	1.76008e-10
FBgn0265338	13.852	-2.98853	0.837706	-3.56751	0.000360385	0.00153559
FBgn0035621	8.22537	-2.98514	1.29019	-2.31372	0.0206828	0.0487197
FBgn0000355	55.5477	-2.97981	1.03764	-2.8717	0.00408264	0.0126669
FBgn0004882	1826.97	-2.97962	1.13527	-2.6246	0.00867515	0.0237848
FBgn0263617	109.535	-2.97884	0.663008	-4.49292	7.02543e-06	4.38583e-05
FBgn0261514	95.3225	-2.97613	1.21045	-2.45869	0.0139446	0.0351745
FBgn0002633	251.283	-2.97444	0.702457	-4.23433	2.29235e-05	0.000128898
FBgn0265253	23.0765	-2.97222	0.868504	-3.42223	0.000621099	0.00248477
FBgn0039501	2221.13	-2.97128	0.942903	-3.1512	0.001626	0.0057012
FBgn0031273	13.54	-2.96504	0.988101	-3.00074	0.00269325	0.00889925
FBgn0266780	66.2563	-2.96489	1.25356	-2.36519	0.018021	0.0434723
FBgn0031375	184.96	-2.96248	0.494256	-5.99382	2.04963e-09	2.3393e-08
FBgn0031515	1341.37	-2.96034	0.261347	-11.3272	9.61917e-30	7.63956e-28
FBgn0053664	299.036	-2.95815	1.11478	-2.65357	0.00796458	0.0221073
FBgn0004577	3500.44	-2.95594	0.322166	-9.17521	4.50707e-20	1.58777e-18
FBgn0046225	1854.91	-2.95529	0.574615	-5.14308	2.70275e-07	2.18928e-06
FBgn0052819	1167.07	-2.95339	1.21897	-2.42287	0.0153985	0.0381198
FBgn0264711	967.388	-2.93742	0.420085	-6.99243	2.70161e-12	4.52697e-11
FBgn0039568	159.831	-2.93597	0.809294	-3.62782	0.000285824	0.00124962
FBgn0004897	116.277	-2.93428	1.23	-2.38559	0.0170516	0.0414838
FBgn0265721	219.463	-2.93326	1.0174	-2.88309	0.00393798	0.0122891
FBgn0003267	12.1642	-2.93204	1.08857	-2.69347	0.00707122	0.0200443
FBgn0035661	12.1941	-2.93155	1.13264	-2.58825	0.00964639	0.0259363
FBgn0030296	305.443	-2.93104	1.25894	-2.32818	0.0199025	0.0471964
FBgn0039099	609.251	-2.92475	0.437549	-6.68439	2.31884e-11	3.45817e-10
FBgn0031858	1105.96	-2.92416	0.861342	-3.39489	0.000686563	0.00271163
FBgn0053890	30.7764	-2.92158	1.14274	-2.55664	0.0105689	0.0279189
FBgn0040763	440.265	-2.92115	0.930675	-3.13874	0.00169677	0.00592149
FBgn0032713	2012.13	-2.92093	0.426869	-6.84268	7.7727e-12	1.23902e-10
FBgn0030756	887.583	-2.91843	0.39109	-7.4623	8.50225e-14	1.67819e-12
FBgn0030359	721.052	-2.91652	0.962903	-3.02888	0.00245459	0.00818729
FBgn0040028	1366.69	-2.90972	1.05581	-2.75591	0.00585291	0.0171137
FBgn0266437	56.1286	-2.90738	0.643737	-4.51641	6.28975e-06	3.96715e-05
FBgn0052392	1716.39	-2.90631	0.969811	-2.99678	0.00272851	0.00899361
FBgn0031496	553.877	-2.90178	0.750582	-3.86604	0.000110616	0.00053814
FBgn0034502	678.853	-2.90009	1.11821	-2.59351	0.00950013	0.0256509
FBgn0261587	74.2911	-2.9	0.731874	-3.96243	7.41894e-05	0.000372808
FBgn0038725	1152.01	-2.89645	0.405142	-7.14922	8.72712e-13	1.53923e-11
FBgn0050271	839.216	-2.88958	0.987195	-2.92706	0.00342181	0.0109066
FBgn0052073	1204.86	-2.88403	0.576519	-5.00248	5.65962e-07	4.33334e-06
FBgn0029987	68.0108	-2.88114	1.21108	-2.37898	0.0173606	0.0421516
FBgn0053894	28.3099	-2.88029	1.11734	-2.57781	0.00994284	0.0265948
FBgn0053878	46.3302	-2.87759	0.939653	-3.0624	0.00219571	0.00743085
FBgn0053884	46.8687	-2.87681	0.795167	-3.61787	0.00029704	0.00129402
FBgn0032345	531.467	-2.87657	0.669825	-4.29451	1.75077e-05	0.000100637
FBgn0005677	1287.04	-2.87637	0.410716	-7.00331	2.49976e-12	4.20449e-11
FBgn0029890	464.127	-2.87504	1.19163	-2.4127	0.0158349	0.0390334
FBgn0035430	123.32	-2.87263	0.978287	-2.93639	0.00332054	0.0106419
FBgn0043069	570.477	-2.87051	0.753709	-3.80851	0.000139804	0.00065933
FBgn0014179	84.1042	-2.86395	0.75101	-3.81347	0.000137029	0.000647151
FBgn0002734	159.291	-2.86316	0.906803	-3.15742	0.00159171	0.00559557
FBgn0035856	51.9023	-2.85681	1.2139	-2.35341	0.0186019	0.0445688
FBgn0031574	3096	-2.85298	1.02173	-2.79229	0.00523364	0.0155825
FBgn0266985	62.2795	-2.85196	1.18419	-2.40837	0.0160238	0.0394338
FBgn0263079	23.2533	-2.8514	0.891349	-3.19897	0.00137921	0.00493252
FBgn0036677	93.8858	-2.84721	0.655267	-4.34512	1.39201e-05	8.16588e-05
FBgn0262988	139.919	-2.84441	1.09866	-2.58899	0.0096258	0.0259224
FBgn0036447	108.27	-2.83636	0.810195	-3.50084	0.00046379	0.00191435
FBgn0032067	5.66192	-2.83031	1.11194	-2.54537	0.0109161	0.0286837
FBgn0053252	307.714	-2.82981	1.22103	-2.31757	0.0204727	0.0483338
FBgn0040755	234.339	-2.82876	1.20135	-2.35465	0.0185403	0.044462
FBgn0259710	84.5374	-2.82678	0.439686	-6.42909	1.28366e-10	1.71607e-09
FBgn0051055	23.0667	-2.82472	1.02007	-2.76915	0.00562019	0.0165245
FBgn0000180	664.624	-2.82463	0.358117	-7.88746	3.08392e-15	7.0038e-14
FBgn0035167	53.3008	-2.82103	1.08715	-2.59488	0.00946231	0.0255745
FBgn0025387	590.04	-2.81539	1.09998	-2.5595	0.0104824	0.0277286
FBgn0026176	662.063	-2.81033	0.792684	-3.54533	0.00039212	0.00165452
FBgn0037837	91.6663	-2.81013	0.951343	-2.95386	0.00313831	0.0101207
FBgn0030770	393.664	-2.80764	1.2191	-2.30304	0.0212766	0.0498386
FBgn0267290	14.2419	-2.80753	0.916822	-3.06224	0.00219688	0.00743294
FBgn0052187	279	-2.8067	0.604466	-4.64327	3.42938e-06	2.27755e-05
FBgn0038952	904.936	-2.80551	0.425162	-6.59868	4.14837e-11	5.94866e-10
FBgn0026320	1172.81	-2.8049	0.276528	-10.1433	3.54946e-24	1.79777e-22
FBgn0030357	5529.67	-2.79918	0.44228	-6.32897	2.46808e-10	3.15792e-09
FBgn0025642	168.466	-2.79658	0.914196	-3.05907	0.00222029	0.00750269
FBgn0034286	312.914	-2.7961	0.387152	-7.22224	5.11394e-13	9.35141e-12
FBgn0003312	549.173	-2.79238	0.53902	-5.18047	2.21324e-07	1.82023e-06
FBgn0036587	777.273	-2.78948	0.851156	-3.27728	0.00104812	0.00390881
FBgn0036260	12.3521	-2.7887	0.818879	-3.40551	0.000660403	0.00262091
FBgn0031045	134.711	-2.78765	0.682256	-4.08592	4.39019e-05	0.000232695
FBgn0051702	167.076	-2.78351	1.20473	-2.31049	0.0208613	0.0490565
FBgn0026397	13.9807	-2.77933	0.955608	-2.90844	0.00363241	0.0114743
FBgn0035168	1137.28	-2.77725	1.03557	-2.68187	0.0073213	0.0206485
FBgn0264479	23.1666	-2.77467	0.629209	-4.40977	1.0348e-05	6.22548e-05
FBgn0028899	96.8624	-2.77301	1.19701	-2.31661	0.0205248	0.0484154
FBgn0267145	11.338	-2.77049	1.13555	-2.43978	0.0146964	0.0366917
FBgn0004666	71.4732	-2.76855	0.427349	-6.47843	9.2682e-11	1.25781e-09
FBgn0020378	1096.19	-2.7664	0.256223	-10.7969	3.56206e-27	2.2446e-25
FBgn0003255	142.721	-2.76296	0.315166	-8.76667	1.84021e-18	5.58809e-17
FBgn0037538	3042.48	-2.76286	0.246605	-11.2036	3.91521e-29	2.92676e-27
FBgn0052227	605.437	-2.75939	0.832885	-3.31305	0.000922855	0.00350596
FBgn0036369	957.397	-2.75863	0.592171	-4.6585	3.18519e-06	2.12801e-05
FBgn0039503	235.253	-2.74774	1.07834	-2.54813	0.0108303	0.0285084
FBgn0065110	16.7421	-2.74246	1.01698	-2.69666	0.00700396	0.0198831
FBgn0040906	112.766	-2.73468	0.974656	-2.80579	0.00501935	0.0150446
FBgn0038820	1258.42	-2.73362	1.01767	-2.68615	0.00722809	0.0204157
FBgn0032004	844.88	-2.72906	0.640211	-4.26275	2.01926e-05	0.000115036
FBgn0266260	14.8992	-2.72452	0.936638	-2.90883	0.00362785	0.0114626
FBgn0085371	27.5667	-2.71121	0.52237	-5.19021	2.10061e-07	1.73397e-06
FBgn0036731	249.316	-2.71086	0.694343	-3.90422	9.45308e-05	0.00046527
FBgn0038909	1359.21	-2.70968	0.832337	-3.25551	0.00113188	0.00415993
FBgn0034800	1101.23	-2.708	0.562645	-4.81298	1.48695e-06	1.05653e-05
FBgn0267745	16.7947	-2.69781	0.814773	-3.31112	0.000929243	0.00352624
FBgn0053500	11.4367	-2.69415	1.02104	-2.63864	0.00832391	0.0229365
FBgn0045064	1681.5	-2.691	0.359609	-7.48312	7.25795e-14	1.4432e-12
FBgn0051897	38.0454	-2.69034	0.610172	-4.40916	1.03774e-05	6.24037e-05
FBgn0037824	115.891	-2.69024	0.403589	-6.66578	2.6326e-11	3.90439e-10
FBgn0053888	38.2761	-2.68885	0.921419	-2.91816	0.003521	0.0111776
FBgn0035687	39.8437	-2.68478	0.715515	-3.75224	0.000175263	0.000807822
FBgn0038073	108.219	-2.68379	1.03101	-2.60305	0.00923973	0.0250739
FBgn0038447	25.462	-2.68287	0.584771	-4.5879	4.47721e-06	2.91714e-05
FBgn0027074	22.7625	-2.67973	0.933433	-2.87083	0.00409399	0.0126992
FBgn0031127	434.934	-2.67811	0.892408	-3.001	0.00269098	0.00889395
FBgn0266819	24.9261	-2.67539	0.671241	-3.98574	6.72704e-05	0.00034175
FBgn0030691	564.005	-2.66977	1.08944	-2.45059	0.0142622	0.0358526
FBgn0050036	65.9144	-2.66469	0.905398	-2.94312	0.00324925	0.0104359
FBgn0263511	107.214	-2.66267	0.396487	-6.71565	1.87229e-11	2.83634e-10
FBgn0037405	41.306	-2.65812	0.82632	-3.21682	0.0012962	0.00467174
FBgn0035481	1676.27	-2.65145	0.820809	-3.23028	0.00123667	0.00448732
FBgn0052111	162.928	-2.64877	0.31194	-8.49125	2.04419e-17	5.69234e-16
FBgn0267112	24.4299	-2.64797	0.918529	-2.88283	0.00394114	0.0122946
FBgn0000320	943.964	-2.64601	0.530501	-4.98775	6.10868e-07	4.64274e-06
FBgn0003326	630.076	-2.64181	0.429757	-6.14721	7.88568e-10	9.41651e-09
FBgn0030876	1546.65	-2.6412	0.339395	-7.78207	7.13472e-15	1.57245e-13
FBgn0053874	46.2273	-2.63883	0.927385	-2.84545	0.00443482	0.0135807
FBgn0262532	9.7098	-2.63142	1.04707	-2.51312	0.0119668	0.0310193
FBgn0264745	97.1839	-2.63054	0.522069	-5.03868	4.6876e-07	3.64525e-06
FBgn0028997	772.258	-2.63019	1.04666	-2.51292	0.0119735	0.0310308
FBgn0033885	187.868	-2.62739	0.819835	-3.20478	0.00135167	0.00485474
FBgn0025456	6632.46	-2.62716	0.445279	-5.90004	3.6342e-09	3.97217e-08
FBgn0027546	391.339	-2.62468	0.596282	-4.40174	1.07387e-05	6.44033e-05
FBgn0037730	1078.19	-2.62365	0.454128	-5.77735	7.58862e-09	7.8957e-08
FBgn0024740	259.383	-2.62351	0.311172	-8.43105	3.42573e-17	9.34555e-16
FBgn0033687	355.202	-2.61619	0.537767	-4.86492	1.14502e-06	8.30278e-06
FBgn0030494	2142.75	-2.61227	0.298769	-8.74346	2.26084e-18	6.83445e-17
FBgn0001263	19.6222	-2.61201	0.593884	-4.39819	1.09157e-05	6.53188e-05
FBgn0263345	63.0168	-2.61182	0.427601	-6.10808	1.00838e-09	1.19352e-08
FBgn0002631	42.8913	-2.61038	0.755181	-3.45663	0.000546966	0.00222331
FBgn0261583	33.4683	-2.60475	1.06299	-2.45039	0.01427	0.0358607
FBgn0262029	2428.72	-2.59934	0.198851	-13.0718	4.77048e-39	7.11437e-37
FBgn0019929	13.7272	-2.59681	1.02496	-2.53358	0.0112902	0.0295395
FBgn0051274	224.202	-2.59579	0.711351	-3.6491	0.000263158	0.00116188
FBgn0032446	68.032	-2.59372	0.657337	-3.94579	7.95361e-05	0.000397296
FBgn0051627	160.983	-2.59128	0.603991	-4.29027	1.78458e-05	0.000102493
FBgn0039749	32.6231	-2.58598	0.683313	-3.78448	0.000154029	0.000718339
FBgn0267187	9.22936	-2.58349	1.08321	-2.38503	0.0170776	0.0415396
FBgn0003513	186.531	-2.58256	0.286992	-8.9987	2.28407e-19	7.51391e-18
FBgn0004863	206.441	-2.58231	0.327573	-7.88317	3.19172e-15	7.212e-14
FBgn0263048	1868.26	-2.58031	0.517376	-4.9873	6.12302e-07	4.64837e-06
FBgn0265530	12.7091	-2.5645	0.992247	-2.58454	0.00975096	0.0261441
FBgn0262858	298.037	-2.5643	0.939607	-2.72912	0.0063503	0.018318
FBgn0000241	754.111	-2.56417	0.512856	-4.99978	5.7395e-07	4.38699e-06
FBgn0037375	1046.59	-2.55823	0.793809	-3.22273	0.00126974	0.00458748
FBgn0267730	40.8987	-2.5576	0.508652	-5.02819	4.95137e-07	3.83924e-06
FBgn0035768	293.303	-2.55274	0.82849	-3.08119	0.00206175	0.00703962
FBgn0002533	40771	-2.54381	1.08174	-2.35159	0.0186934	0.0447402
FBgn0036678	403.059	-2.54376	0.208263	-12.2142	2.61166e-34	2.78204e-32
FBgn0000560	60.8479	-2.54148	0.752204	-3.37871	0.000728273	0.00285481
FBgn0026255	31.2941	-2.5397	0.724342	-3.50622	0.000454526	0.00188117
FBgn0053223	216.599	-2.53812	0.453915	-5.59163	2.24951e-08	2.18472e-07
FBgn0267035	34.0066	-2.53768	0.916504	-2.76887	0.00562506	0.0165352
FBgn0030979	397.309	-2.53222	0.925161	-2.73706	0.00619905	0.0179551
FBgn0051183	848.025	-2.52186	0.42273	-5.96565	2.43665e-09	2.74138e-08
FBgn0039809	2444	-2.51873	0.234203	-10.7545	5.64608e-27	3.52473e-25
FBgn0004003	1007.43	-2.51771	0.576844	-4.36463	1.2734e-05	7.53931e-05
FBgn0034903	4612.37	-2.51532	0.496214	-5.06902	3.99876e-07	3.15714e-06
FBgn0261046	329.832	-2.51128	0.50429	-4.97983	6.36386e-07	4.81759e-06
FBgn0003482	15.8391	-2.51033	0.999712	-2.51106	0.012037	0.0311592
FBgn0037974	785.625	-2.50965	0.480986	-5.21773	1.81132e-07	1.51474e-06
FBgn0001134	94.6258	-2.50926	0.528846	-4.74478	2.08737e-06	1.44267e-05
FBgn0053060	219.32	-2.50783	0.724987	-3.45913	0.000541915	0.00220545
FBgn0264490	132.538	-2.5076	1.01842	-2.46226	0.0138065	0.0348853
FBgn0032271	212.621	-2.50473	0.535214	-4.67987	2.8706e-06	1.94298e-05
FBgn0030014	320.289	-2.50151	1.04506	-2.39365	0.0166816	0.0407387
FBgn0032047	1129.34	-2.50054	0.755579	-3.30944	0.000934817	0.00354538
FBgn0262971	49.042	-2.49742	1.07755	-2.31769	0.0204664	0.0483286
FBgn0000153	2457.29	-2.49459	0.971434	-2.56795	0.0102303	0.0271849
FBgn0029924	1285.46	-2.49117	0.310397	-8.02576	1.00897e-15	2.40114e-14
FBgn0053880	45.0943	-2.48521	0.894755	-2.77753	0.00547732	0.0161824
FBgn0013277	106.669	-2.4824	0.999105	-2.48462	0.0129688	0.0331494
FBgn0002632	60.8722	-2.47631	0.673933	-3.67441	0.000238399	0.00106341
FBgn0250839	471.394	-2.47315	0.326661	-7.571	3.70373e-14	7.69528e-13
FBgn0264746	76.7091	-2.47276	0.373163	-6.6265	3.43746e-11	5.01496e-10
FBgn0053061	285.795	-2.46917	0.746257	-3.30875	0.000937151	0.00354746
FBgn0036665	39.5113	-2.46435	1.03105	-2.39013	0.0168423	0.0410417
FBgn0004896	129.294	-2.4616	0.657274	-3.74517	0.000180271	0.000828628
FBgn0264273	561.275	-2.45797	0.37041	-6.63581	3.22735e-11	4.71869e-10
FBgn0085488	652.814	-2.45386	0.799926	-3.06761	0.00215777	0.00732463
FBgn0004959	727.281	-2.45243	0.41937	-5.8479	4.97816e-09	5.36681e-08
FBgn0031907	14737.9	-2.44915	0.520062	-4.70935	2.48506e-06	1.70176e-05
FBgn0032637	1580.08	-2.44915	0.467971	-5.23355	1.66281e-07	1.4019e-06
FBgn0288700	151.834	-2.44706	0.554133	-4.41602	1.00535e-05	6.06193e-05
FBgn0053993	187.704	-2.44509	0.541671	-4.51399	6.362e-06	4.00707e-05
FBgn0032478	34.1789	-2.44154	0.977798	-2.49698	0.0125258	0.0322256
FBgn0033258	1112.6	-2.44142	0.735578	-3.31905	0.000903255	0.00344124
FBgn0008636	91.9748	-2.44046	0.837486	-2.91403	0.00356796	0.011301
FBgn0085420	37.6451	-2.43907	0.644459	-3.78468	0.000153906	0.000718014
FBgn0032431	191.534	-2.43289	0.56915	-4.2746	1.91481e-05	0.000109644
FBgn0024184	200.449	-2.41705	0.484758	-4.98608	6.16153e-07	4.67496e-06
FBgn0266591	28.9297	-2.41497	0.6659	-3.62662	0.000287154	0.00125503
FBgn0000071	4634.48	-2.40966	0.498841	-4.83053	1.36171e-06	9.74249e-06
FBgn0028952	256.601	-2.40899	0.837782	-2.87544	0.00403459	0.012544
FBgn0004650	172.597	-2.4089	0.993922	-2.42363	0.0153661	0.0380665
FBgn0030242	948.977	-2.40676	0.693057	-3.47268	0.000515289	0.00210732
FBgn0020641	12.5483	-2.40388	0.858379	-2.80049	0.00510249	0.0152631
FBgn0264005	119.245	-2.40341	0.699022	-3.43824	0.000585503	0.0023583
FBgn0264954	8.50938	-2.40019	0.920424	-2.6077	0.00911518	0.024776
FBgn0027513	571.198	-2.39329	0.513251	-4.66299	3.11647e-06	2.08937e-05
FBgn0040696	279.837	-2.39312	1.00102	-2.39068	0.016817	0.0410024
FBgn0019952	4642.61	-2.39088	0.356116	-6.71376	1.89668e-11	2.87004e-10
FBgn0037581	428.43	-2.38502	0.881338	-2.70614	0.0068071	0.0194187
FBgn0030982	160.161	-2.37014	0.711851	-3.32955	0.00086987	0.00333012
FBgn0267118	8.33656	-2.36934	1.00462	-2.35845	0.0183513	0.0441259
FBgn0051075	13403.8	-2.36437	0.315025	-7.50534	6.12704e-14	1.22559e-12
FBgn0265457	25.3277	-2.36329	0.813161	-2.9063	0.00365733	0.0115365
FBgn0031725	58.5139	-2.36084	0.363881	-6.48795	8.70112e-11	1.19048e-09
FBgn0037664	748.692	-2.35763	0.829095	-2.84362	0.00446045	0.0136498
FBgn0000808	32.1575	-2.35706	0.721568	-3.26658	0.00108854	0.00403491
FBgn0034470	28082.9	-2.34865	0.33557	-6.99898	2.57828e-12	4.32571e-11
FBgn0051658	54.1378	-2.34805	0.777325	-3.02068	0.00252206	0.00838935
FBgn0038296	1202.5	-2.34737	0.973884	-2.41032	0.0159386	0.0392384
FBgn0052582	156.076	-2.34381	0.968223	-2.42073	0.0154892	0.0382795
FBgn0034612	677.907	-2.33517	0.598522	-3.90157	9.55718e-05	0.000469877
FBgn0039283	265.73	-2.33102	0.322992	-7.21697	5.31594e-13	9.69438e-12
FBgn0039449	603.422	-2.32692	0.836841	-2.7806	0.00542593	0.0160588
FBgn0034443	8735.25	-2.32224	0.687437	-3.37811	0.000729861	0.0028602
FBgn0027608	1746.96	-2.31365	0.255243	-9.0645	1.25176e-19	4.23203e-18
FBgn0261016	131.232	-2.31251	0.658895	-3.50968	0.000448638	0.00186313
FBgn0035957	833.678	-2.31227	0.793626	-2.91355	0.00357346	0.0113147
FBgn0085250	27.4059	-2.30914	0.557545	-4.14162	3.44864e-05	0.000187814
FBgn0034366	1241.88	-2.30751	0.244216	-9.44866	3.43196e-21	1.39587e-19
FBgn0038815	585.377	-2.30349	0.483494	-4.76425	1.8956e-06	1.31896e-05
FBgn0004854	386.397	-2.29746	0.320863	-7.16025	8.05314e-13	1.4241e-11
FBgn0034396	970.307	-2.29694	0.368042	-6.24098	4.34843e-10	5.35948e-09
FBgn0030187	81.8769	-2.29615	0.624833	-3.67483	0.000238011	0.00106203
FBgn0032481	3683.96	-2.28794	0.490151	-4.66782	3.04409e-06	2.04699e-05
FBgn0037924	2405.58	-2.28609	0.626656	-3.64807	0.000264215	0.00116578
FBgn0011817	2401.2	-2.28297	0.336629	-6.78187	1.18633e-11	1.84507e-10
FBgn0030900	60.6728	-2.28261	0.685859	-3.3281	0.000874407	0.00334558
FBgn0036520	377.742	-2.28098	0.746239	-3.05664	0.00223832	0.00755223
FBgn0005612	5540.92	-2.27724	0.559946	-4.06689	4.76455e-05	0.000250293
FBgn0003254	365.94	-2.277	0.864655	-2.63341	0.00845311	0.02324
FBgn0267810	28.8661	-2.27615	0.559732	-4.06649	4.77256e-05	0.000250518
FBgn0031393	76.6845	-2.27198	0.463348	-4.90339	9.41956e-07	6.93904e-06
FBgn0032474	5060.3	-2.27164	0.201298	-11.2849	1.55766e-29	1.22262e-27
FBgn0266977	98.936	-2.269	0.576255	-3.93748	8.23408e-05	0.000410237
FBgn0000405	3146.36	-2.26361	0.437819	-5.1702	2.33841e-07	1.91612e-06
FBgn0287720	12896.6	-2.26295	0.533343	-4.24295	2.20596e-05	0.00012451
FBgn0053926	1535.86	-2.26178	0.631911	-3.57926	0.000344568	0.00147477
FBgn0283741	4075.04	-2.25484	0.380561	-5.92504	3.12219e-09	3.44339e-08
FBgn0035699	525.434	-2.25319	0.380964	-5.91444	3.3301e-09	3.65168e-08
FBgn0003719	575.867	-2.25307	0.417612	-5.39514	6.84718e-08	6.13503e-07
FBgn0025697	460.348	-2.25179	0.287201	-7.84046	4.48916e-15	9.9923e-14
FBgn0035099	956.672	-2.2502	0.582329	-3.86414	0.000111482	0.000542143
FBgn0028999	1234.75	-2.24982	0.660556	-3.40595	0.000659339	0.00261857
FBgn0262893	30.3965	-2.24506	0.632442	-3.54983	0.000385484	0.00162857
FBgn0033767	304.917	-2.24079	0.774037	-2.89494	0.0037923	0.0118982
FBgn0002592	635.923	-2.24012	0.48958	-4.5756	4.74867e-06	3.07609e-05
FBgn0004374	1562.43	-2.23726	0.438387	-5.10339	3.33624e-07	2.65279e-06
FBgn0284247	2339.63	-2.22891	0.205368	-10.8532	1.92459e-27	1.23597e-25
FBgn0008646	643.888	-2.22786	0.150861	-14.7676	2.37074e-49	6.77021e-47
FBgn0038070	124.509	-2.22534	0.55139	-4.03588	5.43991e-05	0.000282738
FBgn0035231	1259.3	-2.22443	0.447595	-4.96974	6.70436e-07	5.06963e-06
FBgn0264712	3007.42	-2.218	0.267049	-8.30561	9.93083e-17	2.58819e-15
FBgn0261953	362.445	-2.20777	0.508165	-4.3446	1.39527e-05	8.17789e-05
FBgn0034990	36.2037	-2.20565	0.550207	-4.00877	6.10369e-05	0.000314046
FBgn0266521	4088.93	-2.20408	0.219926	-10.0219	1.22163e-23	5.87694e-22
FBgn0031384	668.085	-2.20275	0.539379	-4.08387	4.4291e-05	0.000234506
FBgn0030803	760.311	-2.19845	0.43164	-5.09324	3.51994e-07	2.79473e-06
FBgn0002715	684.535	-2.19	0.595452	-3.67788	0.000235181	0.00105115
FBgn0014395	406.821	-2.18901	0.663913	-3.29713	0.000976797	0.00367449
FBgn0000557	4093.27	-2.18439	0.493931	-4.42245	9.75861e-06	5.90532e-05
FBgn0028980	1222.21	-2.18434	0.254049	-8.59809	8.10552e-18	2.32462e-16
FBgn0267668	345.573	-2.18406	0.479722	-4.55276	5.29465e-06	3.38243e-05
FBgn0001089	785.527	-2.18295	0.397592	-5.49043	4.00959e-08	3.73728e-07
FBgn0031675	377.942	-2.18036	0.76311	-2.85721	0.00427388	0.013172
FBgn0031939	1468.54	-2.17773	0.235862	-9.23307	2.62983e-20	9.48859e-19
FBgn0051163	989.491	-2.17278	0.170518	-12.7423	3.44283e-37	4.44324e-35
FBgn0031100	50.4302	-2.1725	0.918942	-2.36413	0.0180724	0.0435567
FBgn0033132	639.758	-2.16777	0.452159	-4.79426	1.63278e-06	1.15161e-05
FBgn0265575	1997.42	-2.16516	0.433609	-4.99335	5.93398e-07	4.51507e-06
FBgn0003087	352.739	-2.16405	0.372166	-5.81473	6.07315e-09	6.43869e-08
FBgn0038150	40.8342	-2.16201	0.602419	-3.58888	0.000332106	0.00142778
FBgn0267124	15.1193	-2.1601	0.735046	-2.93873	0.00329556	0.0105669
FBgn0263871	17.6151	-2.15945	0.916707	-2.35567	0.0184896	0.0444027
FBgn0027505	3485.02	-2.1594	0.444071	-4.86272	1.15783e-06	8.37757e-06
FBgn0038959	167.904	-2.15803	0.380138	-5.67696	1.37111e-08	1.37849e-07
FBgn0033313	17588.9	-2.15444	0.311766	-6.91046	4.83101e-12	7.90754e-11
FBgn0286204	45.425	-2.15083	0.748867	-2.87212	0.00407732	0.0126592
FBgn0085409	593.35	-2.15022	0.371252	-5.79181	6.96324e-09	7.29591e-08
FBgn0038213	515.924	-2.15001	0.328889	-6.53719	6.26839e-11	8.764e-10
FBgn0031741	763.692	-2.14663	0.381521	-5.62651	1.83891e-08	1.81085e-07
FBgn0259168	3946.59	-2.14408	0.323904	-6.6195	3.60404e-11	5.2409e-10
FBgn0039356	168.069	-2.14062	0.380377	-5.62763	1.82705e-08	1.80181e-07
FBgn0039972	138.797	-2.13754	0.612688	-3.48879	0.000485204	0.00199522
FBgn0267792	2605.81	-2.13746	0.271235	-7.8805	3.26084e-15	7.35335e-14
FBgn0035725	297.055	-2.13711	0.511949	-4.17446	2.98687e-05	0.000164911
FBgn0030542	65.4552	-2.13676	0.875216	-2.44141	0.01463	0.0365806
FBgn0053200	31.4954	-2.13503	0.656871	-3.2503	0.00115284	0.00422656
FBgn0037624	173.231	-2.13301	0.451552	-4.72374	2.31551e-06	1.5946e-05
FBgn0000078	3840.75	-2.13176	0.666325	-3.19929	0.00137768	0.00492966
FBgn0035211	816.202	-2.13136	0.280643	-7.59456	3.08852e-14	6.44698e-13
FBgn0036549	1160.3	-2.12876	0.226753	-9.38802	6.11402e-21	2.39949e-19
FBgn0051646	143.775	-2.12683	0.396993	-5.35736	8.44467e-08	7.45197e-07
FBgn0054007	8.56029	-2.12452	0.876856	-2.42288	0.0153979	0.0381198
FBgn0040778	314.257	-2.12328	0.422416	-5.02651	4.99488e-07	3.86527e-06
FBgn0051774	109.596	-2.12285	0.710092	-2.98954	0.00279401	0.00917573
FBgn0260955	200.789	-2.12116	0.453081	-4.68165	2.84578e-06	1.92812e-05
FBgn0041246	34.2823	-2.11965	0.56573	-3.74676	0.000179134	0.00082425
FBgn0033438	411.269	-2.11016	0.384787	-5.48398	4.15858e-08	3.87077e-07
FBgn0035983	3256.1	-2.10938	0.289303	-7.29126	3.07077e-13	5.7564e-12
FBgn0031896	1857.73	-2.10737	0.589451	-3.57514	0.00035004	0.0014953
FBgn0003975	248.746	-2.10398	0.347133	-6.061	1.35274e-09	1.57471e-08
FBgn0038492	235.12	-2.10235	0.567224	-3.70638	0.000210241	0.000952364
FBgn0053143	477.343	-2.09993	0.298121	-7.04388	1.86953e-12	3.20471e-11
FBgn0035260	401.824	-2.09522	0.277925	-7.53882	4.74242e-14	9.73284e-13
FBgn0035497	7258.87	-2.09199	0.493358	-4.24031	2.23215e-05	0.000125829
FBgn0052313	238.776	-2.08888	0.497995	-4.19458	2.73382e-05	0.0001515
FBgn0029123	1606.48	-2.08205	0.503444	-4.13561	3.54015e-05	0.00019245
FBgn0261649	969.761	-2.06931	0.279043	-7.41575	1.20938e-13	2.35251e-12
FBgn0267119	66.9011	-2.06929	0.609349	-3.3959	0.000684025	0.0027048
FBgn0046258	1354.31	-2.06914	0.339885	-6.08776	1.145e-09	1.3469e-08
FBgn0039065	670.918	-2.06845	0.485643	-4.2592	2.05156e-05	0.000116777
FBgn0039355	187.169	-2.06757	0.464477	-4.45139	8.53174e-06	5.23847e-05
FBgn0039009	25.9187	-2.0651	0.499644	-4.13315	3.57825e-05	0.000194285
FBgn0051354	295.587	-2.0623	0.722854	-2.853	0.00433082	0.0133169
FBgn0039189	975.916	-2.05822	0.359345	-5.72769	1.01809e-08	1.04711e-07
FBgn0030114	5540.55	-2.05738	0.573104	-3.5899	0.000330811	0.00142312
FBgn0025360	811.829	-2.05663	0.700553	-2.93572	0.00332778	0.01066
FBgn0083068	311.504	-2.05539	0.435203	-4.72284	2.32578e-06	1.60003e-05
FBgn0287186	204.237	-2.05512	0.381208	-5.39109	7.00332e-08	6.25823e-07
FBgn0264305	2029.64	-2.05	0.497158	-4.12343	3.73268e-05	0.000201447
FBgn0265276	3120.72	-2.04902	0.428283	-4.78427	1.71613e-06	1.2047e-05
FBgn0034705	482.666	-2.04654	0.275161	-7.43761	1.02526e-13	2.00892e-12
FBgn0263236	2984	-2.04307	0.238872	-8.55298	1.19946e-17	3.39646e-16
FBgn0032467	10586.7	-2.03189	0.261075	-7.78278	7.09476e-15	1.56621e-13
FBgn0003187	763.592	-2.03117	0.723898	-2.80588	0.00501792	0.0150437
FBgn0039078	262.359	-2.02735	0.692565	-2.92731	0.00341912	0.0109006
FBgn0016076	5189.52	-2.0255	0.63846	-3.17247	0.00151147	0.005357
FBgn0263494	232.63	-2.02527	0.309537	-6.5429	6.03373e-11	8.46235e-10
FBgn0266805	17.4605	-2.02099	0.587727	-3.43865	0.000584629	0.00235572
FBgn0039130	3182.5	-2.0134	0.181779	-11.0761	1.63877e-28	1.13967e-26
FBgn0039804	359.226	-2.01218	0.341482	-5.89248	3.80431e-09	4.14123e-08
FBgn0004784	20.606	-2.01162	0.680764	-2.95495	0.00312723	0.0100922
FBgn0029970	218.095	-2.00927	0.473478	-4.24364	2.19925e-05	0.000124235
FBgn0260226	49182.4	-2.00526	0.845882	-2.37061	0.0177586	0.0429647
FBgn0037153	925.368	-2.00458	0.298125	-6.72398	1.76822e-11	2.69303e-10
FBgn0020300	1490.64	-2.0004	0.273462	-7.31512	2.57152e-13	4.85443e-12
FBgn0051690	277.71	-1.99805	0.278052	-7.18588	6.67779e-13	1.19347e-11
FBgn0067861	992.128	-1.99457	0.539816	-3.69491	0.000219967	0.000992401
FBgn0013279	152.463	-1.98495	0.84829	-2.33995	0.0192865	0.0459467
FBgn0000166	16.6483	-1.98067	0.709234	-2.79269	0.00522713	0.01557
FBgn0003302	1136.88	-1.9806	0.31085	-6.37158	1.87089e-10	2.43089e-09
FBgn0002629	486.894	-1.97816	0.568676	-3.47854	0.000504152	0.00206429
FBgn0263072	1290.31	-1.97759	0.514987	-3.84007	0.000123002	0.000588986
FBgn0032399	229.769	-1.97594	0.469549	-4.20817	2.57452e-05	0.000143502
FBgn0250835	125.863	-1.9653	0.79559	-2.47024	0.0135021	0.0342387
FBgn0266225	32.9173	-1.96465	0.595064	-3.30159	0.000961393	0.00362662
FBgn0003545	876.194	-1.96306	0.625631	-3.13772	0.00170267	0.005939
FBgn0000577	605.972	-1.96163	0.372328	-5.26855	1.37508e-07	1.17781e-06
FBgn0000114	3245.58	-1.95992	0.356563	-5.4967	3.86955e-08	3.61679e-07
FBgn0035767	1943.44	-1.95774	0.184356	-10.6193	2.4238e-26	1.43314e-24
FBgn0031053	712.637	-1.95609	0.235337	-8.31188	9.41947e-17	2.4693e-15
FBgn0032727	6460.62	-1.95134	0.24247	-8.04778	8.43119e-16	2.02802e-14
FBgn0033817	29.565	-1.95105	0.600815	-3.24733	0.00116492	0.00426154
FBgn0283434	1536.52	-1.94819	0.444909	-4.37884	1.19312e-05	7.09015e-05
FBgn0053499	1496.14	-1.94476	0.368408	-5.27883	1.30011e-07	1.11788e-06
FBgn0028499	536.761	-1.94083	0.354457	-5.47549	4.36293e-08	4.04135e-07
FBgn0020248	79.626	-1.9404	0.516562	-3.75637	0.000172394	0.000795416
FBgn0039045	23.5135	-1.93579	0.53285	-3.63289	0.000280262	0.0012281
FBgn0087012	132.405	-1.93436	0.281023	-6.88327	5.8496e-12	9.47085e-11
FBgn0261526	168.466	-1.93257	0.352564	-5.48148	4.21786e-08	3.91779e-07
FBgn0032211	9.68095	-1.93216	0.78946	-2.44745	0.0143871	0.0360941
FBgn0034103	46.7427	-1.93143	0.638473	-3.02507	0.00248573	0.00828085
FBgn0243486	661.891	-1.93122	0.22165	-8.71294	2.96099e-18	8.89092e-17
FBgn0260777	26.5988	-1.92934	0.736424	-2.61988	0.00879607	0.0240733
FBgn0000147	907.563	-1.9278	0.684198	-2.8176	0.00483842	0.0146034
FBgn0039530	367.376	-1.92509	0.373469	-5.15462	2.54144e-07	2.0661e-06
FBgn0036790	46.9249	-1.92277	0.484778	-3.9663	7.29983e-05	0.000367511
FBgn0000053	8995.92	-1.92177	0.50953	-3.77165	0.00016217	0.000750827
FBgn0035790	14.9995	-1.92046	0.764555	-2.51187	0.0120094	0.0311057
FBgn0037085	20.6957	-1.91733	0.786772	-2.43696	0.0148114	0.0369446
FBgn0035691	430.325	-1.91554	0.757141	-2.52997	0.0114073	0.0297859
FBgn0010300	4041.81	-1.91511	0.313072	-6.11715	9.52643e-10	1.12954e-08
FBgn0033277	27.3986	-1.91509	0.800596	-2.39208	0.0167531	0.0408688
FBgn0015904	845.739	-1.91424	0.203619	-9.4011	5.39978e-21	2.15062e-19
FBgn0028897	293.793	-1.91405	0.432733	-4.42315	9.72707e-06	5.89155e-05
FBgn0035948	55.4591	-1.91365	0.777684	-2.4607	0.0138665	0.0350106
FBgn0033845	2763.49	-1.91284	0.3823	-5.00351	5.62951e-07	4.3152e-06
FBgn0051467	312.167	-1.91196	0.564122	-3.38927	0.000700801	0.00276164
FBgn0000061	589.744	-1.91004	0.404725	-4.71934	2.36607e-06	1.62442e-05
FBgn0037292	266.818	-1.908	0.641404	-2.97473	0.00293247	0.00955331
FBgn0038079	859.701	-1.90697	0.595435	-3.20265	0.00136171	0.00488163
FBgn0033274	566.448	-1.90559	0.552963	-3.44615	0.000568632	0.00230093
FBgn0050181	68.4313	-1.90484	0.776581	-2.45285	0.0141729	0.0356634
FBgn0085407	179.511	-1.90467	0.511371	-3.72462	0.000195606	0.000892091
FBgn0037195	559.101	-1.90354	0.407987	-4.66569	3.07579e-06	2.0652e-05
FBgn0035964	5271.03	-1.90326	0.243887	-7.80384	6.00529e-15	1.32789e-13
FBgn0053208	9437.88	-1.90171	0.321242	-5.91986	3.22214e-09	3.54779e-08
FBgn0037933	3351.31	-1.89855	0.202366	-9.38174	6.48921e-21	2.51729e-19
FBgn0004898	325.446	-1.89841	0.302512	-6.27547	3.48585e-10	4.36854e-09
FBgn0265046	113.243	-1.89728	0.329876	-5.75149	8.84613e-09	9.16148e-08
FBgn0031878	3193.7	-1.89263	0.499945	-3.78567	0.000153295	0.00071616
FBgn0000567	7354.87	-1.89228	0.603913	-3.13336	0.00172816	0.00601852
FBgn0037980	842.932	-1.89049	0.287788	-6.56903	5.06445e-11	7.17037e-10
FBgn0029596	22.9975	-1.88969	0.673595	-2.80537	0.00502581	0.0150572
FBgn0038468	48.2745	-1.88921	0.478986	-3.94418	8.00731e-05	0.000399829
FBgn0011606	2072.98	-1.88868	0.571984	-3.30198	0.000960051	0.00362266
FBgn0031378	518.588	-1.88788	0.749731	-2.51808	0.0117998	0.0306456
FBgn0031568	223.32	-1.88424	0.342958	-5.49409	3.92735e-08	3.66761e-07
FBgn0039632	3134.68	-1.88281	0.29035	-6.48462	8.89545e-11	1.21213e-09
FBgn0032219	925.933	-1.88182	0.689338	-2.7299	0.00633543	0.018283
FBgn0036763	3194.84	-1.88144	0.716365	-2.62637	0.00863019	0.0236977
FBgn0051955	354.147	-1.87913	0.544086	-3.45374	0.00055288	0.00224531
FBgn0003339	402.95	-1.87497	0.325686	-5.757	8.56223e-09	8.88117e-08
FBgn0003447	3000.04	-1.87246	0.346272	-5.40748	6.39175e-08	5.75772e-07
FBgn0011653	375.702	-1.87238	0.329696	-5.67911	1.35399e-08	1.36436e-07
FBgn0067317	112.159	-1.8708	0.590479	-3.16827	0.00153351	0.00542224
FBgn0000591	416.918	-1.86955	0.390537	-4.78713	1.69181e-06	1.18873e-05
FBgn0035041	420.69	-1.8661	0.409578	-4.55614	5.21012e-06	3.34595e-05
FBgn0011758	153.509	-1.86472	0.25517	-7.30776	2.71632e-13	5.12058e-12
FBgn0013323	89.7577	-1.85936	0.539199	-3.44837	0.000563983	0.00228625
FBgn0264998	21.6241	-1.85477	0.661681	-2.80311	0.0050612	0.0151565
FBgn0286051	3619.39	-1.85098	0.49367	-3.74943	0.000177234	0.000815788
FBgn0028372	800.672	-1.85016	0.382861	-4.83246	1.34858e-06	9.65885e-06
FBgn0034476	1936.37	-1.84979	0.190543	-9.70798	2.78804e-22	1.21497e-20
FBgn0019661	14420.6	-1.84975	0.544179	-3.39916	0.000675933	0.00267464
FBgn0263027	269.657	-1.84638	0.622538	-2.96589	0.00301804	0.00980826
FBgn0250907	12654.6	-1.84524	0.457645	-4.03203	5.52979e-05	0.000287121
FBgn0287454	1177.69	-1.84188	0.185796	-9.91348	3.63739e-23	1.70703e-21
FBgn0015380	1098.12	-1.83756	0.456546	-4.02491	5.69978e-05	0.000295034
FBgn0030625	953.626	-1.83632	0.379051	-4.84453	1.26913e-06	9.12873e-06
FBgn0032705	824.422	-1.83562	0.611458	-3.00203	0.00268183	0.00887025
FBgn0031895	593.996	-1.83522	0.480143	-3.82224	0.000132245	0.000627204
FBgn0031275	290.369	-1.82885	0.728143	-2.51166	0.0120164	0.031118
FBgn0037378	2568.01	-1.82795	0.413114	-4.4248	9.65336e-06	5.85531e-05
FBgn0000028	157.631	-1.82681	0.477497	-3.82581	0.000130345	0.000619069
FBgn0038202	330.736	-1.8261	0.730162	-2.50096	0.0123858	0.0319145
FBgn0010452	1040.48	-1.82472	0.437589	-4.16995	3.04668e-05	0.000167661
FBgn0044028	201.232	-1.81986	0.249306	-7.29971	2.88382e-13	5.4211e-12
FBgn0001075	2457.94	-1.81887	0.184629	-9.85149	6.75355e-23	3.11499e-21
FBgn0051453	1450.05	-1.81194	0.265901	-6.81435	9.46897e-12	1.48836e-10
FBgn0265192	3234.84	-1.81087	0.290509	-6.23345	4.5627e-10	5.60811e-09
FBgn0026147	2406.23	-1.80937	0.537558	-3.36591	0.000762915	0.00297152
FBgn0037021	2409.08	-1.80909	0.299711	-6.03612	1.57865e-09	1.82346e-08
FBgn0000492	701.645	-1.80392	0.252322	-7.14929	8.72308e-13	1.53923e-11
FBgn0038332	358.105	-1.80372	0.556473	-3.24135	0.00118964	0.00434251
FBgn0051953	361.335	-1.80316	0.237402	-7.59539	3.0687e-14	6.4156e-13
FBgn0263384	125.431	-1.80282	0.574535	-3.13788	0.00170177	0.00593738
FBgn0263975	44.5884	-1.79995	0.428967	-4.19602	2.71647e-05	0.000150725
FBgn0000287	924.663	-1.79815	0.279006	-6.44483	1.15731e-10	1.55179e-09
FBgn0039723	52.5253	-1.79617	0.55808	-3.21848	0.00128872	0.00464978
FBgn0265296	372.103	-1.79527	0.541081	-3.31793	0.000906862	0.00345302
FBgn0004360	619.972	-1.79252	0.184164	-9.73329	2.17446e-22	9.62658e-21
FBgn0040038	440.282	-1.79003	0.263729	-6.78739	1.14178e-11	1.77785e-10
FBgn0033599	74.6759	-1.78454	0.721408	-2.47369	0.0133727	0.0339619
FBgn0050263	32.2795	-1.78366	0.597576	-2.98483	0.00283735	0.00929079
FBgn0011802	615.242	-1.7779	0.391885	-4.5368	5.71138e-06	3.63654e-05
FBgn0038917	227.431	-1.77771	0.42244	-4.2082	2.57411e-05	0.000143502
FBgn0267337	459.523	-1.77611	0.570862	-3.11128	0.0018628	0.00643399
FBgn0039683	164.51	-1.77427	0.547502	-3.24066	0.00119255	0.00435033
FBgn0031717	2144.32	-1.77304	0.244487	-7.2521	4.1037e-13	7.56592e-12
FBgn0287775	1529.49	-1.77078	0.303112	-5.842	5.15792e-09	5.54225e-08
FBgn0051044	249.079	-1.77059	0.412185	-4.29562	1.74205e-05	0.000100222
FBgn0264502	310.614	-1.7695	0.333818	-5.3008	1.15296e-07	9.97098e-07
FBgn0032879	55.7053	-1.76376	0.401443	-4.39355	1.11516e-05	6.66418e-05
FBgn0036240	531.223	-1.76133	0.222167	-7.92798	2.22745e-15	5.14574e-14
FBgn0033990	661.764	-1.76002	0.456508	-3.85539	0.000115545	0.000558462
FBgn0039742	793.806	-1.75966	0.6448	-2.729	0.00635259	0.0183207
FBgn0000216	310.765	-1.75669	0.7504	-2.341	0.0192323	0.0458256
FBgn0036454	6084.41	-1.75558	0.486835	-3.60611	0.000310825	0.00134491
FBgn0040102	587.694	-1.75548	0.593443	-2.95813	0.0030951	0.0100058
FBgn0286782	42.782	-1.75541	0.598153	-2.93472	0.00333848	0.0106823
FBgn0013811	720.8	-1.75359	0.632015	-2.7746	0.00552701	0.0163005
FBgn0030841	45.0558	-1.75332	0.623086	-2.81393	0.00489405	0.0147315
FBgn0285991	10109.7	-1.75329	0.21936	-7.99273	1.31988e-15	3.11343e-14
FBgn0039478	91.8458	-1.75262	0.293639	-5.96862	2.39266e-09	2.69415e-08
FBgn0051950	591.017	-1.75248	0.620332	-2.82507	0.00472697	0.0143121
FBgn0019650	381.251	-1.75007	0.421444	-4.15256	3.28784e-05	0.000180011
FBgn0036410	2419.83	-1.74919	0.375927	-4.65299	3.27157e-06	2.18029e-05
FBgn0261278	3463.05	-1.74904	0.295105	-5.92682	3.08857e-09	3.41192e-08
FBgn0039479	178.158	-1.74806	0.493218	-3.54419	0.000393824	0.00166067
FBgn0011592	1293.35	-1.74502	0.387209	-4.50666	6.58567e-06	4.13825e-05
FBgn0031632	791.515	-1.7446	0.398789	-4.37474	1.21579e-05	7.2141e-05
FBgn0034670	166.844	-1.74316	0.590828	-2.95036	0.00317401	0.0102187
FBgn0032848	804.619	-1.74182	0.277402	-6.27903	3.40694e-10	4.27763e-09
FBgn0052783	358.276	-1.7417	0.600848	-2.89874	0.00374668	0.0117798
FBgn0030183	106.924	-1.74145	0.344919	-5.04888	4.44416e-07	3.47405e-06
FBgn0029768	133.178	-1.74108	0.365618	-4.76202	1.91666e-06	1.33224e-05
FBgn0259742	882.711	-1.73877	0.277767	-6.25982	3.85415e-10	4.78985e-09
FBgn0036685	5513.1	-1.73854	0.260812	-6.66587	2.63102e-11	3.90439e-10
FBgn0025388	1029.12	-1.73782	0.554595	-3.1335	0.00172733	0.0060172
FBgn0033628	134.013	-1.7373	0.657734	-2.64134	0.00825792	0.0227742
FBgn0263864	353.544	-1.73497	0.393729	-4.4065	1.05056e-05	6.3118e-05
FBgn0026404	2911.7	-1.7345	0.471545	-3.67834	0.000234759	0.00104996
FBgn0083963	171.501	-1.72977	0.364668	-4.7434	2.10163e-06	1.45178e-05
FBgn0038826	8696.46	-1.72743	0.270289	-6.39103	1.64771e-10	2.16395e-09
FBgn0024836	1484.1	-1.7266	0.39792	-4.33908	1.43083e-05	8.368e-05
FBgn0040232	741.148	-1.72653	0.304261	-5.67448	1.39107e-08	1.39544e-07
FBgn0051374	122.604	-1.72614	0.292728	-5.89673	3.70778e-09	4.04601e-08
FBgn0032652	890.244	-1.72567	0.346492	-4.98039	6.34551e-07	4.8064e-06
FBgn0038488	2701.22	-1.72164	0.362031	-4.75551	1.97949e-06	1.37306e-05
FBgn0032405	586.742	-1.7211	0.258554	-6.65664	2.80158e-11	4.14128e-10
FBgn0038330	499.004	-1.71913	0.455887	-3.77096	0.000162623	0.000752666
FBgn0264478	13.7077	-1.71871	0.696206	-2.46869	0.013561	0.0343807
FBgn0002573	252.099	-1.71742	0.479038	-3.58514	0.000336904	0.00144563
FBgn0001086	1364.28	-1.7166	0.450798	-3.80792	0.000140139	0.000660675
FBgn0037710	2364.46	-1.71543	0.373479	-4.5931	4.36701e-06	2.84949e-05
FBgn0031498	982.562	-1.71486	0.376477	-4.55502	5.23794e-06	3.35992e-05
FBgn0038312	855.313	-1.71367	0.274872	-6.23441	4.53495e-10	5.57911e-09
FBgn0035311	134.877	-1.70946	0.454974	-3.75727	0.00017178	0.00079286
FBgn0037712	122.928	-1.70915	0.272899	-6.26295	3.77763e-10	4.70783e-09
FBgn0266981	18.032	-1.70835	0.611573	-2.79336	0.00521629	0.0155446
FBgn0001977	2430.74	-1.70648	0.219834	-7.76258	8.32163e-15	1.8191e-13
FBgn0263934	1755.27	-1.70456	0.323696	-5.26593	1.39478e-07	1.1917e-06
FBgn0050361	332.673	-1.7017	0.486362	-3.49885	0.000467277	0.00192729
FBgn0030230	328.018	-1.70164	0.313578	-5.42651	5.74654e-08	5.21149e-07
FBgn0051721	492.98	-1.69842	0.281616	-6.03099	1.62963e-09	1.8775e-08
FBgn0266457	31.254	-1.69543	0.557937	-3.03875	0.0023756	0.00795145
FBgn0030508	167.74	-1.693	0.317902	-5.32554	1.00654e-07	8.76219e-07
FBgn0001138	481.57	-1.69084	0.22228	-7.60677	2.81023e-14	5.91205e-13
FBgn0031575	930.385	-1.6897	0.449978	-3.75506	0.000173297	0.000799309
FBgn0262850	155.263	-1.68966	0.23848	-7.08512	1.38925e-12	2.40912e-11
FBgn0040207	2094.32	-1.68881	0.282763	-5.97253	2.33604e-09	2.63482e-08
FBgn0032350	4479.95	-1.68708	0.552877	-3.05145	0.00227736	0.00766852
FBgn0020257	2838.8	-1.68522	0.263511	-6.39527	1.60269e-10	2.10688e-09
FBgn0031608	712.139	-1.68424	0.199664	-8.43539	3.30097e-17	9.04197e-16
FBgn0015721	244.4	-1.68333	0.552236	-3.04821	0.00230209	0.00773822
FBgn0030010	311.677	-1.68325	0.522191	-3.22344	0.00126661	0.00457987
FBgn0038269	1829.41	-1.68268	0.268797	-6.26005	3.84846e-10	4.78721e-09
FBgn0036423	275.347	-1.68014	0.613266	-2.73965	0.00615044	0.0178296
FBgn0085468	307.749	-1.67764	0.658072	-2.54933	0.0107929	0.0284212
FBgn0004379	1281.01	-1.67281	0.408383	-4.09618	4.20028e-05	0.000223982
FBgn0263219	984.109	-1.67258	0.526865	-3.17459	0.00150048	0.00532509
FBgn0034655	506.446	-1.67145	0.31365	-5.32904	9.87339e-08	8.61083e-07
FBgn0262737	3073.88	-1.67145	0.237282	-7.04412	1.86633e-12	3.20331e-11
FBgn0005613	359.8	-1.6656	0.203103	-8.20073	2.38936e-16	6.01689e-15
FBgn0000504	472.952	-1.66546	0.247905	-6.71814	1.84055e-11	2.79455e-10
FBgn0000052	5139.23	-1.66404	0.396108	-4.20097	2.65769e-05	0.000147708
FBgn0052205	427.936	-1.65541	0.550913	-3.00484	0.00265721	0.00879533
FBgn0265102	480.304	-1.65498	0.520531	-3.1794	0.00147582	0.00525006
FBgn0036771	876.091	-1.65289	0.492499	-3.35612	0.000790435	0.00306536
FBgn0033654	1087.18	-1.6527	0.20904	-7.90613	2.65522e-15	6.08163e-14
FBgn0028400	1419.45	-1.65259	0.425488	-3.88399	0.000102757	0.000503361
FBgn0036850	298.18	-1.65044	0.495104	-3.33353	0.000857519	0.00329129
FBgn0035268	3150.96	-1.64941	0.382322	-4.3142	1.60179e-05	9.26289e-05
FBgn0051224	3102.29	-1.64749	0.316658	-5.20275	1.96362e-07	1.63092e-06
FBgn0267435	85.8583	-1.64571	0.314424	-5.23405	1.65832e-07	1.39899e-06
FBgn0051360	447.018	-1.64358	0.41535	-3.95709	7.58679e-05	0.00038053
FBgn0031052	3473.64	-1.64347	0.361663	-4.54421	5.51414e-06	3.5193e-05
FBgn0004647	2870.37	-1.64259	0.253425	-6.48157	9.07749e-11	1.23443e-09
FBgn0038165	459.028	-1.63961	0.442668	-3.70392	0.000212292	0.000960036
FBgn0031730	95.2213	-1.63716	0.353876	-4.62638	3.72115e-06	2.4507e-05
FBgn0031254	49.0284	-1.63673	0.394155	-4.15251	3.28854e-05	0.000180011
FBgn0266282	829.633	-1.63584	0.448945	-3.64374	0.000268709	0.00118249
FBgn0040759	1640.24	-1.6349	0.402983	-4.05701	4.97059e-05	0.000259795
FBgn0024542	1210.59	-1.63301	0.475668	-3.4331	0.000596726	0.00239798
FBgn0262108	475.09	-1.62936	0.236623	-6.88588	5.74328e-12	9.32119e-11
FBgn0034217	176.395	-1.62839	0.589216	-2.76366	0.00571574	0.016776
FBgn0036516	5168.16	-1.62504	0.23761	-6.83908	7.97013e-12	1.26898e-10
FBgn0053207	402.348	-1.62487	0.401307	-4.04894	5.14493e-05	0.000268293
FBgn0032651	334.965	-1.62143	0.631701	-2.56678	0.0102649	0.0272679
FBgn0051361	1592.35	-1.62028	0.160517	-10.0941	5.86402e-24	2.89364e-22
FBgn0283432	798.221	-1.61945	0.355077	-4.56085	5.09469e-06	3.27495e-05
FBgn0033301	306.106	-1.61914	0.681247	-2.37673	0.017467	0.0423564
FBgn0032883	1723.81	-1.61508	0.479369	-3.36918	0.00075391	0.00294393
FBgn0052786	331.043	-1.61432	0.589129	-2.74019	0.00614041	0.0178159
FBgn0027620	1199.81	-1.61193	0.282474	-5.70646	1.15352e-08	1.1747e-07
FBgn0260399	636.562	-1.60992	0.498023	-3.23263	0.00122658	0.00445433
FBgn0264495	4444.46	-1.60978	0.313574	-5.13366	2.84166e-07	2.29211e-06
FBgn0013433	120.044	-1.60971	0.654045	-2.46116	0.013849	0.0349833
FBgn0031001	274.959	-1.60938	0.359999	-4.47051	7.80349e-06	4.82443e-05
FBgn0035676	71.0072	-1.60921	0.624737	-2.57582	0.0100004	0.026722
FBgn0035267	914.582	-1.60896	0.239826	-6.70888	1.96131e-11	2.95782e-10
FBgn0029799	45.5334	-1.60492	0.555539	-2.88893	0.00386553	0.0120883
FBgn0029114	1484.36	-1.6048	0.287225	-5.58726	2.30686e-08	2.23395e-07
FBgn0265156	26.437	-1.60385	0.603619	-2.65706	0.00788255	0.0219228
FBgn0039396	63.2023	-1.6036	0.337417	-4.75259	2.00832e-06	1.39162e-05
FBgn0038958	19.8567	-1.60327	0.664803	-2.41164	0.0158808	0.0391391
FBgn0262719	1802.54	-1.60126	0.198696	-8.05886	7.701e-16	1.85904e-14
FBgn0038818	1157.87	-1.60108	0.423182	-3.78343	0.00015468	0.000720621
FBgn0015550	173.337	-1.60043	0.673349	-2.37682	0.0174625	0.042353
FBgn0004644	536.942	-1.59796	0.48991	-3.26173	0.00110733	0.0040951
FBgn0036536	268.637	-1.59244	0.55024	-2.89409	0.00380261	0.0119193
FBgn0051105	42.4995	-1.59021	0.568158	-2.79888	0.00512802	0.0153258
FBgn0000568	6361.33	-1.58997	0.530791	-2.99547	0.00274026	0.00901906
FBgn0034729	295.994	-1.58124	0.27279	-5.79655	6.76938e-09	7.12617e-08
FBgn0086655	2148.31	-1.58013	0.169193	-9.33918	9.7083e-21	3.64999e-19
FBgn0050476	199.355	-1.57784	0.405427	-3.8918	9.95038e-05	0.000488314
FBgn0033638	6086.42	-1.57594	0.301254	-5.23126	1.68362e-07	1.41677e-06
FBgn0031872	2365.99	-1.575	0.291789	-5.39772	6.74947e-08	6.05963e-07
FBgn0083123	33.8444	-1.57451	0.511078	-3.08076	0.00206471	0.00704795
FBgn0030768	1382.11	-1.57357	0.31776	-4.95207	7.34264e-07	5.50882e-06
FBgn0039003	1238.81	-1.5716	0.455703	-3.44874	0.000563203	0.00228378
FBgn0283433	985.886	-1.57114	0.294016	-5.34374	9.10504e-08	7.98223e-07
FBgn0261963	351.75	-1.5706	0.418783	-3.75039	0.000176558	0.000813231
FBgn0284084	390.587	-1.57003	0.237895	-6.59966	4.12098e-11	5.92838e-10
FBgn0052206	175.166	-1.5677	0.283437	-5.53102	3.1837e-08	3.01139e-07
FBgn0259162	26.8791	-1.56268	0.498532	-3.13456	0.00172111	0.00599707
FBgn0031403	421.618	-1.56264	0.3769	-4.14604	3.38277e-05	0.000184717
FBgn0000529	39.4316	-1.56239	0.652405	-2.39482	0.0166287	0.0406473
FBgn0015625	1433.8	-1.56188	0.316193	-4.93964	7.82656e-07	5.8425e-06
FBgn0039128	200.695	-1.56068	0.540903	-2.88533	0.00391004	0.0122076
FBgn0002023	501.631	-1.56058	0.538713	-2.89687	0.00376905	0.0118362
FBgn0043001	490.846	-1.56048	0.283311	-5.50802	3.62898e-08	3.40343e-07
FBgn0000625	482.382	-1.56018	0.254147	-6.13887	8.31107e-10	9.90686e-09
FBgn0011206	3862.4	-1.55867	0.306662	-5.08269	3.72118e-07	2.94317e-06
FBgn0036897	1298.22	-1.55668	0.439417	-3.54261	0.000396193	0.00166961
FBgn0020412	3108.5	-1.55617	0.166594	-9.34111	9.5327e-21	3.60417e-19
FBgn0011674	631.101	-1.5561	0.381963	-4.07395	4.62227e-05	0.000243964
FBgn0004839	696.597	-1.55559	0.314002	-4.95409	7.26709e-07	5.45519e-06
FBgn0035643	52.0683	-1.555	0.500147	-3.1091	0.0018766	0.00647501
FBgn0034085	1972.49	-1.55068	0.330178	-4.69649	2.6467e-06	1.80508e-05
FBgn0041097	447.857	-1.54875	0.46435	-3.3353	0.000852084	0.00327323
FBgn0004832	699.375	-1.54871	0.41832	-3.70222	0.000213723	0.00096618
FBgn0261238	2427.34	-1.54726	0.133511	-11.589	4.68339e-31	4.10852e-29
FBgn0033031	441.284	-1.54479	0.461844	-3.34483	0.000823326	0.00317822
FBgn0036899	303.431	-1.54472	0.361774	-4.26984	1.9561e-05	0.000111722
FBgn0036264	3246.39	-1.54438	0.647554	-2.38494	0.017082	0.0415427
FBgn0250754	2896.68	-1.54169	0.249985	-6.16711	6.95494e-10	8.36462e-09
FBgn0261588	876.314	-1.53671	0.423144	-3.63165	0.000281614	0.00123362
FBgn0267253	387.184	-1.53571	0.649393	-2.36484	0.018038	0.0434974
FBgn0031970	53.257	-1.53525	0.325273	-4.71988	2.35985e-06	1.62098e-05
FBgn0052554	166.832	-1.53355	0.517167	-2.96529	0.00302399	0.00982284
FBgn0085430	2422.52	-1.53335	0.262381	-5.84398	5.09666e-09	5.48136e-08
FBgn0039492	5609.64	-1.53055	0.318086	-4.81173	1.49627e-06	1.06202e-05
FBgn0264571	34.812	-1.52826	0.521896	-2.92829	0.00340835	0.0108714
FBgn0033785	749.362	-1.52537	0.572804	-2.66298	0.00774512	0.0216168
FBgn0036196	2265.71	-1.5227	0.308799	-4.93102	8.17995e-07	6.08936e-06
FBgn0052823	802.521	-1.5211	0.372811	-4.08007	4.50225e-05	0.000238098
FBgn0033177	2786.69	-1.52065	0.341841	-4.4484	8.6511e-06	5.30206e-05
FBgn0025186	1619.99	-1.51981	0.271665	-5.59443	2.2135e-08	2.15131e-07
FBgn0031516	822.225	-1.51779	0.290542	-5.22399	1.75108e-07	1.46802e-06
FBgn0036502	1194.23	-1.51614	0.353385	-4.29033	1.78409e-05	0.000102493
FBgn0035164	1574.94	-1.51449	0.510143	-2.96876	0.00299001	0.00972658
FBgn0032877	368.563	-1.5135	0.584562	-2.58912	0.00962206	0.0259176
FBgn0031535	1701.67	-1.50875	0.575997	-2.61936	0.00880939	0.0240912
FBgn0085397	717.811	-1.50645	0.305676	-4.92827	8.29612e-07	6.16218e-06
FBgn0039294	120.546	-1.50566	0.604767	-2.48965	0.012787	0.0327845
FBgn0003997	499.57	-1.50249	0.552344	-2.72022	0.0065239	0.0187482
FBgn0027788	94.4845	-1.50205	0.531662	-2.8252	0.00472507	0.0143095
FBgn0260766	32.1154	-1.50128	0.599783	-2.50304	0.012313	0.0317574
FBgn0010313	2691.47	-1.49907	0.294881	-5.08366	3.70222e-07	2.93271e-06
FBgn0266111	847.679	-1.49747	0.621952	-2.4077	0.0160534	0.039492
FBgn0036259	48.3649	-1.49709	0.388608	-3.85245	0.00011694	0.000564493
FBgn0030274	2504.5	-1.49686	0.258582	-5.78871	7.09271e-09	7.40843e-08
FBgn0027589	98.5871	-1.49461	0.429149	-3.48273	0.000496334	0.002036
FBgn0037811	650.907	-1.49317	0.4379	-3.40984	0.000650006	0.00258577
FBgn0035036	1026.31	-1.49131	0.37615	-3.96468	7.34948e-05	0.000369872
FBgn0051344	825.652	-1.4871	0.209215	-7.10801	1.17731e-12	2.06561e-11
FBgn0287864	659.347	-1.48688	0.261407	-5.68799	1.2854e-08	1.30013e-07
FBgn0262613	248.275	-1.48564	0.438837	-3.38539	0.000710763	0.00279515
FBgn0033884	861.934	-1.48227	0.451735	-3.28128	0.00103337	0.0038581
FBgn0267507	130.819	-1.48195	0.281005	-5.27375	1.33666e-07	1.14637e-06
FBgn0287218	128.611	-1.4814	0.513463	-2.88512	0.0039127	0.0122131
FBgn0000357	25.4758	-1.48079	0.581415	-2.54687	0.0108693	0.0285831
FBgn0031894	249.608	-1.47876	0.358883	-4.12046	3.78113e-05	0.000203653
FBgn0263835	39.9403	-1.476	0.383869	-3.84506	0.000120521	0.000578552
FBgn0004876	3147.99	-1.47559	0.28103	-5.25064	1.51569e-07	1.28676e-06
FBgn0001269	1141.97	-1.47256	0.192431	-7.65241	1.97253e-14	4.20912e-13
FBgn0023531	607.684	-1.47204	0.313449	-4.69628	2.64942e-06	1.80602e-05
FBgn0029003	2401.29	-1.47179	0.312132	-4.71528	2.41379e-06	1.65549e-05
FBgn0267428	2488.86	-1.46948	0.287023	-5.11973	3.05968e-07	2.4503e-06
FBgn0286809	1673.19	-1.46947	0.527184	-2.78739	0.0053134	0.015785
FBgn0037618	57.7511	-1.46917	0.358427	-4.09895	4.15032e-05	0.000221758
FBgn0032515	2076.42	-1.46598	0.198741	-7.37631	1.62738e-13	3.13832e-12
FBgn0032891	157.923	-1.4626	0.491572	-2.97535	0.00292659	0.00953645
FBgn0264089	2536.63	-1.46148	0.233343	-6.26321	3.77122e-10	4.70421e-09
FBgn0010407	209.298	-1.45834	0.451476	-3.23017	0.00123719	0.00448797
FBgn0026371	754.695	-1.45791	0.219328	-6.64715	2.98823e-11	4.38339e-10
FBgn0036849	30.6502	-1.45763	0.567913	-2.56665	0.0102687	0.0272708
FBgn0038739	934.177	-1.45753	0.506476	-2.87778	0.00400479	0.0124715
FBgn0261710	11008.6	-1.45708	0.329517	-4.42188	9.78471e-06	5.91845e-05
FBgn0030421	166.74	-1.45591	0.41265	-3.52821	0.000418385	0.00174885
FBgn0043792	555.582	-1.44977	0.298045	-4.86426	1.14885e-06	8.32606e-06
FBgn0032117	1379.57	-1.44941	0.36933	-3.92442	8.69385e-05	0.000430904
FBgn0259246	892.504	-1.44925	0.337255	-4.29719	1.72974e-05	9.95565e-05
FBgn0034689	1753.53	-1.44834	0.44668	-3.24247	0.001185	0.00432792
FBgn0010197	27.3368	-1.44785	0.432058	-3.35105	0.000805048	0.00311573
FBgn0039141	1684.48	-1.44738	0.320914	-4.51019	6.47687e-06	4.07369e-05
FBgn0266099	46.8194	-1.44734	0.537151	-2.69447	0.00705004	0.019997
FBgn0030555	873.721	-1.44732	0.396198	-3.65303	0.000259161	0.00114649
FBgn0033058	130.375	-1.44644	0.288875	-5.00715	5.52411e-07	4.23925e-06
FBgn0262851	161.999	-1.44258	0.244646	-5.89659	3.71083e-09	4.04604e-08
FBgn0035264	353.013	-1.44181	0.365616	-3.94351	8.02977e-05	0.000400802
FBgn0003068	103.958	-1.44029	0.48566	-2.96564	0.00302059	0.00981416
FBgn0038180	1426.75	-1.43982	0.605366	-2.37843	0.0173866	0.0421995
FBgn0026239	3509.88	-1.43979	0.178968	-8.04496	8.62763e-16	2.06786e-14
FBgn0034264	473.943	-1.43859	0.287099	-5.0108	5.42047e-07	4.16926e-06
FBgn0036155	728.46	-1.43757	0.459605	-3.12784	0.00176096	0.00611845
FBgn0036062	164.46	-1.43641	0.567771	-2.52992	0.011409	0.0297859
FBgn0013717	1346.84	-1.43602	0.285061	-5.03757	4.71473e-07	3.6621e-06
FBgn0024732	297.197	-1.43388	0.314068	-4.56551	4.9829e-06	3.21386e-05
FBgn0264816	569.954	-1.43269	0.560423	-2.55645	0.0105746	0.027923
FBgn0010382	782.712	-1.4324	0.211829	-6.76203	1.36072e-11	2.09685e-10
FBgn0267001	1489.53	-1.4323	0.489818	-2.92414	0.0034541	0.0110017
FBgn0034430	1318.77	-1.43146	0.553371	-2.5868	0.00968724	0.0260253
FBgn0039848	78.0936	-1.42988	0.520949	-2.74475	0.00605566	0.0176005
FBgn0000524	1510.41	-1.42944	0.187722	-7.61466	2.64392e-14	5.57091e-13
FBgn0265691	44.1265	-1.42912	0.509379	-2.80561	0.0050222	0.0150498
FBgn0020513	8918.51	-1.42812	0.300063	-4.75941	1.9416e-06	1.34887e-05
FBgn0000351	64.2819	-1.42711	0.32795	-4.35162	1.35138e-05	7.96237e-05
FBgn0038110	1406.94	-1.42641	0.160045	-8.9126	4.98511e-19	1.58555e-17
FBgn0005616	1569.22	-1.42632	0.55099	-2.58865	0.0096354	0.0259275
FBgn0030673	380.103	-1.42558	0.278271	-5.12298	3.00749e-07	2.41138e-06
FBgn0036180	3245.98	-1.4241	0.367493	-3.87518	0.000106544	0.000519447
FBgn0038874	1076.09	-1.42354	0.396987	-3.58585	0.00033598	0.00144258
FBgn0011725	5985.48	-1.42247	0.139676	-10.1841	2.33527e-24	1.20554e-22
FBgn0000542	2720.03	-1.42144	0.259529	-5.477	4.32594e-08	4.01263e-07
FBgn0038221	71.2344	-1.42091	0.4448	-3.19449	0.0014008	0.00500439
FBgn0052100	695.996	-1.42082	0.304816	-4.66124	3.14307e-06	2.10511e-05
FBgn0032517	639.377	-1.41987	0.405139	-3.50465	0.000457199	0.00189049
FBgn0035986	1035.81	-1.41466	0.34752	-4.07073	4.68665e-05	0.000246877
FBgn0040388	1131.31	-1.41366	0.161533	-8.75151	2.10511e-18	6.37804e-17
FBgn0263392	2744.81	-1.41355	0.350381	-4.03432	5.476e-05	0.000284439
FBgn0033806	539.439	-1.41339	0.381532	-3.70451	0.000211797	0.000958763
FBgn0026160	3521.19	-1.40964	0.386902	-3.6434	0.000269055	0.00118324
FBgn0040528	58.4364	-1.4096	0.379615	-3.71324	0.000204623	0.000929424
FBgn0035151	485.747	-1.4096	0.581233	-2.42519	0.0153006	0.0379461
FBgn0004885	4886.05	-1.40878	0.206475	-6.82302	8.91449e-12	1.41264e-10
FBgn0000404	2295.71	-1.40686	0.347762	-4.04547	5.22179e-05	0.000271971
FBgn0031848	185.067	-1.40632	0.575721	-2.44272	0.0145772	0.0364959
FBgn0036761	2809.46	-1.4057	0.162097	-8.67198	4.24672e-18	1.25274e-16
FBgn0000576	569.353	-1.4043	0.306501	-4.58172	4.61173e-06	2.99606e-05
FBgn0035692	3237.03	-1.40245	0.292853	-4.78892	1.67679e-06	1.18017e-05
FBgn0023528	1815.81	-1.4005	0.375146	-3.73322	0.000189049	0.000865128
FBgn0004367	533.424	-1.39908	0.296465	-4.71921	2.36767e-06	1.62469e-05
FBgn0014427	2405.26	-1.39832	0.593891	-2.35451	0.0185474	0.044462
FBgn0010309	704.062	-1.3976	0.535287	-2.61093	0.00902976	0.0245942
FBgn0052944	410.953	-1.39623	0.365931	-3.81556	0.000135877	0.000642615
FBgn0038053	2674.06	-1.39595	0.237554	-5.87637	4.19372e-09	4.54303e-08
FBgn0053126	757.652	-1.39583	0.527751	-2.64487	0.00817216	0.022593
FBgn0032741	630.087	-1.39348	0.372174	-3.74415	0.000181004	0.000831428
FBgn0261397	2245.75	-1.39285	0.455658	-3.05678	0.00223731	0.00755071
FBgn0037656	578.214	-1.39134	0.521086	-2.67008	0.00758323	0.0212622
FBgn0033636	4247.33	-1.38916	0.166155	-8.3606	6.24002e-17	1.65521e-15
FBgn0033738	2896.88	-1.389	0.404269	-3.43582	0.000590755	0.00237612
FBgn0016660	292.992	-1.38766	0.238288	-5.82346	5.76419e-09	6.15489e-08
FBgn0037482	1865.26	-1.3875	0.364568	-3.80588	0.000141302	0.000665456
FBgn0015609	697.305	-1.38545	0.239146	-5.79332	6.90077e-09	7.24177e-08
FBgn0035483	949.212	-1.38367	0.379209	-3.64884	0.000263429	0.00116269
FBgn0025382	320.849	-1.38367	0.353415	-3.91512	9.03576e-05	0.000446532
FBgn0040031	146.156	-1.38297	0.371745	-3.72023	0.000199045	0.000906851
FBgn0030905	145.805	-1.37436	0.439662	-3.12595	0.00177229	0.00615172
FBgn0038686	2499.99	-1.37325	0.224093	-6.12803	8.89725e-10	1.05868e-08
FBgn0004197	1768.22	-1.37276	0.200474	-6.84757	7.51167e-12	1.19883e-10
FBgn0026190	1177.12	-1.37042	0.555874	-2.46534	0.0136884	0.0346455
FBgn0085384	694.011	-1.3688	0.181678	-7.53419	4.91358e-14	1.00381e-12
FBgn0262733	903.606	-1.36684	0.360964	-3.78665	0.000152694	0.000713848
FBgn0259146	145.419	-1.36555	0.378329	-3.60942	0.000306877	0.001331
FBgn0266418	2269.4	-1.36446	0.302075	-4.51695	6.2736e-06	3.95883e-05
FBgn0265631	27.576	-1.36425	0.5239	-2.60403	0.00921354	0.025013
FBgn0053147	344.107	-1.36322	0.375945	-3.62611	0.000287719	0.00125709
FBgn0010473	941.839	-1.36034	0.231061	-5.88738	3.92374e-09	4.26433e-08
FBgn0035477	162.436	-1.35834	0.510926	-2.65858	0.00784701	0.0218376
FBgn0004811	1590.58	-1.35767	0.144548	-9.39247	5.8608e-21	2.30685e-19
FBgn0035449	2255.58	-1.35272	0.477299	-2.83412	0.00459525	0.0139922
FBgn0026361	339.754	-1.34939	0.519229	-2.59883	0.00935416	0.0253486
FBgn0037472	1415.31	-1.34916	0.249843	-5.40004	6.66276e-08	5.98578e-07
FBgn0037623	2381.16	-1.3488	0.309198	-4.36227	1.28718e-05	7.61082e-05
FBgn0083950	153.057	-1.3488	0.427833	-3.15263	0.00161809	0.00567939
FBgn0053087	3527.65	-1.34843	0.365916	-3.68507	0.000228638	0.00102498
FBgn0030806	572.361	-1.34699	0.359952	-3.74212	0.000182473	0.000837319
FBgn0030466	1158.1	-1.34614	0.179884	-7.48339	7.24282e-14	1.44233e-12
FBgn0052758	2208.8	-1.34572	0.331472	-4.05983	4.91091e-05	0.000256876
FBgn0032248	1316.98	-1.34545	0.454372	-2.96113	0.00306514	0.00993728
FBgn0003002	309.406	-1.34543	0.289935	-4.64045	3.47653e-06	2.30543e-05
FBgn0287185	168.56	-1.34513	0.290212	-4.635	3.56934e-06	2.36348e-05
FBgn0051072	3793.25	-1.34342	0.408712	-3.28696	0.00101277	0.0037928
FBgn0030266	4027	-1.34259	0.34574	-3.88324	0.000103072	0.000504718
FBgn0038476	4028.44	-1.34086	0.214759	-6.24355	4.27749e-10	5.2866e-09
FBgn0259823	265.217	-1.34029	0.503533	-2.66177	0.00777304	0.0216631
FBgn0032330	2182.25	-1.33831	0.286247	-4.67538	2.93409e-06	1.98135e-05
FBgn0043362	1764.35	-1.33706	0.43932	-3.04348	0.00233861	0.00784721
FBgn0287844	136.096	-1.3369	0.410166	-3.25941	0.00111645	0.0041179
FBgn0035907	898.969	-1.33681	0.317239	-4.21388	2.51017e-05	0.000140265
FBgn0032487	591.448	-1.33606	0.408797	-3.26826	0.00108209	0.00401433
FBgn0037107	124.009	-1.33461	0.455679	-2.92883	0.00340236	0.0108575
FBgn0283503	1785.11	-1.33459	0.375467	-3.55449	0.00037872	0.00160403
FBgn0038596	62.6807	-1.33363	0.400058	-3.3336	0.0008573	0.00329129
FBgn0039403	276.261	-1.33159	0.532115	-2.50245	0.0123337	0.0317986
FBgn0038767	455.06	-1.33119	0.333571	-3.99072	6.58724e-05	0.000335537
FBgn0037941	192.338	-1.33082	0.447239	-2.97565	0.0029237	0.00952937
FBgn0259231	30.7522	-1.33074	0.400717	-3.3209	0.00089729	0.0034224
FBgn0037370	4964.33	-1.33064	0.206993	-6.4284	1.28954e-10	1.72189e-09
FBgn0026085	215.853	-1.33042	0.437987	-3.03757	0.0023849	0.00797463
FBgn0004066	9056.96	-1.33024	0.194578	-6.8365	8.11486e-12	1.28897e-10
FBgn0035254	425.779	-1.32761	0.563848	-2.35455	0.0185452	0.044462
FBgn0028582	7723.85	-1.32732	0.404318	-3.28285	0.00102764	0.00383992
FBgn0030571	672.113	-1.32612	0.237745	-5.57792	2.43415e-08	2.35044e-07
FBgn0003124	3326.83	-1.32536	0.282439	-4.69256	2.69807e-06	1.83546e-05
FBgn0028572	1552.69	-1.32496	0.346125	-3.82799	0.000129192	0.000614899
FBgn0036179	81.6816	-1.32424	0.313573	-4.22305	2.41018e-05	0.000135138
FBgn0000140	1306.48	-1.32377	0.304242	-4.35104	1.35496e-05	7.97991e-05
FBgn0039354	47.7449	-1.32368	0.376511	-3.51565	0.000438676	0.00182571
FBgn0052432	126.531	-1.321	0.398826	-3.31222	0.000925589	0.00351355
FBgn0023526	1498.7	-1.32096	0.390425	-3.38338	0.000715995	0.00281243
FBgn0031979	391.307	-1.31895	0.340063	-3.87855	0.000105082	0.000513438
FBgn0002948	231.109	-1.3173	0.493575	-2.6689	0.00761001	0.0212972
FBgn0051125	352.537	-1.31681	0.527523	-2.4962	0.0125531	0.0322834
FBgn0027521	399.956	-1.3158	0.484693	-2.71471	0.00663345	0.0190122
FBgn0041337	239.823	-1.31538	0.5696	-2.30931	0.0209263	0.0491722
FBgn0036052	1208.81	-1.31295	0.29401	-4.46568	7.98143e-06	4.92744e-05
FBgn0035574	2814.3	-1.31193	0.342796	-3.82715	0.000129634	0.000616345
FBgn0261396	9083.38	-1.31173	0.125569	-10.4463	1.52376e-25	8.52162e-24
FBgn0041171	4393.04	-1.31061	0.199637	-6.56494	5.20536e-11	7.35435e-10
FBgn0013469	509.238	-1.30957	0.211122	-6.20292	5.54254e-10	6.71408e-09
FBgn0037323	163.424	-1.30803	0.413404	-3.16406	0.00155583	0.0054867
FBgn0040376	48.2739	-1.30759	0.444083	-2.94447	0.00323503	0.0103977
FBgn0029813	62.005	-1.30727	0.525733	-2.48656	0.0128987	0.0330141
FBgn0037377	1021.39	-1.30687	0.391867	-3.33499	0.000853037	0.00327596
FBgn0034599	635.14	-1.30631	0.369417	-3.53614	0.000406023	0.00170605
FBgn0263005	652.043	-1.30555	0.215481	-6.05878	1.37157e-09	1.59387e-08
FBgn0035956	188.939	-1.30511	0.327286	-3.98766	6.67296e-05	0.000339516
FBgn0037734	1987.02	-1.30414	0.267358	-4.87786	1.07244e-06	7.82359e-06
FBgn0266801	886.283	-1.30402	0.225402	-5.7853	7.23815e-09	7.54274e-08
FBgn0031745	308.181	-1.30298	0.422654	-3.08286	0.0020502	0.00700733
FBgn0283649	983.877	-1.3029	0.296167	-4.39923	1.08638e-05	6.50663e-05
FBgn0267351	2063.48	-1.3025	0.419961	-3.10149	0.00192549	0.00662496
FBgn0032921	468.946	-1.30217	0.394536	-3.3005	0.000965128	0.00363671
FBgn0036354	1980.69	-1.30202	0.349044	-3.73026	0.000191286	0.000874469
FBgn0086917	277.831	-1.30098	0.502639	-2.5883	0.00964515	0.0259363
FBgn0028692	17132.8	-1.29855	0.163072	-7.96306	1.67833e-15	3.92449e-14
FBgn0003701	434.76	-1.29465	0.510207	-2.5375	0.0111646	0.0292508
FBgn0035194	410.347	-1.29336	0.19292	-6.70411	2.02634e-11	3.04906e-10
FBgn0001085	843.377	-1.2927	0.297699	-4.34231	1.4099e-05	8.25281e-05
FBgn0003090	2076.75	-1.29122	0.171873	-7.51264	5.79487e-14	1.17137e-12
FBgn0030813	197.033	-1.2907	0.402452	-3.2071	0.00134078	0.0048182
FBgn0036036	322.878	-1.29061	0.40282	-3.20394	0.0013556	0.00486365
FBgn0265630	2039.81	-1.29022	0.49727	-2.5946	0.00947001	0.0255902
FBgn0085400	765.994	-1.28845	0.178765	-7.20749	5.69915e-13	1.0337e-11
FBgn0052756	616.224	-1.28758	0.4987	-2.58188	0.00982633	0.0263199
FBgn0038672	530.861	-1.28648	0.334213	-3.84929	0.000118459	0.000571104
FBgn0030955	8354.78	-1.28423	0.302212	-4.24945	2.14297e-05	0.000121568
FBgn0052380	1883.97	-1.2826	0.256392	-5.00248	5.65962e-07	4.33334e-06
FBgn0051957	346.226	-1.28188	0.418493	-3.06308	0.00219073	0.00741963
FBgn0260755	1204.69	-1.28119	0.422967	-3.02905	0.00245325	0.00818687
FBgn0030701	2469.64	-1.28017	0.171882	-7.448	9.47689e-14	1.85963e-12
FBgn0036364	2897.99	-1.27957	0.392879	-3.25691	0.00112631	0.00414515
FBgn0030241	2449.74	-1.27847	0.234801	-5.44489	5.18368e-08	4.75241e-07
FBgn0037592	2823.11	-1.27787	0.182793	-6.99083	2.73262e-12	4.56752e-11
FBgn0030710	313.979	-1.27479	0.251555	-5.06762	4.02824e-07	3.17668e-06
FBgn0020307	850.175	-1.27203	0.234806	-5.41734	6.04933e-08	5.46761e-07
FBgn0000119	2889.06	-1.27161	0.216034	-5.88615	3.95304e-09	4.29269e-08
FBgn0033627	605.455	-1.26833	0.306113	-4.14332	3.42307e-05	0.000186614
FBgn0038722	1480.97	-1.26758	0.509091	-2.48988	0.0127786	0.0327749
FBgn0261112	1715.56	-1.26671	0.388689	-3.25894	0.00111831	0.00412125
FBgn0033925	1307.52	-1.26589	0.260183	-4.86539	1.14232e-06	8.29215e-06
FBgn0261268	4347.01	-1.26511	0.242792	-5.21067	1.88157e-07	1.56568e-06
FBgn0037613	507.189	-1.26353	0.472504	-2.67411	0.0074928	0.0210466
FBgn0003204	7036.56	-1.26297	0.17531	-7.20422	5.83775e-13	1.05315e-11
[truncated: 3,732 more rows]

## Sheet: S5b_Diff Exp genes in Female_L3
Gene	baseMean	log2FoldChange	lfcSE	stat	pvalue	padj
FBgn0038509	2227.49	-14.4383	1.25165	-11.5354	8.74687e-31	1.64954e-28
FBgn0262023	1500.7	-13.8686	1.24958	-11.0986	1.2738e-28	2.11104e-26
FBgn0085325	1030.11	-10.9143	0.918623	-11.8812	1.48226e-32	3.15136e-30
FBgn0034428	157.827	-10.619	1.37287	-7.73483	1.03538e-14	3.68891e-13
FBgn0030629	130.653	-10.3468	1.24398	-8.31755	8.9799e-17	4.12698e-15
FBgn0032066	124.97	-10.2822	1.24937	-8.22995	1.87284e-16	8.3273e-15
FBgn0262024	70.067	-9.44802	1.36677	-6.91265	4.75694e-12	1.19338e-10
FBgn0050375	50.8745	-8.98553	1.39182	-6.45597	1.07528e-10	2.27935e-09
FBgn0051741	89.6079	-8.83894	1.36187	-6.4903	8.56658e-11	1.84451e-09
FBgn0039592	43.8021	-8.76995	1.39904	-6.26857	3.64388e-10	7.02941e-09
FBgn0033999	270.179	-8.57946	0.88445	-9.70033	3.00512e-22	2.38188e-20
FBgn0000639	340434	-8.54397	1.33129	-6.41783	1.38235e-10	2.84748e-09
FBgn0004594	37.0511	-8.52846	1.35565	-6.29103	3.15371e-10	6.14888e-09
FBgn0050042	37.0364	-8.52787	1.33046	-6.40972	1.45787e-10	2.99178e-09
FBgn0003375	103486	-8.14535	1.31749	-6.18248	6.31028e-10	1.17185e-08
FBgn0003378	35983.7	-8.10973	1.80742	-4.48691	7.22648e-06	6.00177e-05
FBgn0029770	112.318	-8.0947	1.80726	-4.47899	7.49977e-06	6.20049e-05
FBgn0265835	27.3544	-8.0896	1.42692	-5.66926	1.43414e-08	2.08877e-07
FBgn0037677	337.757	-8.07065	0.795351	-10.1473	3.40694e-24	3.2978e-22
FBgn0031747	7654.61	-7.90262	1.09006	-7.24973	4.17612e-13	1.25146e-11
FBgn0038523	9535.86	-7.88261	2.25628	-3.49363	0.000476496	0.00241404
FBgn0034906	20.0705	-7.64464	1.56573	-4.88249	1.04753e-06	1.06289e-05
FBgn0052821	36.2254	-7.52452	1.36486	-5.51304	3.5269e-08	4.85248e-07
FBgn0033137	1413.47	-7.41154	1.1084	-6.68673	2.2822e-11	5.24427e-10
FBgn0259949	16.7278	-7.38147	1.48735	-4.96283	6.94734e-07	7.35624e-06
FBgn0263388	16.6511	-7.37461	1.46715	-5.02648	4.99577e-07	5.46438e-06
FBgn0262874	14.5821	-7.18259	1.5387	-4.66796	3.04209e-06	2.76595e-05
FBgn0263246	96.5369	-7.17013	0.900401	-7.96326	1.67563e-15	6.78816e-14
FBgn0052301	13.5538	-7.07712	1.62789	-4.34743	1.37741e-05	0.000106701
FBgn0035647	12.922	-7.00901	1.55868	-4.49676	6.89955e-06	5.75208e-05
FBgn0036606	124.974	-6.98028	0.783967	-8.9038	5.39685e-19	3.27949e-17
FBgn0085309	24.4979	-6.96284	1.37335	-5.06996	3.9789e-07	4.42288e-06
FBgn0033936	1064.88	-6.9538	0.662336	-10.4989	8.73821e-26	1.05031e-23
FBgn0263597	12.4242	-6.95144	1.66308	-4.17986	2.91692e-05	0.000208941
FBgn0038921	12.0387	-6.90916	1.97328	-3.50136	0.000462886	0.0023582
FBgn0261932	433.927	-6.88931	0.476228	-14.4664	1.97484e-47	1.35005e-44
FBgn0031288	22.476	-6.83738	1.39526	-4.90042	9.56326e-07	9.83111e-06
FBgn0085308	3119.66	-6.77963	2.63339	-2.57449	0.0100389	0.0317909
FBgn0051139	10.5166	-6.71373	1.67645	-4.00474	6.20868e-05	0.000403269
FBgn0029751	10.395	-6.69737	1.72378	-3.88528	0.000102211	0.000628936
FBgn0003377	85604.3	-6.67954	2.1409	-3.11997	0.00180872	0.00751951
FBgn0032839	10.2668	-6.67627	1.97388	-3.38231	0.000718786	0.00342723
FBgn0286723	2625.63	-6.64949	0.52933	-12.5621	3.41165e-36	9.56838e-34
FBgn0034710	19.4122	-6.61658	1.44692	-4.57288	4.81062e-06	4.14646e-05
FBgn0039196	9.80998	-6.60991	1.67446	-3.94747	7.89798e-05	0.000500801
FBgn0032519	9.70305	-6.59735	1.70941	-3.85942	0.000113655	0.000686827
FBgn0261998	9.3352	-6.54135	1.68664	-3.87832	0.00010518	0.000643432
FBgn0052459	9.24714	-6.52811	2.26048	-2.88793	0.00387788	0.0143686
FBgn0286892	9.02127	-6.49013	1.71864	-3.77633	0.000159159	0.000920612
FBgn0024294	659.115	-6.48394	0.562784	-11.5212	1.03197e-30	1.88129e-28
FBgn0032003	8.39072	-6.38785	2.236	-2.85682	0.0042791	0.0154931
FBgn0267196	8.30953	-6.37137	1.75835	-3.62348	0.000290661	0.00157466
FBgn0267794	26.5937	-6.36578	1.54541	-4.11914	3.80283e-05	0.000263763
FBgn0034426	8.27838	-6.36441	1.84675	-3.44627	0.000568374	0.00280166
FBgn0259950	3760.24	-6.33881	2.23432	-2.83702	0.00455363	0.016309
FBgn0046253	351.035	-6.25613	0.501776	-12.468	1.11635e-35	2.90731e-33
FBgn0266302	7.61098	-6.24342	1.8707	-3.33747	0.000845442	0.00393174
FBgn0032132	73.3732	-6.23831	0.85925	-7.26017	3.86596e-13	1.1649e-11
FBgn0263207	40.9373	-6.16129	1.09203	-5.64204	1.68048e-08	2.42815e-07
FBgn0001254	3187.4	-6.14722	0.343472	-17.8973	1.23825e-71	1.93485e-68
FBgn0034456	79.5192	-6.12719	0.921576	-6.6486	2.95891e-11	6.7567e-10
FBgn0034580	26.4871	-6.11077	1.44535	-4.22788	2.35908e-05	0.000173295
FBgn0024249	6.81897	-6.08872	1.89144	-3.21909	0.00128598	0.00563933
FBgn0037463	6.74738	-6.07166	1.80131	-3.37069	0.0007498	0.00355983
FBgn0028939	2888.91	-6.02291	1.10274	-5.46178	4.71387e-08	6.30322e-07
FBgn0085222	171.387	-6.02266	1.98048	-3.04101	0.00235789	0.00943674
FBgn0034998	6.49935	-6.02063	1.98784	-3.02874	0.00245578	0.00977843
FBgn0038361	6.20849	-5.95231	2.07279	-2.87164	0.00408344	0.0149681
FBgn0040796	6.16175	-5.93845	2.09294	-2.83737	0.00454873	0.0162968
FBgn0004588	20.1686	-5.92684	1.38189	-4.28893	1.79538e-05	0.000135902
FBgn0036652	61.8153	-5.89069	0.822667	-7.16047	8.04003e-13	2.30214e-11
FBgn0001224	31358.2	-5.88689	1.01766	-5.78471	7.26373e-09	1.11048e-07
FBgn0030116	5.88737	-5.87748	1.98758	-2.9571	0.00310548	0.011906
FBgn0039027	5.78732	-5.84849	2.10864	-2.77359	0.00554421	0.0192272
FBgn0034462	252.245	-5.84632	2.04499	-2.85886	0.00425169	0.0154092
FBgn0051279	5.6004	-5.80425	1.93932	-2.99293	0.00276312	0.0108274
FBgn0004431	1820.44	-5.79228	0.571079	-10.1427	3.57065e-24	3.42594e-22
FBgn0030409	5.4725	-5.77267	2.19975	-2.62424	0.00868423	0.0281113
FBgn0036568	17.0725	-5.69682	1.43203	-3.97814	6.94554e-05	0.000446359
FBgn0040682	232.566	-5.68845	1.84031	-3.09104	0.00199459	0.00817109
FBgn0086074	4.92431	-5.6181	1.98599	-2.82886	0.0046714	0.0166762
FBgn0031512	354.139	-5.55167	2.29504	-2.41899	0.0155639	0.0454816
FBgn0013755	4.63495	-5.53252	2.09599	-2.63958	0.008301	0.027063
FBgn0036330	4.62956	-5.52894	2.12432	-2.60268	0.0092497	0.029687
FBgn0025680	109.51	-5.51808	0.62073	-8.88966	6.12955e-19	3.67471e-17
FBgn0266072	41.2923	-5.51748	0.960717	-5.74308	9.29695e-09	1.39301e-07
FBgn0003009	4.5331	-5.5001	2.06771	-2.66	0.00781402	0.0257517
FBgn0288701	14.907	-5.49652	1.43968	-3.81787	0.00013461	0.000798027
FBgn0051636	260.144	-5.49062	0.56173	-9.77449	1.44891e-22	1.16531e-20
FBgn0262845	4.39201	-5.45239	2.0262	-2.69095	0.00712494	0.0238472
FBgn0039028	4.30754	-5.42568	2.06364	-2.62919	0.00855895	0.027788
FBgn0034487	29.6856	-5.36171	1.05227	-5.09537	3.48062e-07	3.90472e-06
FBgn0265309	4.10863	-5.35365	2.12765	-2.51623	0.0118618	0.0363941
FBgn0266941	4.07509	-5.3447	2.19068	-2.43974	0.0146979	0.0434151
FBgn0050177	4.0664	-5.33932	2.0991	-2.54362	0.010971	0.0342272
FBgn0030900	24.5192	-5.26142	1.16601	-4.51234	6.41175e-06	5.37408e-05
FBgn0264381	3.79051	-5.24021	2.12844	-2.46199	0.0138168	0.0413145
FBgn0030290	12.4819	-5.23899	1.44637	-3.62216	0.000292154	0.00158119
FBgn0050360	814.65	-5.23676	0.567115	-9.23404	2.6062e-20	1.80422e-18
FBgn0003373	115874	-5.23374	2.08429	-2.51105	0.0120373	0.0368086
FBgn0264862	3.76355	-5.23035	2.14953	-2.43325	0.0149639	0.0440423
FBgn0034924	3.76176	-5.22973	2.161	-2.42005	0.0155186	0.0453845
FBgn0032549	119.954	-5.20947	1.89621	-2.74731	0.00600863	0.0205704
FBgn0034663	46.3904	-5.20254	0.893085	-5.82536	5.69901e-09	8.91785e-08
FBgn0036229	147.502	-5.19222	0.709281	-7.3204	2.47226e-13	7.6605e-12
FBgn0035751	18.67	-5.17575	1.27749	-4.0515	5.08909e-05	0.000339624
FBgn0034076	106.928	-5.16438	0.635693	-8.12401	4.51013e-16	1.91209e-14
FBgn0050145	13.6759	-5.08139	1.45781	-3.48563	0.000490972	0.00247591
FBgn0039685	180677	-5.07511	1.21951	-4.1616	3.1603e-05	0.000224901
FBgn0003950	48.3149	-5.00292	0.791858	-6.31795	2.65058e-10	5.24357e-09
FBgn0262880	138.284	-4.97624	0.521345	-9.54501	1.36092e-21	1.01263e-19
FBgn0036956	38.0953	-4.93766	0.96562	-5.11346	3.16305e-07	3.58895e-06
FBgn0264745	55.1844	-4.93194	0.925999	-5.32608	1.00355e-07	1.26462e-06
FBgn0263049	9.77154	-4.89898	1.55936	-3.14166	0.00167993	0.00706732
FBgn0000808	27.4544	-4.85774	1.04259	-4.65928	3.17319e-06	2.87083e-05
FBgn0030108	5.83702	-4.84796	1.79451	-2.70155	0.0069017	0.023178
FBgn0051296	11.7891	-4.83445	1.56834	-3.08252	0.00205255	0.00835533
FBgn0036417	120.156	-4.83008	0.853682	-5.65794	1.53203e-08	2.22397e-07
FBgn0039795	243.106	-4.80661	0.49114	-9.78665	1.28488e-22	1.04104e-20
FBgn0265799	5.52921	-4.79085	1.79673	-2.66643	0.00766626	0.0253871
FBgn0038440	33.4208	-4.7857	1.12337	-4.26012	2.04315e-05	0.000152546
FBgn0050074	66.7917	-4.76673	0.674973	-7.06211	1.63998e-12	4.42917e-11
FBgn0033866	32.4514	-4.71295	0.949832	-4.96188	6.98155e-07	7.38532e-06
FBgn0038716	2646.22	-4.70856	0.437315	-10.767	4.92963e-27	6.82535e-25
FBgn0041233	5.33512	-4.70668	1.81776	-2.58928	0.00961778	0.0306614
FBgn0263211	14.5603	-4.67427	1.22401	-3.8188	0.000134102	0.000795451
FBgn0051477	8.08778	-4.66754	1.84065	-2.53581	0.0112188	0.0348116
FBgn0266973	22.9465	-4.62435	1.1708	-3.94974	7.82371e-05	0.000496667
FBgn0040801	8.06081	-4.62406	1.61764	-2.85853	0.00425606	0.0154199
FBgn0039241	18411.1	-4.62379	0.486873	-9.49691	2.1621e-21	1.58719e-19
FBgn0032067	14.8385	-4.59908	1.24581	-3.69164	0.000222813	0.00124217
FBgn0053926	2371.87	-4.53976	0.370432	-12.2553	1.57305e-34	3.82357e-32
FBgn0052745	152.866	-4.51906	0.727097	-6.21521	5.12558e-10	9.66613e-09
FBgn0038851	16.252	-4.50159	1.33458	-3.37304	0.000743433	0.00353397
FBgn0034128	234.453	-4.50126	0.42479	-10.5964	3.09548e-26	3.93702e-24
FBgn0033131	26.0182	-4.49505	0.941481	-4.77445	1.80196e-06	1.73197e-05
FBgn0051658	35.0671	-4.49257	0.816459	-5.50251	3.74423e-08	5.11291e-07
FBgn0035468	7.3359	-4.49086	1.65284	-2.71706	0.00658646	0.0222973
FBgn0265669	7.11812	-4.44951	1.6888	-2.63472	0.00842068	0.0274023
FBgn0030408	20.4057	-4.4442	1.14809	-3.87094	0.000108416	0.000661379
FBgn0001226	16267	-4.43602	0.608582	-7.2891	3.12033e-13	9.53355e-12
FBgn0034274	7.0004	-4.42665	1.68477	-2.62745	0.00860263	0.027905
FBgn0052117	8.82831	-4.40147	1.55705	-2.8268	0.00470152	0.0167782
FBgn0037672	2189.53	-4.38715	0.634377	-6.91568	4.65626e-12	1.17081e-10
FBgn0030756	1383.5	-4.38401	0.392022	-11.1831	4.93483e-29	8.30419e-27
FBgn0036605	6.69726	-4.36611	1.72059	-2.53757	0.0111624	0.0346956
FBgn0039299	14754.7	-4.31853	0.653833	-6.60494	3.97676e-11	8.96862e-10
FBgn0003319	105.731	-4.26096	0.833957	-5.10932	3.23318e-07	3.65713e-06
FBgn0034664	194.408	-4.25637	0.588677	-7.2304	4.81579e-13	1.43139e-11
FBgn0039851	247.704	-4.24593	1.57836	-2.6901	0.00714307	0.023886
FBgn0021738	37.3549	-4.23794	0.75888	-5.58447	2.34415e-08	3.28301e-07
FBgn0033723	9.82274	-4.23435	1.48456	-2.85226	0.00434089	0.0156599
FBgn0002533	46685.9	-4.23108	0.604948	-6.99412	2.66921e-12	6.98464e-11
FBgn0038309	48.1517	-4.22192	1.04768	-4.02978	5.58287e-05	0.000366759
FBgn0033499	9.75534	-4.21815	1.41225	-2.98683	0.00281882	0.0110076
FBgn0266200	9.72898	-4.21747	1.44528	-2.9181	0.00352167	0.0132782
FBgn0032473	15.3375	-4.20514	1.46208	-2.87614	0.00402574	0.0148111
FBgn0263493	895.843	-4.20368	0.502788	-8.36075	6.23204e-17	2.92558e-15
FBgn0052631	19.2255	-4.19664	1.00108	-4.1921	2.76383e-05	0.000199249
FBgn0038191	13.8571	-4.19491	1.55038	-2.70574	0.00681523	0.0229299
FBgn0005638	312.182	-4.1686	0.683089	-6.10258	1.04372e-09	1.8727e-08
FBgn0040367	143.495	-4.13182	0.642129	-6.43457	1.23825e-10	2.58968e-09
FBgn0261514	60.1449	-4.12457	0.699335	-5.89785	3.68263e-09	5.94109e-08
FBgn0019929	15.375	-4.11471	1.11666	-3.68483	0.000228859	0.00127328
FBgn0052305	10.8046	-4.1028	1.44496	-2.83938	0.00452008	0.0162154
FBgn0266681	13.5054	-4.09809	1.26326	-3.24406	0.00117839	0.00523101
FBgn0033297	75.6228	-4.06567	0.910111	-4.46722	7.92427e-06	6.49742e-05
FBgn0043069	891.976	-4.06535	0.444837	-9.13896	6.30529e-20	4.31045e-18
FBgn0264562	785.343	-4.06251	0.513204	-7.91597	2.45328e-15	9.68737e-14
FBgn0037296	10.3639	-4.04849	1.41149	-2.86824	0.00412769	0.0150882
FBgn0261633	35.4751	-3.9673	0.859676	-4.61488	3.93319e-06	3.47225e-05
FBgn0004047	300.07	-3.94996	0.43516	-9.07704	1.11568e-19	7.3074e-18
FBgn0051076	1150.88	-3.94858	0.380726	-10.3712	3.35342e-25	3.86102e-23
FBgn0263617	122.509	-3.91663	0.569857	-6.87299	6.28682e-12	1.5593e-10
FBgn0051274	296.981	-3.91387	0.53444	-7.32332	2.41918e-13	7.5603e-12
FBgn0032262	249.643	-3.89685	1.57012	-2.48188	0.0130693	0.0395222
FBgn0040743	15.793	-3.88666	1.16514	-3.3358	0.000850536	0.003945
FBgn0004865	616.807	-3.88598	0.434472	-8.94414	3.74864e-19	2.30623e-17
FBgn0010401	9.28121	-3.85635	1.37137	-2.81204	0.00492289	0.0174261
FBgn0085424	73.1486	-3.84918	0.809028	-4.75779	1.95727e-06	1.86649e-05
FBgn0001229	1076.78	-3.84838	0.34761	-11.071	1.73503e-28	2.8325e-26
FBgn0038784	3380.62	-3.84624	0.461513	-8.33397	7.81749e-17	3.60792e-15
FBgn0039459	1179.77	-3.84031	0.291679	-13.1662	1.37295e-39	5.17839e-37
FBgn0267221	8.9315	-3.81753	1.469	-2.59873	0.00935685	0.0299605
FBgn0262036	242.08	-3.80993	0.493288	-7.72353	1.1315e-14	4.0183e-13
FBgn0002569	82.8804	-3.79971	0.75682	-5.02064	5.15008e-07	5.61631e-06
FBgn0030493	155.952	-3.76826	0.487055	-7.73682	1.01932e-14	3.64357e-13
FBgn0038943	7274.02	-3.76447	0.402547	-9.35162	8.63149e-21	6.09105e-19
FBgn0034785	57.6458	-3.76184	0.634492	-5.9289	3.04975e-09	5.02381e-08
FBgn0020906	5207.07	-3.76089	0.366073	-10.2736	9.26655e-25	9.6531e-23
FBgn0035875	34.7355	-3.75537	0.964614	-3.89314	9.89566e-05	0.000611518
FBgn0267145	20.3198	-3.75467	1.28067	-2.93181	0.0033699	0.0127897
FBgn0037205	16.0369	-3.73925	1.09639	-3.4105	0.000648443	0.00313835
FBgn0039788	106.249	-3.71763	0.534414	-6.95645	3.48951e-12	8.89704e-11
FBgn0041709	32.658	-3.67261	0.833787	-4.40473	1.05917e-05	8.43177e-05
FBgn0038273	53.793	-3.66956	0.748277	-4.90401	9.38989e-07	9.68017e-06
FBgn0031946	11.6322	-3.64316	1.39079	-2.61949	0.00880626	0.0284635
FBgn0053265	31.034	-3.63714	0.932301	-3.90125	9.56976e-05	0.000595077
FBgn0033997	40.3071	-3.63092	0.709574	-5.11705	3.10357e-07	3.52878e-06
FBgn0039510	74.434	-3.62924	0.548479	-6.61692	3.66764e-11	8.34025e-10
FBgn0034990	17.3367	-3.62823	0.959078	-3.78304	0.000154926	0.000899458
FBgn0003250	25.4874	-3.61918	1.16394	-3.10943	0.0018745	0.00775851
FBgn0029799	96.126	-3.61015	0.602657	-5.99038	2.09347e-09	3.56673e-08
FBgn0033498	20.6778	-3.59992	0.991135	-3.63212	0.000281104	0.00153123
FBgn0030836	5665.93	-3.5994	0.401309	-8.96916	2.98794e-19	1.86755e-17
FBgn0003916	15.5729	-3.59734	1.00767	-3.56997	0.000357025	0.00188563
FBgn0267153	86.9412	-3.58207	0.72469	-4.9429	7.69673e-07	8.08711e-06
FBgn0052447	707.829	-3.57907	0.482008	-7.42533	1.12499e-13	3.64057e-12
FBgn0039852	216.757	-3.57713	0.578664	-6.18171	6.34108e-10	1.17358e-08
FBgn0032505	13.9292	-3.57455	1.24779	-2.86471	0.00417386	0.0151976
FBgn0032652	1482.3	-3.57239	0.418528	-8.53561	1.39416e-17	7.02732e-16
FBgn0001227	238.384	-3.56901	0.670839	-5.32022	1.03642e-07	1.30153e-06
FBgn0002531	157369	-3.55984	0.556984	-6.39128	1.64503e-10	3.33829e-09
FBgn0264310	22.7077	-3.55534	0.821403	-4.32838	1.50211e-05	0.00011538
FBgn0020506	183.217	-3.54247	0.667984	-5.30323	1.13774e-07	1.40935e-06
FBgn0031976	73.8113	-3.54167	0.796192	-4.44826	8.65682e-06	7.0348e-05
FBgn0000079	4504.32	-3.53301	0.390692	-9.04294	1.52513e-19	9.81288e-18
FBgn0288700	79.0838	-3.53197	0.747543	-4.72476	2.30382e-06	2.17422e-05
FBgn0020445	1204.18	-3.52973	0.350818	-10.0614	8.18041e-24	7.33421e-22
FBgn0034301	346.129	-3.52733	0.536458	-6.57522	4.85812e-11	1.08224e-09
FBgn0030105	1804.27	-3.52281	0.659328	-5.34303	9.14053e-08	1.15985e-06
FBgn0038074	1569.97	-3.51169	0.494105	-7.10718	1.1844e-12	3.27147e-11
FBgn0000449	26.9765	-3.50334	0.901724	-3.88516	0.000102264	0.000628936
FBgn0037730	1478.62	-3.49655	0.348051	-10.0461	9.55937e-24	8.43229e-22
FBgn0034999	4487.41	-3.48513	0.287402	-12.1263	7.66053e-34	1.82154e-31
FBgn0033680	54.7247	-3.48465	0.695805	-5.00808	5.49753e-07	5.96548e-06
FBgn0038018	11.9983	-3.4647	1.19984	-2.88763	0.00388158	0.0143775
FBgn0034429	194.182	-3.44986	0.380989	-9.05501	1.36552e-19	8.8379e-18
FBgn0050009	100.507	-3.44886	0.837472	-4.11818	3.8187e-05	0.000264695
FBgn0020641	44.9434	-3.44107	1.02572	-3.35479	0.000794245	0.00373654
FBgn0267195	29.5878	-3.43894	0.772405	-4.45225	8.49752e-06	6.92077e-05
FBgn0029856	78.5096	-3.43459	0.490304	-7.00502	2.46955e-12	6.47768e-11
FBgn0031853	12.9296	-3.42929	1.20633	-2.84275	0.0044726	0.0160752
FBgn0262893	37.2278	-3.42331	0.683594	-5.00781	5.50517e-07	5.96603e-06
FBgn0033312	21.2966	-3.41529	0.992768	-3.44017	0.000581354	0.0028515
FBgn0265836	78.9547	-3.4067	0.69194	-4.92339	8.50561e-07	8.84237e-06
FBgn0039356	131.774	-3.40318	0.412199	-8.25614	1.50453e-16	6.77225e-15
FBgn0035648	27.8854	-3.37167	0.81688	-4.1275	3.66724e-05	0.000255866
FBgn0032337	50.9306	-3.36374	0.574327	-5.85683	4.71781e-09	7.44638e-08
FBgn0038960	8.62035	-3.35366	1.36477	-2.4573	0.0139986	0.0417552
FBgn0034636	610.353	-3.35307	0.471542	-7.11086	1.15326e-12	3.2016e-11
FBgn0263492	18.4918	-3.34586	0.962771	-3.47524	0.000510404	0.00255389
FBgn0004959	876.359	-3.32743	0.412754	-8.06152	7.53529e-16	3.13388e-14
FBgn0266737	15.0313	-3.32739	1.06568	-3.1223	0.00179443	0.0074686
FBgn0266591	44.087	-3.31123	0.739681	-4.47657	7.58528e-06	6.26645e-05
FBgn0039099	660.693	-3.30585	0.330113	-10.0143	1.31922e-23	1.14521e-21
FBgn0031619	81.9861	-3.29774	0.593146	-5.55974	2.70174e-08	3.76935e-07
FBgn0267111	114.607	-3.29268	0.672599	-4.89546	9.80753e-07	1.00633e-05
FBgn0261634	32.1605	-3.29217	1.17336	-2.80576	0.00501981	0.0176947
FBgn0052187	277.128	-3.28906	0.373415	-8.80806	1.27335e-18	7.3305e-17
FBgn0033296	13.0636	-3.27626	1.10085	-2.97611	0.00291929	0.0113111
FBgn0000045	84.5782	-3.26004	0.515279	-6.32674	2.50403e-10	4.97079e-09
FBgn0033817	25.8699	-3.25697	0.760167	-4.28454	1.83119e-05	0.00013823
FBgn0263511	132.49	-3.25305	0.427991	-7.60075	2.94408e-14	9.96978e-13
FBgn0000078	6643.95	-3.25027	0.442767	-7.3408	2.12328e-13	6.65458e-12
FBgn0264789	108.33	-3.23291	0.569873	-5.67304	1.40288e-08	2.04596e-07
FBgn0035290	814.583	-3.21369	0.541883	-5.93058	3.01858e-09	4.97997e-08
FBgn0086917	255.308	-3.20338	0.56405	-5.67924	1.35292e-08	1.98634e-07
FBgn0050184	33.9258	-3.19549	0.844486	-3.78395	0.000154358	0.000897588
FBgn0030326	6842.05	-3.19398	0.517805	-6.1683	6.90286e-10	1.2754e-08
FBgn0034286	186.564	-3.19281	0.628173	-5.08269	3.72129e-07	4.14919e-06
FBgn0033132	699.783	-3.19094	0.303254	-10.5223	6.81649e-26	8.37739e-24
FBgn0029924	1551.12	-3.18713	0.300552	-10.6043	2.84723e-26	3.66388e-24
FBgn0265011	181.162	-3.18546	0.611264	-5.21128	1.87547e-07	2.22493e-06
FBgn0035434	83.6236	-3.18226	1.12714	-2.8233	0.00475317	0.0169184
FBgn0052755	38.5111	-3.17971	0.698391	-4.55291	5.29094e-06	4.51422e-05
FBgn0001134	94.9432	-3.1679	0.490424	-6.45951	1.0504e-10	2.23092e-09
FBgn0034996	81.4851	-3.16035	0.543679	-5.8129	6.14006e-09	9.47249e-08
FBgn0266887	70.7904	-3.15938	0.77143	-4.09548	4.21299e-05	0.000288914
FBgn0038902	14.2205	-3.15132	0.956394	-3.295	0.000984233	0.00445409
FBgn0038508	66.6913	-3.13586	0.708903	-4.42353	9.70996e-06	7.79219e-05
FBgn0266211	24.5399	-3.13102	0.778087	-4.024	5.72186e-05	0.000374541
FBgn0031435	49.7883	-3.12841	0.870046	-3.59568	0.000323543	0.00172461
FBgn0267035	18.178	-3.12746	0.893926	-3.49857	0.000467767	0.00237752
FBgn0022700	264.554	-3.1254	1.24367	-2.51305	0.0119693	0.0366752
FBgn0035949	13.0805	-3.12372	1.19722	-2.60915	0.00907662	0.0292
FBgn0039503	12.9573	-3.1218	1.22992	-2.53821	0.011142	0.0346542
FBgn0002577	48.8603	-3.11807	0.615149	-5.0688	4.0033e-07	4.44549e-06
FBgn0004003	686.184	-3.11584	0.391507	-7.95857	1.74033e-15	7.02427e-14
FBgn0263314	21.7741	-3.11413	1.0091	-3.08605	0.00202833	0.0082845
FBgn0030058	106.499	-3.11199	0.822611	-3.78306	0.000154911	0.000899458
FBgn0032869	34.4778	-3.07035	0.881884	-3.48158	0.000498457	0.00250734
FBgn0035286	198.472	-3.06517	0.530366	-5.77935	7.49916e-09	1.14401e-07
FBgn0031515	1255.91	-3.04651	0.321572	-9.4738	2.69847e-21	1.96773e-19
FBgn0052115	254.63	-3.04413	0.410709	-7.41189	1.24511e-13	4.01742e-12
FBgn0000427	24.7398	-3.03463	1.05545	-2.8752	0.00403777	0.014841
FBgn0039704	395.101	-3.03314	0.464927	-6.52392	6.84953e-11	1.50745e-09
FBgn0039129	22.3905	-3.01794	0.943085	-3.20007	0.00137393	0.0059597
FBgn0036665	33.5236	-3.0138	0.671259	-4.48977	7.13008e-06	5.9262e-05
FBgn0265661	11.4089	-2.98602	1.17194	-2.54793	0.0108363	0.0338748
FBgn0031324	15.7081	-2.98084	1.03922	-2.86835	0.00412625	0.0150882
FBgn0035160	846.473	-2.9795	0.33287	-8.95094	3.52459e-19	2.19046e-17
FBgn0266802	19.4012	-2.9769	1.02155	-2.91409	0.00356723	0.0134268
FBgn0036677	68.0175	-2.9719	0.670572	-4.4319	9.34082e-06	7.53465e-05
FBgn0051075	20733.9	-2.97151	0.329149	-9.02783	1.75107e-19	1.12007e-17
FBgn0038485	21.488	-2.96186	1.23842	-2.39165	0.0167729	0.0483557
FBgn0030876	1672.65	-2.95827	0.37916	-7.80217	6.08512e-15	2.25624e-13
FBgn0267810	18.9199	-2.95675	1.00222	-2.9502	0.00317564	0.0121494
FBgn0032713	1640.34	-2.95551	0.329084	-8.98103	2.68247e-19	1.696e-17
FBgn0030097	1667.71	-2.95176	0.435453	-6.77859	1.21356e-11	2.91734e-10
FBgn0085345	16.8792	-2.94518	1.08233	-2.72115	0.00650543	0.0220367
FBgn0036689	45.0084	-2.94353	0.697951	-4.21738	2.47155e-05	0.000180707
FBgn0266228	15.3046	-2.94283	1.13183	-2.60006	0.00932064	0.0298708
FBgn0052706	39.6723	-2.93527	0.708444	-4.14326	3.42397e-05	0.000241155
FBgn0035727	30.1563	-2.92817	0.82568	-3.54638	0.000390564	0.00203816
FBgn0004581	17.3933	-2.92188	0.953175	-3.06542	0.00217368	0.00880255
FBgn0031417	396.242	-2.91465	0.521119	-5.59305	2.23112e-08	3.1489e-07
FBgn0038071	1069.89	-2.91425	0.513186	-5.67875	1.35683e-08	1.98941e-07
FBgn0051174	61.0969	-2.9073	0.539582	-5.38806	7.12221e-08	9.19749e-07
FBgn0034098	27.3346	-2.90242	0.793894	-3.65593	0.000256255	0.00140709
FBgn0001225	2626.63	-2.89775	0.710563	-4.0781	4.54059e-05	0.000308286
FBgn0036846	1833.79	-2.87072	0.266875	-10.7568	5.5053e-27	7.52712e-25
FBgn0034103	32.0642	-2.86955	0.872953	-3.28718	0.00101196	0.00457013
FBgn0037304	421.822	-2.85464	0.698628	-4.08606	4.38757e-05	0.000299308
FBgn0039678	2329.06	-2.85037	0.451865	-6.30802	2.82635e-10	5.5502e-09
FBgn0029837	68.052	-2.84928	0.670399	-4.25013	2.13645e-05	0.00015897
FBgn0050383	24.4406	-2.84794	0.83245	-3.42115	0.000623565	0.00303405
FBgn0000320	566.257	-2.84563	0.49547	-5.7433	9.28517e-09	1.39301e-07
FBgn0039189	820.385	-2.84116	0.274039	-10.3677	3.47674e-25	3.96131e-23
FBgn0030770	28.6416	-2.83122	0.940574	-3.01009	0.00261166	0.0103277
FBgn0028407	65.5229	-2.82914	0.698894	-4.04803	5.16508e-05	0.000343857
FBgn0004511	14.74	-2.82683	0.922747	-3.0635	0.00218768	0.00885268
FBgn0287620	44.9578	-2.81269	0.730022	-3.85289	0.000116734	0.000702717
FBgn0035948	49.792	-2.79968	0.608757	-4.59902	4.24491e-06	3.73238e-05
FBgn0003312	547.512	-2.79902	0.556442	-5.0302	4.8996e-07	5.36454e-06
FBgn0264479	20.5728	-2.79167	0.94368	-2.95828	0.0030936	0.0118745
FBgn0041194	4067.6	-2.78994	0.35137	-7.94019	2.01866e-15	8.07907e-14
FBgn0038565	16.7019	-2.78191	1.16896	-2.37982	0.0173212	0.0497137
FBgn0052279	122.919	-2.77043	0.818845	-3.38333	0.000716119	0.00341601
FBgn0019952	5095.57	-2.74886	0.272212	-10.0982	5.62498e-24	5.17026e-22
FBgn0031058	29.3063	-2.74854	0.786255	-3.49573	0.000472761	0.00240068
FBgn0037538	2111.17	-2.74431	0.318038	-8.6289	6.19471e-18	3.22656e-16
FBgn0051183	765.115	-2.74076	0.368725	-7.4331	1.06084e-13	3.44318e-12
FBgn0031432	459.564	-2.728	0.492296	-5.54139	3.00089e-08	4.16544e-07
FBgn0038312	988.102	-2.72291	0.282681	-9.63245	5.83245e-22	4.49263e-20
FBgn0025382	289.518	-2.72179	0.495592	-5.49199	3.97425e-08	5.39334e-07
FBgn0037974	1238.89	-2.71284	0.360958	-7.51567	5.66184e-14	1.87097e-12
FBgn0033725	40458.8	-2.69239	0.480406	-5.60441	2.08972e-08	2.95696e-07
FBgn0037742	49.3968	-2.69087	0.674149	-3.99151	6.56539e-05	0.000424171
FBgn0001285	4531.96	-2.6863	0.654841	-4.10222	4.09202e-05	0.000281854
FBgn0031384	415.045	-2.67639	0.418225	-6.39939	1.55995e-10	3.1893e-09
FBgn0030955	7934.15	-2.67179	0.302131	-8.84316	9.30512e-19	5.50159e-17
FBgn0035725	155.797	-2.66399	0.561973	-4.74043	2.13263e-06	2.01962e-05
FBgn0031756	22.7367	-2.65548	0.944552	-2.81136	0.00493325	0.0174515
FBgn0031717	2047.03	-2.65526	0.247689	-10.7202	8.18679e-27	1.09204e-24
FBgn0013277	106.463	-2.65064	0.624451	-4.24475	2.18837e-05	0.000162611
FBgn0264005	87.338	-2.63521	0.614294	-4.28982	1.78817e-05	0.00013545
FBgn0025456	5441.89	-2.61668	0.313724	-8.34072	7.38371e-17	3.43672e-15
FBgn0000928	12.7315	-2.6164	0.952527	-2.7468	0.00601807	0.0205963
FBgn0038150	26.2474	-2.61633	0.719363	-3.63701	0.000275822	0.00150321
FBgn0031741	556.494	-2.61388	0.442271	-5.91013	3.41837e-09	5.564e-08
FBgn0262108	450.268	-2.5946	0.311247	-8.33614	7.67542e-17	3.55736e-15
FBgn0083978	312.209	-2.59271	0.556	-4.66314	3.11417e-06	2.82679e-05
FBgn0038815	333.326	-2.58488	0.515172	-5.01751	5.23466e-07	5.70214e-06
FBgn0020248	48.2847	-2.58269	0.583461	-4.4265	9.57762e-06	7.70861e-05
FBgn0038079	666.897	-2.57632	0.407141	-6.32782	2.48654e-10	4.94505e-09
FBgn0031675	151.241	-2.56219	0.678047	-3.77878	0.000157601	0.000913053
FBgn0000640	141317	-2.55254	0.466401	-5.47284	4.42876e-08	5.95839e-07
FBgn0005677	1080.66	-2.55028	0.647454	-3.93893	8.18458e-05	0.000517473
FBgn0034470	29039.1	-2.54324	0.489077	-5.20008	1.99205e-07	2.34542e-06
FBgn0034705	316.521	-2.54027	0.303517	-8.36946	5.78833e-17	2.74081e-15
FBgn0002732	458.6	-2.53278	0.612921	-4.13231	3.59141e-05	0.00025133
FBgn0263336	69.6409	-2.53222	0.763812	-3.31524	0.000915642	0.00419752
FBgn0016054	104.497	-2.52913	0.437083	-5.78638	7.19214e-09	1.10179e-07
FBgn0038311	77.3861	-2.5285	0.532511	-4.74825	2.05184e-06	1.94987e-05
FBgn0051559	28.8611	-2.52713	0.87492	-2.88841	0.00387191	0.0143514
FBgn0000557	3060.07	-2.52607	0.541863	-4.66182	3.13425e-06	2.8403e-05
FBgn0030183	136.153	-2.51806	0.450357	-5.59126	2.25433e-08	3.17755e-07
FBgn0032727	5867.91	-2.5158	0.276083	-9.11249	8.05093e-20	5.40252e-18
FBgn0031519	38.0352	-2.51399	0.872979	-2.87978	0.00397953	0.0146856
FBgn0020378	1063.88	-2.51346	0.605067	-4.15401	3.26697e-05	0.000231889
FBgn0031939	1527.87	-2.51194	0.393621	-6.38163	1.75216e-10	3.52948e-09
FBgn0043001	523.207	-2.50925	0.401403	-6.2512	4.07313e-10	7.7888e-09
FBgn0037690	58.2535	-2.50161	0.61933	-4.03921	5.3631e-05	0.000355956
FBgn0038447	23.8444	-2.49964	0.935968	-2.67065	0.00757041	0.0251229
FBgn0004577	3407.77	-2.48437	0.557089	-4.45956	8.21284e-06	6.7139e-05
FBgn0032877	231.356	-2.479	0.360162	-6.88302	5.85987e-12	1.46003e-10
FBgn0037676	53.4693	-2.47618	0.687543	-3.60149	0.000316395	0.00168981
FBgn0000052	6729.01	-2.47413	0.327513	-7.55429	4.2116e-14	1.41308e-12
FBgn0031378	172.097	-2.47342	0.363594	-6.80269	1.02684e-11	2.49037e-10
FBgn0004896	111.685	-2.46167	0.536338	-4.58977	4.4373e-06	3.86734e-05
FBgn0038528	32.4393	-2.44327	0.696537	-3.50773	0.00045194	0.00231104
FBgn0262987	43.4461	-2.4389	0.741582	-3.28878	0.00100621	0.00454604
FBgn0036640	134.148	-2.42889	0.48248	-5.03419	4.7988e-07	5.26473e-06
FBgn0003975	252.967	-2.42785	0.610564	-3.9764	6.99651e-05	0.000448844
FBgn0031301	23.5377	-2.41953	0.766602	-3.15618	0.00159852	0.00677171
FBgn0261953	239.564	-2.41682	0.550562	-4.38973	1.13494e-05	8.99563e-05
FBgn0053503	310.318	-2.40017	0.495523	-4.84371	1.27435e-06	1.27488e-05
FBgn0052205	205.243	-2.39905	0.364398	-6.5836	4.59182e-11	1.0271e-09
FBgn0261245	25.228	-2.39825	0.691814	-3.46661	0.000527065	0.00262405
FBgn0034366	788.436	-2.39638	0.269322	-8.89782	5.69558e-19	3.44189e-17
FBgn0000529	31.53	-2.39601	0.929228	-2.5785	0.00992313	0.0314789
FBgn0027546	359.085	-2.39442	0.486209	-4.92467	8.45019e-07	8.81108e-06
FBgn0262112	1252.41	-2.38555	0.521211	-4.57693	4.71843e-06	4.08308e-05
FBgn0013278	348.283	-2.37984	0.519486	-4.58114	4.62448e-06	4.00812e-05
FBgn0036678	283.07	-2.37672	0.522827	-4.54591	5.46994e-06	4.6452e-05
FBgn0029970	182.062	-2.376	0.670457	-3.54384	0.000394339	0.00205492
FBgn0020513	10222.7	-2.37549	0.332614	-7.14188	9.20631e-13	2.60313e-11
FBgn0032414	465.018	-2.3723	0.741857	-3.19779	0.00138483	0.00600131
FBgn0040376	21.1778	-2.363	0.792196	-2.98284	0.00285584	0.0111085
FBgn0035041	448.209	-2.36149	0.591071	-3.99528	6.46183e-05	0.000418222
FBgn0032350	3089.49	-2.36128	0.232574	-10.1528	3.22059e-24	3.19116e-22
FBgn0051072	3476.25	-2.35738	0.312344	-7.54737	4.44133e-14	1.48108e-12
FBgn0035211	354.338	-2.35484	0.305505	-7.70803	1.27778e-14	4.49401e-13
FBgn0262686	28.7397	-2.34244	0.69571	-3.36697	0.000759976	0.00359698
FBgn0030494	1649.05	-2.33863	0.395282	-5.91635	3.29155e-09	5.38161e-08
FBgn0051125	205.414	-2.33821	0.455572	-5.13247	2.85961e-07	3.276e-06
FBgn0065035	154.161	-2.33483	0.484868	-4.8154	1.46905e-06	1.44112e-05
FBgn0045064	806.716	-2.33003	0.282846	-8.23781	1.75398e-16	7.83064e-15
FBgn0039848	53.9768	-2.32937	0.688264	-3.38442	0.000713289	0.00340399
FBgn0287454	1029.89	-2.32905	0.301723	-7.71914	1.17114e-14	4.13225e-13
FBgn0031434	147.543	-2.32846	0.460869	-5.05232	4.36466e-07	4.82229e-06
FBgn0016076	6442.99	-2.32751	0.352192	-6.60866	3.87819e-11	8.78254e-10
FBgn0003482	15.4976	-2.32512	0.91926	-2.52933	0.011428	0.0353505
FBgn0033885	18.2034	-2.3224	0.899281	-2.58251	0.0098085	0.0311604
FBgn0031254	21.2317	-2.31229	0.794269	-2.91122	0.00360023	0.0135212
FBgn0035699	400.785	-2.30826	0.566917	-4.0716	4.66913e-05	0.000315432
FBgn0031707	21.5734	-2.30511	0.820286	-2.81012	0.00495225	0.0175127
FBgn0085290	25.7365	-2.29723	0.699321	-3.28495	0.00102002	0.00460272
FBgn0264273	466.956	-2.29156	0.752747	-3.04426	0.00233254	0.00935186
FBgn0033785	439.425	-2.29099	0.315832	-7.25384	4.05124e-13	1.21737e-11
FBgn0050489	1338.27	-2.288	0.41575	-5.50331	3.72733e-08	5.09619e-07
FBgn0000053	10640.5	-2.28575	0.332619	-6.87198	6.33159e-12	1.56685e-10
FBgn0039881	70.2583	-2.27759	0.738362	-3.08465	0.00203789	0.00831732
FBgn0036062	90.5385	-2.27647	0.474655	-4.79606	1.61815e-06	1.57607e-05
FBgn0029813	71.1079	-2.26681	0.533247	-4.25095	2.12863e-05	0.000158495
FBgn0053774	82.857	-2.26657	0.482337	-4.69914	2.61254e-06	2.41555e-05
FBgn0003447	3030.46	-2.26624	0.322569	-7.02559	2.13167e-12	5.61838e-11
FBgn0260943	321.162	-2.26415	0.810029	-2.79514	0.0051877	0.0182044
FBgn0028499	438.162	-2.2611	0.404853	-5.58498	2.33721e-08	3.27748e-07
FBgn0030361	114.277	-2.25613	0.450987	-5.00264	5.6549e-07	6.09393e-06
FBgn0004784	16.014	-2.25326	0.902389	-2.49699	0.0125252	0.0381293
FBgn0264490	91.936	-2.25047	0.829453	-2.71319	0.00666385	0.0224851
FBgn0039283	207.384	-2.24973	0.606496	-3.70939	0.000207757	0.00116476
FBgn0267792	2542.49	-2.24484	0.255653	-8.78081	1.62308e-18	9.19856e-17
FBgn0019650	236.409	-2.24483	0.574906	-3.90469	9.43448e-05	0.000587333
FBgn0029826	614.339	-2.24349	0.374306	-5.99373	2.05078e-09	3.49944e-08
FBgn0051354	306.998	-2.2433	0.577327	-3.88567	0.000102046	0.000628833
FBgn0026320	783.187	-2.23677	0.557033	-4.0155	5.93193e-05	0.000387133
FBgn0029588	23.6811	-2.23563	0.701086	-3.18881	0.00142861	0.00616414
FBgn0051148	113.996	-2.23542	0.571468	-3.91171	9.16457e-05	0.000572158
FBgn0039130	2701.89	-2.23541	0.257107	-8.69446	3.48496e-18	1.88705e-16
FBgn0003720	72.9806	-2.23518	0.727234	-3.07353	0.00211541	0.00858565
FBgn0039045	19.7397	-2.23446	0.817309	-2.73392	0.00625857	0.0213392
FBgn0031896	589.459	-2.23346	0.438033	-5.09885	3.41725e-07	3.84151e-06
FBgn0038221	47.7168	-2.23167	0.545088	-4.09414	4.2373e-05	0.000290217
FBgn0013279	180.246	-2.22208	0.665633	-3.3383	0.000842928	0.00392171
FBgn0028370	78.7391	-2.21991	0.876989	-2.53128	0.0113647	0.0352044
FBgn0085282	373.099	-2.21934	0.408309	-5.43543	5.46647e-08	7.19521e-07
FBgn0001263	41.4374	-2.21908	0.749955	-2.95895	0.00308685	0.0118595
FBgn0034443	7537.14	-2.21754	0.30993	-7.15497	8.36931e-13	2.38395e-11
FBgn0260955	281.741	-2.21497	0.463829	-4.7754	1.79353e-06	1.72539e-05
FBgn0262029	2325.17	-2.20823	0.55157	-4.00353	6.24036e-05	0.000405087
FBgn0034567	50.4563	-2.20537	0.696918	-3.16447	0.00155368	0.0066229
FBgn0000565	5414.79	-2.19661	0.381273	-5.76126	8.34899e-09	1.26309e-07
FBgn0083975	97.2215	-2.19212	0.620855	-3.53081	0.000414294	0.00214359
FBgn0259823	231.719	-2.19108	0.655953	-3.3403	0.000836875	0.00390185
FBgn0004897	78.6115	-2.1893	0.478558	-4.57478	4.76719e-06	4.11876e-05
FBgn0046876	521.958	-2.18639	0.399814	-5.46853	4.53789e-08	6.09772e-07
FBgn0032399	192.264	-2.1755	0.486349	-4.47312	7.70875e-06	6.348e-05
FBgn0035099	602.703	-2.17187	0.401585	-5.40825	6.36436e-08	8.29718e-07
FBgn0052227	463.174	-2.1688	0.572402	-3.78894	0.000151289	0.00088256
FBgn0030929	1651.26	-2.16733	0.482162	-4.49502	6.95622e-06	5.7905e-05
FBgn0038826	5474.05	-2.16234	0.566422	-3.81754	0.00013479	0.000798663
FBgn0001253	436.059	-2.14954	0.546039	-3.93661	8.26399e-05	0.000522192
FBgn0030813	165.024	-2.1482	0.393385	-5.46081	4.73972e-08	6.33004e-07
FBgn0032377	63.5419	-2.14595	0.585507	-3.66512	0.000247225	0.00136229
FBgn0037838	68.3237	-2.13873	0.60812	-3.51695	0.000436543	0.00224069
FBgn0051453	1062.56	-2.13764	0.359876	-5.93993	2.85143e-09	4.71845e-08
FBgn0034396	739.56	-2.13758	0.352907	-6.05706	1.38634e-09	2.43009e-08
FBgn0267668	271.54	-2.13127	0.343268	-6.20876	5.34056e-10	1.00026e-08
FBgn0266709	72.7023	-2.1298	0.436403	-4.88035	1.05899e-06	1.07153e-05
FBgn0028400	991.721	-2.12074	0.506211	-4.18944	2.7965e-05	0.00020137
FBgn0001977	1597.46	-2.11984	0.272691	-7.77376	7.61877e-15	2.76857e-13
FBgn0051957	138.743	-2.11865	0.408227	-5.18989	2.1042e-07	2.46158e-06
FBgn0014179	37.8472	-2.11576	0.726665	-2.9116	0.0035958	0.0135204
FBgn0265533	93.0632	-2.11046	0.421507	-5.00694	5.53025e-07	5.98317e-06
FBgn0283479	3831.81	-2.10864	0.543605	-3.879	0.000104888	0.000642005
FBgn0004644	449.554	-2.10579	0.418367	-5.03336	4.81956e-07	5.2822e-06
FBgn0035522	156.832	-2.10499	0.398136	-5.28711	1.24264e-07	1.53063e-06
FBgn0000180	418.64	-2.10442	0.576592	-3.64975	0.000262496	0.00143847
FBgn0031375	127.351	-2.10383	0.807089	-2.60669	0.00914214	0.0293935
FBgn0032733	185.637	-2.10334	0.361154	-5.82396	5.74705e-09	8.98018e-08
FBgn0052758	3491.75	-2.10175	0.306938	-6.84749	7.51591e-12	1.84739e-10
FBgn0051953	286.321	-2.09683	0.328237	-6.38815	1.67906e-10	3.40103e-09
FBgn0033960	231.293	-2.09536	0.603553	-3.47172	0.000517137	0.00258167
FBgn0031913	6435.28	-2.09331	0.316593	-6.61199	3.79197e-11	8.60509e-10
FBgn0001138	509.65	-2.0929	0.356123	-5.87689	4.18035e-09	6.6654e-08
FBgn0033440	86.9747	-2.09275	0.444622	-4.70682	2.51612e-06	2.33826e-05
FBgn0035311	157.756	-2.08311	0.406598	-5.12326	3.003e-07	3.42154e-06
FBgn0035964	4162.77	-2.08112	0.334057	-6.22984	4.66926e-10	8.85137e-09
FBgn0003326	463.114	-2.0798	0.634	-3.28045	0.00103642	0.00466903
FBgn0037624	145.065	-2.07782	0.401105	-5.18023	2.2161e-07	2.58419e-06
FBgn0266521	2575.86	-2.07608	0.468074	-4.43537	9.19158e-06	7.42522e-05
FBgn0037472	1227.45	-2.07237	0.319014	-6.49617	8.23914e-11	1.78672e-09
FBgn0031100	34.4032	-2.07176	0.819081	-2.52937	0.0114268	0.0353505
FBgn0262362	377.129	-2.07138	0.47483	-4.36235	1.28671e-05	0.000100672
FBgn0036410	2425.02	-2.06639	0.448256	-4.60985	4.02957e-06	3.55161e-05
FBgn0003162	4258.72	-2.05298	0.364743	-5.62858	1.81703e-08	2.6048e-07
FBgn0038783	1263.13	-2.05188	0.434537	-4.72199	2.33545e-06	2.19649e-05
FBgn0051344	648.742	-2.05135	0.321279	-6.38493	1.71474e-10	3.46048e-09
FBgn0036549	675.712	-2.04855	0.339994	-6.02526	1.68839e-09	2.91288e-08
FBgn0023215	476.575	-2.04752	0.755603	-2.70978	0.00673276	0.0226943
FBgn0266777	128.953	-2.04259	0.489204	-4.17533	2.97553e-05	0.000212861
FBgn0002633	131.795	-2.0347	0.646788	-3.14586	0.00165602	0.00698554
FBgn0031001	253.903	-2.03392	0.390948	-5.20254	1.96581e-07	2.31953e-06
FBgn0040207	1903.05	-2.03191	0.251507	-8.07893	6.53374e-16	2.73537e-14
FBgn0035264	332.028	-2.02866	0.473924	-4.28055	1.86429e-05	0.000140535
FBgn0010042	123.708	-2.02432	0.594726	-3.40379	0.000664582	0.00320229
FBgn0031895	239.958	-2.02251	0.371171	-5.44899	5.06557e-08	6.69978e-07
FBgn0024289	763.108	-2.02236	0.482394	-4.19234	2.76097e-05	0.000199249
FBgn0086693	57.1995	-2.01512	0.55164	-3.65297	0.000259221	0.00142123
FBgn0030230	192.025	-2.01082	0.399122	-5.03812	4.70123e-07	5.16805e-06
FBgn0085407	121.682	-2.00834	0.714069	-2.81253	0.00491535	0.017405
FBgn0032891	139.025	-2.00655	0.413834	-4.84867	1.24289e-06	1.24494e-05
FBgn0026361	194.847	-2.0057	0.372196	-5.38882	7.09204e-08	9.16935e-07
FBgn0051634	25.1736	-2.005	0.752922	-2.66296	0.00774563	0.0255879
FBgn0033830	45.8957	-2.00021	0.791756	-2.5263	0.0115271	0.0355464
FBgn0000071	3944.4	-2.00019	0.351597	-5.68887	1.2788e-08	1.88257e-07
FBgn0032879	31.8293	-1.99708	0.626661	-3.18686	0.00143828	0.00619612
FBgn0038296	141.774	-1.99707	0.632106	-3.15939	0.00158099	0.00670785
FBgn0015550	164.572	-1.99654	0.824375	-2.42188	0.0154403	0.0452171
FBgn0032446	35.7615	-1.99634	0.661187	-3.01932	0.00253341	0.0100582
FBgn0052572	133.475	-1.99444	0.433707	-4.5986	4.25349e-06	3.73692e-05
FBgn0002869	62.5797	-1.99444	0.66696	-2.99034	0.00278669	0.0109094
FBgn0003719	484.501	-1.9924	0.505253	-3.94338	8.03411e-05	0.000509138
FBgn0024184	167.426	-1.99132	0.472038	-4.21857	2.45858e-05	0.000179879
FBgn0036290	80.1403	-1.98709	0.481982	-4.12275	3.74374e-05	0.000260436
FBgn0039107	174.24	-1.98256	0.434575	-4.56207	5.0652e-06	4.3556e-05
FBgn0037712	91.5383	-1.98238	0.725641	-2.73191	0.00629693	0.0214366
FBgn0051955	263.751	-1.98194	0.451398	-4.39066	1.13006e-05	8.96343e-05
FBgn0033789	567.99	-1.98167	0.576943	-3.43477	0.000593064	0.00290243
FBgn0034687	67.8891	-1.98161	0.50701	-3.90842	9.2903e-05	0.000578686
FBgn0023524	197.98	-1.98106	0.822653	-2.40814	0.0160342	0.046607
FBgn0031631	99.4822	-1.97571	0.417035	-4.73753	2.16343e-06	2.04703e-05
FBgn0037581	75.6681	-1.97122	0.591975	-3.3299	0.000868758	0.00401626
FBgn0037902	113.538	-1.96992	0.551782	-3.57011	0.000356838	0.00188555
FBgn0030545	924.017	-1.96949	0.246227	-7.99869	1.25747e-15	5.15139e-14
FBgn0002570	130.999	-1.96777	0.580768	-3.38823	0.000703451	0.00336657
FBgn0035625	218.5	-1.96484	0.4537	-4.3307	1.48636e-05	0.000114331
FBgn0002592	417.552	-1.9589	0.397448	-4.92869	8.27843e-07	8.64022e-06
FBgn0036587	508.977	-1.95585	0.434467	-4.50172	6.74061e-06	5.63602e-05
FBgn0052379	260.147	-1.95367	0.501438	-3.89613	9.77405e-05	0.000605876
FBgn0085334	2297.08	-1.95204	0.683334	-2.85664	0.00428152	0.0154968
FBgn0262851	152.875	-1.94737	0.423845	-4.59454	4.33701e-06	3.789e-05
FBgn0030508	109.738	-1.9463	0.802428	-2.42551	0.0152868	0.0448278
FBgn0030323	279.315	-1.94523	0.3188	-6.10173	1.04925e-09	1.87835e-08
FBgn0038959	99.0095	-1.9405	0.537918	-3.60742	0.000309257	0.00165816
FBgn0030114	4350.29	-1.93866	0.287679	-6.73896	1.59522e-11	3.76047e-10
FBgn0036240	381.623	-1.93798	0.331603	-5.84429	5.08736e-09	7.99505e-08
FBgn0052554	104.745	-1.93797	0.400657	-4.83697	1.3183e-06	1.30612e-05
FBgn0035983	2034.42	-1.93777	0.254473	-7.61482	2.64054e-14	9.02569e-13
FBgn0031558	4724.01	-1.93683	0.343101	-5.64507	1.65117e-08	2.38896e-07
FBgn0011758	144.271	-1.93646	0.446663	-4.33539	1.45503e-05	0.000112236
FBgn0032651	207.084	-1.93291	0.652258	-2.96342	0.00304244	0.0117053
FBgn0020257	2837.74	-1.93225	0.411088	-4.70033	2.59745e-06	2.40566e-05
FBgn0035010	35.1953	-1.93032	0.766888	-2.51709	0.011833	0.0363156
FBgn0031483	371.407	-1.92816	0.355157	-5.42902	5.66645e-08	7.44053e-07
FBgn0264711	800.769	-1.92779	0.420716	-4.58215	4.60214e-06	3.9951e-05
FBgn0030904	45.2516	-1.9231	0.653606	-2.9423	0.00325787	0.0124292
FBgn0004854	184.795	-1.9227	0.358373	-5.36507	8.09199e-08	1.03521e-06
FBgn0263975	26.2027	-1.92229	0.696744	-2.75897	0.00579845	0.0199257
FBgn0038165	292.794	-1.92093	0.77292	-2.48529	0.0129446	0.0391886
FBgn0039161	109.098	-1.92085	0.44109	-4.35479	1.33197e-05	0.000103769
FBgn0035767	1261.97	-1.91786	0.258001	-7.43354	1.05727e-13	3.44181e-12
FBgn0000422	4652.17	-1.91749	0.318665	-6.01725	1.77404e-09	3.05102e-08
FBgn0036984	125.925	-1.91641	0.469022	-4.08598	4.3892e-05	0.000299308
FBgn0003339	265.339	-1.91545	0.418823	-4.57341	4.79846e-06	4.13924e-05
FBgn0051111	100.82	-1.91062	0.407486	-4.6888	2.74807e-06	2.51956e-05
FBgn0028952	58.5954	-1.91016	0.544423	-3.50859	0.000450492	0.00230472
FBgn0031412	68.5384	-1.90613	0.587309	-3.24554	0.0011723	0.00521031
FBgn0037396	1086.14	-1.90055	0.611706	-3.10696	0.00189022	0.00780235
FBgn0037978	1478.23	-1.89373	0.264414	-7.16198	7.95223e-13	2.28298e-11
FBgn0024740	244.565	-1.89349	0.555627	-3.40785	0.000654765	0.00316195
FBgn0031848	86.3159	-1.88883	0.465175	-4.06046	4.89764e-05	0.000328854
FBgn0015904	736.978	-1.88773	0.301452	-6.26212	3.79782e-10	7.30062e-09
FBgn0263354	28.3215	-1.88738	0.711549	-2.6525	0.00798982	0.0262204
FBgn0038070	109.552	-1.88655	0.41155	-4.58402	4.56127e-06	3.96276e-05
FBgn0029079	471.189	-1.88386	0.403964	-4.66343	3.1098e-06	2.82517e-05
FBgn0031697	129.383	-1.88077	0.58069	-3.23886	0.0012001	0.00531446
FBgn0263219	743.963	-1.87856	0.457783	-4.10362	4.06744e-05	0.000280692
FBgn0031702	1641.29	-1.87552	0.358127	-5.23704	1.6317e-07	1.95911e-06
FBgn0052111	109.906	-1.87325	0.751333	-2.49324	0.0126584	0.0384817
FBgn0053985	97.2558	-1.87195	0.555679	-3.36876	0.000755079	0.00358155
FBgn0038725	316.962	-1.86889	0.485015	-3.85326	0.000116554	0.000702404
FBgn0001089	412.404	-1.86809	0.30642	-6.09651	1.0841e-09	1.92908e-08
FBgn0039003	927.508	-1.86721	0.375461	-4.9731	6.58911e-07	6.99414e-06
FBgn0002948	178.422	-1.85609	0.386958	-4.7966	1.6138e-06	1.57465e-05
FBgn0002562	84127.5	-1.85291	0.452543	-4.09445	4.23178e-05	0.00029002
FBgn0005660	272.239	-1.85056	0.329375	-5.61839	1.9275e-08	2.74518e-07
FBgn0052547	85.3508	-1.85016	0.517135	-3.57771	0.000346617	0.00183598
FBgn0004066	8246.09	-1.84755	0.310452	-5.95115	2.66264e-09	4.43286e-08
FBgn0263494	126.063	-1.84685	0.379792	-4.86278	1.15746e-06	1.16256e-05
FBgn0003435	437.54	-1.84624	0.575584	-3.2076	0.00133848	0.00582815
FBgn0031907	6689.07	-1.84441	0.383468	-4.80981	1.51076e-06	1.48071e-05
FBgn0262848	170.021	-1.84243	0.392591	-4.69299	2.69244e-06	2.47479e-05
FBgn0003483	36.3924	-1.84041	0.581279	-3.16615	0.00154473	0.00658979
FBgn0051163	853.608	-1.83599	0.442408	-4.14999	3.32484e-05	0.000235691
FBgn0036685	3824.27	-1.8358	0.241517	-7.60114	2.93545e-14	9.96978e-13
FBgn0264712	1430.97	-1.83506	0.275196	-6.66821	2.58948e-11	5.93788e-10
FBgn0037844	256.023	-1.83273	0.735584	-2.49153	0.0127194	0.0386242
FBgn0041097	324.348	-1.83215	0.53257	-3.44021	0.000581258	0.0028515
FBgn0038917	154.826	-1.83089	0.403084	-4.54221	5.56663e-06	4.71999e-05
FBgn0023549	4980.57	-1.83004	0.331285	-5.52407	3.31231e-08	4.56874e-07
FBgn0010407	144.824	-1.82871	0.565042	-3.23642	0.00121041	0.00535577
FBgn0050345	816.384	-1.82736	0.300843	-6.07412	1.24673e-09	2.19947e-08
FBgn0031535	951.883	-1.82585	0.320139	-5.7033	1.17512e-08	1.73227e-07
FBgn0031716	107.43	-1.82465	0.607947	-3.00133	0.00268805	0.0105914
FBgn0004666	50.9867	-1.82425	0.611354	-2.98395	0.00284551	0.0110828
FBgn0062412	2866.14	-1.82047	0.312719	-5.82142	5.83508e-09	9.10472e-08
FBgn0005612	3795.75	-1.81573	0.336769	-5.39162	6.98254e-08	9.04917e-07
FBgn0267119	52.8724	-1.81475	0.656877	-2.7627	0.00573259	0.0197614
FBgn0038468	45.1813	-1.81309	0.656139	-2.76327	0.00572262	0.0197395
FBgn0034452	121.972	-1.81099	0.475839	-3.80588	0.000141298	0.000832384
FBgn0038880	28.4842	-1.80782	0.681236	-2.65373	0.00796072	0.0261406
FBgn0028999	812.041	-1.80714	0.728674	-2.48004	0.0131369	0.039661
FBgn0263072	780.256	-1.8056	0.671944	-2.68714	0.00720678	0.0240842
FBgn0003255	82.4363	-1.80029	0.525129	-3.42829	0.000607403	0.00296465
FBgn0259168	3025.67	-1.79518	0.268369	-6.68924	2.24338e-11	5.18776e-10
FBgn0035245	122.839	-1.79104	0.452271	-3.9601	7.49171e-05	0.000476975
FBgn0036360	169.757	-1.78773	0.51533	-3.46909	0.000522226	0.00260589
FBgn0263005	705.784	-1.78413	0.291183	-6.12717	8.94556e-10	1.62536e-08
FBgn0035995	2677.06	-1.78239	0.274142	-6.5017	7.94188e-11	1.73044e-09
FBgn0036790	35.733	-1.78192	0.632485	-2.81733	0.00484252	0.0171805
FBgn0037107	69.0503	-1.77595	0.737396	-2.40841	0.016022	0.0465838
FBgn0033439	644.866	-1.77517	0.408124	-4.34958	1.36398e-05	0.000105885
FBgn0053062	73.3312	-1.77383	0.529177	-3.35205	0.000802144	0.00376722
FBgn0086675	492.049	-1.77374	0.721356	-2.4589	0.0139364	0.0416151
FBgn0039734	239.198	-1.77371	0.490073	-3.61928	0.000295426	0.00159571
FBgn0013275	743.663	-1.77034	0.682048	-2.59563	0.00944178	0.0301883
FBgn0031516	803.131	-1.76958	0.264106	-6.70028	2.08015e-11	4.85131e-10
FBgn0032705	380.496	-1.7694	0.40139	-4.40819	1.0424e-05	8.31636e-05
FBgn0026404	2191.92	-1.76863	0.301614	-5.86388	4.52168e-09	7.15747e-08
FBgn0053993	169.6	-1.76644	0.518208	-3.40874	0.000652629	0.00315582
FBgn0029913	520.889	-1.76546	0.313905	-5.62419	1.86383e-08	2.66144e-07
FBgn0035620	540.244	-1.76507	0.418869	-4.2139	2.51001e-05	0.00018303
FBgn0031351	97.9227	-1.76421	0.435769	-4.04849	5.15488e-05	0.000343387
FBgn0283651	206.311	-1.76406	0.567989	-3.1058	0.00189762	0.00782662
FBgn0004872	26.2563	-1.76029	0.66398	-2.65111	0.0080227	0.0262968
FBgn0034451	411.407	-1.75812	0.374214	-4.69817	2.62501e-06	2.42503e-05
FBgn0004619	76.2971	-1.75522	0.720807	-2.43507	0.0148888	0.0438721
FBgn0243486	475.551	-1.74742	0.318168	-5.49213	3.97105e-08	5.39334e-07
FBgn0053527	42.5895	-1.74728	0.659722	-2.64851	0.00808476	0.0264764
FBgn0013276	746.552	-1.74572	0.70376	-2.48056	0.0131176	0.0396244
FBgn0265276	2545.62	-1.74444	0.603214	-2.89191	0.00382902	0.0142358
FBgn0041156	88.8659	-1.74413	0.600505	-2.90444	0.00367912	0.0137674
FBgn0283741	2189.15	-1.74391	0.286125	-6.09492	1.09492e-09	1.9442e-08
FBgn0033467	26.3769	-1.74286	0.644358	-2.70479	0.00683468	0.0229671
FBgn0039449	101.863	-1.74143	0.539104	-3.23023	0.00123693	0.00546426
FBgn0039593	944.943	-1.74062	0.282786	-6.15525	7.49588e-10	1.37798e-08
FBgn0014427	1892.72	-1.7406	0.252128	-6.90363	5.06898e-12	1.26875e-10
FBgn0038302	248.903	-1.73884	0.338664	-5.1344	2.83046e-07	3.25206e-06
FBgn0037167	214.592	-1.73764	0.381914	-4.5498	5.36958e-06	4.57062e-05
FBgn0036196	1542.34	-1.73629	0.238253	-7.28756	3.15619e-13	9.61626e-12
FBgn0030357	3132.96	-1.73477	0.476568	-3.64013	0.000272497	0.00148731
FBgn0262858	31.2481	-1.73347	0.724248	-2.39348	0.0166896	0.0481791
FBgn0010300	3241.63	-1.72868	0.421443	-4.10182	4.0992e-05	0.000282172
FBgn0029823	11372.6	-1.72759	0.247565	-6.97832	2.98735e-12	7.70652e-11
FBgn0030555	785.958	-1.72454	0.288205	-5.98373	2.18079e-09	3.68678e-08
FBgn0000241	383.179	-1.72174	0.45758	-3.7627	0.000168088	0.000965119
FBgn0030098	17508.8	-1.71954	0.433387	-3.96767	7.25773e-05	0.000463427
FBgn0036843	2212.31	-1.71876	0.313648	-5.4799	4.25575e-08	5.74684e-07
FBgn0287696	268.17	-1.7172	0.416022	-4.12767	3.66463e-05	0.000255866
FBgn0025676	201.781	-1.71615	0.437321	-3.92424	8.70031e-05	0.000546291
FBgn0032474	3067.26	-1.71445	0.280538	-6.11129	9.88294e-10	1.78088e-08
FBgn0038581	72.4423	-1.71394	0.663367	-2.5837	0.00977472	0.0310621
FBgn0051463	121.456	-1.71158	0.630506	-2.71461	0.00663532	0.0224211
FBgn0004863	152.31	-1.70595	0.36814	-4.63396	3.5873e-06	3.2054e-05
FBgn0031632	613.998	-1.70553	0.416005	-4.09978	4.13543e-05	0.000284308
FBgn0030927	326.485	-1.70546	0.356769	-4.7803	1.75037e-06	1.6913e-05
FBgn0032741	358.015	-1.70192	0.518252	-3.28396	0.00102361	0.00461509
FBgn0262148	346.643	-1.69774	0.327807	-5.17908	2.22988e-07	2.59749e-06
FBgn0030189	453.007	-1.69543	0.35176	-4.81985	1.43669e-06	1.41191e-05
FBgn0030542	84.2024	-1.69541	0.528861	-3.20579	0.00134694	0.00585798
FBgn0031568	201.575	-1.69279	0.58491	-2.8941	0.00380248	0.014166
FBgn0288690	63.4376	-1.69209	0.490763	-3.44787	0.000565033	0.0027877
FBgn0051044	166.484	-1.69188	0.357735	-4.72941	2.25169e-06	2.12869e-05
FBgn0037370	6056.95	-1.6898	0.358501	-4.71351	2.43491e-06	2.27438e-05
FBgn0262737	2641.85	-1.6882	0.402371	-4.19564	2.72106e-05	0.000196975
FBgn0035194	319.509	-1.6853	0.338563	-4.97781	6.43091e-07	6.86256e-06
FBgn0030274	2031.81	-1.68513	0.246431	-6.83814	8.0229e-12	1.96319e-10
FBgn0039128	84.4207	-1.68501	0.564247	-2.9863	0.00282378	0.0110191
FBgn0037021	1613.88	-1.68403	0.336912	-4.99843	5.77987e-07	6.22247e-06
FBgn0250836	3068.96	-1.68393	0.430632	-3.91037	9.2156e-05	0.000575016
FBgn0261046	168.341	-1.68368	0.65814	-2.55824	0.0105204	0.0330666
FBgn0013717	1125.28	-1.68078	0.250719	-6.70382	2.03036e-11	4.75548e-10
FBgn0039632	2131.51	-1.67814	0.246888	-6.79715	1.06707e-11	2.57651e-10
FBgn0036641	760.33	-1.67706	0.362698	-4.62386	3.7667e-06	3.34689e-05
FBgn0035956	168.25	-1.67688	0.383476	-4.37283	1.22645e-05	9.6164e-05
FBgn0017590	345.578	-1.67523	0.581636	-2.8802	0.00397423	0.0146795
FBgn0002673	63.0446	-1.67276	0.544272	-3.07338	0.00211646	0.00858674
FBgn0052039	683.612	-1.67161	0.328713	-5.08534	3.66973e-07	4.09587e-06
FBgn0261278	2564.9	-1.67015	0.326811	-5.11044	3.21416e-07	3.63938e-06
FBgn0046258	1008.77	-1.66894	0.335352	-4.97668	6.46837e-07	6.8891e-06
FBgn0033911	185.686	-1.66796	0.610647	-2.73146	0.00630549	0.0214524
FBgn0034612	631.648	-1.66609	0.475869	-3.50115	0.000463248	0.00235894
FBgn0261086	61.8909	-1.66603	0.673173	-2.47489	0.0133276	0.0400927
FBgn0034217	71.3551	-1.65709	0.470313	-3.52338	0.000426079	0.00219522
FBgn0033438	293.641	-1.65589	0.464199	-3.5672	0.000360817	0.00190382
FBgn0032100	71.6878	-1.654	0.591443	-2.79655	0.00516515	0.0181544
FBgn0008646	474.527	-1.65397	0.299778	-5.51731	3.44232e-08	4.74207e-07
FBgn0004108	1639.91	-1.65102	0.460217	-3.58747	0.000333902	0.00177551
FBgn0262733	574.063	-1.64942	0.473072	-3.48661	0.000489184	0.00247031
FBgn0002901	140.565	-1.64923	0.371778	-4.43607	9.16154e-06	7.40642e-05
FBgn0038332	124.789	-1.6483	0.422853	-3.89805	9.69716e-05	0.000602315
FBgn0029955	159.379	-1.64405	0.501481	-3.27838	0.00104405	0.00469952
FBgn0051875	56.0075	-1.64331	0.498455	-3.2968	0.000977915	0.00443652
FBgn0032921	241.529	-1.6424	0.446698	-3.67675	0.000236226	0.00130827
FBgn0034397	163.739	-1.64226	0.520391	-3.15582	0.00160047	0.00677737
FBgn0030673	177.885	-1.63457	0.33891	-4.82302	1.41403e-06	1.39214e-05
FBgn0287185	118.056	-1.63447	0.468615	-3.48788	0.000486864	0.00246087
FBgn0030607	469.713	-1.62989	0.354562	-4.5969	4.28823e-06	3.7614e-05
FBgn0031424	452.305	-1.6296	0.605006	-2.69353	0.00707005	0.023678
FBgn0032447	91.3725	-1.62562	0.457097	-3.55641	0.000375964	0.00197232
FBgn0262481	163.209	-1.62411	0.40793	-3.98134	6.85286e-05	0.000440662
FBgn0037661	76.9096	-1.62055	0.452102	-3.58447	0.000337764	0.0017943
FBgn0000157	499.612	-1.61897	0.636404	-2.54393	0.0109613	0.0342114
FBgn0010309	405.162	-1.618	0.356719	-4.53578	5.73911e-06	4.85785e-05
FBgn0029003	2365.82	-1.617	0.36893	-4.38296	1.1708e-05	9.23967e-05
FBgn0031894	171.933	-1.61449	0.488836	-3.30271	0.000957541	0.00435855
FBgn0000405	1521.82	-1.61014	0.419402	-3.83914	0.000123467	0.000739593
FBgn0036227	13404.9	-1.60737	0.298348	-5.38758	7.14121e-08	9.21115e-07
FBgn0035260	304.57	-1.60428	0.376674	-4.25907	2.05278e-05	0.000153161
FBgn0029863	267.899	-1.60102	0.37544	-4.26438	2.00457e-05	0.000150178
FBgn0052532	64.7955	-1.59988	0.59231	-2.70109	0.00691133	0.0232032
FBgn0030806	431.505	-1.59958	0.410073	-3.90072	9.59085e-05	0.00059605
FBgn0003513	113.09	-1.59733	0.54006	-2.95769	0.00309956	0.0118875
FBgn0036516	3647.01	-1.5958	0.225006	-7.09225	1.31953e-12	3.60827e-11
FBgn0034914	11482.9	-1.5954	0.256784	-6.21299	5.19863e-10	9.77021e-09
FBgn0003204	6271.84	-1.59426	0.244439	-6.52213	6.93167e-11	1.52246e-09
FBgn0034903	2920.39	-1.59325	0.423105	-3.76562	0.000166134	0.000956408
FBgn0039584	112.041	-1.59213	0.661217	-2.40787	0.0160458	0.0466284
FBgn0038540	67.5606	-1.59154	0.520469	-3.0579	0.00222894	0.00899304
FBgn0052194	78.7996	-1.59057	0.54097	-2.94021	0.00327985	0.0124956
FBgn0003068	72.658	-1.59042	0.55453	-2.86806	0.00413001	0.0150882
FBgn0028434	72.9155	-1.59035	0.547388	-2.90534	0.00366859	0.0137374
FBgn0034430	644.161	-1.58882	0.331063	-4.79916	1.59333e-06	1.55605e-05
FBgn0027589	83.2248	-1.58719	0.464951	-3.41368	0.00064092	0.00310469
FBgn0034816	73.9617	-1.58542	0.631074	-2.51227	0.0119959	0.0367332
FBgn0266884	50.5005	-1.58481	0.638099	-2.48365	0.0130044	0.039337
FBgn0032813	131.272	-1.5827	0.461282	-3.43108	0.00060119	0.00293826
FBgn0003227	175.409	-1.58098	0.367749	-4.29908	1.71506e-05	0.000130545
FBgn0037746	440.188	-1.57931	0.435462	-3.62675	0.00028701	0.00155875
FBgn0001084	248.499	-1.57696	0.462417	-3.41026	0.00064902	0.00313975
FBgn0033927	12203.7	-1.57331	0.264101	-5.95723	2.56543e-09	4.29062e-08
FBgn0035210	188.799	-1.57326	0.460539	-3.41613	0.000635186	0.003081
FBgn0034788	126.966	-1.57306	0.467446	-3.36523	0.000764795	0.00361666
FBgn0039809	745.996	-1.57272	0.257944	-6.09716	1.07971e-09	1.92908e-08
FBgn0037553	551.526	-1.57125	0.266695	-5.89155	3.82585e-09	6.15399e-08
FBgn0051646	45.2622	-1.57119	0.602667	-2.60707	0.00913214	0.02937
FBgn0261649	483.332	-1.56969	0.649199	-2.41789	0.0156108	0.0455945
FBgn0031540	259.81	-1.56902	0.294588	-5.32617	1.00306e-07	1.26462e-06
FBgn0039530	178.455	-1.56855	0.592882	-2.64564	0.00815369	0.0266622
FBgn0037980	381.051	-1.56685	0.307756	-5.0912	3.55808e-07	3.98345e-06
FBgn0000577	342.216	-1.56635	0.41283	-3.79418	0.000148134	0.000865472
FBgn0039742	586.451	-1.56472	0.407509	-3.83971	0.000123178	0.00073866
FBgn0013753	1174.19	-1.55985	0.28616	-5.45095	5.01019e-08	6.65874e-07
FBgn0038498	180.796	-1.55935	0.424105	-3.67681	0.00023617	0.00130827
FBgn0263113	59.8486	-1.55875	0.600892	-2.59407	0.00948472	0.0302813
FBgn0037710	1213.09	-1.55773	0.267946	-5.8136	6.11417e-09	9.44657e-08
FBgn0261710	13097.2	-1.55711	0.365233	-4.26335	2.01384e-05	0.00015077
FBgn0051793	1165.39	-1.55299	0.333084	-4.66245	3.12473e-06	2.83402e-05
FBgn0036289	108.052	-1.55254	0.46718	-3.32322	0.000889842	0.00409814
FBgn0011592	853.067	-1.55149	0.470622	-3.29668	0.00097834	0.0044366
FBgn0002023	180.915	-1.55142	0.574876	-2.69871	0.00696093	0.0233554
FBgn0035065	745.891	-1.55064	0.263732	-5.87962	4.1122e-09	6.57591e-08
FBgn0000024	724.163	-1.54969	0.292443	-5.29912	1.16364e-07	1.43818e-06
FBgn0036975	829.326	-1.54752	0.368238	-4.20251	2.63976e-05	0.00019147
FBgn0023143	16934.5	-1.54597	0.296746	-5.20975	1.891e-07	2.24093e-06
FBgn0032022	390.643	-1.54523	0.393594	-3.92594	8.6391e-05	0.000543209
FBgn0038053	2092.31	-1.54445	0.29972	-5.153	2.56356e-07	2.96408e-06
FBgn0030768	756.531	-1.54408	0.257868	-5.98788	2.12597e-09	3.61084e-08
FBgn0032405	314.948	-1.54362	0.328668	-4.69658	2.64554e-06	2.43782e-05
FBgn0000964	49.694	-1.54299	0.630059	-2.44896	0.0143269	0.0425953
FBgn0033273	171.479	-1.54134	0.326762	-4.71702	2.39327e-06	2.2454e-05
FBgn0032467	7327.18	-1.54049	0.248621	-6.19615	5.78613e-10	1.07817e-08
FBgn0000591	263.481	-1.54003	0.585002	-2.63252	0.00847537	0.0275494
FBgn0031909	354.551	-1.53948	0.34316	-4.48618	7.25123e-06	6.01775e-05
FBgn0026263	330.89	-1.53884	0.534737	-2.87776	0.00400511	0.0147551
FBgn0004832	364.092	-1.53797	0.339968	-4.52385	6.07235e-06	5.10919e-05
FBgn0029835	808.612	-1.53502	0.379508	-4.04477	5.23735e-05	0.000348032
FBgn0266549	318.123	-1.53385	0.61825	-2.48096	0.0131029	0.039591
FBgn0031769	3522.73	-1.53162	0.379322	-4.03778	5.39585e-05	0.000357441
FBgn0285991	11330.7	-1.53002	0.379446	-4.03226	5.52435e-05	0.000363789
FBgn0031463	33.3423	-1.52952	0.634401	-2.41097	0.0159101	0.0463078
FBgn0260971	64.5983	-1.52559	0.617229	-2.47168	0.0134479	0.0404212
FBgn0037065	2351.06	-1.52148	0.356715	-4.26525	1.99678e-05	0.000149697
FBgn0036696	112.59	-1.52093	0.455579	-3.33844	0.000842488	0.00392133
FBgn0030653	5878.37	-1.51825	0.256162	-5.92693	3.08656e-09	5.06919e-08
FBgn0028481	498.819	-1.51361	0.462083	-3.27563	0.00105427	0.00474356
FBgn0033627	562.71	-1.51314	0.418715	-3.61377	0.000301774	0.00162281
FBgn0260226	55883.1	-1.5125	0.447608	-3.37908	0.000727278	0.0034632
FBgn0050096	97.002	-1.50969	0.402889	-3.74717	0.00017884	0.00101671
FBgn0040348	180.848	-1.50942	0.502085	-3.00629	0.00264453	0.0104388
FBgn0030803	307.314	-1.50742	0.298344	-5.05262	4.35792e-07	4.8197e-06
FBgn0259791	126.634	-1.50635	0.394928	-3.81425	0.000136595	0.000807173
FBgn0000524	1463.85	-1.50552	0.324011	-4.6465	3.3761e-06	3.02191e-05
FBgn0266100	406.984	-1.50275	0.432339	-3.47585	0.000509236	0.00255038
FBgn0028343	3462.04	-1.50046	0.242725	-6.18175	6.33936e-10	1.17358e-08
FBgn0046296	73.8631	-1.49812	0.454039	-3.29954	0.000968433	0.0044008
FBgn0035146	673.097	-1.49753	0.326841	-4.58183	4.60925e-06	3.9981e-05
FBgn0031037	20711	-1.49564	0.312066	-4.7927	1.64552e-06	1.59988e-05
FBgn0085256	92473.3	-1.49377	0.551976	-2.70623	0.00680524	0.0229033
FBgn0265575	1696.14	-1.49353	0.362357	-4.12171	3.76072e-05	0.00026121
FBgn0013684	14689.8	-1.4906	0.340075	-4.38315	1.16975e-05	9.23808e-05
FBgn0262850	148.333	-1.48938	0.371843	-4.00541	6.19102e-05	0.000402361
FBgn0023181	441.308	-1.48593	0.301164	-4.93395	8.05838e-07	8.42663e-06
FBgn0031490	247.845	-1.48555	0.534461	-2.77954	0.00544366	0.0189446
FBgn0028980	487.5	-1.48539	0.362277	-4.10015	4.12875e-05	0.000284027
FBgn0037323	125.418	-1.48462	0.460388	-3.22471	0.00126102	0.00554829
FBgn0267228	175.712	-1.48436	0.474893	-3.12568	0.00177397	0.00741097
FBgn0000404	1534.41	-1.48389	0.360813	-4.11264	3.91166e-05	0.000270625
FBgn0033429	235.779	-1.48181	0.410463	-3.61011	0.000306071	0.0016443
FBgn0034403	144.026	-1.48111	0.606936	-2.4403	0.014675	0.0433591
FBgn0086558	39812.8	-1.47905	0.232429	-6.36345	1.97276e-10	3.96654e-09
FBgn0030660	181.497	-1.47838	0.496506	-2.97756	0.00290551	0.0112697
FBgn0003358	1514.82	-1.47811	0.534275	-2.76657	0.00566501	0.019584
FBgn0288856	672.63	-1.47577	0.296663	-4.97457	6.53918e-07	6.95097e-06
FBgn0002629	302.701	-1.47468	0.571658	-2.57966	0.00988964	0.0313818
FBgn0036395	142.239	-1.47392	0.445367	-3.30946	0.000934763	0.00427622
FBgn0052105	99.4176	-1.47377	0.512008	-2.87842	0.00399676	0.0147343
FBgn0050010	129.957	-1.47104	0.429805	-3.42258	0.000620289	0.0030208
FBgn0028931	93.7307	-1.46599	0.408674	-3.58719	0.000334256	0.00177653
FBgn0037802	173.932	-1.46081	0.336417	-4.34226	1.41026e-05	0.000109091
FBgn0039355	59.6964	-1.45726	0.569839	-2.55731	0.0105484	0.0331356
FBgn0030057	190.646	-1.45704	0.450488	-3.23436	0.00121917	0.00539235
FBgn0031161	1189.16	-1.4562	0.241751	-6.02355	1.70629e-09	2.93912e-08
FBgn0039073	987.878	-1.45556	0.249075	-5.84384	5.10095e-09	8.00491e-08
FBgn0038110	934.97	-1.45431	0.299386	-4.85765	1.18788e-06	1.19202e-05
FBgn0031252	212.503	-1.45408	0.55425	-2.62351	0.00870297	0.0281636
FBgn0046225	352.634	-1.45328	0.316275	-4.595	4.32744e-06	3.78365e-05
FBgn0035370	6393.41	-1.45264	0.328682	-4.41959	9.8889e-06	7.92416e-05
FBgn0036493	3739.6	-1.45188	0.388225	-3.73979	0.000184172	0.00104323
FBgn0031968	644.014	-1.45176	0.35225	-4.12139	3.76601e-05	0.000261375
FBgn0015572	393.609	-1.45162	0.300916	-4.824	1.40708e-06	1.38779e-05
FBgn0024958	3153.42	-1.44894	0.296627	-4.88473	1.03572e-06	1.05469e-05
FBgn0033320	1556.54	-1.44877	0.35896	-4.036	5.43692e-05	0.000359546
FBgn0016697	5883.9	-1.44646	0.353106	-4.09639	4.19642e-05	0.000287958
FBgn0004362	11523.3	-1.44536	0.380218	-3.80141	0.000143875	0.000844263
FBgn0013972	296.403	-1.44511	0.502145	-2.87787	0.00400364	0.0147547
FBgn0034756	541.337	-1.44397	0.282504	-5.11135	3.19869e-07	3.62562e-06
FBgn0040250	154.827	-1.44272	0.413888	-3.48578	0.000490702	0.00247579
FBgn0003997	411.323	-1.44092	0.522234	-2.75914	0.00579535	0.0199213
FBgn0039638	164.305	-1.43959	0.410731	-3.50495	0.000456695	0.00233318
FBgn0031403	243.202	-1.43835	0.406864	-3.53521	0.000407458	0.00211623
FBgn0250839	201.225	-1.43689	0.454201	-3.16356	0.00155855	0.00663323
FBgn0037635	1235.2	-1.43539	0.340869	-4.21099	2.54257e-05	0.000185034
FBgn0004811	1122.07	-1.43486	0.242541	-5.91594	3.29981e-09	5.38706e-08
FBgn0033901	1256.37	-1.43425	0.355509	-4.03435	5.47532e-05	0.000360995
FBgn0259241	114.847	-1.43405	0.548055	-2.61662	0.00888046	0.0286617
FBgn0004102	168.714	-1.43308	0.458276	-3.12712	0.00176529	0.007381
FBgn0015282	8118.32	-1.43255	0.278416	-5.14535	2.67017e-07	3.07759e-06
FBgn0262524	250.047	-1.43246	0.359674	-3.98267	6.81463e-05	0.000438978
FBgn0026876	427.562	-1.4324	0.381704	-3.75265	0.000174974	0.000999409
FBgn0027513	167.062	-1.43197	0.362033	-3.95535	7.64227e-05	0.000485713
FBgn0031574	264.19	-1.43141	0.528708	-2.70738	0.00678165	0.0228309
FBgn0028691	5316.33	-1.4303	0.27397	-5.22065	1.78292e-07	2.12204e-06
FBgn0037849	326.646	-1.43002	0.398357	-3.58981	0.000330923	0.00176224
FBgn0000568	6322.72	-1.42971	0.337124	-4.2409	2.2263e-05	0.000164981
FBgn0035254	237.677	-1.42877	0.319833	-4.46724	7.92359e-06	6.49742e-05
FBgn0035033	1282.47	-1.42821	0.30405	-4.69729	2.63632e-06	2.43167e-05
FBgn0027550	300.539	-1.42619	0.421692	-3.38205	0.000719458	0.00342895
FBgn0031518	70.8303	-1.42416	0.522852	-2.72384	0.0064528	0.0219047
FBgn0000504	406.53	-1.42306	0.376994	-3.77475	0.000160171	0.000925
FBgn0033301	288.327	-1.42298	0.4556	-3.1233	0.00178833	0.00744603
FBgn0025625	550.103	-1.41935	0.481187	-2.94968	0.00318103	0.0121573
FBgn0032105	577.528	-1.41925	0.394104	-3.6012	0.000316753	0.00169089
FBgn0031270	203.41	-1.41707	0.385225	-3.67854	0.000234577	0.00130112
FBgn0033926	62211.1	-1.41598	0.252133	-5.616	1.9543e-08	2.77973e-07
FBgn0024975	168.706	-1.4149	0.386903	-3.657	0.000255188	0.00140264
FBgn0069913	45.0337	-1.41111	0.565189	-2.4967	0.0125355	0.0381401
FBgn0287218	79.4263	-1.411	0.566479	-2.49082	0.0127449	0.038691
FBgn0030666	253.829	-1.41073	0.49203	-2.86716	0.0041417	0.0151208
FBgn0037897	2289.82	-1.40913	0.280388	-5.02563	5.01774e-07	5.48292e-06
FBgn0052856	141.387	-1.40844	0.460305	-3.05981	0.0022148	0.00894012
FBgn0036890	143.697	-1.40739	0.511259	-2.75279	0.00590896	0.0202545
FBgn0000546	3912.62	-1.40577	0.370107	-3.79828	0.000145706	0.000853176
FBgn0025574	1707.44	-1.40569	0.31383	-4.47913	7.49462e-06	6.20049e-05
FBgn0026411	287.199	-1.4053	0.486509	-2.88853	0.00387042	0.0143507
FBgn0002525	6314.69	-1.40127	0.299557	-4.6778	2.89967e-06	2.64967e-05
FBgn0004687	8807.66	-1.39962	0.263503	-5.31158	1.08679e-07	1.35391e-06
FBgn0015926	202.13	-1.39918	0.514031	-2.72198	0.00648916	0.0219952
FBgn0041723	282.673	-1.39555	0.511558	-2.72803	0.00637137	0.0216563
FBgn0004839	443.354	-1.39524	0.464979	-3.00066	0.00269398	0.010611
FBgn0025111	94.4304	-1.39435	0.452085	-3.08426	0.00204061	0.00832531
FBgn0032848	440.994	-1.394	0.345433	-4.03552	5.4482e-05	0.000360036
FBgn0033139	263.898	-1.39322	0.377375	-3.69187	0.000222615	0.0012417
FBgn0036364	1911.13	-1.39288	0.336625	-4.13778	3.50677e-05	0.000246194
FBgn0031081	1020.37	-1.39275	0.345436	-4.03185	5.53396e-05	0.000364203
FBgn0032822	138.227	-1.3925	0.360218	-3.86572	0.00011076	0.000671931
FBgn0284084	254.714	-1.39244	0.404958	-3.43849	0.000584967	0.00286604
FBgn0259785	3173.56	-1.39118	0.274923	-5.06026	4.18691e-07	4.63997e-06
FBgn0283649	627.476	-1.38892	0.310385	-4.47483	7.6472e-06	6.30332e-05
FBgn0266354	223.57	-1.38871	0.427368	-3.24944	0.00115631	0.0051539
FBgn0265186	801.09	-1.38354	0.523903	-2.64083	0.00827023	0.0269868
FBgn0010398	217.729	-1.38262	0.396478	-3.48727	0.000487984	0.00246539
FBgn0033949	1692.08	-1.38023	0.311787	-4.42683	9.56281e-06	7.70236e-05
FBgn0030012	311.672	-1.38005	0.347089	-3.97606	7.00659e-05	0.000449227
FBgn0033268	10596.7	-1.37985	0.490273	-2.81445	0.00488605	0.0173125
FBgn0050419	136.095	-1.37936	0.543723	-2.53689	0.0111842	0.0347439
FBgn0037238	73.8565	-1.37909	0.57887	-2.38239	0.0172008	0.0494331
FBgn0026085	107.106	-1.37784	0.420664	-3.27538	0.00105519	0.00474576
FBgn0021768	541.454	-1.37767	0.340008	-4.05186	5.08117e-05	0.000339303
FBgn0030034	2959.61	-1.37697	0.330613	-4.1649	3.11491e-05	0.000222362
FBgn0039642	560.521	-1.37657	0.354676	-3.88121	0.00010394	0.000636558
FBgn0037976	265.852	-1.37618	0.575	-2.39336	0.0166948	0.0481814
FBgn0000351	38.9241	-1.37492	0.562538	-2.44413	0.0145202	0.043053
FBgn0262952	27093.8	-1.37436	0.262094	-5.24376	1.57338e-07	1.90583e-06
FBgn0028693	5165.65	-1.37093	0.300972	-4.555	5.23854e-06	4.48e-05
FBgn0036363	239.224	-1.37071	0.47164	-2.90627	0.00365765	0.0137012
FBgn0020307	666.178	-1.36963	0.415533	-3.29608	0.000980438	0.00444243
FBgn0037149	196.556	-1.36648	0.457076	-2.9896	0.00279345	0.0109219
FBgn0035159	120.45	-1.36611	0.40345	-3.38607	0.000709014	0.00338856
FBgn0264089	2108.31	-1.36438	0.409893	-3.32863	0.00087275	0.0040302
FBgn0031560	3802.5	-1.36351	0.422337	-3.2285	0.00124442	0.00549292
FBgn0004374	572.326	-1.36161	0.328607	-4.14359	3.41912e-05	0.000241065
FBgn0002707	269.478	-1.3615	0.384495	-3.541	0.000398613	0.00207621
FBgn0033582	301.812	-1.36141	0.352277	-3.86459	0.000111277	0.000674694
FBgn0035120	275.463	-1.3588	0.411279	-3.30383	0.000953735	0.00434665
FBgn0032935	1630.92	-1.35829	0.289991	-4.6839	2.81465e-06	2.57629e-05
FBgn0040388	1001.88	-1.35758	0.333026	-4.07649	4.57198e-05	0.000310225
FBgn0033638	4749.94	-1.35582	0.317608	-4.26883	1.96502e-05	0.000147417
FBgn0267428	1564.44	-1.35451	0.283057	-4.7853	1.70733e-06	1.6541e-05
FBgn0024732	250.21	-1.35377	0.35263	-3.83905	0.000123509	0.000739593
FBgn0030928	1064.72	-1.35318	0.449474	-3.01059	0.00260741	0.0103146
FBgn0003401	103.159	-1.35083	0.413604	-3.266	0.00109079	0.00488778
FBgn0035295	380.717	-1.35063	0.31376	-4.30465	1.67249e-05	0.000127482
FBgn0032884	2463.19	-1.34966	0.367402	-3.67353	0.000239218	0.00132217
FBgn0029999	563.163	-1.34951	0.330594	-4.08207	4.46367e-05	0.000304007
FBgn0028372	314.746	-1.34924	0.312177	-4.32202	1.54609e-05	0.000118343
FBgn0264816	205.989	-1.34907	0.402788	-3.34932	0.000810106	0.00379972
FBgn0260862	186.812	-1.34902	0.479042	-2.81609	0.00486126	0.0172414
FBgn0033654	983.508	-1.34896	0.302279	-4.46264	8.0957e-06	6.6231e-05
FBgn0035267	715.296	-1.34747	0.455554	-2.95787	0.00309769	0.0118845
FBgn0030930	5329.61	-1.34743	0.419457	-3.21233	0.00131664	0.00574057
FBgn0027611	4731.73	-1.34698	0.393391	-3.42403	0.000617004	0.00300748
FBgn0037882	310.088	-1.34692	0.305212	-4.41308	1.01909e-05	8.14824e-05
FBgn0011020	427.1	-1.34636	0.447058	-3.01161	0.00259869	0.0102913
FBgn0035449	1302.13	-1.34613	0.313408	-4.29513	1.74589e-05	0.000132707
FBgn0039407	149.861	-1.34601	0.37786	-3.56219	0.000367771	0.00193491
FBgn0002899	210.615	-1.3456	0.42875	-3.13842	0.00169858	0.00713484
FBgn0031091	199.087	-1.34498	0.418646	-3.21269	0.00131499	0.00573729
FBgn0033054	127.967	-1.34431	0.562257	-2.39092	0.0168062	0.0484137
FBgn0028582	6516.25	-1.34366	0.346595	-3.87673	0.000105869	0.000647286
FBgn0003480	56.9871	-1.34318	0.531459	-2.52734	0.0114929	0.0354711
FBgn0030029	304.264	-1.34304	0.417344	-3.21807	0.00129057	0.00565327
FBgn0022893	21908.1	-1.3415	0.339713	-3.94891	7.85082e-05	0.000498099
FBgn0030082	1231.96	-1.3415	0.309257	-4.3378	1.43918e-05	0.000111171
FBgn0243513	109.738	-1.34013	0.382886	-3.50009	0.000465108	0.00236653
FBgn0037933	1665.82	-1.33986	0.296579	-4.51771	6.25135e-06	5.24365e-05
FBgn0040493	7705.36	-1.3384	0.247249	-5.41315	6.1924e-08	8.09229e-07
FBgn0039479	105.162	-1.3377	0.517408	-2.58539	0.00972684	0.030946
FBgn0030959	905.053	-1.33753	0.262454	-5.09623	3.46482e-07	3.89098e-06
FBgn0001301	4262.17	-1.33455	0.310084	-4.30382	1.67878e-05	0.000127873
FBgn0003053	852.278	-1.33399	0.38411	-3.47293	0.000514805	0.00257238
FBgn0030447	964.297	-1.33328	0.290643	-4.58734	4.48931e-06	3.90956e-05
FBgn0067102	2032.16	-1.33323	0.345603	-3.8577	0.000114457	0.000690533
FBgn0039109	4026.54	-1.33292	0.245711	-5.42476	5.80327e-08	7.61105e-07
FBgn0038080	267.811	-1.33266	0.406923	-3.27498	0.00105671	0.00474896
FBgn0001086	618.247	-1.33239	0.420651	-3.16746	0.00153777	0.00656706
FBgn0259982	97.0904	-1.33239	0.457238	-2.91399	0.00356845	0.0134268
FBgn0033294	174.873	-1.33133	0.526506	-2.5286	0.0114517	0.0353938
FBgn0022943	378.333	-1.3304	0.327591	-4.06116	4.88301e-05	0.000328074
FBgn0004647	3156.61	-1.32984	0.425001	-3.12904	0.00175379	0.00733854
FBgn0035477	85.2519	-1.32958	0.462684	-2.87362	0.00405803	0.0148975
FBgn0037856	514.119	-1.32752	0.362182	-3.66535	0.000247002	0.00136175
FBgn0031183	843.823	-1.3268	0.253151	-5.24114	1.59585e-07	1.92877e-06
FBgn0005771	2882.68	-1.32654	0.233438	-5.6826	1.32665e-08	1.95039e-07
FBgn0044028	145.873	-1.32408	0.405221	-3.26755	0.00108481	0.00486498
FBgn0261068	590.793	-1.32292	0.403377	-3.27961	0.00103952	0.00468104
FBgn0002715	147.505	-1.3215	0.409352	-3.22828	0.00124535	0.00549483
FBgn0250755	207.474	-1.32146	0.313455	-4.21581	2.48887e-05	0.00018161
FBgn0261396	7053.58	-1.32084	0.263049	-5.02129	5.13265e-07	5.60289e-06
FBgn0036986	131.683	-1.31997	0.440018	-2.99981	0.00270146	0.0106366
FBgn0003944	688.246	-1.31959	0.373069	-3.53712	0.000404509	0.00210391
FBgn0031661	1443.53	-1.31922	0.289811	-4.55201	5.3136e-06	4.52649e-05
FBgn0032253	532.241	-1.31892	0.344284	-3.83092	0.000127664	0.000762219
FBgn0033313	11765.5	-1.31429	0.31014	-4.23774	2.25785e-05	0.000166755
FBgn0037739	659.946	-1.31283	0.347261	-3.78052	0.000156498	0.000907623
FBgn0286784	22404.7	-1.31044	0.275192	-4.7619	1.91781e-06	1.83525e-05
FBgn0030506	335.523	-1.31014	0.336416	-3.89441	9.84372e-05	0.000609341
FBgn0031053	537.255	-1.30903	0.44812	-2.92117	0.00348722	0.0131756
FBgn0000625	373.254	-1.30881	0.417518	-3.13473	0.00172012	0.00721422
FBgn0034913	1277.37	-1.30577	0.317415	-4.11378	3.8924e-05	0.000269463
FBgn0040281	360.507	-1.30566	0.459834	-2.83941	0.0045197	0.0162154
FBgn0032047	141.588	-1.30499	0.427941	-3.04945	0.00229257	0.00920902
FBgn0261801	405.491	-1.30483	0.354273	-3.6831	0.000230412	0.00128061
FBgn0010382	479.013	-1.3043	0.462005	-2.82314	0.00475562	0.0169216
FBgn0031766	137.839	-1.30352	0.368667	-3.53576	0.0004066	0.00211277
FBgn0002609	531.556	-1.29863	0.350239	-3.70783	0.000209043	0.00117017
FBgn0036332	104.837	-1.29748	0.513352	-2.52746	0.0114891	0.0354711
FBgn0262580	215.955	-1.29716	0.540949	-2.39794	0.0164876	0.047722
FBgn0034657	736.291	-1.29606	0.33571	-3.86065	0.000113088	0.000684458
FBgn0261675	324.24	-1.29461	0.524737	-2.46717	0.0136187	0.0408337
FBgn0287720	3784.75	-1.2945	0.302308	-4.28206	1.85172e-05	0.000139683
FBgn0004360	426.089	-1.29199	0.283687	-4.55427	5.2567e-06	4.48851e-05
FBgn0041627	560.679	-1.29047	0.352788	-3.65792	0.00025427	0.00139829
FBgn0034052	1139.1	-1.28819	0.326928	-3.94028	8.13872e-05	0.00051491
FBgn0262962	82.3102	-1.28812	0.446556	-2.88457	0.0039195	0.0145032
FBgn0038476	2774.82	-1.28584	0.335954	-3.82742	0.000129493	0.000771039
FBgn0042111	1237	-1.28491	0.272909	-4.7082	2.49909e-06	2.32441e-05
FBgn0086359	722.249	-1.2845	0.273525	-4.69609	2.65186e-06	2.44159e-05
FBgn0085377	585.201	-1.28238	0.314444	-4.07824	4.53773e-05	0.000308284
FBgn0029693	1223.58	-1.28099	0.322481	-3.97229	7.11837e-05	0.000455326
FBgn0030242	166.79	-1.27892	0.458014	-2.79233	0.00523305	0.018331
FBgn0032763	184.641	-1.27644	0.317238	-4.02361	5.73132e-05	0.000374935
FBgn0035703	288.538	-1.27627	0.334125	-3.81973	0.000133596	0.000792878
FBgn0030662	1622.08	-1.27599	0.294274	-4.33608	1.45049e-05	0.000111965
FBgn0031479	223.762	-1.27509	0.382307	-3.33526	0.000852208	0.00394977
FBgn0038820	989.534	-1.27482	0.351568	-3.6261	0.000287732	0.00156189
FBgn0032858	397.085	-1.27301	0.324262	-3.92588	8.64128e-05	0.000543209
FBgn0058160	1515.85	-1.27058	0.5007	-2.53761	0.0111611	0.0346956
FBgn0037007	10747.9	-1.26993	0.278559	-4.55892	5.14168e-06	4.41423e-05
FBgn0025578	4137.52	-1.26864	0.516661	-2.45546	0.0140703	0.0419233
FBgn0264339	107.807	-1.26607	0.499365	-2.53537	0.0112329	0.0348356
FBgn0266111	244.977	-1.26526	0.525594	-2.4073	0.016071	0.0466767
FBgn0033373	2204.37	-1.26147	0.258268	-4.88435	1.03771e-06	1.05488e-05
FBgn0035204	1358.45	-1.25981	0.357534	-3.52362	0.000425699	0.00219522
FBgn0035356	137.984	-1.25942	0.469716	-2.68123	0.0073352	0.0244462
FBgn0261270	2369.72	-1.25834	0.280572	-4.48491	7.29431e-06	6.04827e-05
FBgn0028688	6118.41	-1.2558	0.282939	-4.43842	9.06206e-06	7.33685e-05
FBgn0032923	1331.81	-1.25502	0.242604	-5.17314	2.30194e-07	2.67858e-06
FBgn0030710	251.341	-1.25475	0.494006	-2.53994	0.0110871	0.0345304
FBgn0052708	212.897	-1.2528	0.395545	-3.16727	0.0015388	0.00656706
FBgn0039663	94.1878	-1.25218	0.448208	-2.79374	0.00521018	0.0182599
FBgn0038490	91.3285	-1.25086	0.495481	-2.52453	0.0115854	0.0357161
FBgn0035754	334.641	-1.24846	0.342544	-3.64467	0.000267737	0.00146425
FBgn0034493	165.877	-1.24818	0.419874	-2.97275	0.00295141	0.0114274
FBgn0039136	2724.51	-1.24793	0.256575	-4.8638	1.15156e-06	1.16034e-05
FBgn0286788	343.38	-1.24764	0.40558	-3.07618	0.00209669	0.00851599
FBgn0026148	168.862	-1.24761	0.428062	-2.91456	0.00356195	0.0134116
FBgn0037941	97.9774	-1.24707	0.410113	-3.0408	0.00235948	0.00943963
FBgn0037592	2028.77	-1.24696	0.269186	-4.63234	3.61551e-06	3.22302e-05
FBgn0024542	457.612	-1.24485	0.322259	-3.86289	0.000112053	0.000678648
FBgn0037378	1230.25	-1.24285	0.342996	-3.62353	0.000290614	0.00157466
FBgn0032787	450.246	-1.24102	0.282936	-4.38623	1.15332e-05	9.12808e-05
FBgn0030457	662.986	-1.24005	0.256988	-4.82533	1.39769e-06	1.38063e-05
FBgn0032390	409.555	-1.23964	0.400959	-3.0917	0.00199012	0.00815691
FBgn0038202	134.585	-1.23953	0.469437	-2.64046	0.00827947	0.0270073
FBgn0052707	442.368	-1.23854	0.300423	-4.12265	3.74534e-05	0.000260436
FBgn0262570	779.608	-1.23841	0.331674	-3.73383	0.000188591	0.0010641
FBgn0030970	294.366	-1.23799	0.32551	-3.80323	0.000142823	0.000839441
FBgn0032635	504.633	-1.23798	0.36833	-3.36107	0.000776405	0.00366206
FBgn0010453	218.984	-1.2375	0.502935	-2.46056	0.0138721	0.0414572
FBgn0032726	7020.96	-1.2372	0.345202	-3.58398	0.000338393	0.00179677
FBgn0027864	141.322	-1.23714	0.438169	-2.82344	0.0047512	0.0169169
FBgn0260484	1507.23	-1.23708	0.301884	-4.09784	4.17014e-05	0.000286334
FBgn0025697	166.615	-1.23696	0.497654	-2.48558	0.0129339	0.039167
FBgn0025454	4806.18	-1.23685	0.387082	-3.19531	0.00139682	0.00604366
FBgn0031882	525.856	-1.23546	0.294708	-4.19217	2.76303e-05	0.000199249
FBgn0000233	146.779	-1.2345	0.504212	-2.44838	0.0143501	0.0426178
FBgn0004106	484.723	-1.2336	0.423926	-2.90993	0.00361513	0.0135634
FBgn0040477	84.29	-1.2308	0.466935	-2.63592	0.00839105	0.027329
FBgn0029866	1501.73	-1.23034	0.30192	-4.07506	4.60019e-05	0.00031156
FBgn0035692	1900.58	-1.22881	0.280705	-4.37758	1.20005e-05	9.4297e-05
FBgn0058439	468.322	-1.22757	0.325744	-3.76852	0.000164216	0.00094636
FBgn0250843	5614.84	-1.22723	0.299399	-4.09898	4.14976e-05	0.000285114
FBgn0039492	3772.45	-1.22702	0.309429	-3.96544	7.32594e-05	0.00046751
FBgn0035155	173.437	-1.22383	0.367436	-3.33073	0.00086618	0.00400773
FBgn0029526	89.2683	-1.22347	0.399696	-3.061	0.00220597	0.00891682
FBgn0030963	199.108	-1.2221	0.411363	-2.97085	0.00296976	0.0114863
FBgn0037031	292.025	-1.22153	0.302516	-4.03789	5.39342e-05	0.000357441
FBgn0031872	2175.47	-1.22042	0.297446	-4.10301	4.07814e-05	0.000281191
FBgn0029676	2758.86	-1.21949	0.274386	-4.44442	8.81295e-06	7.15635e-05
FBgn0011217	9729.84	-1.217	0.263217	-4.62358	3.77176e-06	3.34866e-05
FBgn0030571	438.865	-1.21635	0.277668	-4.3806	1.18355e-05	9.30673e-05
FBgn0267001	1750.69	-1.21557	0.471702	-2.57699	0.00996642	0.0315887
FBgn0027597	724.625	-1.21465	0.29184	-4.16204	3.15414e-05	0.00022461
FBgn0030329	5417.27	-1.21422	0.298117	-4.07295	4.64211e-05	0.000313816
FBgn0031603	492.542	-1.21405	0.318235	-3.81496	0.000136207	0.000805752
FBgn0039732	173.981	-1.21374	0.391829	-3.09764	0.00195068	0.00801223
FBgn0037760	1820.91	-1.21195	0.260046	-4.66053	3.15398e-06	2.85581e-05
FBgn0051950	182.237	-1.21088	0.345972	-3.49993	0.000465387	0.00236653
FBgn0036819	240.209	-1.21018	0.424427	-2.85133	0.00435369	0.0156976
FBgn0011291	429.831	-1.20996	0.275773	-4.38755	1.14637e-05	9.07963e-05
FBgn0284442	1172.23	-1.20809	0.384272	-3.14384	0.00166747	0.00702572
FBgn0038462	543.01	-1.20791	0.321406	-3.75822	0.000171125	0.000981281
FBgn0024993	189.621	-1.2078	0.361748	-3.33878	0.000841458	0.0039191
FBgn0035209	128.462	-1.20733	0.458271	-2.63453	0.00842545	0.0274034
FBgn0053554	5250.15	-1.20438	0.346101	-3.47985	0.000501695	0.00252185
FBgn0044020	636.188	-1.20236	0.305781	-3.93209	8.42091e-05	0.000531187
FBgn0028554	2458.81	-1.20201	0.324353	-3.70587	0.000210668	0.00117867
FBgn0015396	1056.28	-1.20196	0.496071	-2.42295	0.015395	0.0451086
FBgn0029914	1385.04	-1.20106	0.248066	-4.84169	1.28739e-06	1.28246e-05
FBgn0000492	608.927	-1.20096	0.350927	-3.42224	0.000621076	0.00302329
FBgn0051638	902.668	-1.2006	0.296267	-4.05244	5.06857e-05	0.000338668
FBgn0030864	419.999	-1.20012	0.318364	-3.76965	0.000163476	0.000942596
FBgn0034707	482.94	-1.19969	0.295366	-4.0617	4.87176e-05	0.000327519
FBgn0031420	1425.52	-1.19898	0.246516	-4.86371	1.15207e-06	1.16034e-05
FBgn0035619	533.232	-1.19737	0.375942	-3.18497	0.00144768	0.00623169
FBgn0035402	3318.85	-1.1959	0.255799	-4.67513	2.93764e-06	2.67989e-05
FBgn0039946	177.347	-1.19538	0.334095	-3.57795	0.000346295	0.00183598
FBgn0027287	5012.32	-1.19532	0.289163	-4.13373	3.56918e-05	0.000249934
FBgn0001269	793.615	-1.19488	0.325861	-3.66682	0.000245584	0.00135461
FBgn0031098	798.271	-1.19475	0.335871	-3.55716	0.00037488	0.00196758
FBgn0028897	84.5786	-1.19319	0.467715	-2.55111	0.010738	0.0336637
FBgn0040102	659.43	-1.19211	0.398726	-2.98979	0.00279171	0.0109212
FBgn0037186	1339.96	-1.1915	0.248489	-4.79499	1.62684e-06	1.58313e-05
FBgn0259992	171.788	-1.19121	0.383761	-3.10406	0.00190886	0.00786408
FBgn0043792	477.222	-1.19052	0.407074	-2.92459	0.00344911	0.0130496
FBgn0030944	1383.79	-1.18971	0.345909	-3.43938	0.000583038	0.00285848
FBgn0033484	939.398	-1.18865	0.44433	-2.67514	0.00746974	0.024819
FBgn0039269	744.19	-1.18571	0.349688	-3.39076	0.000696994	0.00334081
FBgn0039357	201.897	-1.1813	0.33964	-3.4781	0.000504976	0.00253563
FBgn0033793	83.1095	-1.18118	0.481452	-2.45336	0.0141527	0.0421574
FBgn0035839	392.54	-1.17908	0.350662	-3.36246	0.000772526	0.00364848
FBgn0032803	253.058	-1.17627	0.376865	-3.12119	0.0018012	0.00749393
FBgn0015519	634.627	-1.17414	0.30544	-3.84407	0.000121008	0.000726847
FBgn0036320	296.544	-1.17251	0.422608	-2.77446	0.00552937	0.0191818
FBgn0025832	307.272	-1.17154	0.349251	-3.35445	0.000795241	0.00373961
FBgn0002576	254.808	-1.17149	0.388591	-3.0147	0.00257233	0.0102017
FBgn0037550	349.316	-1.17141	0.332672	-3.52121	0.000429575	0.00221115
FBgn0029892	245.136	-1.17116	0.427125	-2.74197	0.00610723	0.0208688
FBgn0036836	177.95	-1.17095	0.439313	-2.6654	0.00768974	0.0254571
FBgn0025878	277.422	-1.1708	0.440799	-2.65609	0.0079053	0.0260055
FBgn0026239	2798.42	-1.16985	0.33965	-3.44429	0.000572558	0.00281974
FBgn0263934	1603.84	-1.16954	0.359838	-3.2502	0.00115324	0.00514235
FBgn0260945	1519.83	-1.16759	0.317045	-3.68274	0.000230743	0.0012818
FBgn0027608	731.897	-1.1663	0.35942	-3.24495	0.00117473	0.0052169
FBgn0030466	979.576	-1.16623	0.33	-3.53404	0.000409254	0.00212151
FBgn0037028	470.072	-1.1651	0.34183	-3.40843	0.000653375	0.00315803
FBgn0262719	1576.43	-1.16452	0.313354	-3.71629	0.000202166	0.00113633
FBgn0052676	5115.12	-1.1637	0.297396	-3.91298	9.11656e-05	0.000569485
FBgn0034013	872.331	-1.16279	0.383361	-3.03314	0.00242021	0.0096579
FBgn0263025	169.12	-1.16146	0.420857	-2.75976	0.00578442	0.0199025
FBgn0032225	110.323	-1.15955	0.485643	-2.38766	0.0169562	0.0487814
FBgn0038828	115.329	-1.15799	0.366104	-3.163	0.00156152	0.00664329
FBgn0011802	249.13	-1.15756	0.475151	-2.43619	0.0148428	0.0437721
FBgn0030654	205.081	-1.15696	0.356288	-3.24726	0.00116524	0.00518526
FBgn0029936	510.324	-1.15439	0.265051	-4.35535	1.32854e-05	0.000103649
FBgn0038055	492.658	-1.15341	0.284463	-4.05469	5.02002e-05	0.000335835
FBgn0010591	4076.01	-1.14956	0.276588	-4.15621	3.23564e-05	0.000229964
FBgn0036454	5774.29	-1.14915	0.442577	-2.59649	0.0094181	0.030139
FBgn0085430	2466.1	-1.14829	0.420058	-2.73364	0.0062639	0.0213508
FBgn0028341	3708.37	-1.14571	0.264801	-4.3267	1.51357e-05	0.000116015
FBgn0052944	165.028	-1.14559	0.454039	-2.52311	0.0116321	0.03583
FBgn0039301	212.119	-1.1447	0.369599	-3.09715	0.00195392	0.0080225
FBgn0001296	795.636	-1.14221	0.314731	-3.62918	0.000284323	0.00154723
FBgn0028686	8625.27	-1.14204	0.301572	-3.78696	0.000152501	0.000888682
FBgn0036030	2889.83	-1.14192	0.434406	-2.6287	0.00857113	0.0278193
FBgn0038564	249.419	-1.13929	0.30468	-3.73929	0.000184542	0.00104479
FBgn0260399	226.158	-1.13928	0.452467	-2.51794	0.0118045	0.0362587
FBgn0028694	6535.21	-1.13911	0.294401	-3.86925	0.000109173	0.000665612
FBgn0051251	96.5464	-1.13807	0.397858	-2.8605	0.00422976	0.0153654
FBgn0052368	509.508	-1.13736	0.460192	-2.4715	0.0134549	0.0404263
FBgn0036922	293.946	-1.136	0.444885	-2.55347	0.0106656	0.0334653
FBgn0030943	784.786	-1.13562	0.278755	-4.0739	4.62327e-05	0.000312736
FBgn0030122	579.352	-1.13517	0.341637	-3.32274	0.000891378	0.00410201
FBgn0030217	98.9183	-1.13484	0.458611	-2.47452	0.0133417	0.0401242
FBgn0031126	1406.55	-1.13356	0.237361	-4.77565	1.79127e-06	1.72472e-05
FBgn0050289	115.228	-1.13255	0.394442	-2.87126	0.00408838	0.0149811
FBgn0040010	1842.3	-1.13185	0.271934	-4.16224	3.15144e-05	0.000224563
FBgn0261881	366.085	-1.13113	0.34356	-3.29237	0.000993459	0.00449399
FBgn0032596	3672.79	-1.13093	0.346595	-3.26296	0.00110254	0.00493435
FBgn0000147	217.902	-1.13037	0.398218	-2.83858	0.00453147	0.0162456
FBgn0051637	1462.74	-1.12899	0.25098	-4.49835	6.84819e-06	5.71362e-05
FBgn0285879	950.04	-1.12851	0.361074	-3.12544	0.00177542	0.00741097
FBgn0015621	403.502	-1.12758	0.299401	-3.76613	0.000165798	0.000954977
FBgn0031609	377.641	-1.12713	0.304387	-3.70296	0.000213095	0.00119163
FBgn0035028	904.717	-1.12628	0.240062	-4.69161	2.71058e-06	2.48936e-05
FBgn0036264	1384.35	-1.12525	0.310086	-3.62882	0.000284717	0.0015486
FBgn0027553	519.379	-1.12463	0.307337	-3.65926	0.000252941	0.00139168
FBgn0038128	344.467	-1.12198	0.314708	-3.56513	0.000363671	0.00191518
FBgn0028689	7507.77	-1.1219	0.242356	-4.62916	3.67148e-06	3.26758e-05
FBgn0284080	493.208	-1.11988	0.320479	-3.4944	0.000475137	0.00240939
FBgn0016970	173.024	-1.11937	0.388685	-2.87989	0.00397809	0.0146852
FBgn0011606	720.227	-1.11888	0.353907	-3.1615	0.00156958	0.00666981
FBgn0031608	384.525	-1.1185	0.298752	-3.74392	0.000181172	0.00102783
FBgn0020391	586.149	-1.11833	0.333911	-3.34918	0.000810501	0.00379994
FBgn0004359	619.843	-1.11798	0.298492	-3.74544	0.000180076	0.00102304
FBgn0037901	1769.82	-1.11605	0.274363	-4.06778	4.74638e-05	0.000320271
FBgn0031281	360.938	-1.11584	0.298611	-3.73678	0.000186395	0.00105418
FBgn0086444	714.923	-1.11473	0.280894	-3.96853	7.23176e-05	0.000462309
FBgn0035313	125.85	-1.1139	0.450079	-2.47491	0.0133271	0.0400927
FBgn0032076	4328.66	-1.11127	0.296722	-3.74516	0.000180275	0.00102328
FBgn0261933	805.098	-1.11125	0.320391	-3.46841	0.000523545	0.00261009
FBgn0004828	15697.4	-1.11082	0.258705	-4.29376	1.75672e-05	0.000133375
FBgn0037017	137.11	-1.11043	0.34846	-3.18669	0.00143912	0.0061973
FBgn0039110	2149.96	-1.10977	0.27205	-4.0793	4.51715e-05	0.000307076
FBgn0051464	465.725	-1.10939	0.319536	-3.47187	0.000516853	0.00258143
FBgn0031664	852.369	-1.10828	0.260779	-4.24989	2.13877e-05	0.000159034
FBgn0013679	53332.9	-1.10758	0.314465	-3.52212	0.000428114	0.00220467
FBgn0027259	158.111	-1.10502	0.338492	-3.26452	0.00109648	0.00490927
FBgn0031813	2143.83	-1.10423	0.329142	-3.35488	0.00079399	0.00373654
FBgn0000412	7126.84	-1.1037	0.304237	-3.62776	0.000285887	0.00155342
FBgn0050476	123.908	-1.10247	0.388944	-2.83451	0.00458959	0.0164163
FBgn0033809	563.408	-1.10227	0.318607	-3.45965	0.000540885	0.00267944
FBgn0032295	1306.06	-1.10153	0.426092	-2.58519	0.00973261	0.0309506
FBgn0034061	785.536	-1.10126	0.311539	-3.5349	0.000407927	0.00211766
FBgn0015239	2928.33	-1.10125	0.230979	-4.76774	1.86308e-06	1.78757e-05
FBgn0027505	1255.42	-1.09785	0.286711	-3.82912	0.000128601	0.000766145
FBgn0032248	467.441	-1.0978	0.331194	-3.31467	0.000917525	0.00420263
FBgn0031298	3172.17	-1.0972	0.226526	-4.84359	1.27511e-06	1.27488e-05
FBgn0052091	1280.24	-1.09665	0.248107	-4.42005	9.86783e-06	7.91307e-05
FBgn0020312	1604.39	-1.09583	0.288782	-3.79466	0.000147846	0.000864778
FBgn0000567	5924.87	-1.09561	0.372856	-2.93843	0.00329884	0.0125505
FBgn0016032	519.446	-1.09531	0.302329	-3.6229	0.000291313	0.00157742
FBgn0036271	2065.49	-1.0948	0.358091	-3.05733	0.00223321	0.00900693
FBgn0036248	778.749	-1.09473	0.279727	-3.91358	9.09381e-05	0.000569039
FBgn0030915	311.99	-1.09452	0.337296	-3.24498	0.0011746	0.0052169
FBgn0262740	983.216	-1.09323	0.420788	-2.59806	0.00937524	0.0300106
FBgn0053129	7221.3	-1.09279	0.285878	-3.82257	0.000132067	0.000785079
FBgn0261394	6819.89	-1.09141	0.291237	-3.74749	0.00017861	0.00101593
FBgn0027660	2700.06	-1.09015	0.327488	-3.32881	0.000872182	0.0040302
FBgn0030871	359.048	-1.08865	0.32507	-3.34899	0.000811075	0.003801
FBgn0002878	506.746	-1.0882	0.350841	-3.10168	0.00192427	0.00791861
FBgn0036316	3103.94	-1.08735	0.24855	-4.37479	1.21552e-05	9.53757e-05
FBgn0011674	525.508	-1.08652	0.35976	-3.02013	0.00252668	0.0100388
FBgn0028692	15377.4	-1.08534	0.272876	-3.97742	6.96684e-05	0.000447202
FBgn0260744	3395.41	-1.08274	0.240601	-4.50017	6.78997e-06	5.66936e-05
FBgn0266666	2755.66	-1.08222	0.324422	-3.33585	0.000850379	0.003945
FBgn0038672	232.695	-1.08162	0.345742	-3.12839	0.00175769	0.00735205
FBgn0036107	439.487	-1.08023	0.377479	-2.8617	0.00421381	0.0153125
FBgn0037279	1813.29	-1.07974	0.261966	-4.12168	3.76125e-05	0.00026121
FBgn0039804	178.909	-1.07601	0.381919	-2.81739	0.00484158	0.0171805
FBgn0023177	3369.12	-1.07286	0.267339	-4.0131	5.99273e-05	0.000390635
FBgn0013726	4817.19	-1.07229	0.265489	-4.03892	5.36986e-05	0.000356188
FBgn0051360	209.986	-1.07199	0.402794	-2.6614	0.00778171	0.0256669
FBgn0024196	613.742	-1.07162	0.299517	-3.57783	0.000346458	0.00183598
FBgn0019972	3505.67	-1.07145	0.289612	-3.69962	0.000215923	0.00120621
FBgn0036356	288.523	-1.07144	0.320846	-3.33943	0.000839516	0.00391249
FBgn0036771	245.689	-1.07119	0.344948	-3.10537	0.00190041	0.0078322
FBgn0029134	9146.69	-1.07115	0.306046	-3.49998	0.0004653	0.00236653
FBgn0036105	137.712	-1.071	0.431661	-2.48112	0.0130972	0.0395848
FBgn0000395	1754.34	-1.06822	0.298437	-3.57939	0.000344397	0.00182776
FBgn0041702	216.272	-1.06782	0.400364	-2.66712	0.00765034	0.0253421
FBgn0015283	7226.93	-1.06603	0.232135	-4.5923	4.38396e-06	3.82391e-05
FBgn0033983	219.044	-1.0648	0.397177	-2.68093	0.00734188	0.024461
FBgn0036850	125.016	-1.06446	0.350405	-3.0378	0.00238314	0.00952384
FBgn0283659	119.708	-1.06294	0.360847	-2.94567	0.00322257	0.0123074
FBgn0263143	97.5082	-1.0618	0.404385	-2.62573	0.00864643	0.0280221
FBgn0032235	967.547	-1.0607	0.396207	-2.67713	0.0074255	0.0246945
FBgn0015919	877.711	-1.05879	0.335807	-3.15299	0.0016161	0.00684091
FBgn0034232	241.137	-1.05852	0.381722	-2.773	0.00555417	0.0192413
FBgn0034186	274.349	-1.05634	0.313585	-3.36859	0.000755534	0.00358215
FBgn0000499	1598.78	-1.0557	0.269418	-3.91845	8.91205e-05	0.000558945
FBgn0024314	3145.1	-1.05463	0.270847	-3.89384	9.86706e-05	0.000610095
FBgn0033528	443.585	-1.05434	0.381852	-2.76112	0.00576027	0.0198256
FBgn0031070	451.746	-1.05359	0.348521	-3.02302	0.00250265	0.00995056
FBgn0033884	396.388	-1.05273	0.335106	-3.1415	0.00168085	0.00706765
FBgn0031287	372.625	-1.05247	0.280455	-3.75273	0.000174922	0.000999409
FBgn0085369	116.412	-1.0523	0.411865	-2.55497	0.0106196	0.0333307
FBgn0027784	439.47	-1.05167	0.308305	-3.41114	0.000646919	0.00313236
FBgn0035761	449.02	-1.05131	0.438149	-2.39944	0.0164202	0.0475521
FBgn0023175	6005.96	-1.05088	0.29047	-3.61785	0.000297066	0.00160222
FBgn0030530	2021.86	-1.05072	0.278547	-3.77215	0.000161849	0.000934195
FBgn0262976	281.78	-1.04936	0.326045	-3.21844	0.0012889	0.00564823
FBgn0028518	975.31	-1.04919	0.32912	-3.18786	0.00143331	0.00617955
FBgn0264291	180.481	-1.04857	0.429566	-2.44101	0.0146464	0.0432861
FBgn0046302	2222.29	-1.047	0.363401	-2.88111	0.0039628	0.014648
FBgn0032682	750.616	-1.04678	0.351108	-2.98135	0.00286982	0.011151
FBgn0032150	154.145	-1.04613	0.353076	-2.96289	0.00304764	0.0117212
FBgn0039066	713.211	-1.04501	0.251854	-4.14927	3.33533e-05	0.000236129
FBgn0052095	266.393	-1.04494	0.344174	-3.03609	0.00239668	0.00957447
FBgn0287775	1244.06	-1.04438	0.359634	-2.904	0.00368432	0.0137822
FBgn0014879	2140.28	-1.0442	0.311895	-3.34792	0.000814194	0.00381361
FBgn0034008	307.671	-1.04395	0.334024	-3.12537	0.00177584	0.00741097
FBgn0039743	1747	-1.04347	0.250795	-4.16064	3.17362e-05	0.000225703
FBgn0034488	3480.17	-1.04338	0.26404	-3.95159	7.76331e-05	0.000493119
FBgn0030158	1032.47	-1.04309	0.432641	-2.41098	0.0159097	0.0463078
FBgn0027903	364.158	-1.0429	0.394877	-2.64107	0.00826442	0.0269839
FBgn0003741	308.543	-1.04279	0.294794	-3.53733	0.000404189	0.00210324
FBgn0034476	1316.82	-1.042	0.426393	-2.44376	0.0145352	0.0430739
FBgn0032330	2145.93	-1.04188	0.311574	-3.34392	0.000826046	0.00385801
FBgn0053965	128.736	-1.03825	0.408199	-2.5435	0.0109749	0.0342296
FBgn0031992	747	-1.03686	0.333605	-3.10804	0.00188331	0.00778816
FBgn0038424	1104.18	-1.03674	0.281889	-3.67784	0.000235217	0.00130401
FBgn0287864	559.19	-1.03664	0.367742	-2.81892	0.0048185	0.0171286
FBgn0261385	2068.44	-1.03612	0.304971	-3.39743	0.000680227	0.0032676
FBgn0000057	1533.87	-1.03484	0.250802	-4.12613	3.68925e-05	0.000257026
FBgn0003302	360.585	-1.02977	0.289738	-3.55415	0.000379206	0.00198457
FBgn0038113	259.345	-1.02891	0.303871	-3.38603	0.000709125	0.00338856
FBgn0010313	2280.34	-1.02832	0.358044	-2.87204	0.00407825	0.0149541
FBgn0032517	445.172	-1.02582	0.269805	-3.80209	0.00014348	0.000842396
FBgn0033846	1012.93	-1.02581	0.301013	-3.40785	0.00065476	0.00316195
FBgn0034264	437.188	-1.02442	0.305322	-3.35519	0.000793093	0.00373433
FBgn0035574	2326.29	-1.02408	0.293419	-3.49015	0.000482746	0.00244231
FBgn0037852	1717.67	-1.02253	0.292745	-3.4929	0.000477801	0.00241953
FBgn0037617	358.427	-1.02213	0.293799	-3.47902	0.00050325	0.0025285
FBgn0003512	1074.64	-1.02154	0.34028	-3.00206	0.00268162	0.0105699
FBgn0051778	2956.02	-1.02148	0.402443	-2.5382	0.0111426	0.0346542
FBgn0032475	1398.04	-1.01963	0.284103	-3.58895	0.000332012	0.00176718
FBgn0010590	5350.48	-1.01886	0.325852	-3.12677	0.00176735	0.00738683
FBgn0039557	389.523	-1.01823	0.306082	-3.32666	0.000878944	0.00405307
FBgn0036342	278.082	-1.01688	0.329548	-3.08569	0.00203082	0.00829158
FBgn0025186	1114.37	-1.01679	0.292509	-3.47611	0.000508741	0.00254907
FBgn0027836	5933.38	-1.0166	0.421379	-2.41256	0.0158408	0.0461553
FBgn0053207	281.616	-1.01398	0.410706	-2.46887	0.013554	0.0406844
FBgn0033810	477.275	-1.01383	0.294366	-3.44412	0.00057292	0.00282025
FBgn0031489	846.072	-1.01379	0.355192	-2.85421	0.00431435	0.0155847
FBgn0052803	191.675	-1.01375	0.425959	-2.37993	0.017316	0.0497119
FBgn0015828	1209.58	-1.01363	0.269322	-3.76364	0.000167456	0.00096199
FBgn0033427	247.366	-1.01317	0.326896	-3.09936	0.00193939	0.00797484
FBgn0038046	1440.33	-1.01314	0.29217	-3.46766	0.000525017	0.00261504
FBgn0034858	2013.29	-1.01293	0.250166	-4.04902	5.14326e-05	0.000342822
FBgn0030456	1082.41	-1.01293	0.300594	-3.36975	0.000752361	0.00357021
FBgn0036038	694.911	-1.01288	0.365598	-2.77047	0.00559758	0.0193754
FBgn0000061	417.89	-1.01231	0.355056	-2.85113	0.00435641	0.0157003
FBgn0025807	136.568	-1.01224	0.421254	-2.40291	0.016265	0.0471651
FBgn0004367	425.944	-1.01189	0.336995	-3.00269	0.00267605	0.0105518
FBgn0250746	7311.02	-1.0112	0.287771	-3.5139	0.000441579	0.00226335
FBgn0000352	1133.51	-1.01116	0.26007	-3.88804	0.000101056	0.000623433
FBgn0031456	629.952	-1.00939	0.272067	-3.71009	0.000207182	0.00116273
FBgn0039207	1710.1	-1.00888	0.279113	-3.61461	0.000300801	0.00161918
FBgn0035690	1071.01	-1.0087	0.299621	-3.36658	0.000761051	0.00360051
FBgn0050342	1069.4	-1.008	0.279412	-3.60757	0.000309081	0.00165803
FBgn0020278	5412.09	-1.00744	0.253543	-3.97345	7.08395e-05	0.000453655
FBgn0261238	1678.26	-1.00689	0.347508	-2.89747	0.00376187	0.0140387
FBgn0028978	3650.54	-1.00603	0.282073	-3.56655	0.000361715	0.00190672
FBgn0024991	584.515	-1.00572	0.318516	-3.15752	0.0015912	0.00674593
FBgn0029828	559.86	-1.00429	0.398385	-2.52089	0.0117057	0.0359853
FBgn0028572	790.041	-1.00178	0.286889	-3.49188	0.000479639	0.00242772
FBgn0038043	1499	-1.00173	0.257729	-3.88675	0.000101595	0.000626406
FBgn0284247	1658.44	-0.99843	0.408344	-2.44507	0.0144823	0.0429639
FBgn0051436	766.987	-0.998173	0.305723	-3.26496	0.00109481	0.00490378
FBgn0020412	1913.41	-0.997361	0.33425	-2.98388	0.00284618	0.0110828
FBgn0031450	3772.43	-0.997194	0.283654	-3.51553	0.00043887	0.00225158
FBgn0038673	219.024	-0.99649	0.320764	-3.10662	0.00189241	0.00780805
FBgn0041174	218.832	-0.996229	0.387063	-2.57382	0.0100583	0.0318431
FBgn0027602	685.302	-0.995228	0.325146	-3.06087	0.00220698	0.0089176
FBgn0033315	237.796	-0.994992	0.343047	-2.90046	0.0037262	0.0139293
FBgn0032811	199.295	-0.99437	0.344476	-2.88662	0.00389408	0.0144189
FBgn0030500	284.82	-0.993865	0.405924	-2.4484	0.0143491	0.0426178
FBgn0038324	140.719	-0.993802	0.384948	-2.58165	0.00983294	0.0312258
FBgn0015808	4829.27	-0.9937	0.262252	-3.7891	0.000151195	0.000882483
FBgn0023130	495.91	-0.993239	0.305899	-3.24695	0.0011665	0.00518668
FBgn0031866	609.103	-0.99315	0.372652	-2.66508	0.00769689	0.0254731
FBgn0035518	655.422	-0.992736	0.28735	-3.45479	0.000550712	0.00272442
FBgn0038767	159.66	-0.992394	0.397375	-2.49738	0.0125116	0.0381074
FBgn0030465	841.74	-0.992196	0.357217	-2.77757	0.00547676	0.0190416
FBgn0038769	381.629	-0.991771	0.322062	-3.07944	0.00207392	0.00842978
FBgn0033813	439.946	-0.991685	0.306001	-3.24079	0.00119199	0.00528283
FBgn0267449	2120.07	-0.991602	0.353069	-2.80852	0.00497693	0.0175832
FBgn0082598	3167.62	-0.991233	0.381823	-2.59606	0.00943008	0.0301597
FBgn0026181	3106.89	-0.989933	0.330774	-2.99278	0.00276449	0.0108274
FBgn0264574	1409.26	-0.98947	0.341995	-2.89323	0.00381306	0.014191
FBgn0033249	114.628	-0.989333	0.388051	-2.54949	0.0107881	0.0337721
FBgn0017551	588.758	-0.988411	0.377739	-2.61665	0.00887964	0.0286617
FBgn0003525	1101.1	-0.987607	0.405078	-2.43807	0.0147661	0.0435811
FBgn0035152	416.409	-0.987067	0.291327	-3.38817	0.0007036	0.00336657
FBgn0034921	1069.45	-0.985879	0.343785	-2.86772	0.00413446	0.0150994
FBgn0051717	1789.85	-0.985741	0.344759	-2.85922	0.00424687	0.015402
FBgn0036847	905.669	-0.985153	0.388264	-2.53733	0.0111702	0.03471
FBgn0030874	276.038	-0.985123	0.310537	-3.17233	0.00151224	0.00647898
FBgn0036695	559.147	-0.984475	0.302304	-3.25657	0.00112768	0.00504071
FBgn0035148	562.714	-0.983933	0.289208	-3.40216	0.000668543	0.00321996
FBgn0288833	416.113	-0.982707	0.383529	-2.56228	0.0103988	0.0327691
FBgn0035248	176.173	-0.981729	0.330647	-2.96912	0.00298657	0.011539
FBgn0031115	641.98	-0.981689	0.264047	-3.71785	0.000200923	0.0011305
FBgn0034046	799.214	-0.980719	0.328514	-2.98532	0.00283284	0.0110426
FBgn0260755	541.045	-0.980713	0.329951	-2.9723	0.00295579	0.0114403
FBgn0030241	1449.15	-0.980519	0.401959	-2.43935	0.0147136	0.0434497
FBgn0051495	184.836	-0.980416	0.339098	-2.89124	0.00383719	0.0142469
FBgn0039381	1582.34	-0.980386	0.235946	-4.15513	3.25103e-05	0.000230907
FBgn0030418	692.936	-0.980321	0.348646	-2.81179	0.00492661	0.0174336
FBgn0250869	1046.77	-0.979541	0.310008	-3.15972	0.00157918	0.0067054
FBgn0052428	2273.49	-0.979118	0.334492	-2.92718	0.00342053	0.0129549
FBgn0037555	1686.23	-0.978976	0.2464	-3.97312	7.09382e-05	0.000454021
FBgn0051100	3119.19	-0.978011	0.295278	-3.31217	0.000925756	0.00423856
FBgn0036973	290.629	-0.976469	0.280472	-3.48152	0.00049858	0.00250734
FBgn0040071	2149.45	-0.976058	0.307113	-3.17817	0.00148206	0.00635964
FBgn0030208	3552.6	-0.974723	0.263463	-3.69965	0.000215895	0.00120621
FBgn0025630	661.743	-0.97467	0.296336	-3.28907	0.0010052	0.00454335
FBgn0036761	1901.21	-0.974254	0.241899	-4.02752	5.63687e-05	0.000369863
FBgn0037885	283.787	-0.974233	0.333673	-2.91972	0.00350344	0.013214
FBgn0033842	338.748	-0.974128	0.352271	-2.76528	0.00568736	0.0196427
FBgn0011327	2498.95	-0.973668	0.31376	-3.10323	0.00191421	0.00788314
FBgn0037734	1187.29	-0.973658	0.302354	-3.22026	0.00128074	0.00562375
FBgn0035831	270.367	-0.973058	0.363266	-2.67864	0.00739229	0.024599
FBgn0035073	286.219	-0.972743	0.394628	-2.46496	0.0137027	0.0410405
FBgn0031534	4317.1	-0.972649	0.2454	-3.96353	7.38495e-05	0.000470896
FBgn0002932	269.804	-0.972311	0.373429	-2.60374	0.00922129	0.0296132
FBgn0003391	2569.5	-0.970881	0.321273	-3.02198	0.00251128	0.00998125
FBgn0031314	556.297	-0.969279	0.298473	-3.24746	0.0011644	0.00518485
FBgn0038619	238.219	-0.968749	0.324443	-2.98589	0.00282757	0.0110264
FBgn0011648	2452.39	-0.967848	0.223934	-4.32202	1.54609e-05	0.000118343
FBgn0259714	368.835	-0.967398	0.39467	-2.45115	0.0142399	0.042371
FBgn0004406	451.315	-0.967049	0.34317	-2.81799	0.00483256	0.0171635
FBgn0031319	1290.11	-0.966176	0.268248	-3.60181	0.000316012	0.00168859
FBgn0052850	930.792	-0.965328	0.343989	-2.80627	0.0050118	0.0176807
FBgn0004510	419.278	-0.964001	0.287188	-3.35669	0.000788808	0.00371576
FBgn0027620	886.842	-0.963263	0.327051	-2.9453	0.00322641	0.0123178
FBgn0032700	541.864	-0.962211	0.289505	-3.32365	0.000888489	0.00409364
FBgn0003308	1606.48	-0.961432	0.335405	-2.86648	0.00415059	0.0151281
FBgn0032348	1328.91	-0.959691	0.309024	-3.10556	0.00189922	0.00783024
FBgn0039501	182.212	-0.959464	0.356601	-2.69058	0.00713273	0.0238586
FBgn0029874	565.02	-0.957906	0.264677	-3.61915	0.000295567	0.00159571
FBgn0035981	2184	-0.957648	0.275391	-3.47741	0.00050629	0.00253957
FBgn0052446	1846.93	-0.956997	0.254159	-3.76534	0.00016632	0.000956972
FBgn0030051	3606.74	-0.955032	0.243317	-3.92505	8.67119e-05	0.000544776
FBgn0036323	129.373	-0.954977	0.382404	-2.4973	0.0125143	0.0381074
FBgn0026679	1502.41	-0.954605	0.343212	-2.78139	0.00541275	0.018861
FBgn0261811	1781.94	-0.954447	0.31396	-3.04002	0.00236559	0.00946061
FBgn0011655	1469.94	-0.952209	0.279602	-3.40559	0.000660206	0.00318401
FBgn0029117	310.636	-0.951463	0.374556	-2.54024	0.0110775	0.034516
FBgn0037634	136.421	-0.950693	0.361426	-2.6304	0.00852853	0.0276975
FBgn0025777	1199.86	-0.950566	0.277209	-3.42906	0.000605671	0.00295751
FBgn0030753	5406.98	-0.950214	0.253093	-3.75441	0.000173752	0.000993984
FBgn0034627	164.827	-0.950098	0.323491	-2.93702	0.00331386	0.0125989
FBgn0035271	327.932	-0.950086	0.318194	-2.98588	0.00282768	0.0110264
FBgn0051721	275.759	-0.94918	0.381481	-2.48815	0.0128411	0.0389399
FBgn0034380	446.439	-0.949095	0.286907	-3.30803	0.000939558	0.00429095
FBgn0263199	2566.49	-0.948727	0.271911	-3.48911	0.000484627	0.00245069
FBgn0024191	513	-0.948345	0.340754	-2.78308	0.00538463	0.018781
FBgn0038569	1394.74	-0.94702	0.280952	-3.37076	0.000749618	0.00355983
FBgn0031886	202.014	-0.946559	0.349423	-2.70892	0.00675018	0.0227409
FBgn0020279	11675.7	-0.946205	0.345831	-2.73603	0.00621854	0.0212226
FBgn0030010	154.356	-0.94538	0.379602	-2.49045	0.0127581	0.0387204
FBgn0038881	3485.62	-0.945211	0.306624	-3.08264	0.00205172	0.00835508
FBgn0036519	357.611	-0.945092	0.306497	-3.08353	0.00204564	0.0083365
FBgn0039013	435.5	-0.944084	0.28863	-3.27091	0.00107201	0.00481347
FBgn0026702	426.922	-0.944075	0.345598	-2.73171	0.00630061	0.0214424
FBgn0051223	249.4	-0.943972	0.297407	-3.17401	0.00150348	0.00644653
FBgn0052191	814.666	-0.943281	0.299236	-3.15229	0.00161993	0.00685447
FBgn0260940	528.623	-0.943152	0.308116	-3.06103	0.00220579	0.00891682
FBgn0023506	353.205	-0.94264	0.323803	-2.91115	0.00360095	0.0135212
FBgn0026149	667.994	-0.942074	0.31592	-2.982	0.00286369	0.0111351
FBgn0027363	3697.04	-0.942055	0.293179	-3.21324	0.00131248	0.00572861
FBgn0032391	289.972	-0.941934	0.330447	-2.85049	0.00436524	0.0157217
FBgn0086356	993.102	-0.941466	0.362734	-2.59547	0.00944608	0.0301899
FBgn0035415	495.845	-0.941266	0.325846	-2.88868	0.00386858	0.0143488
FBgn0052104	293.911	-0.94006	0.308964	-3.04262	0.00234529	0.00939317
FBgn0026575	3321.54	-0.939402	0.331692	-2.83215	0.00462357	0.0165324
FBgn0029756	470.068	-0.937752	0.318831	-2.94121	0.00326928	0.0124641
FBgn0025469	455.715	-0.937419	0.295787	-3.16923	0.00152842	0.00653808
FBgn0051457	293.061	-0.937312	0.316262	-2.96372	0.00303946	0.0116983
FBgn0030499	1076.43	-0.937138	0.344961	-2.71665	0.00659465	0.0223181
FBgn0035140	300.974	-0.936398	0.326671	-2.86648	0.0041506	0.0151281
FBgn0039141	896.326	-0.936179	0.265299	-3.52877	0.00041749	0.0021591
FBgn0010905	2259.61	-0.935745	0.385727	-2.42592	0.0152694	0.0447887
FBgn0010316	963.663	-0.934982	0.290041	-3.22362	0.00126581	0.00556487
FBgn0033669	1165.64	-0.934683	0.32682	-2.85994	0.00423726	0.0153824
FBgn0032846	377.654	-0.934555	0.273571	-3.41614	0.000635154	0.003081
FBgn0034184	1717.95	-0.931919	0.240864	-3.86906	0.000109254	0.000665612
FBgn0038472	336.616	-0.930514	0.322762	-2.88298	0.00393937	0.0145718
FBgn0039558	501.186	-0.929084	0.281309	-3.30272	0.000957509	0.00435855
FBgn0032421	1012.93	-0.928162	0.352729	-2.63137	0.00850406	0.0276262
FBgn0029114	1189.19	-0.927368	0.346129	-2.67925	0.0073787	0.0245612
FBgn0285992	1734.8	-0.926078	0.316245	-2.92836	0.00340756	0.0129237
FBgn0085428	1205.8	-0.925302	0.303645	-3.04731	0.00230896	0.00926712
FBgn0029929	883.81	-0.925282	0.317448	-2.91475	0.0035597	0.0134077
FBgn0004915	781.484	-0.924157	0.32797	-2.81781	0.00483531	0.0171661
FBgn0033781	600.8	-0.923823	0.341798	-2.70283	0.00687512	0.0230958
FBgn0033569	322.952	-0.922218	0.275467	-3.34783	0.000814462	0.00381361
FBgn0032250	287.772	-0.922199	0.332715	-2.77174	0.00557569	0.0193058
FBgn0030791	1770.59	-0.919535	0.236794	-3.88327	0.000103061	0.000632593
FBgn0002787	9222.59	-0.919108	0.233784	-3.93145	8.44363e-05	0.000532314
FBgn0030008	351.494	-0.918646	0.310915	-2.95466	0.00313018	0.0119964
FBgn0015618	359.926	-0.918421	0.274584	-3.34477	0.000823515	0.00384941
FBgn0052772	1018.41	-0.917728	0.269946	-3.39967	0.000674676	0.00324378
FBgn0003567	1865.81	-0.917235	0.22763	-4.02949	5.5897e-05	0.000366988
FBgn0039044	392.114	-0.916355	0.272418	-3.36378	0.000768824	0.00363257
FBgn0032020	420.635	-0.915978	0.340414	-2.69078	0.0071286	0.0238521
FBgn0036828	883.789	-0.915803	0.32634	-2.80629	0.0050116	0.0176807
FBgn0020300	487.85	-0.914627	0.377952	-2.41996	0.0155223	0.0453845
FBgn0037368	153.405	-0.912332	0.351517	-2.59541	0.00944781	0.0301899
FBgn0034688	1636.14	-0.912304	0.27686	-3.29518	0.000983592	0.00445303
FBgn0003514	7671.53	-0.910887	0.280126	-3.2517	0.00114717	0.00511735
FBgn0029175	361.105	-0.91039	0.292303	-3.11455	0.00184228	0.00763867
FBgn0032149	283.79	-0.910172	0.362458	-2.51111	0.0120352	0.0368086
FBgn0039766	153.31	-0.909633	0.365306	-2.49006	0.0127722	0.0387524
FBgn0263121	3916.52	-0.905258	0.323732	-2.79632	0.00516879	0.0181556
FBgn0038640	551.443	-0.904156	0.29944	-3.01949	0.00253201	0.0100563
FBgn0038092	2926.28	-0.903598	0.333421	-2.71008	0.00672673	0.022681
FBgn0260243	817.163	-0.902908	0.322667	-2.79826	0.00513784	0.01807
FBgn0051683	800.268	-0.90209	0.2628	-3.43261	0.000597795	0.00292427
FBgn0038830	497.131	-0.902011	0.329495	-2.73756	0.00618977	0.021131
FBgn0024194	471.248	-0.901884	0.293229	-3.0757	0.0021001	0.00852668
FBgn0265190	412.212	-0.901167	0.338437	-2.66273	0.00775101	0.0255903
FBgn0032231	788.195	-0.899951	0.355971	-2.52816	0.0114662	0.0354247
FBgn0003116	238.61	-0.899576	0.365355	-2.46219	0.013809	0.0413023
FBgn0035308	1338.76	-0.898849	0.267374	-3.36177	0.000774456	0.00365472
FBgn0032258	911.768	-0.897807	0.251056	-3.57612	0.000348737	0.00184632
FBgn0034939	490.671	-0.897333	0.297797	-3.01323	0.00258479	0.0102436
FBgn0264305	603.019	-0.897168	0.33097	-2.71073	0.00671362	0.0226437
FBgn0052100	339.902	-0.8969	0.357777	-2.50687	0.0121807	0.037195
FBgn0035631	3132.18	-0.89544	0.267547	-3.34686	0.000817332	0.00382377
FBgn0004057	951.096	-0.895057	0.278219	-3.21709	0.00129497	0.00566614
FBgn0036340	2774.31	-0.894631	0.30927	-2.89271	0.00381928	0.0142093
FBgn0261722	1709.85	-0.893813	0.249075	-3.58853	0.000332546	0.00176916
FBgn0038166	1415.5	-0.893256	0.298135	-2.99614	0.00273418	0.0107423
FBgn0015829	317.101	-0.892216	0.301047	-2.96371	0.00303955	0.0116983
FBgn0037814	682.65	-0.892179	0.262311	-3.40123	0.000670839	0.00322959
FBgn0040929	145.113	-0.892153	0.348469	-2.56021	0.010461	0.0329274
FBgn0033133	1891.03	-0.890857	0.355266	-2.50758	0.0121561	0.0371405
FBgn0003330	693.12	-0.890816	0.28467	-3.12929	0.00175229	0.00733509
FBgn0034997	4697.35	-0.890034	0.30919	-2.8786	0.00399443	0.0147306
FBgn0003479	353.689	-0.889303	0.350645	-2.53619	0.0112066	0.0347851
FBgn0263602	499.863	-0.888493	0.303503	-2.92746	0.0034174	0.012952
FBgn0030701	2049.79	-0.888459	0.255498	-3.47736	0.000506382	0.00253957
FBgn0051390	814.697	-0.888019	0.285739	-3.1078	0.00188484	0.0077886
FBgn0039680	628.324	-0.887726	0.357744	-2.48146	0.0130847	0.0395578
FBgn0050382	3994.5	-0.887543	0.318397	-2.78753	0.00531109	0.01856
FBgn0034439	286.013	-0.886635	0.347398	-2.55222	0.010704	0.0335667
FBgn0037235	1571.31	-0.886485	0.277303	-3.19681	0.00138956	0.00601941
FBgn0286786	1357.72	-0.885938	0.328786	-2.69457	0.00704793	0.0236183
FBgn0030025	639.711	-0.885907	0.290481	-3.04979	0.00229001	0.00920211
FBgn0263237	551.048	-0.885851	0.297604	-2.97661	0.00291454	0.0113007
FBgn0038577	1325.57	-0.885306	0.316223	-2.79963	0.00511618	0.0180054
FBgn0030956	863.644	-0.885101	0.256422	-3.45174	0.000556994	0.00275176
FBgn0259916	353.501	-0.884429	0.360099	-2.45607	0.0140465	0.0418755
FBgn0039702	259.087	-0.884002	0.366044	-2.41502	0.0157345	0.0459002
FBgn0035166	555.335	-0.883789	0.303989	-2.9073	0.00364558	0.0136647
FBgn0046247	1204.08	-0.882923	0.24493	-3.60479	0.000312402	0.00167338
FBgn0040729	255.416	-0.88234	0.308497	-2.86012	0.00423474	0.0153784
FBgn0052343	321.691	-0.882135	0.318976	-2.76552	0.0056832	0.0196353
FBgn0015299	374.796	-0.880174	0.306347	-2.87313	0.00406433	0.014913
FBgn0027564	774.437	-0.880059	0.348822	-2.52295	0.0116376	0.0358366
FBgn0032016	538.536	-0.879543	0.322761	-2.72506	0.00642893	0.0218316
FBgn0004868	15131.8	-0.879439	0.216653	-4.05921	4.92383e-05	0.00033041
FBgn0000618	549.827	-0.879433	0.335739	-2.61939	0.00880865	0.0284635
FBgn0037707	1304.26	-0.878478	0.296644	-2.96138	0.00306261	0.0117705
FBgn0039911	249.953	-0.87836	0.349117	-2.51595	0.0118713	0.0364129
FBgn0014269	1108.37	-0.877951	0.255202	-3.44021	0.000581259	0.0028515
FBgn0031951	678.711	-0.877509	0.317356	-2.76506	0.00569123	0.0196492
FBgn0040636	330.233	-0.877437	0.358542	-2.44724	0.0143956	0.0427412
FBgn0038874	886.66	-0.876987	0.264351	-3.31751	0.000908241	0.00416884
FBgn0037999	574.255	-0.876312	0.344237	-2.54566	0.0109071	0.0340669
FBgn0262114	6355.37	-0.875563	0.286493	-3.05615	0.00224201	0.00903247
FBgn0031398	339.066	-0.874892	0.332336	-2.63255	0.00847466	0.0275494
FBgn0002643	2893.25	-0.874485	0.349877	-2.49941	0.0124401	0.0379129
FBgn0038461	907.619	-0.870922	0.364218	-2.39121	0.016793	0.0484011
FBgn0031814	1820.63	-0.870883	0.254791	-3.41803	0.000630759	0.00306309
FBgn0013954	6824.25	-0.86982	0.28958	-3.00373	0.00266692	0.0105234
FBgn0260397	427.839	-0.869777	0.339354	-2.56303	0.0103762	0.0327074
FBgn0034606	1402.85	-0.869174	0.320065	-2.71561	0.00661528	0.0223741
FBgn0053493	3278.6	-0.866366	0.251966	-3.43843	0.000585104	0.00286604
FBgn0002567	2010.66	-0.866215	0.307649	-2.8156	0.00486862	0.0172571
FBgn0031739	388.587	-0.865958	0.301709	-2.87018	0.00410242	0.0150275
FBgn0029512	1570.78	-0.864821	0.32974	-2.62274	0.0087226	0.0282188
FBgn0035149	423.326	-0.864017	0.302477	-2.85647	0.00428377	0.0154998
FBgn0035872	3903.9	-0.863957	0.282282	-3.06062	0.00220879	0.00892164
FBgn0037679	538.774	-0.86306	0.265072	-3.25595	0.00113013	0.00504957
FBgn0035470	461.249	-0.862453	0.309285	-2.78854	0.0052946	0.0185083
FBgn0026373	840.69	-0.862243	0.338312	-2.54867	0.0108136	0.0338269
FBgn0265101	1662.01	-0.861438	0.336363	-2.56103	0.0104361	0.0328678
FBgn0264443	874.687	-0.861012	0.308658	-2.78953	0.00527845	0.0184635
FBgn0036405	426.89	-0.860596	0.291424	-2.95308	0.00314624	0.0120538
FBgn0031628	165.384	-0.857352	0.320125	-2.67818	0.0074023	0.0246248
FBgn0052418	323.403	-0.856212	0.323858	-2.64379	0.00819831	0.0267921
FBgn0034199	341.15	-0.856074	0.354823	-2.41268	0.0158358	0.0461529
FBgn0031681	2726.61	-0.855415	0.272302	-3.14142	0.0016813	0.00706765
FBgn0032450	291.689	-0.854628	0.290705	-2.93985	0.00328376	0.0125062
FBgn0039019	716.058	-0.85363	0.287596	-2.96816	0.00299591	0.0115629
FBgn0037359	231.536	-0.853361	0.332195	-2.56886	0.0102035	0.0322279
FBgn0027609	777.402	-0.851744	0.276205	-3.08373	0.0020442	0.00833374
FBgn0042175	1787.02	-0.850152	0.251703	-3.3776	0.000731215	0.00348043
FBgn0036372	1611.8	-0.85015	0.246925	-3.44295	0.000575407	0.00282995
FBgn0039139	466.685	-0.849787	0.299003	-2.84207	0.00448214	0.0160956
FBgn0038675	589.607	-0.849668	0.289364	-2.93633	0.00332123	0.0126225
FBgn0035593	1344.53	-0.848829	0.253418	-3.34952	0.000809519	0.00379859
FBgn0034503	631.73	-0.848661	0.326529	-2.59903	0.00934869	0.0299432
FBgn0085376	4173.91	-0.84707	0.327407	-2.58721	0.00967568	0.030828
FBgn0030877	795.628	-0.847013	0.334674	-2.53086	0.0113783	0.0352266
FBgn0016754	1528.75	-0.846523	0.296971	-2.85053	0.00436469	0.0157217
FBgn0051715	245.73	-0.846417	0.320436	-2.64146	0.00825507	0.0269615
FBgn0263231	7218.71	-0.845178	0.296772	-2.84791	0.00440077	0.0158393
FBgn0004919	565.833	-0.843603	0.348691	-2.41934	0.0155485	0.0454489
FBgn0005636	1069.84	-0.842853	0.2895	-2.91141	0.00359805	0.0135212
FBgn0036292	211.35	-0.8428	0.3464	-2.43302	0.0149733	0.0440499
FBgn0051249	348.985	-0.840677	0.269797	-3.11596	0.00183348	0.00760798
FBgn0040334	664.923	-0.840618	0.264036	-3.18373	0.00145393	0.00625612
FBgn0000339	1144.31	-0.840476	0.33341	-2.52085	0.0117073	0.0359853
FBgn0015838	1463.31	-0.839686	0.348173	-2.41169	0.0158788	0.0462414
FBgn0266420	971.423	-0.839399	0.334253	-2.51126	0.01203	0.0368066
FBgn0037973	1259.35	-0.83839	0.266329	-3.14795	0.00164419	0.0069437
FBgn0086368	570.775	-0.837894	0.277137	-3.02339	0.00249958	0.00994198
FBgn0027548	1687.44	-0.837331	0.318741	-2.62699	0.0086143	0.0279263
FBgn0036155	538.433	-0.83629	0.274773	-3.04357	0.00233789	0.00936699
FBgn0050390	254.595	-0.835349	0.32127	-2.60015	0.00931842	0.0298708
FBgn0028926	526.268	-0.835194	0.29207	-2.85957	0.00424216	0.0153911
FBgn0038768	647.561	-0.83495	0.265721	-3.14221	0.0016768	0.00705689
FBgn0264389	1078.55	-0.834681	0.272432	-3.06381	0.00218534	0.0088465
FBgn0015320	1897.05	-0.834367	0.27063	-3.08305	0.00204891	0.00834674
FBgn0031871	841.055	-0.832645	0.303438	-2.74404	0.00606888	0.0207442
FBgn0016715	4112.47	-0.831956	0.302399	-2.75118	0.00593809	0.020348
FBgn0005596	1022.12	-0.831656	0.263966	-3.15062	0.00162927	0.00688866
FBgn0036141	1298.58	-0.830852	0.285399	-2.91119	0.00360055	0.0135212
FBgn0260756	484.241	-0.829728	0.342789	-2.42052	0.0154983	0.0453385
FBgn0033925	716.107	-0.829562	0.269159	-3.08206	0.00205575	0.00836525
FBgn0042213	436.841	-0.828924	0.337986	-2.45254	0.0141852	0.0422199
FBgn0085451	5526.07	-0.828879	0.33445	-2.47833	0.0131999	0.039796
FBgn0266918	1635.64	-0.827299	0.295853	-2.79632	0.00516882	0.0181556
FBgn0265464	859.77	-0.827245	0.255085	-3.24302	0.00118272	0.00524597
FBgn0030243	2282.56	-0.826912	0.34384	-2.40493	0.0161756	0.0469432
FBgn0004395	1742.99	-0.8257	0.340143	-2.4275	0.0152031	0.044618
FBgn0039117	858.586	-0.823623	0.332163	-2.47957	0.013154	0.0396796
FBgn0010194	1024.87	-0.823598	0.332439	-2.47744	0.0132329	0.0398736
FBgn0022786	768.066	-0.822042	0.315052	-2.60923	0.00907475	0.0292
FBgn0036837	15029.7	-0.820935	0.271459	-3.02415	0.00249331	0.00992062
FBgn0027108	5636.97	-0.819739	0.316549	-2.58961	0.00960845	0.0306406
FBgn0013531	195.521	-0.819584	0.330801	-2.47758	0.0132278	0.0398694
FBgn0261573	2782.22	-0.818821	0.26468	-3.09362	0.00197731	0.00811244
FBgn0030474	665.705	-0.817453	0.269588	-3.03223	0.0024275	0.00967772
FBgn0037539	1285.78	-0.816446	0.264199	-3.09027	0.00199975	0.00818302
FBgn0027091	1774.26	-0.81432	0.292843	-2.78074	0.00542356	0.0188927
FBgn0261387	1836.79	-0.814054	0.264158	-3.0817	0.00205824	0.00837226
FBgn0036337	3895.7	-0.812959	0.309728	-2.62475	0.00867126	0.028086
FBgn0037688	1013.15	-0.812776	0.308275	-2.63653	0.0083759	0.0272909
FBgn0051989	312.784	-0.808622	0.316011	-2.55884	0.0105021	0.0330256
FBgn0031673	991.404	-0.808341	0.271123	-2.98146	0.00286877	0.0111509
FBgn0010356	878.873	-0.808199	0.304351	-2.65548	0.00791955	0.0260295
FBgn0031453	13957	-0.806944	0.289167	-2.79058	0.0052614	0.0184157
FBgn0032924	812.857	-0.805188	0.279461	-2.88122	0.00396143	0.014648
FBgn0038763	1090.76	-0.804775	0.303556	-2.65116	0.00802168	0.0262968
FBgn0032688	672.172	-0.803666	0.267295	-3.00666	0.00264132	0.0104299
FBgn0038760	725.996	-0.803619	0.249014	-3.22721	0.00125005	0.00551109
FBgn0030318	1731.44	-0.803559	0.244828	-3.28213	0.00103025	0.00464314
FBgn0261239	1325.61	-0.803057	0.325533	-2.4669	0.013629	0.0408421
FBgn0033316	663.948	-0.802874	0.287323	-2.79433	0.00520076	0.0182327
FBgn0050392	1153.18	-0.801914	0.280928	-2.85451	0.00431028	0.0155751
FBgn0035150	328.175	-0.801429	0.281876	-2.8432	0.00446633	0.0160594
FBgn0024187	2099.39	-0.801122	0.300823	-2.6631	0.00774237	0.0255879
FBgn0028474	2309.65	-0.800924	0.250427	-3.19823	0.00138274	0.00599461
FBgn0039776	1946.73	-0.800468	0.259003	-3.09057	0.00199771	0.00817774
FBgn0036341	2073.23	-0.797152	0.246027	-3.2401	0.00119489	0.00529352
FBgn0053116	561.809	-0.796893	0.305061	-2.61224	0.0089951	0.0289804
FBgn0011305	2465.34	-0.796766	0.270976	-2.94036	0.00327831	0.0124941
FBgn0036988	471.613	-0.796764	0.310327	-2.5675	0.0102436	0.0323454
FBgn0052685	4554.04	-0.796207	0.28355	-2.80799	0.00498519	0.0176067
FBgn0022344	1327.98	-0.795266	0.314387	-2.52958	0.01142	0.0353457
FBgn0041171	3675.3	-0.794881	0.274884	-2.8917	0.00383163	0.0142358
FBgn0025781	395.045	-0.792033	0.307405	-2.57652	0.0099801	0.0316229
FBgn0033951	427.571	-0.791885	0.287655	-2.7529	0.00590705	0.0202545
FBgn0038686	1235.24	-0.791666	0.239675	-3.30308	0.000956284	0.00435645
FBgn0037188	1128.82	-0.789926	0.27659	-2.85595	0.00429088	0.0155153
FBgn0030434	887.725	-0.788035	0.261118	-3.01793	0.00254508	0.0101009
FBgn0052451	2522.18	-0.787975	0.263189	-2.99395	0.00275389	0.0108055
FBgn0028476	1479.35	-0.787701	0.26697	-2.95053	0.00317232	0.0121409
FBgn0250868	559.721	-0.787349	0.323222	-2.43594	0.0148532	0.0437791
FBgn0286027	500.986	-0.784756	0.285466	-2.74903	0.00597715	0.0204754
FBgn0036136	1578.48	-0.782302	0.301822	-2.59193	0.00954381	0.0304433
FBgn0023174	5817.2	-0.782021	0.263659	-2.96604	0.00301665	0.0116306
FBgn0036052	633.237	-0.78052	0.260804	-2.99275	0.00276476	0.0108274
FBgn0028684	5619.44	-0.779707	0.257105	-3.03264	0.00242428	0.00967059
FBgn0024352	2918.08	-0.77967	0.263	-2.96452	0.00303154	0.0116757
FBgn0010238	2626.96	-0.779038	0.254991	-3.05516	0.00224939	0.00904886
FBgn0038652	1877.07	-0.778202	0.318396	-2.44413	0.0145203	0.043053
FBgn0040396	1987.38	-0.777193	0.254986	-3.04798	0.00230385	0.00925093
FBgn0020261	2613.95	-0.775859	0.304806	-2.54542	0.0109146	0.0340803
FBgn0004957	667.162	-0.775193	0.281565	-2.75316	0.00590238	0.020251
FBgn0000119	2347.09	-0.77416	0.299466	-2.58514	0.00973396	0.0309506
FBgn0043900	1299.67	-0.773731	0.316593	-2.44393	0.0145283	0.0430651
FBgn0020622	1493.46	-0.772912	0.310892	-2.48611	0.0129148	0.03912
FBgn0034308	1740.46	-0.772903	0.277083	-2.78943	0.00528011	0.0184635
FBgn0033476	4402.32	-0.772543	0.275236	-2.80684	0.00500305	0.0176641
FBgn0038504	1801.16	-0.771975	0.283423	-2.72375	0.00645446	0.0219047
FBgn0033185	282.409	-0.771405	0.301142	-2.5616	0.0104192	0.0328239
FBgn0261020	1830.18	-0.770157	0.238962	-3.22292	0.0012689	0.00557398
FBgn0030349	4322.65	-0.76957	0.284515	-2.70485	0.00683352	0.0229671
FBgn0037580	5937.37	-0.769418	0.24863	-3.09463	0.00197061	0.00808801
FBgn0033987	2692.74	-0.768181	0.282158	-2.72252	0.00647866	0.0219664
FBgn0031566	2147.24	-0.762546	0.244502	-3.11877	0.00181605	0.00754018
FBgn0036811	556.006	-0.761515	0.314602	-2.42056	0.0154965	0.0453385
FBgn0033886	7250.3	-0.761051	0.246224	-3.09089	0.00199557	0.00817205
FBgn0028836	1337.68	-0.760908	0.242558	-3.13701	0.0017068	0.00716384
FBgn0015075	1159.61	-0.760604	0.288968	-2.63214	0.00848497	0.0275724
FBgn0030314	794.973	-0.759834	0.26842	-2.83076	0.00464368	0.0165935
FBgn0034210	371.796	-0.756681	0.28863	-2.62163	0.00875097	0.0282938
FBgn0032216	3632.76	-0.756524	0.290371	-2.60537	0.00917752	0.0294899
FBgn0027539	968.808	-0.755489	0.261102	-2.89346	0.00381018	0.0141851
FBgn0029133	2931.98	-0.75514	0.281153	-2.68587	0.00723423	0.0241538
FBgn0030521	18265.9	-0.7525	0.237919	-3.16284	0.00156236	0.0066443
FBgn0270924	2334.06	-0.752281	0.253614	-2.96624	0.00301461	0.0116269
FBgn0030788	1227.37	-0.750444	0.280953	-2.67106	0.00756111	0.0250997
FBgn0037391	2569.7	-0.750261	0.231058	-3.24706	0.00116602	0.00518662
FBgn0035827	1066.25	-0.749856	0.301859	-2.48413	0.012987	0.039295
FBgn0029778	805.28	-0.748452	0.261377	-2.8635	0.00418992	0.0152459
FBgn0283503	892.825	-0.747315	0.305121	-2.44924	0.0143159	0.0425739
FBgn0036740	2614.14	-0.747271	0.273439	-2.73286	0.00627876	0.0213881
FBgn0015001	1168.97	-0.747071	0.2645	-2.82446	0.00473604	0.0168794
FBgn0037573	1506.9	-0.746862	0.290286	-2.57284	0.0100867	0.0318867
FBgn0028421	1372.28	-0.7464	0.255627	-2.91988	0.00350172	0.0132125
FBgn0267351	1000.99	-0.746081	0.256617	-2.90737	0.00364482	0.0136647
FBgn0032812	1068.24	-0.742443	0.304476	-2.43843	0.0147514	0.0435494
FBgn0039068	364.381	-0.741317	0.279554	-2.65179	0.00800671	0.026268
FBgn0261789	1541.39	-0.739516	0.30026	-2.46292	0.0137811	0.0412473
FBgn0033486	1394.6	-0.738971	0.282947	-2.6117	0.00900941	0.0290179
FBgn0260771	405.284	-0.735887	0.264219	-2.78514	0.00535049	0.0186916
FBgn0038304	1033.79	-0.735412	0.291523	-2.52266	0.0116472	0.0358556
FBgn0040308	578.071	-0.730153	0.2865	-2.54853	0.0108179	0.0338269
FBgn0015372	1209.67	-0.729868	0.238869	-3.05551	0.00224676	0.00904446
FBgn0031768	877.201	-0.729484	0.272192	-2.68004	0.00736133	0.0245109
FBgn0038388	1768.29	-0.728845	0.280721	-2.59633	0.00942251	0.0301443
FBgn0034796	1396.23	-0.728209	0.30628	-2.3776	0.0174259	0.0499543
FBgn0260941	1480.02	-0.726978	0.286874	-2.53413	0.0112725	0.0349487
FBgn0038638	1540.43	-0.726976	0.278154	-2.61357	0.00896005	0.0288845
FBgn0030320	910.693	-0.72533	0.280418	-2.5866	0.00969278	0.0308645
FBgn0033028	2074.98	-0.724414	0.238947	-3.03169	0.0024319	0.00969039
FBgn0031397	408.378	-0.723856	0.285962	-2.5313	0.0113639	0.0352044
FBgn0028894	543.83	-0.720743	0.27844	-2.5885	0.00963951	0.0307217
FBgn0033199	667.11	-0.720624	0.276903	-2.60244	0.00925622	0.0296992
FBgn0010416	1275.57	-0.719091	0.258352	-2.78337	0.00537968	0.0187697
FBgn0011225	6480.7	-0.719068	0.291599	-2.46595	0.0136652	0.0409395
FBgn0011232	2014.24	-0.718358	0.278263	-2.58158	0.00983479	0.0312258
FBgn0037084	641.514	-0.716377	0.269332	-2.65983	0.00781796	0.0257569
FBgn0035901	468.805	-0.716356	0.272956	-2.62444	0.00867913	0.0281031
FBgn0020389	2435.2	-0.71605	0.273076	-2.62216	0.00873742	0.0282584
FBgn0267821	2526.45	-0.715986	0.251925	-2.84206	0.00448228	0.0160956
FBgn0283468	2176.14	-0.715058	0.236968	-3.01753	0.00254843	0.0101105
FBgn0002781	5527.92	-0.714769	0.262779	-2.72004	0.0065274	0.0221043
FBgn0037918	2655.26	-0.714405	0.267615	-2.66952	0.00759594	0.0251924
FBgn0000117	11242.5	-0.71425	0.278522	-2.56443	0.0103345	0.0325948
FBgn0038617	917.131	-0.71398	0.293293	-2.43436	0.0149182	0.0439353
FBgn0028507	815.701	-0.71203	0.285768	-2.49163	0.0127157	0.0386239
FBgn0032026	2257.85	-0.711094	0.255383	-2.78442	0.0053624	0.0187153
FBgn0261279	3161.14	-0.710208	0.239394	-2.96669	0.00301027	0.0116142
FBgn0029820	2080.82	-0.710172	0.246986	-2.87536	0.00403571	0.014841
FBgn0036848	1410.25	-0.708075	0.274042	-2.58382	0.00977128	0.0310602
FBgn0038576	557.171	-0.706962	0.289611	-2.44108	0.0146435	0.0432861
FBgn0261854	1422	-0.706012	0.289181	-2.44142	0.0146297	0.043272
FBgn0029088	943.394	-0.705227	0.270247	-2.60956	0.00906576	0.0291822
FBgn0261437	356.286	-0.703684	0.29449	-2.3895	0.0168713	0.0485883
FBgn0029824	3423.12	-0.701702	0.286592	-2.44844	0.0143478	0.0426178
FBgn0260936	4177.15	-0.699786	0.230029	-3.04217	0.00234881	0.00940385
FBgn0030805	392.645	-0.698892	0.287661	-2.42957	0.0151169	0.0444007
FBgn0015509	5080.92	-0.697994	0.231738	-3.012	0.00259535	0.0102817
FBgn0023517	1528.47	-0.697279	0.286751	-2.43165	0.0150301	0.0441933
FBgn0038747	2809.54	-0.696044	0.272897	-2.55058	0.0107545	0.0337056
FBgn0026598	624.123	-0.695064	0.276081	-2.51761	0.0118156	0.0362804
FBgn0035540	890.592	-0.693428	0.25007	-2.77294	0.00555531	0.0192413
FBgn0000721	9172.45	-0.692764	0.253997	-2.72745	0.00638262	0.0216878
FBgn0261456	1727.22	-0.692596	0.226618	-3.05623	0.00224136	0.00903247
FBgn0029736	2032.78	-0.69221	0.276181	-2.50636	0.0121981	0.0372378
FBgn0067783	377.889	-0.69198	0.273876	-2.52662	0.0115166	0.035524
FBgn0031284	282.698	-0.691389	0.28839	-2.39741	0.0165116	0.047766
FBgn0086683	1360.34	-0.689408	0.275439	-2.50294	0.0123166	0.0375679
FBgn0025742	2134.02	-0.688003	0.274798	-2.50367	0.0122914	0.0375016
FBgn0035107	2320.28	-0.687834	0.26005	-2.645	0.00816905	0.0267044
FBgn0015359	589.897	-0.686848	0.276137	-2.48735	0.01287	0.0390168
FBgn0031670	2347.73	-0.686674	0.270717	-2.5365	0.0111966	0.0347723
FBgn0031969	1456.75	-0.685594	0.272817	-2.51302	0.0119702	0.0366752
FBgn0035091	3218.22	-0.683858	0.256156	-2.66969	0.00759205	0.0251871
FBgn0050423	2580.85	-0.682881	0.282324	-2.41878	0.0155725	0.0454946
FBgn0262937	1471.18	-0.68133	0.260262	-2.61786	0.00884831	0.0285748
FBgn0263351	2987.41	-0.679025	0.261781	-2.59386	0.0094905	0.030291
FBgn0036402	1223.96	-0.677388	0.236183	-2.86806	0.00412994	0.0150882
FBgn0031149	5280.23	-0.677028	0.271147	-2.4969	0.0125285	0.0381293
FBgn0032000	963.981	-0.676376	0.270728	-2.49836	0.0124769	0.0380146
FBgn0001139	3215.21	-0.671383	0.251673	-2.66768	0.00763773	0.0253079
FBgn0260817	577.265	-0.671177	0.27955	-2.40092	0.0163538	0.0473973
FBgn0037700	1088.23	-0.668868	0.278631	-2.40055	0.0163703	0.0474327
FBgn0032783	1190.62	-0.665582	0.269273	-2.47178	0.0134444	0.0404212
FBgn0034982	1247.58	-0.663701	0.271799	-2.44189	0.0146108	0.0432529
FBgn0034371	703.027	-0.663062	0.265761	-2.49495	0.0125975	0.0383072
FBgn0027873	789.294	-0.659516	0.238788	-2.76192	0.00574619	0.0197896
FBgn0040080	1641.8	-0.658125	0.260974	-2.5218	0.0116755	0.0359129
FBgn0037339	2129.98	-0.657969	0.276629	-2.37852	0.0173822	0.0498627
FBgn0034750	1138.89	-0.657371	0.26835	-2.44968	0.0142985	0.0425337
FBgn0031143	2051.78	-0.657364	0.245827	-2.67409	0.00749321	0.0248894
FBgn0037207	1151.7	-0.656866	0.246769	-2.66187	0.00777088	0.0256404
FBgn0051694	5700.29	-0.655691	0.24433	-2.68363	0.00728276	0.024301
FBgn0284421	1672.32	-0.653676	0.238961	-2.73549	0.00622867	0.0212504
FBgn0283535	9541.75	-0.651316	0.259919	-2.50584	0.0122159	0.0372817
FBgn0035421	1175.53	-0.65122	0.267796	-2.43177	0.015025	0.0441903
FBgn0039402	2894.46	-0.645624	0.244709	-2.63834	0.00833138	0.0271539
FBgn0027558	1092.22	-0.640315	0.24751	-2.58702	0.00968093	0.0308358
FBgn0034961	626.661	-0.639687	0.263085	-2.43149	0.015037	0.0442016
FBgn0038666	475.099	-0.632455	0.255428	-2.47605	0.0132843	0.0399956
FBgn0039261	2005.22	-0.630439	0.254517	-2.477	0.0132493	0.039912
FBgn0004387	2857.2	-0.628111	0.263267	-2.38583	0.0170406	0.0489985
FBgn0037094	6201.85	-0.627404	0.248717	-2.52256	0.0116503	0.0358556
FBgn0263603	3756.24	-0.627372	0.248762	-2.52198	0.0116696	0.0359048
FBgn0038404	560.836	-0.62635	0.252614	-2.47947	0.0131576	0.0396796
FBgn0027342	826.688	-0.62174	0.239723	-2.59358	0.0094982	0.0303067
FBgn0029092	10595.5	-0.616524	0.255154	-2.41629	0.0156798	0.0457714
FBgn0029911	2045.42	-0.615682	0.224728	-2.73968	0.00614998	0.0210017
FBgn0002783	4054.3	-0.61482	0.251748	-2.44221	0.0145978	0.0432359
FBgn0010422	1625.27	-0.605263	0.238462	-2.53819	0.0111427	0.0346542
FBgn0034674	1086.61	-0.588276	0.23957	-2.45555	0.0140671	0.0419233
FBgn0036974	6113.03	-0.587868	0.23245	-2.52901	0.0114385	0.0353726
FBgn0267378	3080.44	-0.586337	0.230558	-2.54312	0.0109867	0.0342568
FBgn0030996	1605.26	-0.577796	0.238349	-2.42416	0.0153441	0.0449834
FBgn0020767	2153.13	-0.577633	0.232334	-2.48622	0.0129108	0.0391187
FBgn0001218	31248.9	-0.576744	0.223455	-2.58103	0.0098506	0.0312669
FBgn0034181	5729.84	-0.568715	0.223152	-2.54856	0.0108169	0.0338269
FBgn0039690	2272.36	-0.565418	0.232806	-2.42871	0.0151527	0.044482
FBgn0003969	2128.59	-0.560814	0.221896	-2.52738	0.0114918	0.0354711
FBgn0010774	6151.48	-0.558533	0.233057	-2.39656	0.0165499	0.0478264
FBgn0023529	6791.42	0.582089	0.222679	2.61403	0.00894821	0.0288548
FBgn0003884	123723	0.594095	0.248269	2.39295	0.0167135	0.0482227
FBgn0011509	1300.04	0.594607	0.245605	2.42099	0.0154784	0.0453045
FBgn0037439	1089.99	0.596338	0.245534	2.42874	0.0151515	0.044482
FBgn0039882	1288.58	0.598095	0.23704	2.52318	0.0116299	0.03583
FBgn0038145	11435	0.600102	0.243094	2.4686	0.0135641	0.0407035
FBgn0011771	1531.95	0.60414	0.248616	2.43001	0.0150985	0.0443586
FBgn0000261	23083.8	0.60494	0.234688	2.57763	0.00994797	0.0315485
FBgn0041191	2990.16	0.614571	0.253582	2.42356	0.0153694	0.0450456
FBgn0262518	2795.13	0.61648	0.258795	2.38212	0.0172135	0.0494436
FBgn0030109	1801.89	0.61665	0.231564	2.66298	0.00774518	0.0255879
FBgn0038206	1324.44	0.620662	0.252604	2.45706	0.014008	0.0417719
FBgn0053113	14521.5	0.62298	0.252949	2.46287	0.0137831	0.0412473
FBgn0051550	2830.65	0.623486	0.255331	2.44187	0.0146114	0.0432529
FBgn0031816	1707.48	0.630554	0.265013	2.37933	0.017344	0.0497661
FBgn0038829	2810.7	0.637854	0.229473	2.77965	0.00544172	0.0189438
FBgn0037138	4217.11	0.63971	0.237451	2.69406	0.00705865	0.023647
FBgn0028427	3581.24	0.641317	0.256568	2.4996	0.0124334	0.0379033
FBgn0030344	1157.5	0.642497	0.266197	2.41362	0.015795	0.0460463
FBgn0028662	9659.57	0.642527	0.268043	2.3971	0.0165253	0.0477806
FBgn0025582	9177.77	0.643024	0.25829	2.48954	0.0127909	0.0387983
FBgn0026479	3413.88	0.64799	0.271011	2.39101	0.0168021	0.0484137
FBgn0032198	3788.99	0.650847	0.264673	2.45906	0.0139302	0.0416079
FBgn0015834	9061.95	0.652782	0.259295	2.51753	0.0118182	0.0362804
FBgn0260747	4798.92	0.65466	0.260679	2.51137	0.0120264	0.036806
FBgn0030529	2512.22	0.656738	0.238013	2.75925	0.00579338	0.0199208
FBgn0261274	1266.26	0.659165	0.238557	2.76313	0.00572498	0.0197414
FBgn0035252	1601.96	0.659822	0.277514	2.37761	0.017425	0.0499543
FBgn0266696	8631.76	0.661597	0.277253	2.38626	0.0170207	0.048954
FBgn0021979	10329.2	0.663006	0.2256	2.93886	0.00329422	0.0125417
FBgn0004914	2293.93	0.664953	0.260252	2.55503	0.0106177	0.0333307
FBgn0034141	1931.29	0.664998	0.268538	2.47636	0.0132729	0.0399721
FBgn0284253	2186.19	0.666867	0.277675	2.40161	0.0163232	0.0473212
FBgn0035321	2382.25	0.667438	0.247357	2.69828	0.00696991	0.0233712
FBgn0036376	2096.81	0.667764	0.252042	2.64941	0.00806325	0.0264139
FBgn0033631	3997.03	0.670217	0.263889	2.53977	0.0110925	0.0345375
FBgn0036279	1961.55	0.670874	0.27959	2.39949	0.016418	0.0475521
FBgn0003117	896.73	0.672378	0.275153	2.44365	0.0145394	0.0430748
FBgn0031995	4112.51	0.674923	0.277745	2.43001	0.0150983	0.0443586
FBgn0051038	3625.55	0.676661	0.277145	2.44154	0.0146248	0.0432692
FBgn0039543	2443.65	0.687452	0.267887	2.5662	0.0102818	0.032438
FBgn0263391	4189.86	0.689816	0.267655	2.57726	0.00995871	0.0315734
FBgn0051116	2013.14	0.689962	0.282077	2.44601	0.0144448	0.0428665
FBgn0031637	6730.13	0.690086	0.268566	2.56952	0.0101839	0.0321756
FBgn0020620	1578.76	0.690419	0.264017	2.61506	0.00892125	0.0287764
FBgn0017545	63178.5	0.692178	0.275963	2.50823	0.0121338	0.0370828
FBgn0000083	14890.4	0.693401	0.280565	2.47144	0.0134569	0.0404263
FBgn0026059	7639.97	0.693845	0.289394	2.39758	0.0165037	0.0477558
FBgn0032845	502.093	0.69452	0.288173	2.41009	0.0159488	0.0463957
FBgn0032015	2326.64	0.695105	0.274863	2.52891	0.0114416	0.0353726
FBgn0032264	1926.09	0.696863	0.291119	2.39374	0.0166777	0.0481576
FBgn0001942	83933.7	0.697556	0.24253	2.87616	0.00402548	0.0148111
FBgn0020510	1651.43	0.69791	0.289491	2.41082	0.0159169	0.0463152
FBgn0024222	767.923	0.700096	0.25937	2.69922	0.00695028	0.0233268
FBgn0035137	1503.32	0.700432	0.285038	2.45733	0.0139975	0.0417552
FBgn0004907	20271.4	0.701778	0.266244	2.63584	0.00839283	0.027329
FBgn0033129	579.993	0.705652	0.294628	2.39506	0.0166175	0.0480091
FBgn0261862	8724.44	0.706349	0.274456	2.57363	0.0100637	0.0318509
FBgn0052982	1678.26	0.707305	0.269136	2.62805	0.00858748	0.0278641
FBgn0038720	3697.5	0.708038	0.277993	2.54696	0.0108664	0.0339534
FBgn0004611	1639.44	0.70918	0.284497	2.49275	0.0126759	0.0385243
FBgn0032117	295.159	0.709351	0.287388	2.46827	0.0135768	0.0407303
FBgn0024889	1487.53	0.713224	0.241786	2.94982	0.00317959	0.012156
FBgn0004926	6314.3	0.714175	0.228505	3.12542	0.00177552	0.00741097
FBgn0040239	1614.41	0.715694	0.233237	3.06853	0.00215114	0.00871773
FBgn0265262	1401.31	0.715895	0.239899	2.98415	0.00284365	0.0110808
FBgn0038473	1080.32	0.717754	0.279626	2.56684	0.010263	0.0323973
FBgn0034643	2866.76	0.719336	0.250984	2.86606	0.00415618	0.0151433
FBgn0052280	2371.75	0.720002	0.245959	2.92733	0.00341888	0.0129532
FBgn0022023	10922.1	0.720909	0.272033	2.65008	0.00804736	0.0263697
FBgn0034970	1510.08	0.721334	0.271707	2.65482	0.00793501	0.026064
FBgn0011336	5193.87	0.726619	0.249096	2.91702	0.00353394	0.0133199
FBgn0001297	8410.52	0.727619	0.26223	2.77474	0.00552458	0.0191713
FBgn0027093	1155.44	0.727959	0.238892	3.04723	0.00230958	0.00926712
FBgn0025352	9874.44	0.730367	0.285558	2.55768	0.0105372	0.0331099
FBgn0016041	1193.67	0.731584	0.276406	2.64677	0.00812634	0.0265966
FBgn0262736	47765.4	0.73238	0.258824	2.82965	0.00465993	0.0166406
FBgn0014184	40641.8	0.732386	0.275014	2.66308	0.0077428	0.0255879
FBgn0028540	1109.41	0.734192	0.256751	2.85955	0.00424247	0.0153911
FBgn0005659	1392.55	0.735054	0.28723	2.55911	0.0104941	0.0330126
FBgn0016078	1461.6	0.737186	0.248317	2.96872	0.00299041	0.0115498
FBgn0037566	748.141	0.739533	0.293373	2.5208	0.0117089	0.0359853
FBgn0037638	604.081	0.741128	0.25838	2.86837	0.00412599	0.0150882
FBgn0020249	3998.43	0.741538	0.258055	2.87356	0.00405875	0.0148975
FBgn0010292	652.588	0.741634	0.307173	2.41439	0.0157617	0.0459616
FBgn0038195	1892.36	0.742464	0.255756	2.90302	0.00369585	0.0138206
FBgn0032919	1600.73	0.746657	0.246157	3.03326	0.0024193	0.00965777
FBgn0053303	3429.12	0.748054	0.260376	2.87297	0.00406628	0.0149151
FBgn0266446	21239.1	0.748495	0.286484	2.6127	0.00898313	0.0289504
FBgn0010015	1196.09	0.748837	0.313417	2.38927	0.0168821	0.0486066
FBgn0029131	1844.71	0.749667	0.243386	3.08015	0.00206895	0.00841272
FBgn0038893	363.93	0.750331	0.293239	2.55877	0.0105043	0.0330256
FBgn0034501	12694.4	0.750872	0.298676	2.514	0.0119371	0.0365941
FBgn0039757	82474.9	0.75349	0.261926	2.87673	0.00401824	0.0147935
FBgn0264707	1083.68	0.757025	0.270631	2.79726	0.0051538	0.0181203
FBgn0027654	1486.42	0.757684	0.239435	3.16446	0.0015537	0.0066229
FBgn0011230	10526.2	0.758149	0.298336	2.54126	0.0110455	0.0344301
FBgn0034214	454.768	0.759482	0.264697	2.86925	0.00411451	0.0150668
FBgn0037102	974.658	0.761814	0.286293	2.66096	0.00779184	0.0256863
FBgn0023001	1848.03	0.764694	0.275732	2.77332	0.00554872	0.0192306
FBgn0036213	53454.9	0.765949	0.270675	2.82977	0.00465808	0.0166395
FBgn0035251	2583.18	0.766203	0.264715	2.89445	0.00379829	0.0141553
FBgn0031213	2840.29	0.766696	0.294552	2.60293	0.0092432	0.0296748
FBgn0032409	615.269	0.767544	0.296818	2.58591	0.00971235	0.0309089
FBgn0000394	825.249	0.767909	0.299884	2.56068	0.0104467	0.0328917
FBgn0035390	2563.28	0.76809	0.24591	3.12345	0.00178742	0.00744509
FBgn0035490	840.36	0.76811	0.321567	2.38864	0.0169107	0.048676
FBgn0015872	2943.97	0.769391	0.241856	3.18119	0.00146672	0.00630372
FBgn0021760	2940.78	0.770073	0.313922	2.45307	0.0141643	0.0421805
FBgn0035501	3981.81	0.772625	0.270308	2.85832	0.00425893	0.0154252
FBgn0265003	1937.61	0.773827	0.249387	3.10292	0.00191622	0.00788847
FBgn0003867	1630.01	0.77593	0.285908	2.71391	0.00664933	0.0224546
FBgn0035383	1549.51	0.776616	0.282872	2.74547	0.00604241	0.0206731
FBgn0015925	364.917	0.777094	0.284647	2.73003	0.00633294	0.0215391
FBgn0031855	1156.68	0.778163	0.252033	3.08755	0.00201815	0.00824669
FBgn0035766	1827.57	0.779072	0.262715	2.96546	0.00302226	0.0116441
FBgn0034748	417.939	0.781302	0.281719	2.77334	0.00554845	0.0192306
FBgn0262035	2169.25	0.781451	0.326616	2.39257	0.0167309	0.0482602
FBgn0036892	1268.99	0.781835	0.251641	3.10695	0.00189031	0.00780235
FBgn0002733	1231.06	0.783091	0.307466	2.54692	0.0108677	0.0339534
FBgn0031973	2394.96	0.783857	0.300903	2.60502	0.00918694	0.0295115
FBgn0001565	5300.9	0.783999	0.250976	3.1238	0.00178532	0.00744014
FBgn0283478	6616.38	0.784714	0.248321	3.16009	0.00157722	0.00669967
FBgn0001941	3512.79	0.78556	0.28046	2.80097	0.00509495	0.0179365
FBgn0033668	1548.64	0.786998	0.261664	3.00767	0.00263259	0.0103992
FBgn0038834	51815.1	0.787009	0.274351	2.86863	0.00412258	0.0150882
FBgn0003388	3630.55	0.791623	0.2967	2.66809	0.0076284	0.0252847
FBgn0262473	2894.96	0.791668	0.27874	2.84017	0.00450901	0.0161863
FBgn0270927	705.602	0.794191	0.292515	2.71504	0.00662677	0.0223991
FBgn0035753	50273	0.79428	0.300445	2.64368	0.0082011	0.0267932
FBgn0003321	3516.27	0.794953	0.294608	2.69834	0.00696859	0.0233712
FBgn0036993	278.897	0.798017	0.300805	2.65294	0.00797937	0.026194
FBgn0033996	848.782	0.798676	0.3042	2.62549	0.00865234	0.028033
FBgn0039754	1242.86	0.799976	0.316434	2.5281	0.0114682	0.0354247
FBgn0029959	1014.55	0.801658	0.267586	2.99589	0.00273647	0.0107474
FBgn0031055	1729.64	0.805054	0.265502	3.03219	0.00242784	0.00967772
FBgn0027607	3577.37	0.807208	0.297227	2.71579	0.00661169	0.0223689
FBgn0004456	3323.2	0.807368	0.316573	2.55034	0.0107618	0.0337092
FBgn0020493	1134.18	0.807895	0.282292	2.86191	0.00421097	0.0153073
FBgn0038742	4362.1	0.808565	0.275244	2.93763	0.00330735	0.0125785
FBgn0266124	919.537	0.809994	0.296462	2.7322	0.00629133	0.0214242
FBgn0038198	1479.64	0.812869	0.305295	2.66257	0.00775466	0.0255946
FBgn0263133	362.045	0.813231	0.330028	2.46413	0.0137346	0.0411248
FBgn0030749	2284.54	0.814168	0.286753	2.83926	0.0045218	0.0162162
FBgn0033184	1714.29	0.814308	0.334479	2.43455	0.0149101	0.0439232
FBgn0027835	25240.8	0.814652	0.313117	2.60175	0.00927485	0.0297415
FBgn0013720	2287.34	0.815995	0.235788	3.46071	0.000538748	0.00267127
FBgn0028360	1703.47	0.820446	0.292844	2.80165	0.00508414	0.0179041
FBgn0036927	1118.42	0.820614	0.280466	2.9259	0.00343466	0.0129994
FBgn0035057	344.363	0.821975	0.338735	2.4266	0.0152409	0.0447171
FBgn0030478	9034.47	0.824922	0.331024	2.49203	0.0127014	0.038591
FBgn0052344	969.142	0.825226	0.25412	3.24739	0.00116467	0.00518485
FBgn0286783	4814.01	0.825806	0.29502	2.79915	0.00512373	0.0180262
FBgn0033539	809.357	0.826149	0.302258	2.73326	0.00627116	0.0213688
FBgn0039132	1532.94	0.826811	0.288383	2.86706	0.00414309	0.0151208
FBgn0052939	201.973	0.828954	0.337204	2.45832	0.0139589	0.041671
FBgn0037298	5661.3	0.8291	0.319594	2.59423	0.00948023	0.0302759
FBgn0034194	1215.81	0.836005	0.298979	2.7962	0.00517081	0.0181568
FBgn0045823	21628.5	0.836286	0.284829	2.9361	0.00332363	0.0126273
FBgn0010620	3177.59	0.836394	0.298431	2.80264	0.00506869	0.0178613
FBgn0010786	2096.11	0.837559	0.267439	3.13178	0.0017375	0.00727874
FBgn0003206	3951.41	0.837588	0.26728	3.13375	0.00172587	0.00723277
FBgn0031473	274.106	0.838883	0.313524	2.67566	0.0074582	0.0247957
FBgn0032897	6948.35	0.840095	0.275017	3.0547	0.00225287	0.00905951
FBgn0036035	427.876	0.841001	0.345056	2.43729	0.0147978	0.0436511
FBgn0035452	2767.15	0.841032	0.243005	3.46096	0.000538244	0.00266998
FBgn0029891	8764.61	0.842042	0.310934	2.70811	0.0067668	0.022788
FBgn0036741	773.468	0.84494	0.291783	2.89578	0.0037822	0.0141049
FBgn0265959	389.035	0.845168	0.347311	2.43346	0.0149552	0.0440324
FBgn0027581	281.76	0.847508	0.349964	2.4217	0.0154482	0.045228
FBgn0011754	2754.43	0.851063	0.280758	3.0313	0.00243501	0.00969923
FBgn0037215	2834.27	0.85152	0.295563	2.88101	0.00396398	0.014648
FBgn0034741	2945.26	0.853528	0.354666	2.40657	0.0161031	0.0467577
FBgn0036258	7425.02	0.855243	0.227819	3.75404	0.000174004	0.000994909
FBgn0027780	308.056	0.855485	0.328778	2.60201	0.00926786	0.0297278
FBgn0051431	982.775	0.856724	0.302524	2.83192	0.004627	0.0165392
FBgn0034893	429.399	0.857659	0.344853	2.48703	0.0128815	0.0390408
FBgn0005674	5293.41	0.860978	0.311388	2.76497	0.00569284	0.0196492
FBgn0038752	1106.7	0.862129	0.311838	2.76467	0.0056981	0.0196611
FBgn0029688	5443.03	0.862466	0.26132	3.30042	0.00096541	0.00439071
FBgn0031959	290.361	0.862945	0.339841	2.53926	0.0111087	0.034578
FBgn0038037	7414.37	0.863314	0.281876	3.06275	0.00219314	0.0088715
FBgn0259178	378.571	0.863804	0.333979	2.58641	0.00969825	0.030873
FBgn0268063	2374.05	0.864355	0.309291	2.79463	0.00519586	0.0182213
FBgn0036659	3713	0.866034	0.359525	2.40883	0.0160038	0.0465432
FBgn0043806	793.772	0.86812	0.269881	3.21667	0.00129687	0.00567163
FBgn0050148	972.147	0.868593	0.299906	2.89622	0.00377689	0.0140899
FBgn0287725	1689.25	0.868645	0.321091	2.70529	0.00682454	0.0229471
FBgn0004620	606.316	0.868903	0.30169	2.88012	0.0039752	0.0146795
FBgn0037135	22942.1	0.869584	0.309458	2.81002	0.00495378	0.0175127
FBgn0030528	598.868	0.870692	0.292078	2.98103	0.00287282	0.0111587
FBgn0032521	727.483	0.871113	0.291427	2.98913	0.00279775	0.0109331
FBgn0036806	1700.19	0.871186	0.24409	3.56912	0.000358187	0.00189085
FBgn0037536	5512.55	0.87184	0.277152	3.1457	0.00165687	0.00698645
FBgn0035755	376.048	0.872137	0.308766	2.82459	0.00473416	0.0168782
FBgn0031170	1474.17	0.872657	0.304255	2.86818	0.00412842	0.0150882
FBgn0001186	5662.77	0.8748	0.291832	2.99761	0.00272102	0.0106982
FBgn0033982	164.501	0.876654	0.36605	2.3949	0.0166248	0.0480173
FBgn0082585	499.087	0.877278	0.346611	2.53102	0.0113732	0.0352208
FBgn0036990	596.863	0.877793	0.293192	2.99392	0.00275422	0.0108055
FBgn0035936	1925.17	0.879253	0.350713	2.50704	0.0121746	0.0371868
FBgn0035876	226.631	0.881258	0.322169	2.73539	0.00623057	0.0212504
FBgn0286813	3775.26	0.882245	0.33133	2.66274	0.00775078	0.0255903
FBgn0031457	696.744	0.882503	0.31951	2.76205	0.0057439	0.019788
FBgn0267828	2750.59	0.882665	0.296362	2.97833	0.00289821	0.0112493
FBgn0029155	2328	0.884715	0.317918	2.78284	0.00538856	0.0187887
FBgn0038774	9980.91	0.885295	0.367699	2.40767	0.0160548	0.0466422
FBgn0017578	642.647	0.886365	0.275453	3.21785	0.00129157	0.00565539
FBgn0033224	2752.1	0.889961	0.27847	3.1959	0.00139396	0.00603371
FBgn0010220	457.925	0.890483	0.267643	3.32712	0.000877478	0.00404802
FBgn0051678	1284.61	0.89182	0.279672	3.18881	0.0014286	0.00616414
FBgn0039789	1512.22	0.892054	0.247604	3.60274	0.000314882	0.00168337
FBgn0029506	9571.64	0.893772	0.274843	3.25194	0.0011462	0.00511513
FBgn0087013	27139.5	0.893946	0.355888	2.51187	0.0120092	0.0367637
FBgn0043070	4388.43	0.894541	0.25387	3.52362	0.000425697	0.00219522
FBgn0051549	1982.01	0.8949	0.373308	2.39722	0.0165202	0.0477784
FBgn0032512	918.55	0.895061	0.261721	3.41991	0.000626415	0.00304657
FBgn0030704	349.779	0.895182	0.360987	2.47981	0.0131451	0.0396637
FBgn0051781	4318.99	0.895484	0.314063	2.85129	0.00435423	0.0156976
FBgn0261989	2643.55	0.896919	0.277787	3.2288	0.00124313	0.00548943
[truncated: 1,817 more rows]
