# Supplementary material for: Sex-specific splicing occurs genome-wide during early Drosophila embryogenesis
Source: eLife. 2023 Jul 19;12:e87865. doi: 10.7554/eLife.87865 (PMC10400075; doi:10.7554/eLife.87865)
Supplement: Supplementary file 7. — (a–b) List of CLAMP (chromatin linked adapter for MSL proteins)-dependent male and female specifically spliced genes which are direct SXL targets (a). List of primers used to validate splicing events requiring CLAMP in Figure 2—figure supplement 3 (b). [file elife-87865-supp7.xlsx]

## Sheet: Table S7a
Sxl RNA targets:1406	Sxl directly binds to (88/407) CLAMP-dependent spliced genes:21.6%	55 common elements in "CLAMP dependent Female sex-specific spliced genes" and "Sxl RNA targets":	20 common elements in "CLAMP dependent Male sex-specific spliced genes" and "Sxl RNA targets":	13 common elements in "CLAMP dependent Male sex-specific spliced genes", "CLAMP dependent Female sex-specific spliced genes" and "Sxl RNA targets":
mt:ND4	spen	Csp	mRpS5	Sec16
mt:ND4L	msl-2	simj	S	Trf4-1
mt:ND1	Bsg25D	dbr	Asx	mud
mt:ND2	CG31886	CG5004	Map205	Ncoa6
mt:ND5	CG4658	aPKC	5PtaseI	Pep
sncRNA:CR43701	dl	Zyx	galectin	wech
mt:ND6	Df31	psq	UbcE2H	E2f1
lncRNA:CR43264	Vha16-1	Smr	CG32795	RhoGDI
mt:ATPase6	Uhg1	CG45050	pho	Top1
snRNA:U5:35D	Dgp-1	schlank	CG10948	Df31
mt:Cyt-b	simj	dco	CG10077	Ran
mt:ND3	CycA	CG5746	wnd	CG40191
CG42360	CG45050	Imp	CG30323	Vha55
asRNA:CR45139	rump	drk	CG6891
MED21	fray	fray	bab2
mt:CoI	E2f1	CG4022	Baldspot
CG17724	lqfR	Abl	Fer2LCH
Snx21	4E-T	mnb	Xrp1
snRNA:U7	Trf4-1	Naa60	ImpL2
asRNA:CR44029	bif	KdelR	Sesn
Mvd	Hsc70-3	CG8929
CG13358	Sec16	spi
CG10077	caz	l(3)05822
Met	CG9132	Rip11
Vmat	CG5004	Rbp1-like
brat	mnb	CG45049
Nrg	CG32512	Adf1
ave	galectin	spen
l(1)G0469	Sam-S	Btk29A
CG15211	S	wdb
lncRNA:CR42549	Ncoa6	CG11050
brk	Asx	brat
mt:CoII	CG10077	CG17724
CG6583	CG10948	CG17574
Sk1	Pep	CG9132
mt:CoIII	mRpS5	CG3638
CG11360	Vha55	flfl
Dsp1	5PtaseI	4E-T
Adar	Map205	Eaf
Rheb	pho	Drak
Cap-H2	CG32795	CG32512
lncRNA:CR43995	UbcE2H	CG4658
CG42394	dbr	rump
ogre	CG11050	Bsg25D
vri	Btk29A	dl
RhoGAP93B	KdelR	CycA
pxb	brat	lqfR
CG40228	spi	Hsc70-3
cdc14	CG40191	Uhg1
nmo	Adf1	bif
Taf5	Eaf	Vha16-1
CG34348	wech	caz
Ent1	psq	Dgp-1
lncRNA:CR44042	CG17574	msl-2
CG13766	CG17724	CG31886
inaE	drk
pigeon	aPKC
snRNA:U4:25F	CG8929
fzr	CG4022
sinu	Naa60
snk	Abl
lncRNA:CR44953	RhoGDI
ubl	Csp
CG1673	flfl
Nf-YB	l(3)05822
mei-W68	CG45049
vn	CG5746
Mnt	wdb
CG4455	dco
CG13609	Zyx
msl-2	CG3638
CG12728	schlank
CG9636	Imp
Kpc1	Ran
sbr	Drak
CG14435	Smr
lncRNA:CR43963	Rbp1-like
mew	mud
scaf	Top1
CG42258	Rip11
Rac2	CG30323
usp	Sesn
Pc	bab2
orb2	ImpL2
Taf12	Baldspot
Zip88E	wnd
lncRNA:CR45433	Xrp1
sno	Fer2LCH
CG32700	CG6891
EMC2A
Tsp96F
5PtaseI
lncRNA:CR33963
α-Man-Ia
Maf1
CG32428
CG4949
csw
Rab23
org-1
CG1227
glec
Syx6
Tnpo
tut
CG31922
lncRNA:CR45517
Eip74EF
PR-Set7
Flo2
CG42240
Dok
Cf2
Drak
spoon
babo
MICU3
upd3
NFAT
CG12123
CG15387
CG12470
lncRNA:CR43958
Orc6
CG1360
DnaJ-1
scyl
CG7369
ste14
INPP5E
CG45071
emc
Myo95E
Efr
Syp
CG2865
Uros1
Mgat4a
EMC2B
asRNA:CR45126
CG32767
Hsc20
X11Lβ
CG6700
lncRNA:CR46006
asRNA:CR45189
Cyp6v1
Pur-α
PRL-1
elav
fray
Cds
CG16986
tmod
unc79
dbo
lncRNA:CR32582
Spps
lili
Dsor1
CG7083
sowah
Rab26
CG3635
CG34250
Hr39
CG31712
ap
cal1
lncRNA:CR41257
smg
Vav
CG6791
Fis1
pcs
zld
PIG-Q
CG7650
Ir76a
MAPk-Ak2
Rab35
Rip11
CG12713
Gem2
CG2201
h
CG4766
orb
nrm
Rab30
Imp
Nf-YA
CG32512
Dyrk3
slpr
lncRNA:CR45054
Leash
VhaM9.7-b
tws
Lasp
CG4239
CG10413
nonA
ari-1
CG17977
GMF
CG6762
CG8671
lncRNA:CR34335
Notum
Sur-8
CASK
twin
CG6425
CG32066
Wee1
CG12547
cad
CG11560
CG4928
asRNA:CR44053
Atg12
Zdhhc8
chrb
Pi3K21B
prage
CG42376
dap
lncRNA:CR43967
Atf3
Axs
CG7156
stg
norpA
Gpdh1
Arp2
spartin
Fit1
Rubicon
CG31635
Paip2
CG12945
spdi
CG2126
CG42233
Pdk1
MCU
Kat60
pre-mod(mdg4)-N
REPTOR
LBR
Tob
CG6983
CG12567
br
CG32579
puc
Evi5
Trs20
MFS17
lncRNA:CR44619
CG8944
CG11883
CG34195
GstT1
yuri
Asator
Pka-C1
CG32984
MED6
PPP4R2r
IP3K2
Taf4
hdc
Pvf1
CG2321
stas
Clic
Cka
tth
Su(var)3-9
NijA
stx
lncRNA:CR44809
Tmem63
CG10494
AP-1γ
CG9855
Kr-h1
Polr2K
Ptp4E
Paf-AHα
CG5004
Syx4
lncRNA:CR43493
Tsf2
CG1492
Myo61F
CG32795
cv-2
CenG1A
CG13896
CG16743
caz
Nipsnap
Atg4b
CrebA
BCL7-like
M6
Rap2l
GlcAT-I
mex1
hng2
CG15535
CycE
Alg-2
fl(2)d
Ccdc58
InR
mxt
asRNA:CR44027
viaf
Ctr1A
mthl3
Wdr81
dtn
mei-P26
xmas
CG1603
Gαq
CG15643
PolH
stau
pim
CG42239
Hph
meso18E
ND-AGGG
CycA
Axud1
qless
dx
mbt
step
ITP
CG31195
gol
CG10147
CG11309
exd
CG30323
Fs(2)Ket
qkr58E-1
CG32091
Csp
lncRNA:CR45820
Crtc
gce
chinmo
RasGAP1
CG13001
aop
RhoGAP71E
Marf
Tsp39D
Pde9
CG31800
sigmar
CG10669
Kdm4B
Ppa
gish
smo
lncRNA:CR45018
jumu
cv
myo
CG33774
Naus
mof
tna
gny
Tak1
Dna2
ova
ric8a
CG14818
CG5746
Lam
Trf4-1
Ephrin
por
β4GalNAcTA
CG31955
GstT4
Drice
ttk
Ucp4A
Vps50
Cbl
CycB
Ifrd1
mahe
S
rho-4
baz
CG12104
Rab39
CG14441
PlexB
CG15784
CG32756
Fmr1
l(1)G0289
lolal
dgt5
DCP2
GalT1
CanA-14F
sog
CG8814
Taz
CG16717
PAN3
hang
Rilpl
sdt
Smox
hoip
tant
CG2278
Nna1
CG3529
Ssdp
CG32813
Usp16-45
udt
CG14478
HP1D3csd
CG17883
Pp2C1
eas
her
CG14965
Nadsyn
l(3)73Ah
Hinfp
Pvf3
CG1628
kuz
aPKC
nrv1
Reck
Socs44A
Pfrx
CG11357
bab2
Tab2
scramb1
syd
CG5445
CG9902
ewg
pad
whd
CG2076
CG3036
Thor
CG13375
CG10916
rdx
MFS16
fal
CG42296
Rbp1-like
lncRNA:CR44632
mnb
cwo
CG6424
hts
Samuel
CoRest
JTBR
CG13585
CG2258
Agpat1
CG7668
Aduk
aurB
TTLL4A
CG6163
dnc
CG8679
SPoCk
CG17574
CG14200
CG5674
CG17698
osk
CG13559
jp
Pp2B-14D
CG17162
CG17760
Ptpmeg2
bif
stwl
CG16972
CG17931
S6k
jim
AIF
path
DENR
magu
msl-3
RhoGAP18B
vap
msd1
CG10616
Rnf11
CG5316
Zip102B
CG33941
SelR
C3G
CG3726
CkIIα
CG4022
dob
CG11050
pdgy
CG10492
CG12206
Spc25
neur
ex
GstD3
mthl4
CG17490
Crk
CG2924
cta
Paics
CG5455
Dph4
Bmcp
CG10082
RhoGAP92B
mus101
luna
aqz
how
fs(1)K10
CG10803
lncRNA:CR43626
Mctp
Men-b
scramb2
dnk
Parg
amn
CG3164
Pak3
oaf
CG1542
CG1486
roq
Hmt4-20
bc10
Dd
Dyro
cic
CR41440
CG31122
jvl
Br140
Nhe3
ZC3H3
Sdc
CG43736
CG2685
CG42331
MTF-1
Ras85D
flfl
pigs
Zyx
lncRNA:CR43857
CaMKI
Stlk
Fim
VhaPPA1-1
Pits
dl
Nhe1
z
lama
Ptp61F
CG12054
CG3198
twe
RhoGDI
Pep
CG34200
CG1812
Tsp26A
DnaJ-H
CG31998
CG1316
Abcd1
CG11248
SoxN
CG4297
CG14442
GATAd
CG10465
nkd
CG1440
Caper
lncRNA:CR46064
Eaf
lawc
eff
sprt
cass
CG12299
CG34213
CG11444
spi
Usp2
Dyrk2
Odj
Edc3
tyf
CG40439
Cmtr1
CG15435
CG5742
lqf
slmb
cdm
Atg18a
Naprt
Atf6
p120ctn
LIMK1
Mad
milt
Pp4-19C
CG31886
lncRNA:CR43459
Mlf
Stat92E
Mppe
G9a
Afti
Frl
Lint-1
dlg1
Sec61γ
Jra
spt4
CG8008
be
Snx27
pico
RYBP
Liprin-α
SkpA
Dif
mRpS5
Psi
Ndf
Ge-1
CG17683
l(3)02640
mtsh
cnn
CG9743
hfp
CG10948
RhoL
Acbp1
CG5938
Nup153
CG1233
msl-1
CG13004
Klp10A
RNaseX25
CG12643
Ptp10D
Rab7
shi
sov
Vha100-2
S6kII
Ccm3
Rab8
PDCD-5
CG9795
retm
TrpRS
oys
PIG-L
Kap3
CG7376
CkIIβ
mRpL33
Tm1
wds
CIAPIN1
Patronin
AGO2
Atg8a
Prestin
WRNexo
sina
CG10366
CG3548
CG12576
Cul1
shep
Sam-S
Rb97D
CG12290
Usp7
ct
crim
Tlk
Sema1b
CG9815
exex
Wnt5
nudE
Atet
nemy
CG14440
Haspin
Aef1
CG17508
CG4645
lqfR
GramD1B
vig
Ncoa6
Ku80
Pura
Set1
galectin
CG4080
AhcyL1
HSPC300
Vrp1
RhoGAP19D
lola
CG4004
CLIP-190
Rbcn-3B
CG3744
ttv
Usp32
Baldspot
CG2021
CG17598
Rox8
crp
tef
α-Est9
Tpst
CG17264
CG8134
RPA3
CG13631
egh
4E-T
zfh2
Mnn1
edl
CG15715
CG3107
CG17528
Vps11
Usp1
robo1
Ire1
anne
CrebB
Ist1
βGlu
Tsp3A
bbc
CG43759
fra
wgn
CG32638
Irbp18
CG7065
Cdc42
Duba
WASp
PhKγ
dock
CG44325
Bin1
CG12375
Sirt1
pod1
CG17078
Gβ13F
lncRNA:CR31044
l(3)80Fg
Septin1
Fur1
dco
CkIα
Pen
CG10321
stw
CG43658
Graf
CG4101
CG12112
prel
Rac1
CG14464
Snap24
CG10555
DOR
Lrch
Nipped-B
CG1172
CG42542
cyst
Sk2
mamo
CG5953
Bet1
CG15743
CycD
snz
Pcif1
lncRNA:CR43334
Arfip
Mkrn1
fz4
CG12025
Dlic
Ac13E
Mnr
Pgant5
GlcT
Abl
CG6565
Arc42
prtp
Art4
CG31908
ftz-f1
krz
Drat
bsk
MFS14
CG4266
Pkn
gro
RpL38
Ranbp16
Helz
CG3638
CG34031
kune
Rint1
Pld
ArfGAP3
tkv
VhaAC39-1
Oda
Vha26
homer
CG40191
red
CG12012
spn-A
CG9775
Ubr3
CG11141
CG7255
CG2225
CG3651
sl
ytr
Cpsf5
rgr
opm
CG31678
CG11267
Top1
FBXO11
dbr
Nt5b
CG42748
CG1572
CG7222
Hip14
CG32647
drk
Kr-h2
CG8034
Idh3g
pon
CG17691
rasp
CG18549
geminin
CG45050
hrg
CG9044
mub
α-Man-Ib
app
Ythdf
kuk
Meltrin
Gbs-70E
CG9171
UQCR-11
CG1146
kay
CG4049
CG7536
Smurf
CG18088
Hers
ox
CG10600
arr
unc-13
CG3961
CG14650
fwe
Pp1α-96A
Su(Tpl)
Utx
Ras64B
cib
egr
Nop17l
gus
Tsp42Ef
EMC8-9
Hecw
CG13784
CG1737
Bsg25D
Socs36E
Rab6
tay
CG12084
anchor
Spn42Dc
mbl
IP3K1
sp3
polo
Rgl
Pdcd4
kibra
Cont
hrm
CG5854
Pabp2
CG11151
lncRNA:CR43496
N
mei-38
Msh6
qkr58E-2
CG14207
CG1578
yki
DIP1
Sesn
CG10417
dmpd
Mical
CG31145
CG32368
elg1
CG10232
CG15083
Spred
fwd
wcy
CG4911
Strica
upSET
Uev1A
mud
CG10737
mtd
ZnT63C
wnd
Socs16D
Stam
CG11593
Gnpat
lbk
Dgp-1
ash1
Ubqn
E(bx)
Nrx-IV
Lis-1
PMCA
CG4612
dmt
NK7.1
Ank
Lmpt
Doa
CG12730
psq
E2f1
CG32982
bon
CG8289
trc
srp
CG11857
RASSF8
CG17493
lap
CG2991
Adf1
ken
ena
lncRNA:CR45668
CaMKII
Naa60
Ten-m
Dad1
JIL-1
CG41099
Ser
CG42232
CG42788
mbf1
CG7627
Gug
simj
Patr-1
CG14767
wdb
Pka-R1
MESR3
squ
CG33229
Scm
Diap1
SCaMC
CG8929
ClC-c
CG7791
CG5446
Mkk4
CG9917
pav
phol
spri
g
CG2938
schlank
pzg
CG17746
CG13124
sima
CG5521
CG2186
spir
CG14073
tun
sau
promL
kud
CycT
pira
Rho1
Ntf-2
CG40045
Tif-IA
l(3)80Fj
cdi
Su(z)2
east
CG9328
CG46280
CG46281
Orc1
Sec22
Syx7
Hex-A
LPCAT
CG4822
Su(var)3-7
ATP8B
dpr17
Sac1
CG18135
CG32267
Aps
HipHop
ebo
CG2218
Snx6
Pgant7
Asx
Sec16
rump
pes
wap
Dap160
βTub60D
Ref1
H
Sarm
alph
MTA1-like
Zip99C
Reps
Tango5
mxc
B52
Tet
pbl
sxc
CG5726
eIF4G1
endos
CG1815
Cul2
PDZ-GEF
CG6051
CG34398
CG5973
Rtnl1
srl
SF1
Spt20
Jupiter
Hsp60A
Nup98-96
Btk29A
spz
enc
D1
Dscam1
Nopp140
Mcr
CG4360
KdelR
par-1
CG1910
Irk1
cbt
da
CG9727
Zasp52
l(1)G0196
Sec24CD
Bre1
pyd
Ythdc1
koi
Ulp1
Mlc-c
CG2519
alt
gem
PNUTS
eIF4E1
tud
spen
lilli
Sec61α
Hrb27C
Bsg
Cks30A
CG5850
Ubc2
crol
BuGZ
Lamp1
Df31
Tsp42Ee
CanB2
sel
CG7220
Sin3A
Hmgs
CG5174
Hipk
Usp10
Mrtf
CG11537
ImpL2
akirin
Unr
vih
nuf
pum
Tsp86D
Csk
rin
put
Surf4
Sar1
CG45049
eIF4G2
atl
CG33494
Tsp97E
mfrn
CycG
Eph
Vap33
mab-21
Pat1
fs(1)h
mys
UbcE2H
Trf2
His3.3B
l(1)G0320
eIF4H1
mthl1
CG9132
Snoo
kek1
rl
d4
spin
Tollo
l(3)05822
sqh
eIF5
bves
CG3558
CG34126
Pvf2
Hnf4
CG4658
Pect
Swip-1
crc
Marf1
Sting
ClC-b
Dg
CG2765
CG42324
loj
Arp3
Eip75B
CG8765
Nca
Mes2
α-Cat
Cdep
gpp
l(3)L1231
eIF1A
gwl
Mvl
msi
Hmu
Ppn
Fer2LCH
Map205
pan
PlexA
Cals
IntS6
Gclc
Moe
CG7766
CG34408
Ran
Hsc70-3
ben
CG9281
sd
CalpC
CG8188
par-6
Stt3A
snRNA:LU
lncRNA:CR43144
snoRNA:Me28S-G3255a
snoRNA:Me28S-G764
lncRNA:CR45102
lncRNA:roX2
snRNA:U5:14B
Uhg2
bun
Uhg3
CG42238
Atg18b
wech
ATP8A
CG32369
Rbfox1
hzg
Mkp3
Arf79F
Dbp80
pnt
Tdg
sgg
DIP-α
ec
CG12065
Smr
CG6891
Abca3
fog
RnrS
Rap1
CG31523
CG3847
Vha16-1
pAbp
sty
ps
CtBP
sqd
fru
larp
Hrb98DE
zfh1
Xrp1
CG9932
Rala
snRNA:U1:95Ca
EcR
Uhg1
Eip63E
Dlg5
snRNA:U5:34A
B4
mtgo
snoRNA:Me28S-A2113
dnt
Arpc2
Gprk1
14-3-3ζ
AGO1
Trpm
sli
Orai
Sh3β
Pdp1
Mbs
lncRNA:CR45973
skd
ND-MLRQ
CG14657
tara
Cipc
wts
heph
gw
svr
Ubi-p5E
CHES-1-like
rdgA
mgl
Hk
HDAC4
Rab10
l(2)gl
CG4502
heix
tsh
CG17715
uex
mam
Prosap
Ehbp1
CG32276
Larp4B
CG5151
gzl
Vha55
lncRNA:Hsrω
unk
eIF4EHP
Syx1A
plum
spg
pho
lncRNA:CR40469
Myc
Sxl
Tis11

## Sheet: Table S7b
	List of primers used for validation.
Gene	Primer	Primer sequence (5’-3’)
1	wnd_A5_FP	AGCGGAACTCCAAGAAGAGC
	wnd_A5_RP	GCTGAACGGTTGCATTGTCC
2	fusRI_FP	TTCACCACTGGGGATACTCC
	fusRI_RP	TTGATAACCATATGGACACC
3	pepSE_exon6_FP	GGATCGGAGCGTAATATTGG
	pepSE_exon6_RP	CAAGGCGACATGTTCATACC
4	iab4_RI_FP	TTCCTATCGCCACTCACTGG
	iab4_RI_RP	CCCTGTTCTAGACATTAACC
5	spenSE_exon5_FP	AACTACTACGACACAACAAC
	spenSE_exon5_RP	ATCAACATTACTGTCGTCAC
6	Ama_A5_FP	AACATCCTGTAAATAAACAG
	Ama_A5_RP	TATAAGACCGATTAGAAGCC
7	sc35_AF_FP	CCACCTCCACGGATCGATGG
	sc35_AF_RP	GCGGCTCTCACGTGTGTAGC
8	baccA5_FP	CAGTCTTGTACGAACCGTCG
	baccA5_RP	CTGGCCTCTTGGTGCCTTTC
