# Supplementary figures and images for: Sex-specific splicing occurs genome-wide during early Drosophila embryogenesis
Source: eLife journal article supplement (doi:10.7554/elife.87865), 2023-07-19

**A**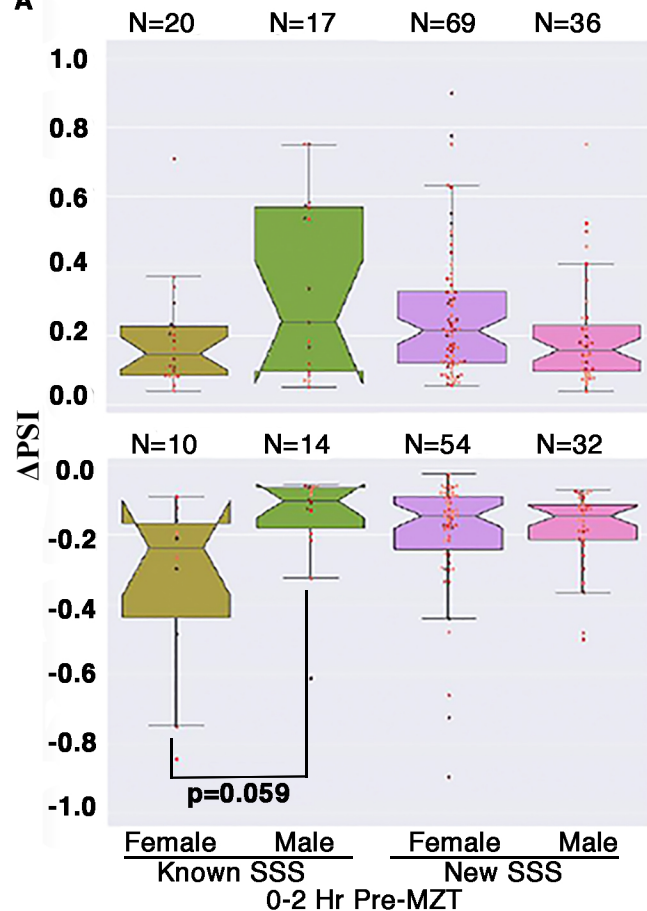**B**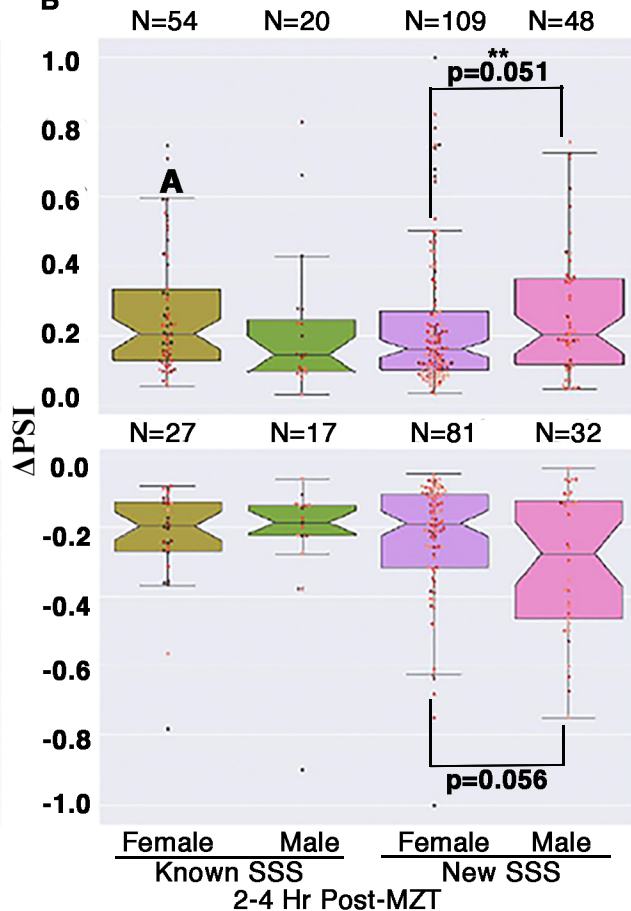

Supplement: supp [file elife_poa_e87865_Figure_2_figure_supplement_2.pdf › elife_poa_e87865_Figure_2_figure_supplement_2.pdf]

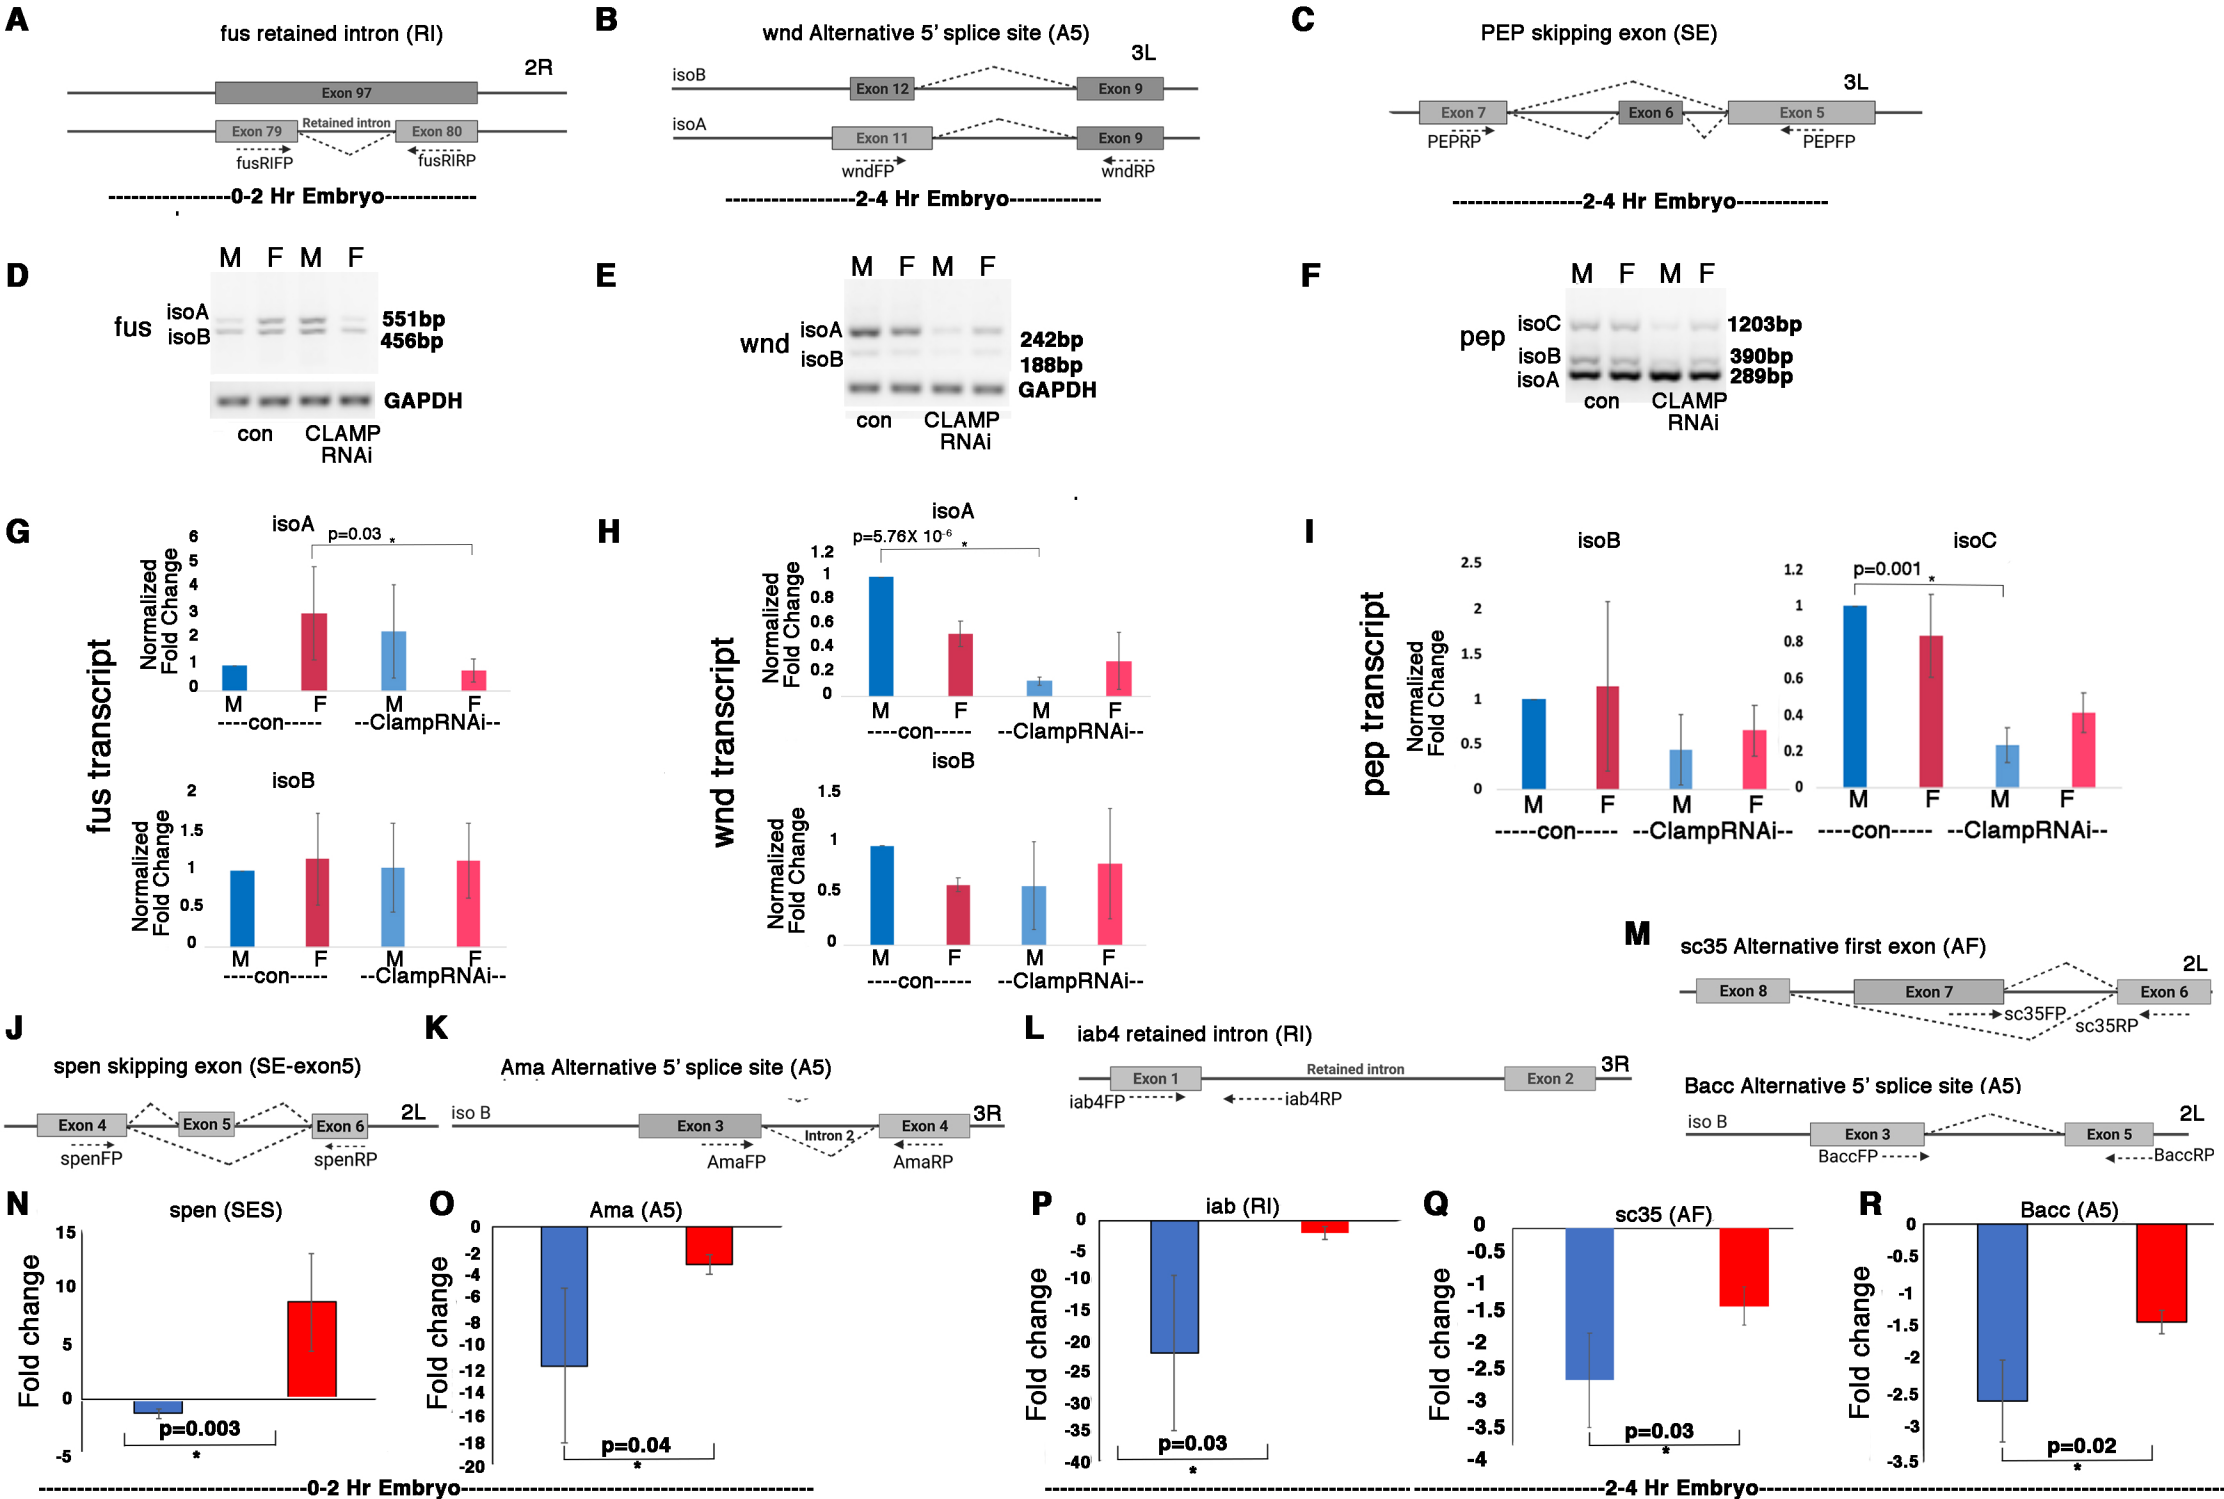

Supplement: supp [file elife_poa_e87865_Figure_2_figure_supplement_3.pdf › elife_poa_e87865_Figure_2_figure_supplement_3.pdf]

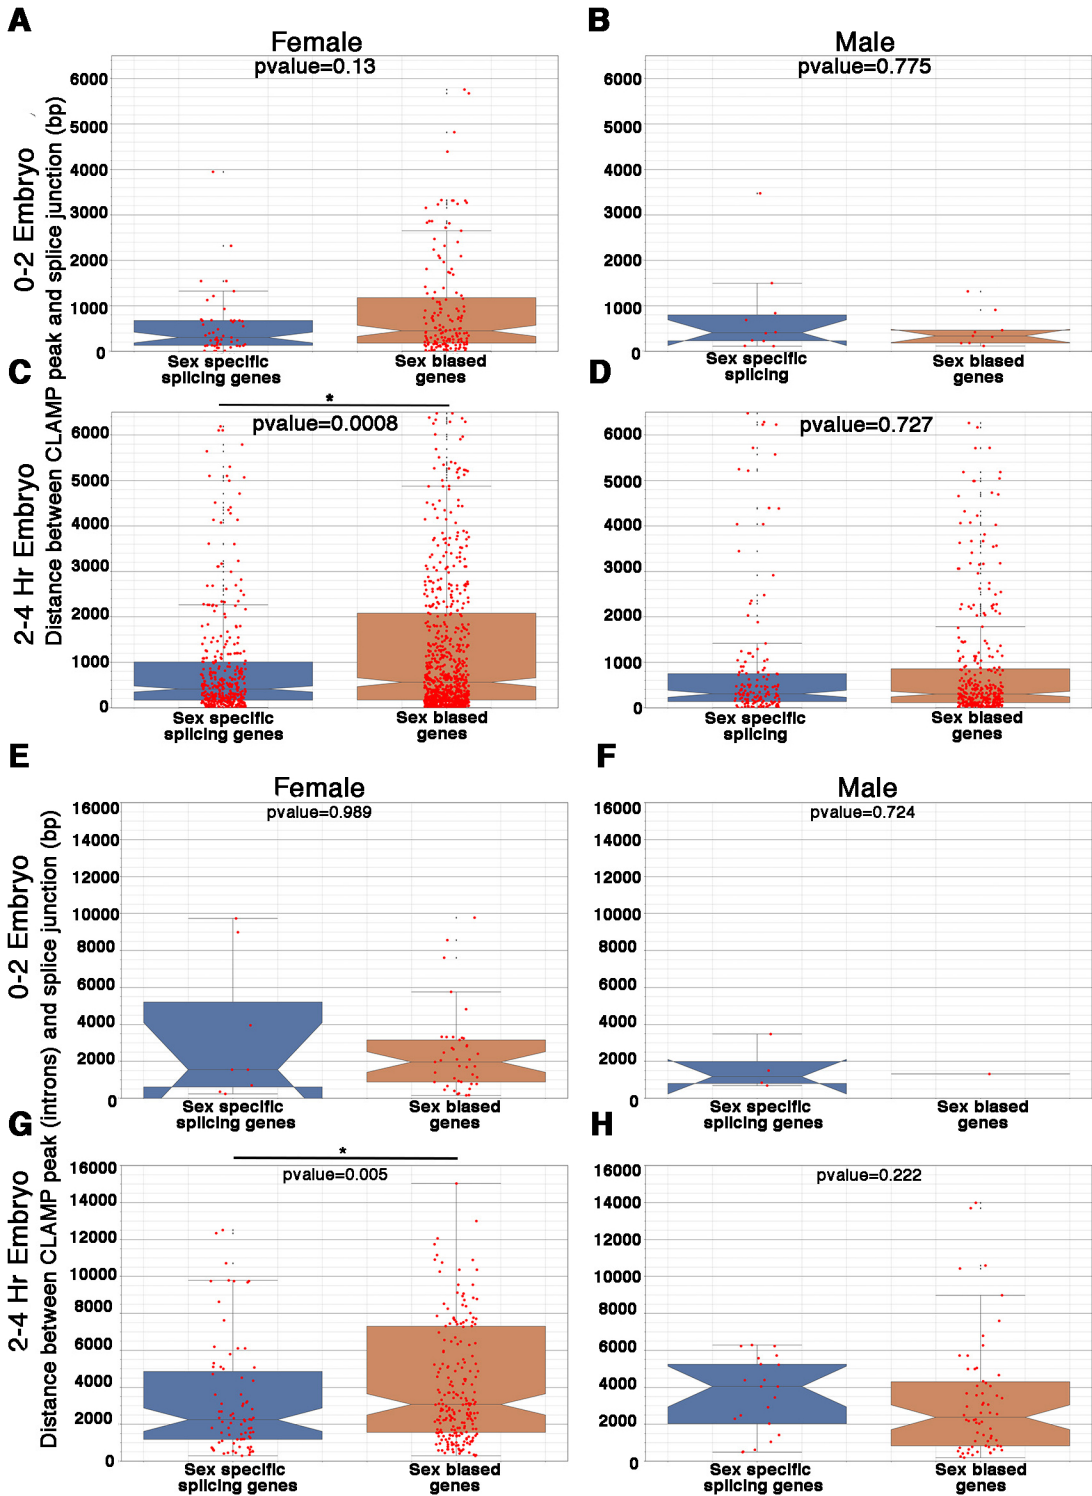

Supplement: supp [file elife_poa_e87865_Figure_4_figure_supplement_1.pdf › elife_poa_e87865_Figure_4_figure_supplement_1.pdf]
